# Supplementary material for: Dual threshold optimization and network inference reveal convergent evidence from TF binding locations and TF perturbation responses
Source: Genome Res. 2020 Mar;30(3):459–71. doi: 10.1101/gr.259655.119 (PMC7111528; doi:10.1101/gr.259655.119)
Supplement: Supplemental Material [file supp_gr.259655.119_Supplemental_File_S1.xlsx]

## Sheet: README
Supplemental File S1: Network edges from acceptable TFs to their bound and responsive genes after dual threshold optimization on Harbison ChIP and Kemmeren TFKO response data.
Column	Description
TF_systematicName	Transcription factor in systematic name
TF_commonName	Transcription factor in common name
Gene_systematicName	Target gene in systematic name
Gene_commonName	Traget gene in common name

## Sheet: Supplemental_File_S1
TF_systematicName	TF_commonName	Gene_systematicName	Gene_commonName
YBL021C	HAP3	YDR377W	ATP17
YBL021C	HAP3	YBR039W	ATP3
YBL021C	HAP3	YGL187C	COX4
YBL021C	HAP3	YHR051W	COX6
YBL021C	HAP3	YJR077C	MIR1
YBL021C	HAP3	YHR001W-A	QCR10
YBL021C	HAP3	YER175C	TMT1
YBL021C	HAP3	YPL207W	TYW1
YBL021C	HAP3	YGR234W	YHB1
YBR083W	TEC1	YNR044W	AGA1
YBR083W	TEC1	YCL027W	FUS1
YBR083W	TEC1	YBL016W	FUS3
YBR083W	TEC1	YGR014W	MSB2
YBR083W	TEC1	YIL119C	RPI1
YBR083W	TEC1	YOR315W	SFG1
YBR083W	TEC1	YKR091W	SRL3
YBR083W	TEC1	YBR083W	TEC1
YBR083W	TEC1	YGR039W	YGR039W
YBR083W	TEC1	YLR467W	YRF1-5
YDL056W	MBP1	YBR070C	ALG14
YDL056W	MBP1	YGR188C	BUB1
YDL056W	MBP1	YLR103C	CDC45
YDL056W	MBP1	YJL194W	CDC6
YDL056W	MBP1	YDL017W	CDC7
YDL056W	MBP1	YGR109C	CLB6
YDL056W	MBP1	YDR263C	DIN7
YDL056W	MBP1	YDL101C	DUN1
YDL056W	MBP1	YBR078W	ECM33
YDL056W	MBP1	YJL196C	ELO1
YDL056W	MBP1	YDL018C	ERP3
YDL056W	MBP1	YMR215W	GAS3
YDL056W	MBP1	YHR061C	GIC1
YDL056W	MBP1	YDR507C	GIN4
YDL056W	MBP1	YCR065W	HCM1
YDL056W	MBP1	YIL026C	IRR1
YDL056W	MBP1	YDL003W	MCD1
YDL056W	MBP1	YDR097C	MSH6
YDL056W	MBP1	YNR009W	NRM1
YDL056W	MBP1	YMR076C	PDS5
YDL056W	MBP1	YDR501W	PLM2
YDL056W	MBP1	YKL113C	RAD27
YDL056W	MBP1	YER095W	RAD51
YDL056W	MBP1	YAR007C	RFA1
YDL056W	MBP1	YER070W	RNR1
YDL056W	MBP1	YAR008W	SEN34
YDL056W	MBP1	YHR149C	SKG6
YDL056W	MBP1	YMR179W	SPT21
YDL056W	MBP1	YOR247W	SRL1
YDL056W	MBP1	YJL187C	SWE1
YDL056W	MBP1	YER071C	TDA2
YDL056W	MBP1	YBR071W	YBR071W
YDL056W	MBP1	YDR115W	YDR115W
YDL056W	MBP1	YJR030C	YJR030C
YDL056W	MBP1	YMR144W	YMR144W
YDR043C	NRG1	YNR060W	FRE4
YDR043C	NRG1	YDR043C	NRG1
YDR043C	NRG1	YEL040W	UTR2
YDR043C	NRG1	YLR012C	YLR012C
YDR146C	SWI5	YPL158C	AIM44
YDR146C	SWI5	YBR158W	AMN1
YDR146C	SWI5	YKL185W	ASH1
YDR146C	SWI5	YBL098W	BNA4
YDR146C	SWI5	YLR390W-A	CCW14
YDR146C	SWI5	YNL192W	CHS1
YDR146C	SWI5	YDL117W	CYK3
YDR146C	SWI5	YNL335W	DDI3
YDR146C	SWI5	YOR264W	DSE3
YDR146C	SWI5	YNL327W	EGT2
YDR146C	SWI5	YLR300W	EXG1
YDR146C	SWI5	YIL009W	FAA3
YDR146C	SWI5	YBR157C	ICS2
YDR146C	SWI5	YDR397C	NCB2
YDR146C	SWI5	YNL078W	NIS1
YDR146C	SWI5	YDL179W	PCL9
YDR146C	SWI5	YGR086C	PIL1
YDR146C	SWI5	YKL164C	PIR1
YDR146C	SWI5	YKL163W	PIR3
YDR146C	SWI5	YDR055W	PST1
YDR146C	SWI5	YJL217W	REE1
YDR146C	SWI5	YLR079W	SIC1
YDR146C	SWI5	YNL047C	SLM2
YDR146C	SWI5	YBR083W	TEC1
YDR146C	SWI5	YPL157W	TGS1
YDR146C	SWI5	YBR071W	YBR071W
YDR146C	SWI5	YDL119C	YDL119C
YDR146C	SWI5	YHR138C	YHR138C
YDR146C	SWI5	YHR214W	YHR214W
YDR146C	SWI5	YIL177C	YIL177C
YDR146C	SWI5	YLR049C	YLR049C
YDR146C	SWI5	YLR194C	YLR194C
YDR146C	SWI5	YNL046W	YNL046W
YDR146C	SWI5	YPL283C	YRF1-7
YDR259C	YAP6	YMR319C	FET4
YDR259C	YAP6	YHR049W	FSH1
YDR259C	YAP6	YMR136W	GAT2
YDR259C	YAP6	YOL151W	GRE2
YDR259C	YAP6	YOL155C	HPF1
YDR259C	YAP6	YOL157C	IMA2
YDR259C	YAP6	YJL221C	IMA4
YDR259C	YAP6	YJR094C	IME1
YDR259C	YAP6	YOR181W	LAS17
YDR259C	YAP6	YER028C	MIG3
YDR259C	YAP6	RPL33a	RPL33a
YDR259C	YAP6	YDR259C	YAP6
YDR259C	YAP6	YGR234W	YHB1
YDR310C	SUM1	YJR025C	BNA1
YDR310C	SUM1	YJR078W	BNA2
YDR310C	SUM1	YBL098W	BNA4
YDR310C	SUM1	YLR231C	BNA5
YDR310C	SUM1	YLR307W	CDA1
YDR310C	SUM1	YLR308W	CDA2
YDR310C	SUM1	YLR213C	CRR1
YDR310C	SUM1	YIR027C	DAL1
YDR310C	SUM1	YIR028W	DAL4
YDR310C	SUM1	YFR012W	DCV1
YDR310C	SUM1	YBR201W	DER1
YDR310C	SUM1	YDR403W	DIT1
YDR310C	SUM1	YBR180W	DTR1
YDR310C	SUM1	YBR076W	ECM8
YDR310C	SUM1	YLR343W	GAS2
YDR310C	SUM1	YBR045C	GIP1
YDR310C	SUM1	YGR256W	GND2
YDR310C	SUM1	YOR237W	HES1
YDR310C	SUM1	YDR317W	HIM1
YDR310C	SUM1	YDR533C	HSP31
YDR310C	SUM1	YNL318C	HXT14
YDR310C	SUM1	YJL037W	IRC18
YDR310C	SUM1	YPR139C	LOA1
YDR310C	SUM1	YJL038C	LOH1
YDR310C	SUM1	YER106W	MAM1
YDR310C	SUM1	YHR015W	MIP6
YDR310C	SUM1	YOR298W	MUM3
YDR310C	SUM1	YOR071C	NRT1
YDR310C	SUM1	YOR255W	OSW1
YDR310C	SUM1	YFR023W	PES4
YDR310C	SUM1	YHR185C	PFS1
YDR310C	SUM1	YDR281C	PHM6
YDR310C	SUM1	YML047C	PRM6
YDR310C	SUM1	YOR347C	PYK2
YDR310C	SUM1	YFR032C	RRT5
YDR310C	SUM1	YPL027W	SMA1
YDR310C	SUM1	YPL130W	SPO19
YDR310C	SUM1	YOL091W	SPO21
YDR310C	SUM1	YGL170C	SPO74
YDR310C	SUM1	YLL005C	SPO75
YDR310C	SUM1	YLR341W	SPO77
YDR310C	SUM1	YGR059W	SPR3
YDR310C	SUM1	YDR523C	SPS1
YDR310C	SUM1	YNL204C	SPS18
YDR310C	SUM1	YNL202W	SPS19
YDR310C	SUM1	YDR522C	SPS2
YDR310C	SUM1	YCL048W	SPS22
YDR310C	SUM1	YOR313C	SPS4
YDR310C	SUM1	YPL033C	SRL4
YDR310C	SUM1	YHR184W	SSP1
YDR310C	SUM1	YDR310C	SUM1
YDR310C	SUM1	YGR260W	TNA1
YDR310C	SUM1	YOL102C	TPT1
YDR310C	SUM1	YDL186W	YDL186W
YDR310C	SUM1	YDR042C	YDR042C
YDR310C	SUM1	YER085C	YER085C
YDR310C	SUM1	YER187W	YER187W
YDR310C	SUM1	YFL040W	YFL040W
YDR310C	SUM1	YGL015C	YGL015C
YDR310C	SUM1	YGL138C	YGL138C
YDR310C	SUM1	YHL012W	YHL012W
YDR310C	SUM1	YJL043W	YJL043W
YDR310C	SUM1	YJR079W	YJR079W
YDR310C	SUM1	YJR107W	YJR107W
YDR310C	SUM1	YKR015C	YKR015C
YDR310C	SUM1	YOL047C	YOL047C
YDR310C	SUM1	YOR365C	YOR365C
YDR310C	SUM1	YPR078C	YPR078C
YDR310C	SUM1	YBR148W	YSW1
YDR421W	ARO80	YDR421W	ARO80
YDR421W	ARO80	YHR137W	ARO9
YDR421W	ARO80	YNL125C	ESBP6
YEL009C	GCN4	YBR145W	ADH5
YEL009C	GCN4	YER073W	ALD5
YEL009C	GCN4	YOL058W	ARG1
YEL009C	GCN4	YHR018C	ARG4
YEL009C	GCN4	YMR062C	ARG7
YEL009C	GCN4	YOL140W	ARG8
YEL009C	GCN4	YDR127W	ARO1
YEL009C	GCN4	YDR035W	ARO3
YEL009C	GCN4	YJR025C	BNA1
YEL009C	GCN4	YPL111W	CAR1
YEL009C	GCN4	YJR109C	CPA2
YEL009C	GCN4	YDL198C	GGC1
YEL009C	GCN4	YCL030C	HIS4
YEL009C	GCN4	YER052C	HOM3
YEL009C	GCN4	YNL104C	LEU4
YEL009C	GCN4	YOR108W	LEU9
YEL009C	GCN4	YOL119C	MCH4
YEL009C	GCN4	YHR071W	PCL5
YEL009C	GCN4	YMR095C	SNO1
YEL009C	GCN4	YMR096W	SNZ1
YER111C	SWI4	YER045C	ACA1
YER111C	SWI4	YNR044W	AGA1
YER111C	SWI4	YBR070C	ALG14
YER111C	SWI4	YKL103C	APE1
YER111C	SWI4	YJL115W	ASF1
YER111C	SWI4	YJR148W	BAT2
YER111C	SWI4	YKL007W	CAP1
YER111C	SWI4	YJL194W	CDC6
YER111C	SWI4	YJL158C	CIS3
YER111C	SWI4	YNL298W	CLA4
YER111C	SWI4	YPR119W	CLB2
YER111C	SWI4	YGR110W	CLD1
YER111C	SWI4	YMR199W	CLN1
YER111C	SWI4	YPL256C	CLN2
YER111C	SWI4	YAL040C	CLN3
YER111C	SWI4	YJR048W	CYC1
YER111C	SWI4	YEL039C	CYC7
YER111C	SWI4	YBR112C	CYC8
YER111C	SWI4	YJL196C	ELO1
YER111C	SWI4	YOR246C	ENV9
YER111C	SWI4	YLR300W	EXG1
YER111C	SWI4	YDR261C	EXG2
YER111C	SWI4	YMR319C	FET4
YER111C	SWI4	YER004W	FMP52
YER111C	SWI4	YDR507C	GIN4
YER111C	SWI4	YDL022W	GPD1
YER111C	SWI4	YDR513W	GRX2
YER111C	SWI4	YEL017W	GTT3
YER111C	SWI4	YLR256W	HAP1
YER111C	SWI4	YCR065W	HCM1
YER111C	SWI4	YBR009C	HHF1
YER111C	SWI4	YBR010W	HHT1
YER111C	SWI4	YJR147W	HMS2
YER111C	SWI4	YMR251W-A	HOR7
YER111C	SWI4	YJL159W	HSP150
YER111C	SWI4	YDR225W	HTA1
YER111C	SWI4	YBL003C	HTA2
YER111C	SWI4	YDR224C	HTB1
YER111C	SWI4	YBL002W	HTB2
YER111C	SWI4	YOL012C	HTZ1
YER111C	SWI4	YGL253W	HXK2
YER111C	SWI4	Ho	Ho
YER111C	SWI4	YFR017C	IGD1
YER111C	SWI4	YKL161C	KDX1
YER111C	SWI4	YBR299W	MAL32
YER111C	SWI4	YBL023C	MCM2
YER111C	SWI4	YKL150W	MCR1
YER111C	SWI4	YER001W	MNN1
YER111C	SWI4	YOR066W	MSA1
YER111C	SWI4	YGR014W	MSB2
YER111C	SWI4	YKL062W	MSN4
YER111C	SWI4	YJL116C	NCA3
YER111C	SWI4	YMR145C	NDE1
YER111C	SWI4	YNR009W	NRM1
YER111C	SWI4	YBR230C	OM14
YER111C	SWI4	YNL289W	PCL1
YER111C	SWI4	YIL013C	PDR11
YER111C	SWI4	YNL231C	PDR16
YER111C	SWI4	YMR076C	PDS5
YER111C	SWI4	YMR006C	PLB2
YER111C	SWI4	YDR501W	PLM2
YER111C	SWI4	YJL079C	PRY1
YER111C	SWI4	YKR013W	PRY2
YER111C	SWI4	YDL055C	PSA1
YER111C	SWI4	YKR093W	PTR2
YER111C	SWI4	YLR142W	PUT1
YER111C	SWI4	YBR073W	RDH54
YER111C	SWI4	YPL024W	RMI1
YER111C	SWI4	YMR266W	RSN1
YER111C	SWI4	YGR152C	RSR1
YER111C	SWI4	YOR315W	SFG1
YER111C	SWI4	YIL099W	SGA1
YER111C	SWI4	YHR149C	SKG6
YER111C	SWI4	YOL113W	SKM1
YER111C	SWI4	YBR077C	SLM4
YER111C	SWI4	YDR073W	SNF11
YER111C	SWI4	YMR179W	SPT21
YER111C	SWI4	YOR247W	SRL1
YER111C	SWI4	YML052W	SUR7
YER111C	SWI4	YPL163C	SVS1
YER111C	SWI4	YPL016W	SWI1
YER111C	SWI4	YER111C	SWI4
YER111C	SWI4	YNL087W	TCB2
YER111C	SWI4	YBR083W	TEC1
YER111C	SWI4	YER011W	TIR1
YER111C	SWI4	YJL093C	TOK1
YER111C	SWI4	YBR162C	TOS1
YER111C	SWI4	YGR221C	TOS2
YER111C	SWI4	YNL300W	TOS6
YER111C	SWI4	YDR453C	TSA2
YER111C	SWI4	YOR344C	TYE7
YER111C	SWI4	YKR042W	UTH1
YER111C	SWI4	YAR035W	YAT1
YER111C	SWI4	YBR071W	YBR071W
YER111C	SWI4	YDR222W	YDR222W
YER111C	SWI4	YGR153W	YGR153W
YER111C	SWI4	YGR234W	YHB1
YER111C	SWI4	YDR451C	YHP1
YER111C	SWI4	YJR149W	YJR149W
YER111C	SWI4	YKL151C	YKL151C
YER111C	SWI4	YKL067W	YNK1
YER111C	SWI4	YOL019W	YOL019W
YER111C	SWI4	YML027W	YOX1
YER111C	SWI4	YLR121C	YPS3
YFL021W	GAT1	YNR016C	ACC1
YFL021W	GAT1	YJL088W	ARG3
YFL021W	GAT1	YOR113W	AZF1
YFL021W	GAT1	YPL265W	DIP5
YFL021W	GAT1	YOL030W	GAS5
YFL021W	GAT1	YDR019C	GCV1
YFL021W	GAT1	YJL212C	OPT1
YFL021W	GAT1	YHR179W	OYE2
YFL021W	GAT1	YEL060C	PRB1
YFL021W	GAT1	YDL140C	RPO21
YFL021W	GAT1	YLR378C	SEC61
YFL021W	GAT1	YPL032C	SVL3
YGL035C	MIG1	YDR441C	APT2
YGL035C	MIG1	YOL156W	HXT11
YGL035C	MIG1	YEL069C	HXT13
YGL035C	MIG1	YJL219W	HXT9
YGL035C	MIG1	YCR073C	SSK22
YGL237C	HAP2	YDR377W	ATP17
YGL237C	HAP2	YBR039W	ATP3
YGL237C	HAP2	YGL187C	COX4
YGL237C	HAP2	YHR051W	COX6
YGL237C	HAP2	YJR077C	MIR1
YGL237C	HAP2	YHR001W-A	QCR10
YGL237C	HAP2	YDR529C	QCR7
YGL237C	HAP2	YGR183C	QCR9
YGL237C	HAP2	YEL024W	RIP1
YGL237C	HAP2	YGR234W	YHB1
YHL020C	OPI1	YKL182W	FAS1
YHL020C	OPI1	YPL231W	FAS2
YHL020C	OPI1	YDR497C	ITR1
YHR006W	STP2	YDR216W	ADR1
YHR006W	STP2	YCL025C	AGP1
YHR006W	STP2	YOL077W-A	ATP19
YHR006W	STP2	YLR303W	MET17
YHR084W	STE12	YNR044W	AGA1
YHR084W	STE12	YCL027W	FUS1
YHR084W	STE12	YBL016W	FUS3
YHR084W	STE12	YDR309C	GIC2
YHR084W	STE12	YHR005C	GPA1
YHR084W	STE12	YCL055W	KAR4
YHR084W	STE12	YGR014W	MSB2
YHR084W	STE12	YIL037C	PRM2
YHR084W	STE12	YLR452C	SST2
YHR084W	STE12	YHR084W	STE12
YHR084W	STE12	YBR083W	TEC1
YHR206W	SKN7	YLR109W	AHP1
YHR206W	SKN7	YGR097W	ASK10
YHR206W	SKN7	YJL158C	CIS3
YHR206W	SKN7	YMR199W	CLN1
YHR206W	SKN7	YOR100C	CRC1
YHR206W	SKN7	YKL096W-A	CWP2
YHR206W	SKN7	YMR173W	DDR48
YHR206W	SKN7	YGR060W	ERG25
YHR206W	SKN7	YMR307W	GAS1
YHR206W	SKN7	YDR309C	GIC2
YHR206W	SKN7	YGR032W	GSC2
YHR206W	SKN7	YDR232W	HEM1
YHR206W	SKN7	YDR044W	HEM13
YHR206W	SKN7	YBR157C	ICS2
YHR206W	SKN7	YMR195W	ICY1
YHR206W	SKN7	YJL106W	IME2
YHR206W	SKN7	YDL049C	KNH1
YHR206W	SKN7	YLL019C	KNS1
YHR206W	SKN7	YDL182W	LYS20
YHR206W	SKN7	YER001W	MNN1
YHR206W	SKN7	YKL062W	MSN4
YHR206W	SKN7	YJL116C	NCA3
YHR206W	SKN7	YGL038C	OCH1
YHR206W	SKN7	YDL127W	PCL2
YHR206W	SKN7	YJL108C	PRM10
YHR206W	SKN7	YJL079C	PRY1
YHR206W	SKN7	YKR013W	PRY2
YHR206W	SKN7	YER075C	PTP3
YHR206W	SKN7	YNR018W	RCF2
YHR206W	SKN7	YGR180C	RNR4
YHR206W	SKN7	YPR065W	ROX1
YHR206W	SKN7	YGR213C	RTA1
YHR206W	SKN7	YMR305C	SCW10
YHR206W	SKN7	YGR279C	SCW4
YHR206W	SKN7	YCR073C	SSK22
YHR206W	SKN7	YDR297W	SUR2
YHR206W	SKN7	SUR4	SUR4
YHR206W	SKN7	YPR009W	SUT2
YHR206W	SKN7	YER011W	TIR1
YHR206W	SKN7	YKR042W	UTH1
YHR206W	SKN7	YLR108C	YLR108C
YHR206W	SKN7	YLR257W	YLR257W
YHR206W	SKN7	YMR252C	YMR252C
YHR206W	SKN7	YNL058C	YNL058C
YIL131C	FKH1	YGL256W	ADH4
YIL131C	FKH1	YBR158W	AMN1
YIL131C	FKH1	YCL064C	CHA1
YIL131C	FKH1	YDR179C	CSN9
YIL131C	FKH1	YLR286C	CTS1
YIL131C	FKH1	YER124C	DSE1
YIL131C	FKH1	YHR143W	DSE2
YIL131C	FKH1	YCR075C	ERS1
YIL131C	FKH1	YLR300W	EXG1
YIL131C	FKH1	YMR306W	FKS3
YIL131C	FKH1	YHR049W	FSH1
YIL131C	FKH1	YCL027W	FUS1
YIL131C	FKH1	YMR215W	GAS3
YIL131C	FKH1	YPL116W	HOS3
YIL131C	FKH1	YHR094C	HXT1
YIL131C	FKH1	YKL001C	MET14
YIL131C	FKH1	YJR112W	NNF1
YIL131C	FKH1	YDR113C	PDS1
YIL131C	FKH1	YJL078C	PRY3
YIL131C	FKH1	YGL028C	SCW11
YIL131C	FKH1	YLR092W	SUL2
YIL131C	FKH1	YGR099W	TEL2
YIL131C	FKH1	YDR325W	YCG1
YIL131C	FKH1	YDR179W-A	YDR179W-A
YIL131C	FKH1	YMR144W	YMR144W
YIR023W	DAL81	YPR145W	ASN1
YIR023W	DAL81	YBR068C	BAP2
YIR023W	DAL81	YDR046C	BAP3
YIR023W	DAL81	YOL126C	MDH2
YIR023W	DAL81	YLR303W	MET17
YIR023W	DAL81	YJL212C	OPT1
YIR023W	DAL81	YKR093W	PTR2
YIR023W	DAL81	YDL153C	SAS10
YIR023W	DAL81	YBR069C	TAT1
YJL056C	ZAP1	YJL055W	YJL055W
YJL056C	ZAP1	YJL056C	ZAP1
YJL056C	ZAP1	YLR130C	ZRT2
YJR094C	IME1	YNL041C	COG6
YJR094C	IME1	YDL051W	LHP1
YJR094C	IME1	RHR2	RHR2
YJR094C	IME1	YDL052C	SLC1
YJR094C	IME1	YBR265W	TSC10
YJR094C	IME1	YGR125W	YGR125W
YJR094C	IME1	YBR264C	YPT10
YKL032C	IXR1	YDR441C	APT2
YKL032C	IXR1	YBR203W	COS111
YKL032C	IXR1	YLR213C	CRR1
YKL032C	IXR1	YKR076W	ECM4
YKL032C	IXR1	YLR300W	EXG1
YKL032C	IXR1	YHR005C	GPA1
YKL032C	IXR1	YHR094C	HXT1
YKL032C	IXR1	YJL214W	HXT8
YKL032C	IXR1	YDL247W	MPH2
YKL032C	IXR1	YMR061W	RNA14
YKL032C	IXR1	YGR065C	VHT1
YKL032C	IXR1	YAL064W	YAL064W
YKL032C	IXR1	YHR210C	YHR210C
YKL032C	IXR1	YJR015W	YJR015W
YKL032C	IXR1	YLR312C	YLR312C
YKL032C	IXR1	YOR062C	YOR062C
YKL038W	RGT1	YHR094C	HXT1
YKL038W	RGT1	YOL156W	HXT11
YKL038W	RGT1	YJL219W	HXT9
YKL038W	RGT1	YER028C	MIG3
YKL109W	HAP4	YBL099W	ATP1
YKL109W	HAP4	YDL004W	ATP16
YKL109W	HAP4	YDR377W	ATP17
YKL109W	HAP4	YJR121W	ATP2
YKL109W	HAP4	YPR020W	ATP20
YKL109W	HAP4	YDR298C	ATP5
YKL109W	HAP4	YKL016C	ATP7
YKL109W	HAP4	YBL045C	COR1
YKL109W	HAP4	YLR038C	COX12
YKL109W	HAP4	YGL191W	COX13
YKL109W	HAP4	YGL187C	COX4
YKL109W	HAP4	COX5a	COX5a
YKL109W	HAP4	YHR051W	COX6
YKL109W	HAP4	YMR256C	COX7
YKL109W	HAP4	YLR395C	COX8
YKL109W	HAP4	YOR065W	CYT1
YKL109W	HAP4	YDL181W	INH1
YKL109W	HAP4	YBL030C	PET9
YKL109W	HAP4	YHR001W-A	QCR10
YKL109W	HAP4	YPR191W	QCR2
YKL109W	HAP4	YFR033C	QCR6
YKL109W	HAP4	YDR529C	QCR7
YKL109W	HAP4	YGR183C	QCR9
YKL109W	HAP4	YEL024W	RIP1
YKL109W	HAP4	YML091C	RPM2
YKL109W	HAP4	YLR168C	UPS2
YKL109W	HAP4	YOR064C	YNG1
YKR099W	BAS1	YLR359W	ADE13
YKR099W	BAS1	YMR120C	ADE17
YKR099W	BAS1	YOR128C	ADE2
YKR099W	BAS1	YGR204W	ADE3
YKR099W	BAS1	YMR300C	ADE4
YKR099W	BAS1	YGL234W	ADE5,7
YKR099W	BAS1	YGR061C	ADE6
YKR099W	BAS1	YDR408C	ADE8
YKR099W	BAS1	YER061C	CEM1
YKR099W	BAS1	YDR019C	GCV1
YKR099W	BAS1	YMR189W	GCV2
YKR099W	BAS1	YAL044C	GCV3
YKR099W	BAS1	YER091C	MET6
YKR099W	BAS1	YKR080W	MTD1
YKR099W	BAS1	YLR058C	SHM2
YKR099W	BAS1	YGL186C	TPN1
YLR131C	ACE2	YBR158W	AMN1
YLR131C	ACE2	YGR041W	BUD9
YLR131C	ACE2	YLR286C	CTS1
YLR131C	ACE2	YER124C	DSE1
YLR131C	ACE2	YHR143W	DSE2
YLR131C	ACE2	YNL327W	EGT2
YLR131C	ACE2	YML008C	ERG6
YLR131C	ACE2	YJR147W	HMS2
YLR131C	ACE2	YJL078C	PRY3
YLR131C	ACE2	YGL028C	SCW11
YLR176C	RFX1	YOR280C	FSH3
YLR176C	RFX1	YMR177W	MMT1
YLR176C	RFX1	YJL026W	RNR2
YLR176C	RFX1	YIL066C	RNR3
YLR176C	RFX1	YGR180C	RNR4
YLR176C	RFX1	YLR034C	SMF3
YLR176C	RFX1	YDL129W	YDL129W
YLR176C	RFX1	YMR279C	YMR279C
YLR176C	RFX1	YOR378W	YOR378W
YLR256W	HAP1	YJR048W	CYC1
YLR256W	HAP1	YLR256W	HAP1
YLR256W	HAP1	YGR234W	YHB1
YLR451W	LEU3	YER073W	ALD5
YLR451W	LEU3	YBR068C	BAP2
YLR451W	LEU3	YHR208W	BAT1
YLR451W	LEU3	YJR016C	ILV3
YLR451W	LEU3	YOR226C	ISU2
YLR451W	LEU3	YGL009C	LEU1
YLR451W	LEU3	YNL104C	LEU4
YLR451W	LEU3	YKL120W	OAC1
YML007W	YAP1	YLR109W	AHP1
YML007W	YAP1	YML116W	ATR1
YML007W	YAP1	YJR109C	CPA2
YML007W	YAP1	YKR071C	DRE2
YML007W	YAP1	YGR060W	ERG25
YML007W	YAP1	YER044C	ERG28
YML007W	YAP1	YDR261C	EXG2
YML007W	YAP1	YOL151W	GRE2
YML007W	YAP1	YJL101C	GSH1
YML007W	YAP1	YDR533C	HSP31
YML007W	YAP1	YDL182W	LYS20
YML007W	YAP1	YOL119C	MCH4
YML007W	YAP1	YKR052C	MRS4
YML007W	YAP1	YHR179W	OYE2
YML007W	YAP1	YNL231C	PDR16
YML007W	YAP1	YPR065W	ROX1
YML007W	YAP1	YDR011W	SNQ2
YML007W	YAP1	YJR104C	SOD1
YML007W	YAP1	YML028W	TSA1
YML007W	YAP1	YLL058W	YLL058W
YML007W	YAP1	YLR108C	YLR108C
YML007W	YAP1	YLR460C	YLR460C
YML007W	YAP1	YML131W	YML131W
YML007W	YAP1	YNL134C	YNL134C
YML027W	YOX1	YJL194W	CDC6
YML027W	YOX1	YGR092W	DBF2
YML027W	YOX1	YJL196C	ELO1
YML027W	YOX1	YDR191W	HST4
YML027W	YOX1	YPL242C	IQG1
YML027W	YOX1	YEL032W	MCM3
YML027W	YOX1	YLR274W	MCM5
YML027W	YOX1	YBR202W	MCM7
YML027W	YOX1	YOR066W	MSA1
YML027W	YOX1	YLR273C	PIG1
YML099C	ARG81	YOL058W	ARG1
YML099C	ARG81	YJL088W	ARG3
YML099C	ARG81	YER069W	ARG5,6
YML099C	ARG81	YOL140W	ARG8
YML099C	ARG81	YML099C	ARG81
YML099C	ARG81	YFL023W	BUD27
YML099C	ARG81	YOR303W	CPA1
YML099C	ARG81	YOR302W	YOR302W
YMR016C	SOK2	YHL040C	ARN1
YMR016C	SOK2	YGR230W	BNS1
YMR016C	SOK2	YGR108W	CLB1
YMR016C	SOK2	YPL177C	CUP9
YMR016C	SOK2	YBL043W	ECM13
YMR016C	SOK2	YIL009W	FAA3
YMR016C	SOK2	YHR049W	FSH1
YMR016C	SOK2	YKR106W	GEX2
YMR016C	SOK2	YOR032C	HMS1
YMR016C	SOK2	YBR157C	ICS2
YMR016C	SOK2	YER001W	MNN1
YMR016C	SOK2	YKL062W	MSN4
YMR016C	SOK2	YGL158W	RCK1
YMR016C	SOK2	YJL217W	REE1
YMR016C	SOK2	YIL119C	RPI1
YMR016C	SOK2	YIL099W	SGA1
YMR016C	SOK2	YOL122C	SMF1
YMR016C	SOK2	YMR016C	SOK2
YMR016C	SOK2	YDL246C	SOR2
YMR016C	SOK2	YMR017W	SPO20
YMR016C	SOK2	YLR237W	THI7
YMR016C	SOK2	YIL011W	TIR3
YMR016C	SOK2	YGL096W	TOS8
YMR016C	SOK2	YEL040W	UTR2
YMR016C	SOK2	YBL029W	YBL029W
YMR016C	SOK2	YHR022C	YHR022C
YMR016C	SOK2	YHR210C	YHR210C
YMR016C	SOK2	YJL218W	YJL218W
YMR016C	SOK2	YKL044W	YKL044W
YMR016C	SOK2	YLL053C	YLL053C
YMR016C	SOK2	YOR062C	YOR062C
YMR016C	SOK2	ZMS1	ZMS1
YMR016C	SOK2	YER033C	ZRG8
YMR019W	STB4	YPR128C	ANT1
YMR019W	STB4	YBR047W	FMP23
YMR019W	STB4	YLL060C	GTT2
YMR019W	STB4	YBR222C	PCS60
YMR019W	STB4	YLL055W	YCT1
YMR019W	STB4	YEL020C	YEL020C
YMR019W	STB4	YIL166C	YIL166C
YMR019W	STB4	YLL056C	YLL056C
YMR019W	STB4	YLL058W	YLL058W
YMR019W	STB4	YBR046C	ZTA1
YMR042W	ARG80	YJL088W	ARG3
YMR042W	ARG80	YER069W	ARG5,6
YMR042W	ARG80	YOL140W	ARG8
YMR042W	ARG80	YFL023W	BUD27
YMR042W	ARG80	YOR303W	CPA1
YNL167C	SKO1	YMR303C	ADH2
YNL167C	SKO1	YDR441C	APT2
YNL167C	SKO1	YOR349W	CIN1
YNL167C	SKO1	YOR303W	CPA1
YNL167C	SKO1	YKL096W	CWP1
YNL167C	SKO1	FMP43	FMP43
YNL167C	SKO1	YHR049W	FSH1
YNL167C	SKO1	YPR005C	HAL1
YNL167C	SKO1	YJR147W	HMS2
YNL167C	SKO1	YOL156W	HXT11
YNL167C	SKO1	YJL219W	HXT9
YNL167C	SKO1	YOL157C	IMA2
YNL167C	SKO1	YJL221C	IMA4
YNL167C	SKO1	YJL106W	IME2
YNL167C	SKO1	YKL110C	KTI12
YNL167C	SKO1	YGR249W	MGA1
YNL167C	SKO1	YHR071W	PCL5
YNL167C	SKO1	YBL030C	PET9
YNL167C	SKO1	YOR161C	PNS1
YNL167C	SKO1	YJL108C	PRM10
YNL167C	SKO1	YER075C	PTP3
YNL167C	SKO1	YDR073W	SNF11
YNL167C	SKO1	YNR034W	SOL1
YNL167C	SKO1	YER150W	SPI1
YNL167C	SKO1	YGR050C	YGR050C
YNL167C	SKO1	YHR033W	YHR033W
YNL167C	SKO1	YJL107C	YJL107C
YNL167C	SKO1	YLR108C	YLR108C
YNL167C	SKO1	YOR302W	YOR302W
YNL314W	DAL82	YLR438W	CAR2
YNL314W	DAL82	YIR027C	DAL1
YNL314W	DAL82	YIR028W	DAL4
YOL089C	HAL9	YER001W	MNN1
YOL089C	HAL9	YKL062W	MSN4
YOL089C	HAL9	YHR179W	OYE2
YOL089C	HAL9	YPL171C	OYE3
YOL089C	HAL9	YOL084W	PHM7
YOL089C	HAL9	YNL134C	YNL134C
YOR028C	CIN5	YHR047C	AAP1
YOR028C	CIN5	YER045C	ACA1
YOR028C	CIN5	YDR441C	APT2
YOR028C	CIN5	YLL052C	AQY2
YOR028C	CIN5	YOR303W	CPA1
YOR028C	CIN5	YOR317W	FAA1
YOR028C	CIN5	YMR319C	FET4
YOR028C	CIN5	YEL046C	GLY1
YOR028C	CIN5	YGR238C	KEL2
YOR028C	CIN5	YOR306C	MCH5
YOR028C	CIN5	YMR177W	MMT1
YOR028C	CIN5	YPR149W	NCE102
YOR028C	CIN5	YGR180C	RNR4
YOR028C	CIN5	YPR065W	ROX1
YOR028C	CIN5	YDR077W	SED1
YOR028C	CIN5	YNL087W	TCB2
YOR028C	CIN5	YFL004W	VTC2
YOR028C	CIN5	YJR003C	YJR003C
YOR028C	CIN5	YLL053C	YLL053C
YOR028C	CIN5	YLL054C	YLL054C
YOR028C	CIN5	YML131W	YML131W
YOR028C	CIN5	YOR302W	YOR302W
YOR028C	CIN5	YLR121C	YPS3
YOR358W	HAP5	YDR377W	ATP17
YOR358W	HAP5	YBR039W	ATP3
YOR358W	HAP5	YGL187C	COX4
YOR358W	HAP5	YHR051W	COX6
YOR358W	HAP5	YJR077C	MIR1
YOR358W	HAP5	YHR001W-A	QCR10
YOR358W	HAP5	YPL207W	TYW1
YOR358W	HAP5	YLR168C	UPS2
YPL038W	MET31	YJL060W	BNA3
YPL038W	MET31	YNL191W	DUG3
YPL038W	MET31	YER092W	IES5
YPL038W	MET31	YPR167C	MET16
YPL038W	MET31	YJR137C	MET5
YPL038W	MET31	YJL212C	OPT1
YPL038W	MET31	YJL210W	PEX2
YPL038W	MET31	YDL059C	RAD59
YPL038W	MET31	RPS29b	RPS29b
YPL038W	MET31	YLR180W	SAM1
YPL038W	MET31	YLR179C	YLR179C
YPL089C	RLM1	YHR142W	CHS7
YPL089C	RLM1	YKL096W	CWP1
YPL089C	RLM1	YMR238W	DFG5
YPL089C	RLM1	YLR300W	EXG1
YPL089C	RLM1	YAL053W	FLC2
YPL089C	RLM1	YJL106W	IME2
YPL089C	RLM1	YKL161C	KDX1
YPL089C	RLM1	YDR001C	NTH1
YPL089C	RLM1	YDR055W	PST1
YPL089C	RLM1	YCR036W	RBK1
YPL089C	RLM1	YPL089C	RLM1
YPL089C	RLM1	YDL140C	RPO21
YPL089C	RLM1	YHR030C	SLT2
YPL089C	RLM1	YKR091W	SRL3
YPL089C	RLM1	YCR073C	SSK22
YPL089C	RLM1	YKL081W	TEF4
YPL089C	RLM1	YKL058W	TOA2
YPL089C	RLM1	YPL088W	YPL088W
YPL177C	CUP9	YKR093W	PTR2
YPL177C	CUP9	YFR005C	SAD1
YPL177C	CUP9	YFR006W	YFR006W
