# Supplementary material for: Dual threshold optimization and network inference reveal convergent evidence from TF binding locations and TF perturbation responses
Source: Genome Res. 2020 Mar;30(3):459–71. doi: 10.1101/gr.259655.119 (PMC7111528; doi:10.1101/gr.259655.119)
Supplement: Supplemental Material [file supp_gr.259655.119_Supplemental_File_S2.xlsx]

## Sheet: README
Supplemental File S2: Network edges from acceptable TFs to their bound and responsive genes after dual threshold optimization on Harbison ChIP and ZEV15 response data.
Column	Description
TF_systematicName	Transcription factor in systematic name
TF_commonName	Transcription factor in common name
Gene_systematicName	Target gene in systematic name
Gene_commonName	Traget gene in common name

## Sheet: Supplemental_File_S2
TF_systematicName	TF_commonName	Gene_systematicName	Gene_commonName
YBR083W	TEC1	YNR044W	AGA1
YBR083W	TEC1	YGL032C	AGA2
YBR083W	TEC1	YDL126C	CDC48
YBR083W	TEC1	YKL096W	CWP1
YBR083W	TEC1	YCL027W	FUS1
YBR083W	TEC1	YBL016W	FUS3
YBR083W	TEC1	YKR061W	KTR2
YBR083W	TEC1	YNL145W	MFA2
YBR083W	TEC1	YGR014W	MSB2
YBR083W	TEC1	YNL053W	MSG5
YBR083W	TEC1	YNL289W	PCL1
YBR083W	TEC1	YDL127W	PCL2
YBR083W	TEC1	YIL119C	RPI1
YBR083W	TEC1	YOR315W	SFG1
YBR083W	TEC1	YJL145W	SFH5
YBR083W	TEC1	YKR091W	SRL3
YBR083W	TEC1	YHR084W	STE12
YBR083W	TEC1	YBR083W	TEC1
YBR083W	TEC1	YEL040W	UTR2
YBR083W	TEC1	YGR039W	YGR039W
YBR083W	TEC1	YLR413W	YLR413W
YBR182C	SMP1	YKL185W	ASH1
YBR182C	SMP1	YHR142W	CHS7
YBR182C	SMP1	YKL096W	CWP1
YBR182C	SMP1	YHR021W-A	ECM12
YBR182C	SMP1	YMR015C	ERG5
YBR182C	SMP1	YLR300W	EXG1
YBR182C	SMP1	YLR047C	FRE8
YBR182C	SMP1	YDR420W	HKR1
YBR182C	SMP1	YGL077C	HNM1
YBR182C	SMP1	YKL164C	PIR1
YBR182C	SMP1	YKL163W	PIR3
YBR182C	SMP1	RPS6b	RPS6b
YBR182C	SMP1	YDR351W	SBE2
YBR182C	SMP1	YPR198W	SGE1
YBR182C	SMP1	YOR137C	SIA1
YBR182C	SMP1	YHR030C	SLT2
YBR182C	SMP1	YBR182C	SMP1
YBR182C	SMP1	YPL175W	SPT14
YBR182C	SMP1	YCR073C	SSK22
YBR182C	SMP1	YEL040W	UTR2
YBR182C	SMP1	YBL111C	YBL111C
YBR182C	SMP1	YBL112C	YBL112C
YBR182C	SMP1	YBL113C	YBL113C
YBR182C	SMP1	YGR035C	YGR035C
YBR182C	SMP1	YHL041W	YHL041W
YBR182C	SMP1	YIL177C	YIL177C
YBR182C	SMP1	YJL225C	YJL225C
YBR182C	SMP1	YLR413W	YLR413W
YBR182C	SMP1	YML133C	YML133C
YBR182C	SMP1	YNL115C	YNL115C
YBR182C	SMP1	YIR039C	YPS6
YBR182C	SMP1	YLR467W	YRF1-5
YBR182C	SMP1	YNL339C	YRF1-6
YBR182C	SMP1	YPL283C	YRF1-7
YDR043C	NRG1	YEL070W	DSF1
YDR043C	NRG1	YDR040C	ENA1
YDR043C	NRG1	YMR319C	FET4
YDR043C	NRG1	YKR102W	FLO10
YDR043C	NRG1	YIL098C	FMC1
YDR043C	NRG1	YLR013W	GAT3
YDR043C	NRG1	YIR013C	GAT4
YDR043C	NRG1	YIL020C	HIS6
YDR043C	NRG1	YOL156W	HXT11
YDR043C	NRG1	YEL069C	HXT13
YDR043C	NRG1	YDL245C	HXT15
YDR043C	NRG1	YJR158W	HXT16
YDR043C	NRG1	YJL219W	HXT9
YDR043C	NRG1	YOL157C	IMA2
YDR043C	NRG1	YDR043C	NRG1
YDR043C	NRG1	YNR070W	PDR18
YDR043C	NRG1	YOR049C	RSB1
YDR043C	NRG1	YDR041W	RSM10
YDR043C	NRG1	YOR140W	SFL1
YDR043C	NRG1	YFL060C	SNO3
YDR043C	NRG1	YJR159W	SOR1
YDR043C	NRG1	YDL246C	SOR2
YDR043C	NRG1	YDR536W	STL1
YDR043C	NRG1	YOR273C	TPO4
YDR043C	NRG1	YPL230W	USV1
YDR043C	NRG1	YEL040W	UTR2
YDR043C	NRG1	YAL064W	YAL064W
YDR043C	NRG1	YDR259C	YAP6
YDR043C	NRG1	YBL029W	YBL029W
YDR043C	NRG1	YDR042C	YDR042C
YDR043C	NRG1	YHL041W	YHL041W
YDR043C	NRG1	YIR014W	YIR014W
YDR043C	NRG1	YLR012C	YLR012C
YDR146C	SWI5	YPL158C	AIM44
YDR146C	SWI5	YBR158W	AMN1
YDR146C	SWI5	YKL185W	ASH1
YDR146C	SWI5	YNL269W	BSC4
YDR146C	SWI5	YGR041W	BUD9
YDR146C	SWI5	YNL192W	CHS1
YDR146C	SWI5	YGR189C	CRH1
YDR146C	SWI5	YDL117W	CYK3
YDR146C	SWI5	YOR264W	DSE3
YDR146C	SWI5	YNL327W	EGT2
YDR146C	SWI5	YLR300W	EXG1
YDR146C	SWI5	YIL009W	FAA3
YDR146C	SWI5	YBR157C	ICS2
YDR146C	SWI5	YNL328C	MDJ2
YDR146C	SWI5	YNL145W	MFA2
YDR146C	SWI5	YKL186C	MTR2
YDR146C	SWI5	YNL078W	NIS1
YDR146C	SWI5	YDL127W	PCL2
YDR146C	SWI5	YDL179W	PCL9
YDR146C	SWI5	YGR086C	PIL1
YDR146C	SWI5	YKL164C	PIR1
YDR146C	SWI5	YDR055W	PST1
YDR146C	SWI5	YJL217W	REE1
YDR146C	SWI5	YLR079W	SIC1
YDR146C	SWI5	YNL032W	SIW14
YDR146C	SWI5	YBR083W	TEC1
YDR146C	SWI5	YPL157W	TGS1
YDR146C	SWI5	YBR071W	YBR071W
YDR146C	SWI5	YDL114W	YDL114W
YDR146C	SWI5	YDL119C	YDL119C
YDR146C	SWI5	YJL160C	YJL160C
YDR146C	SWI5	YLR049C	YLR049C
YDR146C	SWI5	YLR194C	YLR194C
YDR259C	YAP6	YDR525W	API2
YDR259C	YAP6	YPR192W	AQY1
YDR259C	YAP6	YLL052C	AQY2
YDR259C	YAP6	YDL037C	BSC1
YDR259C	YAP6	YNR067C	DSE4
YDR259C	YAP6	YEL070W	DSF1
YDR259C	YAP6	YMR319C	FET4
YDR259C	YAP6	YOR381W	FRE3
YDR259C	YAP6	YIR013C	GAT4
YDR259C	YAP6	YJR158W	HXT16
YDR259C	YAP6	YJL219W	HXT9
YDR259C	YAP6	YBR157C	ICS2
YDR259C	YAP6	YOL157C	IMA2
YDR259C	YAP6	YIL172C	IMA3
YDR259C	YAP6	YJL221C	IMA4
YDR259C	YAP6	YGR238C	KEL2
YDR259C	YAP6	YNL145W	MFA2
YDR259C	YAP6	YER028C	MIG3
YDR259C	YAP6	YNL180C	RHO5
YDR259C	YAP6	YPR065W	ROX1
YDR259C	YAP6	YIL119C	RPI1
YDR259C	YAP6	YLR075W	RPL10
YDR259C	YAP6	YOR049C	RSB1
YDR259C	YAP6	YJL105W	SET4
YDR259C	YAP6	YOR315W	SFG1
YDR259C	YAP6	YJR159W	SOR1
YDR259C	YAP6	YDR259C	YAP6
YDR259C	YAP6	YBL029W	YBL029W
YDR259C	YAP6	YLL053C	YLL053C
YDR259C	YAP6	YMR320W	YMR320W
YDR259C	YAP6	YOR029W	YOR029W
YDR259C	YAP6	YOL154W	ZPS1
YDR310C	SUM1	YJL037W	IRC18
YDR310C	SUM1	YOR255W	OSW1
YDR310C	SUM1	YHR185C	PFS1
YDR310C	SUM1	YPL130W	SPO19
YDR310C	SUM1	YGL170C	SPO74
YDR310C	SUM1	YGR059W	SPR3
YDR310C	SUM1	YCL048W	SPS22
YDR310C	SUM1	YOR313C	SPS4
YDR310C	SUM1	YHR184W	SSP1
YDR310C	SUM1	YDR310C	SUM1
YDR310C	SUM1	YDL186W	YDL186W
YDR310C	SUM1	YJL043W	YJL043W
YDR310C	SUM1	YKR015C	YKR015C
YDR310C	SUM1	YBR148W	YSW1
YDR423C	CAD1	YKL103C	APE1
YDR423C	CAD1	YMR038C	CCS1
YDR423C	CAD1	YKR071C	DRE2
YDR423C	CAD1	YDR036C	EHD3
YDR423C	CAD1	YBR047W	FMP23
YDR423C	CAD1	YEL046C	GLY1
YDR423C	CAD1	YOL119C	MCH4
YDR423C	CAD1	YKL040C	NFU1
YDR423C	CAD1	YGL115W	SNF4
YDR423C	CAD1	YKL086W	SRX1
YDR423C	CAD1	YPR048W	TAH18
YDR423C	CAD1	YDR135C	YCF1
YDR423C	CAD1	YGR234W	YHB1
YDR423C	CAD1	YKL102C	YKL102C
YEL009C	GCN4	YJL200C	ACO2
YEL009C	GCN4	YBR145W	ADH5
YEL009C	GCN4	YER073W	ALD5
YEL009C	GCN4	YOL058W	ARG1
YEL009C	GCN4	YJL071W	ARG2
YEL009C	GCN4	YJL088W	ARG3
YEL009C	GCN4	YHR018C	ARG4
YEL009C	GCN4	YER069W	ARG5,6
YEL009C	GCN4	YMR062C	ARG7
YEL009C	GCN4	YOL140W	ARG8
YEL009C	GCN4	YDR127W	ARO1
YEL009C	GCN4	YDR035W	ARO3
YEL009C	GCN4	YBR249C	ARO4
YEL009C	GCN4	YGL202W	ARO8
YEL009C	GCN4	YJR025C	BNA1
YEL009C	GCN4	YFL028C	CAF16
YEL009C	GCN4	YEL063C	CAN1
YEL009C	GCN4	YHR122W	CIA2
YEL009C	GCN4	YOR303W	CPA1
YEL009C	GCN4	YJR109C	CPA2
YEL009C	GCN4	YPR111W	DBF20
YEL009C	GCN4	YDL198C	GGC1
YEL009C	GCN4	YER055C	HIS1
YEL009C	GCN4	YOR202W	HIS3
YEL009C	GCN4	YCL030C	HIS4
YEL009C	GCN4	YBR248C	HIS7
YEL009C	GCN4	YER052C	HOM3
YEL009C	GCN4	YNL004W	HRB1
YEL009C	GCN4	YER086W	ILV1
YEL009C	GCN4	YJR016C	ILV3
YEL009C	GCN4	YLR355C	ILV5
YEL009C	GCN4	YCL009C	ILV6
YEL009C	GCN4	YFR055W	IRC7
YEL009C	GCN4	YNL104C	LEU4
YEL009C	GCN4	YOR108W	LEU9
YEL009C	GCN4	YBR115C	LYS2
YEL009C	GCN4	YDL182W	LYS20
YEL009C	GCN4	YDL054C	MCH1
YEL009C	GCN4	YOL119C	MCH4
YEL009C	GCN4	YGL125W	MET13
YEL009C	GCN4	YPR167C	MET16
YEL009C	GCN4	YOL064C	MET22
YEL009C	GCN4	YNL103W	MET4
YEL009C	GCN4	YHR162W	MPC2
YEL009C	GCN4	YOR222W	ODC2
YEL009C	GCN4	YOR130C	ORT1
YEL009C	GCN4	YHR071W	PCL5
YEL009C	GCN4	YGL059W	PKP2
YEL009C	GCN4	YPL188W	POS5
YEL009C	GCN4	YJL072C	PSF2
YEL009C	GCN4	YBR218C	PYC2
YEL009C	GCN4	YBR256C	RIB5
YEL009C	GCN4	YMR063W	RIM9
YEL009C	GCN4	YBL103C	RTG3
YEL009C	GCN4	YPL273W	SAM4
YEL009C	GCN4	YNL311C	SKP2
YEL009C	GCN4	YMR095C	SNO1
YEL009C	GCN4	YMR096W	SNZ1
YEL009C	GCN4	YMR019W	STB4
YEL009C	GCN4	YGL184C	STR3
YEL009C	GCN4	YOR337W	TEA1
YEL009C	GCN4	YER090W	TRP2
YEL009C	GCN4	YKL211C	TRP3
YEL009C	GCN4	YDR354W	TRP4
YEL009C	GCN4	YDL170W	UGA3
YEL009C	GCN4	YDL183C	YDL183C
YEL009C	GCN4	YJR111C	YJR111C
YEL009C	GCN4	YPR058W	YMC1
YEL009C	GCN4	YBR104W	YMC2
YEL009C	GCN4	YOR302W	YOR302W
YER040W	GLN3	YPR145W	ASN1
YER040W	GLN3	YPR035W	GLN1
YER040W	GLN3	YDL171C	GLT1
YER040W	GLN3	YDL170W	UGA3
YFL031W	HAC1	YOR198C	BFR1
YFL031W	HAC1	YHR044C	DOG1
YFL031W	HAC1	YML130C	ERO1
YFL031W	HAC1	YDR518W	EUG1
YFL031W	HAC1	YJL091C	GWT1
YFL031W	HAC1	YDR540C	IRC4
YFL031W	HAC1	YJL034W	KAR2
YFL031W	HAC1	YKL165C	MCD4
YFL031W	HAC1	YCL044C	MGR1
YFL031W	HAC1	YOL031C	SIL1
YFL031W	HAC1	YJL035C	TAD2
YGL035C	MIG1	YDR441C	APT2
YGL035C	MIG1	YEL070W	DSF1
YGL035C	MIG1	YPR184W	GDB1
YGL035C	MIG1	YOL156W	HXT11
YGL035C	MIG1	YOL157C	IMA2
YGL035C	MIG1	YJL221C	IMA4
YGL035C	MIG1	YJR159W	SOR1
YGL035C	MIG1	YDL246C	SOR2
YGL035C	MIG1	YCR073C	SSK22
YGL071W	AFT1	YGL071W	AFT1
YGL071W	AFT1	YHL040C	ARN1
YGL071W	AFT1	YLR136C	TIS11
YHL020C	OPI1	YBR029C	CDS1
YHL020C	OPI1	YNL130C	CPT1
YHL020C	OPI1	YDR147W	EKI1
YHL020C	OPI1	YPL231W	FAS2
YHL020C	OPI1	YJL153C	INO1
YHL020C	OPI1	YDR497C	ITR1
YHL020C	OPI1	YNL129W	NRK1
YHL020C	OPI1	YBR030W	RKM3
YHL020C	OPI1	YLL005C	SPO75
YHR084W	STE12	YNR044W	AGA1
YHR084W	STE12	YGL032C	AGA2
YHR084W	STE12	YIL015W	BAR1
YHR084W	STE12	YKL096W	CWP1
YHR084W	STE12	YCL027W	FUS1
YHR084W	STE12	YMR232W	FUS2
YHR084W	STE12	YBL016W	FUS3
YHR084W	STE12	YDR309C	GIC2
YHR084W	STE12	YHR005C	GPA1
YHR084W	STE12	YFL027C	GYP8
YHR084W	STE12	YMR065W	KAR5
YHR084W	STE12	YNL279W	PRM1
YHR084W	STE12	YPL156C	PRM4
YHR084W	STE12	YML047C	PRM6
YHR084W	STE12	YLR452C	SST2
YHR084W	STE12	YHR084W	STE12
YHR084W	STE12	YFL026W	STE2
YHR084W	STE12	YKL209C	STE6
YHR084W	STE12	YBR083W	TEC1
YHR178W	STB5	YDR231C	COX20
YHR178W	STB5	YHR183W	GND1
YHR178W	STB5	YNL274C	GOR1
YHR178W	STB5	YDR232W	HEM1
YHR178W	STB5	YDL049C	KNH1
YHR178W	STB5	YMR272C	SCS7
YHR178W	STB5	YDR011W	SNQ2
YHR178W	STB5	YHR163W	SOL3
YHR178W	STB5	YLR354C	TAL1
YHR178W	STB5	YPR074C	TKL1
YHR178W	STB5	YDR248C	YDR248C
YHR178W	STB5	YEL041W	YEF1
YHR178W	STB5	YLR152C	YLR152C
YHR178W	STB5	YMR315W	YMR315W
YHR206W	SKN7	YFL039C	ACT1
YHR206W	SKN7	YLR109W	AHP1
YHR206W	SKN7	YGR225W	AMA1
YHR206W	SKN7	YDL137W	ARF2
YHR206W	SKN7	YLR110C	CCW12
YHR206W	SKN7	YOR349W	CIN1
YHR206W	SKN7	YJL158C	CIS3
YHR206W	SKN7	YMR199W	CLN1
YHR206W	SKN7	YDR155C	CPR1
YHR206W	SKN7	YGR088W	CTT1
YHR206W	SKN7	YKL096W-A	CWP2
YHR206W	SKN7	YOL052C-A	DDR2
YHR206W	SKN7	YMR173W	DDR48
YHR206W	SKN7	YCL058C	FYV5
YHR206W	SKN7	YMR307W	GAS1
YHR206W	SKN7	YMR136W	GAT2
YHR206W	SKN7	YDR309C	GIC2
YHR206W	SKN7	YPR160W	GPH1
YHR206W	SKN7	YKL109W	HAP4
YHR206W	SKN7	YLR205C	HMX1
YHR206W	SKN7	YMR251W-A	HOR7
YHR206W	SKN7	YBR157C	ICS2
YHR206W	SKN7	YMR195W	ICY1
YHR206W	SKN7	YLR355C	ILV5
YHR206W	SKN7	YDL049C	KNH1
YHR206W	SKN7	YDL182W	LYS20
YHR206W	SKN7	YGR249W	MGA1
YHR206W	SKN7	YKL062W	MSN4
YHR206W	SKN7	YJL116C	NCA3
YHR206W	SKN7	YDR043C	NRG1
YHR206W	SKN7	YJL212C	OPT1
YHR206W	SKN7	YGR086C	PIL1
YHR206W	SKN7	YJL108C	PRM10
YHR206W	SKN7	YKR013W	PRY2
YHR206W	SKN7	YER075C	PTP3
YHR206W	SKN7	YOR348C	PUT4
YHR206W	SKN7	YOR107W	RGS2
YHR206W	SKN7	YPR065W	ROX1
YHR206W	SKN7	YMR305C	SCW10
YHR206W	SKN7	YIL099W	SGA1
YHR206W	SKN7	YDR011W	SNQ2
YHR206W	SKN7	YMR016C	SOK2
YHR206W	SKN7	YMR017W	SPO20
YHR206W	SKN7	YDR536W	STL1
YHR206W	SKN7	YPR151C	SUE1
YHR206W	SKN7	YPR009W	SUT2
YHR206W	SKN7	YBR083W	TEC1
YHR206W	SKN7	YER011W	TIR1
YHR206W	SKN7	YJL048C	UBX6
YHR206W	SKN7	YKR042W	UTH1
YHR206W	SKN7	YAR068W	YAR068W
YHR206W	SKN7	YDR157W	YDR157W
YHR206W	SKN7	YIL060W	YIL060W
YHR206W	SKN7	YJL107C	YJL107C
YHR206W	SKN7	YKL097C	YKL097C
YHR206W	SKN7	YLR108C	YLR108C
YHR206W	SKN7	YLR257W	YLR257W
YHR206W	SKN7	YMR122C	YMR122C
YHR206W	SKN7	YNL144C	YNL144C
YIL131C	FKH1	YBR158W	AMN1
YIL131C	FKH1	YMR198W	CIK1
YIL131C	FKH1	YLR210W	CLB4
YIL131C	FKH1	YDR179C	CSN9
YIL131C	FKH1	YKL096W-A	CWP2
YIL131C	FKH1	YGR092W	DBF2
YIL131C	FKH1	YER124C	DSE1
YIL131C	FKH1	YHR143W	DSE2
YIL131C	FKH1	YBR078W	ECM33
YIL131C	FKH1	YCR075C	ERS1
YIL131C	FKH1	YGR098C	ESP1
YIL131C	FKH1	YER032W	FIR1
YIL131C	FKH1	YMR215W	GAS3
YIL131C	FKH1	YPL116W	HOS3
YIL131C	FKH1	YDR113C	PDS1
YIL131C	FKH1	YDR501W	PLM2
YIL131C	FKH1	YLR209C	PNP1
YIL131C	FKH1	YJL078C	PRY3
YIL131C	FKH1	RLR1	RLR1
YIL131C	FKH1	YJL189W	RPL39
YIL131C	FKH1	YGL028C	SCW11
YIL131C	FKH1	YMR117C	SPC24
YIL131C	FKH1	YGR099W	TEL2
YIL131C	FKH1	YBR138C	YBR138C
YIL131C	FKH1	YDR325W	YCG1
YIL131C	FKH1	YLR272C	YCS4
YIL131C	FKH1	YDR179W-A	YDR179W-A
YIL131C	FKH1	YFR018C	YFR018C
YIL131C	FKH1	YKL069W	YKL069W
YIL131C	FKH1	YMR144W	YMR144W
YIR023W	DAL81	YCL025C	AGP1
YIR023W	DAL81	YPR145W	ASN1
YIR023W	DAL81	YBR068C	BAP2
YIR023W	DAL81	YPL265W	DIP5
YIR023W	DAL81	YLR094C	GIS3
YIR023W	DAL81	YDR508C	GNP1
YIR023W	DAL81	YGR055W	MUP1
YJL056C	ZAP1	YNL254C	RTC4
YJL056C	ZAP1	YJL056C	ZAP1
YJL056C	ZAP1	YGL255W	ZRT1
YJL056C	ZAP1	YLR130C	ZRT2
YJL056C	ZAP1	YKL175W	ZRT3
YJR060W	CBF1	YNL220W	ADE12
YJR060W	CBF1	YLR155C	ASP3-1
YJR060W	CBF1	YKL016C	ATP7
YJR060W	CBF1	YIL088C	AVT7
YJR060W	CBF1	YER114C	BOI2
YJR060W	CBF1	YJR060W	CBF1
YJR060W	CBF1	YGL128C	CWC23
YJR060W	CBF1	YAL012W	CYS3
YJR060W	CBF1	YLL008W	DRS1
YJR060W	CBF1	YAL026C	DRS2
YJR060W	CBF1	YER124C	DSE1
YJR060W	CBF1	YJL167W	ERG20
YJR060W	CBF1	YLR081W	GAL2
YJR060W	CBF1	YDR508C	GNP1
YJR060W	CBF1	YOR038C	HIR2
YJR060W	CBF1	YNL037C	IDH1
YJR060W	CBF1	YIR034C	LYS1
YJR060W	CBF1	YFR030W	MET10
YJR060W	CBF1	YNL277W	MET2
YJR060W	CBF1	YJR010W	MET3
YJR060W	CBF1	YNL103W	MET4
YJR060W	CBF1	YHL004W	MRP4
YJR060W	CBF1	YJL133W	MRS3
YJR060W	CBF1	YCR092C	MSH3
YJR060W	CBF1	YJL116C	NCA3
YJR060W	CBF1	YNL036W	NCE103
YJR060W	CBF1	NHP6b	NHP6b
YJR060W	CBF1	YOR098C	NUP1
YJR060W	CBF1	YOR328W	PDR10
YJR060W	CBF1	YOL136C	PFK27
YJR060W	CBF1	YNL282W	POP3
YJR060W	CBF1	YKL015W	PUT3
YJR060W	CBF1	YDL059C	RAD59
YJR060W	CBF1	YEL024W	RIP1
YJR060W	CBF1	YDL020C	RPN4
YJR060W	CBF1	YER125W	RSP5
YJR060W	CBF1	YGL126W	SCS3
YJR060W	CBF1	YIL074C	SER33
YJR060W	CBF1	YJR095W	SFC1
YJR060W	CBF1	YLR139C	SLS1
YJR060W	CBF1	YGL127C	SOH1
YJR060W	CBF1	YBR250W	SPO23
YJR060W	CBF1	YIL126W	STH1
YJR060W	CBF1	YLR092W	SUL2
YJR060W	CBF1	YDR297W	SUR2
YJR060W	CBF1	YJR009C	TDH2
YJR060W	CBF1	YBR091C	TIM12
YJR060W	CBF1	YHR099W	TRA1
YJR060W	CBF1	YNL283C	WSC2
YJR060W	CBF1	YLL055W	YCT1
YJR060W	CBF1	YJR120W	YJR120W
YJR060W	CBF1	YLR149C	YLR149C
YJR060W	CBF1	YLR156W	YLR156W
YJR060W	CBF1	YMR196W	YMR196W
YJR060W	CBF1	YOR064C	YNG1
YJR060W	CBF1	YNL095C	YNL095C
YJR060W	CBF1	YPL068C	YPL068C
YKL038W	RGT1	YHR094C	HXT1
YKL038W	RGT1	YGL209W	MIG2
YKL038W	RGT1	YER028C	MIG3
YKL038W	RGT1	YKR075C	YKR075C
YKL043W	PHD1	YER045C	ACA1
YKL043W	PHD1	YPL177C	CUP9
YKL043W	PHD1	YEL039C	CYC7
YKL043W	PHD1	YPL265W	DIP5
YKL043W	PHD1	YMR136W	GAT2
YKL043W	PHD1	YCR098C	GIT1
YKL043W	PHD1	YHR005C	GPA1
YKL043W	PHD1	YEL069C	HXT13
YKL043W	PHD1	YDL245C	HXT15
YKL043W	PHD1	YJR158W	HXT16
YKL043W	PHD1	YMR011W	HXT2
YKL043W	PHD1	YBR157C	ICS2
YKL043W	PHD1	YNL145W	MFA2
YKL043W	PHD1	YGR249W	MGA1
YKL043W	PHD1	YKL062W	MSN4
YKL043W	PHD1	YHR170W	NMD3
YKL043W	PHD1	YOR107W	RGS2
YKL043W	PHD1	YMR016C	SOK2
YKL043W	PHD1	YJR159W	SOR1
YKL043W	PHD1	YMR017W	SPO20
YKL043W	PHD1	YAL064W	YAL064W
YKL043W	PHD1	YBL029W	YBL029W
YKL043W	PHD1	YEL076C-A	YEL076C-A
YKL043W	PHD1	YHR213W	YHR213W
YKL043W	PHD1	YMR018W	YMR018W
YKL043W	PHD1	YPR202W	YPR202W
YKL043W	PHD1	ZMS1	ZMS1
YKL043W	PHD1	YER033C	ZRG8
YKL109W	HAP4	YBL099W	ATP1
YKL109W	HAP4	YLR295C	ATP14
YKL109W	HAP4	YPL271W	ATP15
YKL109W	HAP4	YDL004W	ATP16
YKL109W	HAP4	YDR377W	ATP17
YKL109W	HAP4	YJR121W	ATP2
YKL109W	HAP4	YPR020W	ATP20
YKL109W	HAP4	YBR039W	ATP3
YKL109W	HAP4	YDR298C	ATP5
YKL109W	HAP4	YKL016C	ATP7
YKL109W	HAP4	YBL045C	COR1
YKL109W	HAP4	YLR038C	COX12
YKL109W	HAP4	YGL191W	COX13
YKL109W	HAP4	YGL187C	COX4
YKL109W	HAP4	COX5a	COX5a
YKL109W	HAP4	YHR051W	COX6
YKL109W	HAP4	YMR256C	COX7
YKL109W	HAP4	YLR395C	COX8
YKL109W	HAP4	YDL067C	COX9
YKL109W	HAP4	YOR065W	CYT1
YKL109W	HAP4	YDL181W	INH1
YKL109W	HAP4	YDR148C	KGD2
YKL109W	HAP4	YJR077C	MIR1
YKL109W	HAP4	YML120C	NDI1
YKL109W	HAP4	YBL030C	PET9
YKL109W	HAP4	YHR001W-A	QCR10
YKL109W	HAP4	YPR191W	QCR2
YKL109W	HAP4	YFR033C	QCR6
YKL109W	HAP4	YDR529C	QCR7
YKL109W	HAP4	YGR183C	QCR9
YKL109W	HAP4	YEL024W	RIP1
YKL109W	HAP4	YPR190C	RPC82
YKL109W	HAP4	YML091C	RPM2
YKL109W	HAP4	YKL148C	SDH1
YKL109W	HAP4	YOR187W	TUF1
YKL109W	HAP4	YLR168C	UPS2
YLR131C	ACE2	YBR158W	AMN1
YLR131C	ACE2	YGR041W	BUD9
YLR131C	ACE2	YLR286C	CTS1
YLR131C	ACE2	YER124C	DSE1
YLR131C	ACE2	YHR143W	DSE2
YLR131C	ACE2	YNL327W	EGT2
YLR131C	ACE2	YJR147W	HMS2
YLR131C	ACE2	YNL328C	MDJ2
YLR131C	ACE2	YJL078C	PRY3
YLR131C	ACE2	YGL028C	SCW11
YLR176C	RFX1	YMR177W	MMT1
YLR176C	RFX1	YOR269W	PAC1
YLR176C	RFX1	YJL026W	RNR2
YLR176C	RFX1	YIL066C	RNR3
YLR176C	RFX1	YGR180C	RNR4
YLR176C	RFX1	YLR034C	SMF3
YLR176C	RFX1	YDL129W	YDL129W
YLR176C	RFX1	YMR279C	YMR279C
YLR176C	RFX1	YOR268C	YOR268C
YLR176C	RFX1	YOR378W	YOR378W
YLR228C	ECM22	YDL243C	AAD4
YLR228C	ECM22	YLR027C	AAT2
YLR228C	ECM22	YER045C	ACA1
YLR228C	ECM22	YLR304C	ACO1
YLR228C	ECM22	YAL054C	ACS1
YLR228C	ECM22	YLR028C	ADE16
YLR228C	ECM22	YGL234W	ADE5,7
YLR228C	ECM22	YER017C	AFG3
YLR228C	ECM22	YBR132C	AGP2
YLR228C	ECM22	YFL030W	AGX1
YLR228C	ECM22	YOR023C	AHC1
YLR228C	ECM22	YHL021C	AIM17
YLR228C	ECM22	YHR198C	AIM18
YLR228C	ECM22	YJR080C	AIM24
YLR228C	ECM22	YKL037W	AIM26
YLR228C	ECM22	YBR108W	AIM3
YLR228C	ECM22	YGL047W	ALG13
YLR228C	ECM22	YJR047C	ANB1
YLR228C	ECM22	YDR525W	API2
YLR228C	ECM22	YHL019C	APM2
YLR228C	ECM22	YBR288C	APM3
YLR228C	ECM22	YDR441C	APT2
YLR228C	ECM22	YNL065W	AQR1
YLR228C	ECM22	YLR370C	ARC18
YLR228C	ECM22	YNR035C	ARC35
YLR228C	ECM22	YGL148W	ARO2
YLR228C	ECM22	YIL130W	ASG1
YLR228C	ECM22	YGR124W	ASN2
YLR228C	ECM22	YNR002C	ATO2
YLR228C	ECM22	YNL315C	ATP11
YLR228C	ECM22	YIL088C	AVT7
YLR228C	ECM22	YOR113W	AZF1
YLR228C	ECM22	YAL061W	BDH2
YLR228C	ECM22	YER177W	BMH1
YLR228C	ECM22	YER114C	BOI2
YLR228C	ECM22	YBR290W	BSD2
YLR228C	ECM22	YMR055C	BUB2
YLR228C	ECM22	YCR063W	BUD31
YLR228C	ECM22	YOR299W	BUD7
YLR228C	ECM22	YDL099W	BUG1
YLR228C	ECM22	YNL305C	BXI1
YLR228C	ECM22	YML102W	CAC2
YLR228C	ECM22	YNL161W	CBK1
YLR228C	ECM22	YKR066C	CCP1
YLR228C	ECM22	YIL142W	CCT2
YLR228C	ECM22	YLR110C	CCW12
YLR228C	ECM22	YJR076C	CDC11
YLR228C	ECM22	YFR036W	CDC26
YLR228C	ECM22	YDL126C	CDC48
YLR228C	ECM22	YGL206C	CHC1
YLR228C	ECM22	YHR142W	CHS7
YLR228C	ECM22	YOR039W	CKB2
YLR228C	ECM22	YLR117C	CLF1
YLR228C	ECM22	YKL190W	CNB1
YLR228C	ECM22	YGL005C	COG7
YLR228C	ECM22	YML071C	COG8
YLR228C	ECM22	YDL145C	COP1
YLR228C	ECM22	YNR041C	COQ2
YLR228C	ECM22	YDR231C	COX20
YLR228C	ECM22	YHR116W	COX23
YLR228C	ECM22	YDR256C	CTA1
YLR228C	ECM22	YBR291C	CTP1
YLR228C	ECM22	YGR088W	CTT1
YLR228C	ECM22	YGL128C	CWC23
YLR228C	ECM22	YJR048W	CYC1
YLR228C	ECM22	YAL012W	CYS3
YLR228C	ECM22	YDR016C	DAD1
YLR228C	ECM22	YNL314W	DAL82
YLR228C	ECM22	YNR038W	DBP6
YLR228C	ECM22	YAL013W	DEP1
YLR228C	ECM22	YNL116W	DMA2
YLR228C	ECM22	YLL001W	DNM1
YLR228C	ECM22	YKL213C	DOA1
YLR228C	ECM22	YGL240W	DOC1
YLR228C	ECM22	YKL204W	EAP1
YLR228C	ECM22	YGL222C	EDC1
YLR228C	ECM22	YCL045C	EMC1
YLR228C	ECM22	YLR206W	ENT2
YLR228C	ECM22	YGR060W	ERG25
YLR228C	ECM22	YLR056W	ERG3
YLR228C	ECM22	YGL012W	ERG4
YLR228C	ECM22	YHR190W	ERG9
YLR228C	ECM22	YCR075C	ERS1
YLR228C	ECM22	YGR284C	ERV29
YLR228C	ECM22	YER015W	FAA2
YLR228C	ECM22	YKL060C	FBA1
YLR228C	ECM22	YLR377C	FBP1
YLR228C	ECM22	YDR339C	FCF1
YLR228C	ECM22	YNL325C	FIG4
YLR228C	ECM22	YIL065C	FIS1
YLR228C	ECM22	YDR534C	FIT1
YLR228C	ECM22	YOR383C	FIT3
YLR228C	ECM22	YIL131C	FKH1
YLR228C	ECM22	YAL053W	FLC2
YLR228C	ECM22	FLD1	FLD1
YLR228C	ECM22	YIL134W	FLX1
YLR228C	ECM22	YER004W	FMP52
YLR228C	ECM22	YOR384W	FRE5
YLR228C	ECM22	YOR271C	FSF1
YLR228C	ECM22	YAL008W	FUN14
YLR228C	ECM22	YBR020W	GAL1
YLR228C	ECM22	YBR019C	GAL10
YLR228C	ECM22	YDR009W	GAL3
YLR228C	ECM22	YPL248C	GAL4
YLR228C	ECM22	YDR211W	GCD6
YLR228C	ECM22	YER163C	GCG1
YLR228C	ECM22	YAL044C	GCV3
YLR228C	ECM22	YDL100C	GET3
YLR228C	ECM22	YER040W	GLN3
YLR228C	ECM22	YHR183W	GND1
YLR228C	ECM22	YER020W	GPA2
YLR228C	ECM22	YAL056W	GPB2
YLR228C	ECM22	YPR160W	GPH1
YLR228C	ECM22	YHR188C	GPI16
YLR228C	ECM22	YDR331W	GPI8
YLR228C	ECM22	YKR067W	GPT2
YLR228C	ECM22	YJL103C	GSM1
YLR228C	ECM22	YMR217W	GUA1
YLR228C	ECM22	YIL155C	GUT2
YLR228C	ECM22	YJL110C	GZF3
YLR228C	ECM22	YPR008W	HAA1
YLR228C	ECM22	YGL237C	HAP2
YLR228C	ECM22	YBL021C	HAP3
YLR228C	ECM22	YCR065W	HCM1
YLR228C	ECM22	YDR232W	HEM1
YLR228C	ECM22	YLR205C	HMX1
YLR228C	ECM22	YOL155C	HPF1
YLR228C	ECM22	YFL014W	HSP12
YLR228C	ECM22	YOR025W	HST3
YLR228C	ECM22	YER039C	HVG1
YLR228C	ECM22	YEL034W	HYP2
YLR228C	ECM22	YIL090W	ICE2
YLR228C	ECM22	YJL077C	ICS3
YLR228C	ECM22	YCR046C	IMG1
YLR228C	ECM22	YBR107C	IML3
YLR228C	ECM22	YMR035W	IMP2
YLR228C	ECM22	YGL150C	INO80
YLR228C	ECM22	YLR095C	IOC2
YLR228C	ECM22	YMR073C	IRC21
YLR228C	ECM22	YDR540C	IRC4
YLR228C	ECM22	YLL027W	ISA1
YLR228C	ECM22	YER019W	ISC1
YLR228C	ECM22	YER180C	ISC10
YLR228C	ECM22	YLR023C	IZH3
YLR228C	ECM22	YDR475C	JIP4
YLR228C	ECM22	YGL241W	KAP114
YLR228C	ECM22	YJL034W	KAR2
YLR228C	ECM22	YLR096W	KIN2
YLR228C	ECM22	YCR091W	KIN82
YLR228C	ECM22	YOR084W	LPX1
YLR228C	ECM22	YGL099W	LSG1
YLR228C	ECM22	YPL004C	LSP1
YLR228C	ECM22	YIL094C	LYS12
YLR228C	ECM22	YCR020C-A	MAK31
YLR228C	ECM22	YNL307C	MCK1
YLR228C	ECM22	YEL032W	MCM3
YLR228C	ECM22	YKL085W	MDH1
YLR228C	ECM22	YAL010C	MDM10
YLR228C	ECM22	YGL197W	MDS3
YLR228C	ECM22	YBR136W	MEC1
YLR228C	ECM22	YJL102W	MEF2
YLR228C	ECM22	YKR007W	MEH1
YLR228C	ECM22	YOR351C	MEK1
YLR228C	ECM22	YGL089C	MF(ALPHA)2
YLR228C	ECM22	YPL098C	MGR2
YLR228C	ECM22	YNL074C	MLF3
YLR228C	ECM22	YGL143C	MRF1
YLR228C	ECM22	YDL079C	MRK1
YLR228C	ECM22	YPL173W	MRPL40
YLR228C	ECM22	YNR036C	MRPS12
YLR228C	ECM22	YNL306W	MRPS18
YLR228C	ECM22	YOR370C	MRS6
YLR228C	ECM22	YNL073W	MSK1
YLR228C	ECM22	YPL097W	MSY1
YLR228C	ECM22	YEL033W	MTC7
YLR228C	ECM22	YGL236C	MTO1
YLR228C	ECM22	YNR043W	MVD1
YLR228C	ECM22	YER042W	MXR1
YLR228C	ECM22	YLR382C	NAM2
YLR228C	ECM22	YPR155C	NCA2
YLR228C	ECM22	YHR042W	NCP1
YLR228C	ECM22	YGL211W	NCS6
YLR228C	ECM22	YML031W	NDC1
YLR228C	ECM22	YDL085W	NDE2
YLR228C	ECM22	YJL076W	NET1
YLR228C	ECM22	YPR052C	NHP6A
YLR228C	ECM22	YPL174C	NIP100
YLR228C	ECM22	YIL164C	NIT1
YLR228C	ECM22	YOR071C	NRT1
YLR228C	ECM22	YHR133C	NSG1
YLR228C	ECM22	YBL079W	NUP170
YLR228C	ECM22	YJL039C	NUP192
YLR228C	ECM22	YMR153W	NUP53
YLR228C	ECM22	YDL116W	NUP84
YLR228C	ECM22	YGL151W	NUT1
YLR228C	ECM22	YGR179C	OKP1
YLR228C	ECM22	YBR230C	OM14
YLR228C	ECM22	YIL136W	OM45
YLR228C	ECM22	YPR075C	OPY2
YLR228C	ECM22	YGR038W	ORM1
YLR228C	ECM22	YOR085W	OST3
YLR228C	ECM22	YER154W	OXA1
YLR228C	ECM22	YMR165C	PAH1
YLR228C	ECM22	YCR077C	PAT1
YLR228C	ECM22	YHL046C	PAU13
YLR228C	ECM22	YER178W	PDA1
YLR228C	ECM22	YGL013C	PDR1
YLR228C	ECM22	YOR328W	PDR10
YLR228C	ECM22	YBL080C	PET112
YLR228C	ECM22	YER153C	PET122
YLR228C	ECM22	YNR045W	PET494
YLR228C	ECM22	YKL197C	PEX1
YLR228C	ECM22	YJL210W	PEX2
YLR228C	ECM22	YDR329C	PEX3
YLR228C	ECM22	YNL149C	PGA2
YLR228C	ECM22	YBL022C	PIM1
YLR228C	ECM22	YDR276C	PMP3
YLR228C	ECM22	YDL095W	PMT1
YLR228C	ECM22	YNL102W	POL1
YLR228C	ECM22	YLL023C	POM33
YLR228C	ECM22	YNL055C	POR1
YLR228C	ECM22	YGL205W	POX1
YLR228C	ECM22	YDR435C	PPM1
YLR228C	ECM22	YDR452W	PPN1
YLR228C	ECM22	YPL179W	PPQ1
YLR228C	ECM22	YGR123C	PPT1
YLR228C	ECM22	YEL060C	PRB1
YLR228C	ECM22	YFR050C	PRE4
YLR228C	ECM22	YKL045W	PRI2
YLR228C	ECM22	YJL079C	PRY1
YLR228C	ECM22	YMR308C	PSE1
YLR228C	ECM22	YCR079W	PTC6
YLR228C	ECM22	YHR189W	PTH1
YLR228C	ECM22	YFR029W	PTR3
YLR228C	ECM22	YNL016W	PUB1
YLR228C	ECM22	YER094C	PUP3
YLR228C	ECM22	YER095W	RAD51
YLR228C	ECM22	YGL163C	RAD54
YLR228C	ECM22	YOR301W	RAX1
YLR228C	ECM22	YPL246C	RBD2
YLR228C	ECM22	YOR380W	RDR1
YLR228C	ECM22	YBR267W	REI1
YLR228C	ECM22	YBL020W	RFT1
YLR228C	ECM22	YLR073C	RFU1
YLR228C	ECM22	YBR260C	RGD1
YLR228C	ECM22	YMR235C	RNA1
YLR228C	ECM22	YNL072W	RNH201
YLR228C	ECM22	YLR371W	ROM2
YLR228C	ECM22	YOL005C	RPB11
YLR228C	ECM22	YJL140W	RPB4
YLR228C	ECM22	YNL330C	RPD3
YLR228C	ECM22	YHR088W	RPF1
YLR228C	ECM22	YIL119C	RPI1
YLR228C	ECM22	RPL17a	RPL17a
YLR228C	ECM22	RPL21b	RPL21b
YLR228C	ECM22	RPL27b	RPL27b
YLR228C	ECM22	RPL31b	RPL31b
YLR228C	ECM22	RPL34a	RPL34a
YLR228C	ECM22	RPL42b	RPL42b
YLR228C	ECM22	RPL4a	RPL4a
YLR228C	ECM22	RPL8a	RPL8a
YLR228C	ECM22	YDL147W	RPN5
YLR228C	ECM22	YDL097C	RPN6
YLR228C	ECM22	RPP1a	RPP1a
YLR228C	ECM22	RPS23a	RPS23a
YLR228C	ECM22	YGL048C	RPT6
YLR228C	ECM22	YCR045C	RRT12
YLR228C	ECM22	YFR032C	RRT5
YLR228C	ECM22	YCR072C	RSA4
YLR228C	ECM22	YHR056C	RSC30
YLR228C	ECM22	YFR037C	RSC8
YLR228C	ECM22	YNR037C	RSM19
YLR228C	ECM22	YMR266W	RSN1
YLR228C	ECM22	YHR087W	RTC3
YLR228C	ECM22	YKL212W	SAC1
YLR228C	ECM22	YDR129C	SAC6
YLR228C	ECM22	YER019C-A	SBH2
YLR228C	ECM22	YHL034C	SBP1
YLR228C	ECM22	YOR329C	SCD5
YLR228C	ECM22	YGL126W	SCS3
YLR228C	ECM22	YDR178W	SDH4
YLR228C	ECM22	YPR181C	SEC23
YLR228C	ECM22	YML105C	SEC65
YLR228C	ECM22	YMR086W	SEG1
YLR228C	ECM22	YJL105W	SET4
YLR228C	ECM22	YLR403W	SFP1
YLR228C	ECM22	YIL099W	SGA1
YLR228C	ECM22	YJR134C	SGM1
YLR228C	ECM22	YBR263W	SHM1
YLR228C	ECM22	YLR058C	SHM2
YLR228C	ECM22	YOL004W	SIN3
YLR228C	ECM22	YMR216C	SKY1
YLR228C	ECM22	YGR212W	SLI1
YLR228C	ECM22	YOR195W	SLK19
YLR228C	ECM22	YIL105C	SLM1
YLR228C	ECM22	YDL033C	SLM3
YLR228C	ECM22	YLR383W	SMC6
YLR228C	ECM22	YLR034C	SMF3
YLR228C	ECM22	YPR182W	SMX3
YLR228C	ECM22	YDL123W	SNA4
YLR228C	ECM22	YOR327C	SNC2
YLR228C	ECM22	YDR477W	SNF1
YLR228C	ECM22	YBR289W	SNF5
YLR228C	ECM22	YEL026W	SNU13
YLR228C	ECM22	YJL036W	SNX4
YLR228C	ECM22	YGL127C	SOH1
YLR228C	ECM22	YHR163W	SOL3
YLR228C	ECM22	YDR201W	SPC19
YLR228C	ECM22	YER018C	SPC25
YLR228C	ECM22	YAL047C	SPC72
YLR228C	ECM22	YAL009W	SPO7
YLR228C	ECM22	YBR081C	SPT7
YLR228C	ECM22	YLR055C	SPT8
YLR228C	ECM22	YHR041C	SRB2
YLR228C	ECM22	YIL143C	SSL2
YLR228C	ECM22	YHR184W	SSP1
YLR228C	ECM22	YDR410C	STE14
YLR228C	ECM22	YLR092W	SUL2
YLR228C	ECM22	YAR042W	SWH1
YLR228C	ECM22	YAL014C	SYN8
YLR228C	ECM22	YBR261C	TAE1
YLR228C	ECM22	YOR352W	TFB6
YLR228C	ECM22	YBR123C	TFC1
YLR228C	ECM22	YOR110W	TFC7
YLR228C	ECM22	YDR058C	TGL2
YLR228C	ECM22	YDL080C	THI3
YLR228C	ECM22	YIL022W	TIM44
YLR228C	ECM22	YJL054W	TIM54
YLR228C	ECM22	YJR135W-A	TIM8
YLR228C	ECM22	YPR074C	TKL1
YLR228C	ECM22	YIL137C	TMA108
YLR228C	ECM22	YGR260W	TNA1
YLR228C	ECM22	YOR194C	TOA1
YLR228C	ECM22	YHR117W	TOM71
YLR228C	ECM22	YKL166C	TPK3
YLR228C	ECM22	YKR050W	TRK2
YLR228C	ECM22	YMR022W	UBC7
YLR228C	ECM22	YDR330W	UBX5
YLR228C	ECM22	YKL035W	UGP1
YLR228C	ECM22	YLR193C	UPS1
YLR228C	ECM22	YPR152C	URN1
YLR228C	ECM22	YPL230W	USV1
YLR228C	ECM22	YGR090W	UTP22
YLR228C	ECM22	YIL091C	UTP25
YLR228C	ECM22	YDR398W	UTP5
YLR228C	ECM22	YEL035C	UTR5
YLR228C	ECM22	YER128W	VFA1
YLR228C	ECM22	YJL154C	VPS35
YLR228C	ECM22	YDR200C	VPS64
YLR228C	ECM22	YHR134W	WSS1
YLR228C	ECM22	YIL101C	XBP1
YLR228C	ECM22	YJL141C	YAK1
YLR228C	ECM22	YAR066W	YAR066W
YLR228C	ECM22	YAR068W	YAR068W
YLR228C	ECM22	YBR056W	YBR056W
YLR228C	ECM22	YHR135C	YCK1
YLR228C	ECM22	YDL242W	YDL242W
YLR228C	ECM22	YDR366C	YDR366C
YLR228C	ECM22	YDR476C	YDR476C
YLR228C	ECM22	YER137C	YER137C
YLR228C	ECM22	YER152C	YER152C
YLR228C	ECM22	YER187W	YER187W
YLR228C	ECM22	YFL015C	YFL015C
YLR228C	ECM22	YFL066C	YFL066C
YLR228C	ECM22	YFL067W	YFL067W
YLR228C	ECM22	YFR016C	YFR016C
YLR228C	ECM22	YGL081W	YGL081W
YLR228C	ECM22	YGL088W	YGL088W
YLR228C	ECM22	YGR117C	YGR117C
YLR228C	ECM22	YGR273C	YGR273C
YLR228C	ECM22	YHL018W	YHL018W
YLR228C	ECM22	YHL026C	YHL026C
YLR228C	ECM22	YHL050C	YHL050C
YLR228C	ECM22	YDR451C	YHP1
YLR228C	ECM22	YHR033W	YHR033W
YLR228C	ECM22	YIL152W	YIL152W
YLR228C	ECM22	YIL165C	YIL165C
YLR228C	ECM22	YIR007W	YIR007W
YLR228C	ECM22	YJL055W	YJL055W
YLR228C	ECM22	YJL206C	YJL206C
YLR228C	ECM22	YJR015W	YJR015W
YLR228C	ECM22	YIL023C	YKE4
YLR228C	ECM22	YKL107W	YKL107W
YLR228C	ECM22	YKR005C	YKR005C
YLR228C	ECM22	YLR122C	YLR122C
YLR228C	ECM22	YLR161W	YLR161W
YLR228C	ECM22	YLR162W	YLR162W
YLR228C	ECM22	YLR297W	YLR297W
YLR228C	ECM22	YLR407W	YLR407W
YLR228C	ECM22	YLR422W	YLR422W
YLR228C	ECM22	YMR034C	YMR034C
YLR228C	ECM22	YMR321C	YMR321C
YLR228C	ECM22	YNL033W	YNL033W
YLR228C	ECM22	YNL035C	YNL035C
YLR228C	ECM22	YNL208W	YNL208W
YLR228C	ECM22	YML027W	YOX1
YLR228C	ECM22	YPL245W	YPL245W
YLR228C	ECM22	YPL260W	YPL260W
YLR228C	ECM22	YPR053C	YPR053C
YLR228C	ECM22	YDR368W	YPR1
YLR228C	ECM22	YPR114W	YPR114W
YLR228C	ECM22	YPR117W	YPR117W
YLR228C	ECM22	YPR153W	YPR153W
YLR228C	ECM22	YPR204W	YPR204W
YLR228C	ECM22	YNL304W	YPT11
YLR228C	ECM22	YER031C	YPT31
YLR228C	ECM22	YDR381W	YRA1
YLR228C	ECM22	YKR053C	YSR3
YLR228C	ECM22	YOR272W	YTM1
YLR228C	ECM22	YJL056C	ZAP1
YLR228C	ECM22	YNR039C	ZRG17
YLR256W	HAP1	YLR153C	ACS2
YLR256W	HAP1	YNR019W	ARE2
YLR256W	HAP1	YER141W	COX15
YLR256W	HAP1	YML054C	CYB2
YLR256W	HAP1	YNL111C	CYB5
YLR256W	HAP1	YJR048W	CYC1
YLR256W	HAP1	YPL028W	ERG10
YLR256W	HAP1	YHR007C	ERG11
YLR256W	HAP1	YML126C	ERG13
YLR256W	HAP1	YMR202W	ERG2
YLR256W	HAP1	YGR060W	ERG25
YLR256W	HAP1	YER044C	ERG28
YLR256W	HAP1	YMR015C	ERG5
YLR256W	HAP1	YLR214W	FRE1
YLR256W	HAP1	YLR256W	HAP1
YLR256W	HAP1	YML075C	HMG1
YLR256W	HAP1	YLR205C	HMX1
YLR256W	HAP1	YEL034W	HYP2
YLR256W	HAP1	YEL033W	MTC7
YLR256W	HAP1	YNR043W	MVD1
YLR256W	HAP1	YMR145C	NDE1
YLR256W	HAP1	YGL055W	OLE1
YLR256W	HAP1	YOR348C	PUT4
YLR256W	HAP1	YEL024W	RIP1
YLR256W	HAP1	YGR049W	SCM4
YLR256W	HAP1	YPR151C	SUE1
YLR256W	HAP1	YJL048C	UBX6
YLR256W	HAP1	YGR234W	YHB1
YLR451W	LEU3	YBR068C	BAP2
YLR451W	LEU3	YHR208W	BAT1
YLR451W	LEU3	YOR271C	FSF1
YLR451W	LEU3	YMR108W	ILV2
YLR451W	LEU3	YGL009C	LEU1
YLR451W	LEU3	YKL120W	OAC1
YLR451W	LEU3	YHR207C	SET5
YML027W	YOX1	YJL194W	CDC6
YML027W	YOX1	YDR191W	HST4
YML027W	YOX1	YLR274W	MCM5
YML027W	YOX1	YBR202W	MCM7
YML027W	YOX1	YNL145W	MFA2
YML027W	YOX1	YOR066W	MSA1
YML027W	YOX1	YLR273C	PIG1
YML099C	ARG81	YBL074C	AAR2
YML099C	ARG81	YML099C	ARG81
YML099C	ARG81	YPL265W	DIP5
YML099C	ARG81	YHR179W	OYE2
YML099C	ARG81	YOL141W	PPM2
YML099C	ARG81	YPL130W	SPO19
YML099C	ARG81	YDR522C	SPS2
YMR016C	SOK2	YER045C	ACA1
YMR016C	SOK2	YLL052C	AQY2
YMR016C	SOK2	YDL037C	BSC1
YMR016C	SOK2	YGR108W	CLB1
YMR016C	SOK2	YPR013C	CMR3
YMR016C	SOK2	YDR446W	ECM11
YMR016C	SOK2	YBL043W	ECM13
YMR016C	SOK2	YMR319C	FET4
YMR016C	SOK2	YMR136W	GAT2
YMR016C	SOK2	YCR098C	GIT1
YMR016C	SOK2	YOL156W	HXT11
YMR016C	SOK2	YEL069C	HXT13
YMR016C	SOK2	YDL245C	HXT15
YMR016C	SOK2	YDR343C	HXT6
YMR016C	SOK2	YJR094C	IME1
YMR016C	SOK2	YGR249W	MGA1
YMR016C	SOK2	YGL158W	RCK1
YMR016C	SOK2	YIL119C	RPI1
YMR016C	SOK2	YJR159W	SOR1
YMR016C	SOK2	YDL246C	SOR2
YMR016C	SOK2	YMR017W	SPO20
YMR016C	SOK2	YFL026W	STE2
YMR016C	SOK2	YLR237W	THI7
YMR016C	SOK2	YGL096W	TOS8
YMR016C	SOK2	YDR259C	YAP6
YMR016C	SOK2	YBL029W	YBL029W
YMR016C	SOK2	YER158C	YER158C
YMR016C	SOK2	YLL053C	YLL053C
YMR016C	SOK2	YLR413W	YLR413W
YMR016C	SOK2	YER033C	ZRG8
YMR021C	MAC1	YLR213C	CRR1
YMR021C	MAC1	YPR124W	CTR1
YMR021C	MAC1	YPL177C	CUP9
YMR021C	MAC1	YMR319C	FET4
YMR021C	MAC1	YLR214W	FRE1
YMR021C	MAC1	YOL152W	FRE7
YMR021C	MAC1	YJR050W	ISY1
YMR021C	MAC1	YGR136W	LSB1
YMR021C	MAC1	YBR297W	MAL33
YMR021C	MAC1	YER001W	MNN1
YMR021C	MAC1	YJL217W	REE1
YMR021C	MAC1	YJR049C	UTR1
YMR021C	MAC1	YNL034W	YNL034W
YMR042W	ARG80	YBL074C	AAR2
YMR042W	ARG80	YOL058W	ARG1
YMR042W	ARG80	YJL088W	ARG3
YMR042W	ARG80	YER069W	ARG5,6
YMR042W	ARG80	YOL140W	ARG8
YMR042W	ARG80	YLR302C	YLR302C
YMR042W	ARG80	YOR302W	YOR302W
YNL103W	MET4	YAL012W	CYS3
YNL103W	MET4	YFR030W	MET10
YNL103W	MET4	YKL001C	MET14
YNL103W	MET4	YNL277W	MET2
YNL103W	MET4	YIR017C	MET28
YNL103W	MET4	YGR055W	MUP1
YNL103W	MET4	YJL212C	OPT1
YNL103W	MET4	YLR180W	SAM1
YNL103W	MET4	YLR092W	SUL2
YNL167C	SKO1	YPL061W	ALD6
YNL167C	SKO1	YEL036C	ANP1
YNL167C	SKO1	YPR192W	AQY1
YNL167C	SKO1	YOR028C	CIN5
YNL167C	SKO1	YPR013C	CMR3
YNL167C	SKO1	YKL096W	CWP1
YNL167C	SKO1	YBL043W	ECM13
YNL167C	SKO1	YDR147W	EKI1
YNL167C	SKO1	FMP43	FMP43
YNL167C	SKO1	YGR052W	FMP48
YNL167C	SKO1	YHR049W	FSH1
YNL167C	SKO1	YOL151W	GRE2
YNL167C	SKO1	YPR005C	HAL1
YNL167C	SKO1	YOL156W	HXT11
YNL167C	SKO1	YEL069C	HXT13
YNL167C	SKO1	YHR096C	HXT5
YNL167C	SKO1	YDR343C	HXT6
YNL167C	SKO1	YMR195W	ICY1
YNL167C	SKO1	YKL221W	MCH2
YNL167C	SKO1	YFL016C	MDJ1
YNL167C	SKO1	YER001W	MNN1
YNL167C	SKO1	YMR070W	MOT3
YNL167C	SKO1	YKL062W	MSN4
YNL167C	SKO1	YKL055C	OAR1
YNL167C	SKO1	YMR174C	PAI3
YNL167C	SKO1	YOL084W	PHM7
YNL167C	SKO1	YOR161C	PNS1
YNL167C	SKO1	YJL108C	PRM10
YNL167C	SKO1	YER075C	PTP3
YNL167C	SKO1	YOR348C	PUT4
YNL167C	SKO1	YOR107W	RGS2
YNL167C	SKO1	RHR2	RHR2
YNL167C	SKO1	YMR247C	RKR1
YNL167C	SKO1	YPR065W	ROX1
YNL167C	SKO1	YCR045C	RRT12
YNL167C	SKO1	YGL126W	SCS3
YNL167C	SKO1	YJL105W	SET4
YNL167C	SKO1	YIL105C	SLM1
YNL167C	SKO1	YNR034W	SOL1
YNL167C	SKO1	YJR159W	SOR1
YNL167C	SKO1	YLR341W	SPO77
YNL167C	SKO1	YBR081C	SPT7
YNL167C	SKO1	YOR247W	SRL1
YNL167C	SKO1	YDR536W	STL1
YNL167C	SKO1	YGR144W	THI4
YNL167C	SKO1	YNL107W	YAF9
YNL167C	SKO1	YBL044W	YBL044W
YNL167C	SKO1	YDR034C-A	YDR034C-A
YNL167C	SKO1	YHL041W	YHL041W
YNL167C	SKO1	YJL107C	YJL107C
YNL167C	SKO1	YKR041W	YKR041W
YNL167C	SKO1	YLR108C	YLR108C
YNL167C	SKO1	YMR018W	YMR018W
YNL167C	SKO1	YMR320W	YMR320W
YNL167C	SKO1	YNL108C	YNL108C
YNL167C	SKO1	YNL193W	YNL193W
YNL167C	SKO1	YOR302W	YOR302W
YNL167C	SKO1	YOR376W	YOR376W
YNL167C	SKO1	YPR064W	YPR064W
YNL167C	SKO1	YGL259W	YPS5
YNL314W	DAL82	YIR027C	DAL1
YNL314W	DAL82	YIR028W	DAL4
YOR028C	CIN5	YHR047C	AAP1
YOR028C	CIN5	YER045C	ACA1
YOR028C	CIN5	YER073W	ALD5
YOR028C	CIN5	YPL061W	ALD6
YOR028C	CIN5	YDR441C	APT2
YOR028C	CIN5	YLL052C	AQY2
YOR028C	CIN5	YJR148W	BAT2
YOR028C	CIN5	YPL161C	BEM4
YOR028C	CIN5	YDL037C	BSC1
YOR028C	CIN5	YGR134W	CAF130
YOR028C	CIN5	YKR066C	CCP1
YOR028C	CIN5	YMR038C	CCS1
YOR028C	CIN5	YGR108W	CLB1
YOR028C	CIN5	YPR013C	CMR3
YOR028C	CIN5	YOR303W	CPA1
YOR028C	CIN5	YPR124W	CTR1
YOR028C	CIN5	YPL177C	CUP9
YOR028C	CIN5	YMR173W	DDR48
YOR028C	CIN5	YDR480W	DIG2
YOR028C	CIN5	YKR071C	DRE2
YOR028C	CIN5	YBR007C	DSF2
YOR028C	CIN5	YBR208C	DUR1,2
YOR028C	CIN5	YGR146C	ECL1
YOR028C	CIN5	YLR228C	ECM22
YOR028C	CIN5	YBR177C	EHT1
YOR028C	CIN5	YKL060C	FBA1
YOR028C	CIN5	YMR319C	FET4
YOR028C	CIN5	YKR102W	FLO10
YOR028C	CIN5	YBR008C	FLR1
YOR028C	CIN5	YOR381W	FRE3
YOR028C	CIN5	YHR049W	FSH1
YOR028C	CIN5	YOR178C	GAC1
YOR028C	CIN5	YLR081W	GAL2
YOR028C	CIN5	YMR136W	GAT2
YOR028C	CIN5	YMR135C	GID8
YOR028C	CIN5	YPL137C	GIP3
YOR028C	CIN5	YEL011W	GLC3
YOR028C	CIN5	YEL046C	GLY1
YOR028C	CIN5	YHR183W	GND1
YOR028C	CIN5	YOL059W	GPD2
YOR028C	CIN5	YKR067W	GPT2
YOR028C	CIN5	YOL151W	GRE2
YOR028C	CIN5	YGR154C	GTO1
YOR028C	CIN5	YPR005C	HAL1
YOR028C	CIN5	YOR032C	HMS1
YOR028C	CIN5	YJR147W	HMS2
YOR028C	CIN5	YOL155C	HPF1
YOR028C	CIN5	YOR319W	HSH49
YOR028C	CIN5	YDR533C	HSP31
YOR028C	CIN5	YGL253W	HXK2
YOR028C	CIN5	YOL156W	HXT11
YOR028C	CIN5	YDL245C	HXT15
YOR028C	CIN5	YJR158W	HXT16
YOR028C	CIN5	YMR011W	HXT2
YOR028C	CIN5	YDR345C	HXT3
YOR028C	CIN5	YDR343C	HXT6
YOR028C	CIN5	YJL219W	HXT9
YOR028C	CIN5	YBR157C	ICS2
YOR028C	CIN5	YJL077C	ICS3
YOR028C	CIN5	YEL044W	IES6
YOR028C	CIN5	YOL157C	IMA2
YOR028C	CIN5	YIL172C	IMA3
YOR028C	CIN5	YJL221C	IMA4
YOR028C	CIN5	YGR238C	KEL2
YOR028C	CIN5	YER038C	KRE29
YOR028C	CIN5	YKL110C	KTI12
YOR028C	CIN5	YEL053C	MAK10
YOR028C	CIN5	YDL003W	MCD1
YOR028C	CIN5	YOR306C	MCH5
YOR028C	CIN5	YGR121C	MEP1
YOR028C	CIN5	YNL145W	MFA2
YOR028C	CIN5	YGR249W	MGA1
YOR028C	CIN5	YLR332W	MID2
YOR028C	CIN5	YGL209W	MIG2
YOR028C	CIN5	YER028C	MIG3
YOR028C	CIN5	YLL061W	MMP1
YOR028C	CIN5	YMR177W	MMT1
YOR028C	CIN5	YOR274W	MOD5
YOR028C	CIN5	YDR033W	MRH1
YOR028C	CIN5	YPR149W	NCE102
YOR028C	CIN5	YKL040C	NFU1
YOR028C	CIN5	YLR328W	NMA1
YOR028C	CIN5	YKL171W	NNK1
YOR028C	CIN5	YHR179W	OYE2
YOR028C	CIN5	YEL058W	PCM1
YOR028C	CIN5	YLR044C	PDC1
YOR028C	CIN5	YHR185C	PFS1
YOR028C	CIN5	YGR233C	PHO81
YOR028C	CIN5	YIL045W	PIG2
YOR028C	CIN5	YEL017C-A	PMP2
YOR028C	CIN5	YCL047C	POF1
YOR028C	CIN5	YDR300C	PRO1
YOR028C	CIN5	YBL064C	PRX1
YOR028C	CIN5	YNL180C	RHO5
YOR028C	CIN5	YKL132C	RMA1
YOR028C	CIN5	YGR180C	RNR4
YOR028C	CIN5	YPR065W	ROX1
YOR028C	CIN5	YIL119C	RPI1
YOR028C	CIN5	YLR075W	RPL10
YOR028C	CIN5	RPL7b	RPL7b
YOR028C	CIN5	RPS4a	RPS4a
YOR028C	CIN5	YOR049C	RSB1
YOR028C	CIN5	YMR266W	RSN1
YOR028C	CIN5	YGR161C	RTS3
YOR028C	CIN5	YPL165C	SET6
YOR028C	CIN5	YDL168W	SFA1
YOR028C	CIN5	YOR315W	SFG1
YOR028C	CIN5	YBL061C	SKT5
YOR028C	CIN5	YLR034C	SMF3
YOR028C	CIN5	YER150W	SPI1
YOR028C	CIN5	YMR017W	SPO20
YOR028C	CIN5	YER046W	SPO73
YOR028C	CIN5	YCR073C	SSK22
YOR028C	CIN5	YKL072W	STB6
YOR028C	CIN5	YOR047C	STD1
YOR028C	CIN5	YNL087W	TCB2
YOR028C	CIN5	YOR273C	TPO4
YOR028C	CIN5	YOR344C	TYE7
YOR028C	CIN5	YDL170W	UGA3
YOR028C	CIN5	YFL004W	VTC2
YOR028C	CIN5	YOL105C	WSC3
YOR028C	CIN5	YHL028W	WSC4
YOR028C	CIN5	YOR230W	WTM1
YOR028C	CIN5	YAL037W	YAL037W
YOR028C	CIN5	YDR259C	YAP6
YOR028C	CIN5	YBL029W	YBL029W
YOR028C	CIN5	YBR071W	YBR071W
YOR028C	CIN5	YCR102C	YCR102C
YOR028C	CIN5	YDL129W	YDL129W
YOR028C	CIN5	YDR132C	YDR132C
YOR028C	CIN5	YDR210W	YDR210W
YOR028C	CIN5	YDR338C	YDR338C
YOR028C	CIN5	YER158C	YER158C
YOR028C	CIN5	YFL051C	YFL051C
YOR028C	CIN5	YFR039C	YFR039C
YOR028C	CIN5	YGR035C	YGR035C
YOR028C	CIN5	YGR234W	YHB1
YOR028C	CIN5	YHL041W	YHL041W
YOR028C	CIN5	YIL108W	YIL108W
YOR028C	CIN5	YIL169C	YIL169C
YOR028C	CIN5	YJL028W	YJL028W
YOR028C	CIN5	YJR003C	YJR003C
YOR028C	CIN5	YJR011C	YJR011C
YOR028C	CIN5	YJR061W	YJR061W
YOR028C	CIN5	YJR154W	YJR154W
YOR028C	CIN5	YLL053C	YLL053C
YOR028C	CIN5	YLL054C	YLL054C
YOR028C	CIN5	YLR001C	YLR001C
YOR028C	CIN5	YLR030W	YLR030W
YOR028C	CIN5	YLR346C	YLR346C
YOR028C	CIN5	YLR413W	YLR413W
YOR028C	CIN5	YLR460C	YLR460C
YOR028C	CIN5	YML119W	YML119W
YOR028C	CIN5	YML131W	YML131W
YOR028C	CIN5	YMR082C	YMR082C
YOR028C	CIN5	YMR265C	YMR265C
YOR028C	CIN5	YNL217W	YNL217W
YOR028C	CIN5	YOL159C	YOL159C
YOR028C	CIN5	YOR302W	YOR302W
YOR028C	CIN5	YBR183W	YPC1
YOR028C	CIN5	YPL277C	YPL277C
YOR028C	CIN5	YPL278C	YPL278C
YOR028C	CIN5	YPR127W	YPR127W
YOR028C	CIN5	YLR121C	YPS3
YOR028C	CIN5	YBR054W	YRO2
YOR028C	CIN5	YOL109W	ZEO1
YOR028C	CIN5	YOL154W	ZPS1
YOR032C	HMS1	YBL074C	AAR2
YOR032C	HMS1	YLR028C	ADE16
YOR032C	HMS1	YBR132C	AGP2
YOR032C	HMS1	YJR100C	AIM25
YOR032C	HMS1	YKR074W	AIM29
YOR032C	HMS1	YJL024C	APS3
YOR032C	HMS1	YMR041C	ARA2
YOR032C	HMS1	YDR184C	ATC1
YOR032C	HMS1	YDR022C	ATG31
YOR032C	HMS1	YML116W	ATR1
YOR032C	HMS1	YNL233W	BNI4
YOR032C	HMS1	YKL007W	CAP1
YOR032C	HMS1	YBR120C	CBP6
YOR032C	HMS1	YGL029W	CGR1
YOR032C	HMS1	YHR142W	CHS7
YOR032C	HMS1	YHR052W	CIC1
YOR032C	HMS1	YBR135W	CKS1
YOR032C	HMS1	YJL003W	COX16
YOR032C	HMS1	YDR179C	CSN9
YOR032C	HMS1	YJL006C	CTK2
YOR032C	HMS1	YOR042W	CUE5
YOR032C	HMS1	YNL111C	CYB5
YOR032C	HMS1	YNL112W	DBP2
YOR032C	HMS1	YHR011W	DIA4
YOR032C	HMS1	YHR021W-A	ECM12
YOR032C	HMS1	YLR080W	EMP46
YOR032C	HMS1	YHR174W	ENO2
YOR032C	HMS1	YGL001C	ERG26
YOR032C	HMS1	YLR318W	EST2
YOR032C	HMS1	YMR052W	FAR3
YOR032C	HMS1	YDR339C	FCF1
YOR032C	HMS1	YIL134W	FLX1
YOR032C	HMS1	YEL047C	FRD1
YOR032C	HMS1	YBR021W	FUR4
YOR032C	HMS1	YER136W	GDI1
YOR032C	HMS1	YEL003W	GIM4
YOR032C	HMS1	YGL121C	GPG1
YOR032C	HMS1	YCR065W	HCM1
YOR032C	HMS1	YBR248C	HIS7
YOR032C	HMS1	YCL067C	HMLALPHA2
YOR032C	HMS1	YCR096C	HMRA2
YOR032C	HMS1	YGL077C	HNM1
YOR032C	HMS1	YJR139C	HOM6
YOR032C	HMS1	YOL155C	HPF1
YOR032C	HMS1	YMR186W	HSC82
YOR032C	HMS1	YBL003C	HTA2
YOR032C	HMS1	YBL002W	HTB2
YOR032C	HMS1	YJR118C	ILM1
YOR032C	HMS1	YNL265C	IST1
YOR032C	HMS1	YNL188W	KAR1
YOR032C	HMS1	YDL108W	KIN28
YOR032C	HMS1	YKL008C	LAC1
YOR032C	HMS1	YFR001W	LOC1
YOR032C	HMS1	YDR503C	LPP1
YOR032C	HMS1	YNR050C	LYS9
YOR032C	HMS1	YGL086W	MAD1
YOR032C	HMS1	YCR040W	MATALPHA1
YOR032C	HMS1	YCR039C	MATALPHA2
YOR032C	HMS1	YLR106C	MDN1
YOR032C	HMS1	YGR100W	MDR1
YOR032C	HMS1	YNL145W	MFA2
YOR032C	HMS1	YHR015W	MIP6
YOR032C	HMS1	YGL087C	MMS2
YOR032C	HMS1	YER001W	MNN1
YOR032C	HMS1	YGL136C	MRM2
YOR032C	HMS1	YNL185C	MRPL19
YOR032C	HMS1	YBR122C	MRPL36
YOR032C	HMS1	YFL003C	MSH4
YOR032C	HMS1	YOR156C	NFI1
YOR032C	HMS1	YAR002W	NUP60
YOR032C	HMS1	YPR091C	NVJ2
YOR032C	HMS1	YGL134W	PCL10
YOR032C	HMS1	YLR044C	PDC1
YOR032C	HMS1	YOR153W	PDR5
YOR032C	HMS1	YGR222W	PET54
YOR032C	HMS1	YNL149C	PGA2
YOR032C	HMS1	YKL043W	PHD1
YOR032C	HMS1	YML123C	PHO84
YOR032C	HMS1	YGR199W	PMT6
YOR032C	HMS1	YPL188W	POS5
YOR032C	HMS1	YGR156W	PTI1
YOR032C	HMS1	YHR001W-A	QCR10
YOR032C	HMS1	YLR107W	REX3
YOR032C	HMS1	YLR073C	RFU1
YOR032C	HMS1	YBR275C	RIF1
YOR032C	HMS1	YDR257C	RKM4
YOR032C	HMS1	YEL050C	RML2
YOR032C	HMS1	YLL046C	RNP1
YOR032C	HMS1	YMR258C	ROY1
YOR032C	HMS1	YJL148W	RPA34
YOR032C	HMS1	YLR075W	RPL10
YOR032C	HMS1	RPL15a	RPL15a
YOR032C	HMS1	RPL16a	RPL16a
YOR032C	HMS1	RPL21b	RPL21b
YOR032C	HMS1	RPL23a	RPL23a
YOR032C	HMS1	RPL24a	RPL24a
YOR032C	HMS1	RPL27b	RPL27b
YOR032C	HMS1	YGL030W	RPL30
YOR032C	HMS1	RPL33a	RPL33a
YOR032C	HMS1	RPL35b	RPL35b
YOR032C	HMS1	RPL36a	RPL36a
YOR032C	HMS1	RPL37b	RPL37b
YOR032C	HMS1	RPL41a	RPL41a
YOR032C	HMS1	RPL7a	RPL7a
YOR032C	HMS1	RPL7b	RPL7b
YOR032C	HMS1	YLR340W	RPP0
YOR032C	HMS1	RPP1a	RPP1a
YOR032C	HMS1	RPS11a	RPS11a
YOR032C	HMS1	RPS14b	RPS14b
YOR032C	HMS1	RPS19a	RPS19a
YOR032C	HMS1	RPS22b	RPS22b
YOR032C	HMS1	RPS24a	RPS24a
YOR032C	HMS1	RPS27b	RPS27b
YOR032C	HMS1	RPS29b	RPS29b
YOR032C	HMS1	RPS30a	RPS30a
YOR032C	HMS1	YFR032C	RRT5
YOR032C	HMS1	YHL034C	SBP1
YOR032C	HMS1	YMR013C	SEC59
YOR032C	HMS1	YGL100W	SEH1
YOR032C	HMS1	YLR105C	SEN2
YOR032C	HMS1	YKL006C-A	SFT1
YOR032C	HMS1	YOR073W	SGO1
YOR032C	HMS1	YLR398C	SKI2
YOR032C	HMS1	YCR024C	SLM5
YOR032C	HMS1	YDR189W	SLY1
YOR032C	HMS1	YJL192C	SOP4
YOR032C	HMS1	YPL124W	SPC29
YOR032C	HMS1	YPL130W	SPO19
YOR032C	HMS1	YDR522C	SPS2
YOR032C	HMS1	YER022W	SRB4
YOR032C	HMS1	YDL229W	SSB1
YOR032C	HMS1	YNL209W	SSB2
YOR032C	HMS1	YDR086C	SSS1
YOR032C	HMS1	YDL084W	SUB2
YOR032C	HMS1	YNL066W	SUN4
YOR032C	HMS1	YJL004C	SYS1
YOR032C	HMS1	YLR354C	TAL1
YOR032C	HMS1	YDR212W	TCP1
YOR032C	HMS1	YGR024C	THG1
YOR032C	HMS1	YKR059W	TIF1
YOR032C	HMS1	YHR005C-A	TIM10
YOR032C	HMS1	YNL070W	TOM7
YOR032C	HMS1	YBR162C	TOS1
YOR032C	HMS1	YLR183C	TOS4
YOR032C	HMS1	YLR043C	TRX1
YOR032C	HMS1	YJL048C	UBX6
YOR032C	HMS1	YGR090W	UTP22
YOR032C	HMS1	YGR105W	VMA21
YOR032C	HMS1	YHL035C	VMR1
YOR032C	HMS1	YDR495C	VPS3
YOR032C	HMS1	YJL029C	VPS53
YOR032C	HMS1	YGL104C	VPS73
YOR032C	HMS1	YDR259C	YAP6
YOR032C	HMS1	YBL059W	YBL059W
YOR032C	HMS1	YBR013C	YBR013C
YOR032C	HMS1	YBR062C	YBR062C
YOR032C	HMS1	YCR023C	YCR023C
YOR032C	HMS1	YCR041W	YCR041W
YOR032C	HMS1	YDL109C	YDL109C
YOR032C	HMS1	YDR366C	YDR366C
YOR032C	HMS1	YGL101W	YGL101W
YOR032C	HMS1	YJL059W	YHC3
YOR032C	HMS1	YIL102C	YIL102C
YOR032C	HMS1	YJL007C	YJL007C
YOR032C	HMS1	YJR142W	YJR142W
YOR032C	HMS1	YKL107W	YKL107W
YOR032C	HMS1	YMR106C	YKU80
YOR032C	HMS1	YLR030W	YLR030W
YOR032C	HMS1	YLR302C	YLR302C
YOR032C	HMS1	YOL024W	YOL024W
YOR032C	HMS1	YOR223W	YOR223W
YOR032C	HMS1	YPL261C	YPL261C
YOR032C	HMS1	YML001W	YPT7
YOR032C	HMS1	YBR162W-A	YSY6
YOR032C	HMS1	ZMS1	ZMS1
YOR140W	SFL1	YLL052C	AQY2
YOR140W	SFL1	YDL037C	BSC1
YOR140W	SFL1	YGR052W	FMP48
YOR140W	SFL1	YOL156W	HXT11
YOR140W	SFL1	YGR249W	MGA1
YOR140W	SFL1	YGL158W	RCK1
YOR140W	SFL1	YOR107W	RGS2
YOR140W	SFL1	YAL064W	YAL064W
YOR140W	SFL1	YLL053C	YLL053C
YOR140W	SFL1	YNL234W	YNL234W
YOR344C	TYE7	YBR145W	ADH5
YOR344C	TYE7	YAL038W	CDC19
YOR344C	TYE7	YKL060C	FBA1
YOR344C	TYE7	YKL152C	GPM1
YOR344C	TYE7	YJR009C	TDH2
YOR344C	TYE7	YGR192C	TDH3
YOR358W	HAP5	YLR220W	CCC1
YOR358W	HAP5	YER174C	GRX4
YOR358W	HAP5	YLL027W	ISA1
YOR358W	HAP5	YPL207W	TYW1
YOR358W	HAP5	YDR495C	VPS3
YPL089C	RLM1	YKR103W	NFT1
YPL089C	RLM1	YIL122W	POG1
YPL089C	RLM1	YHL034C	SBP1
YPL089C	RLM1	YKR091W	SRL3
YPL089C	RLM1	YHL041W	YHL041W
YPL089C	RLM1	YJL107C	YJL107C
YPL177C	CUP9	YBL074C	AAR2
YPL177C	CUP9	YDL037C	BSC1
YPL177C	CUP9	YGR108W	CLB1
YPL177C	CUP9	YPR013C	CMR3
YPL177C	CUP9	YEL070W	DSF1
YPL177C	CUP9	YMR136W	GAT2
YPL177C	CUP9	YOR032C	HMS1
YPL177C	CUP9	YOL156W	HXT11
YPL177C	CUP9	YEL069C	HXT13
YPL177C	CUP9	YDL245C	HXT15
YPL177C	CUP9	YJR158W	HXT16
YPL177C	CUP9	YDR343C	HXT6
YPL177C	CUP9	YEL034W	HYP2
YPL177C	CUP9	YGR249W	MGA1
YPL177C	CUP9	YFL003C	MSH4
YPL177C	CUP9	YEL033W	MTC7
YPL177C	CUP9	YDL148C	NOP14
YPL177C	CUP9	YKR093W	PTR2
YPL177C	CUP9	RPP1b	RPP1b
YPL177C	CUP9	YOR049C	RSB1
YPL177C	CUP9	YFR005C	SAD1
YPL177C	CUP9	YOR315W	SFG1
YPL177C	CUP9	YIL099W	SGA1
YPL177C	CUP9	YJR159W	SOR1
YPL177C	CUP9	YDL246C	SOR2
YPL177C	CUP9	YBR166C	TYR1
YPL177C	CUP9	YEL040W	UTR2
YPL177C	CUP9	YEL035C	UTR5
YPL177C	CUP9	YIL056W	VHR1
YPL177C	CUP9	YAL064W	YAL064W
YPL177C	CUP9	YDR259C	YAP6
YPL177C	CUP9	YBL029W	YBL029W
YPL177C	CUP9	YDL129W	YDL129W
YPL177C	CUP9	YDR042C	YDR042C
YPL177C	CUP9	YFR006W	YFR006W
YPL177C	CUP9	YGL101W	YGL101W
YPL177C	CUP9	YIL102C	YIL102C
YPL177C	CUP9	YJL007C	YJL007C
YPL177C	CUP9	YLR345W	YLR345W
YPL202C	AFT2	YOR226C	ISU2
YPL202C	AFT2	YKR052C	MRS4
YPL202C	AFT2	YLR034C	SMF3
YPL202C	AFT2	YDL114W	YDL114W
YPL248C	GAL4	YBR020W	GAL1
YPL248C	GAL4	YBR019C	GAL10
YPL248C	GAL4	YLR081W	GAL2
YPL248C	GAL4	YDR009W	GAL3
YPL248C	GAL4	YBR018C	GAL7
YPL248C	GAL4	YML051W	GAL80
YPL248C	GAL4	YBL112C	YBL112C
YPL248C	GAL4	YBL113C	YBL113C
YPR065W	ROX1	YBL074C	AAR2
YPR065W	ROX1	YDR525W	API2
YPR065W	ROX1	YGL029W	CGR1
YPR065W	ROX1	YPR013C	CMR3
YPR065W	ROX1	YMR319C	FET4
YPR065W	ROX1	YEL047C	FRD1
YPR065W	ROX1	YMR136W	GAT2
YPR065W	ROX1	YGR256W	GND2
YPR065W	ROX1	YOL156W	HXT11
YPR065W	ROX1	YDL245C	HXT15
YPR065W	ROX1	YML056C	IMD4
YPR065W	ROX1	YDL148C	NOP14
YPR065W	ROX1	YHR185C	PFS1
YPR065W	ROX1	YJL148W	RPA34
YPR065W	ROX1	YIL119C	RPI1
YPR065W	ROX1	YDR077W	SED1
YPR065W	ROX1	YJL105W	SET4
YPR065W	ROX1	YLR034C	SMF3
YPR065W	ROX1	YJR159W	SOR1
YPR065W	ROX1	YDL246C	SOR2
YPR065W	ROX1	YPL130W	SPO19
YPR065W	ROX1	YMR017W	SPO20
YPR065W	ROX1	YCR073C	SSK22
YPR065W	ROX1	YPL230W	USV1
YPR065W	ROX1	YEL040W	UTR2
YPR065W	ROX1	YIL056W	VHR1
YPR065W	ROX1	YDR278C	YDR278C
YPR065W	ROX1	YER137C	YER137C
YPR065W	ROX1	YKR073C	YKR073C
