# Supplementary material for: Dual threshold optimization and network inference reveal convergent evidence from TF binding locations and TF perturbation responses
Source: Genome Res. 2020 Mar;30(3):459–71. doi: 10.1101/gr.259655.119 (PMC7111528; doi:10.1101/gr.259655.119)
Supplement: Supplemental Material [file supp_gr.259655.119_Supplemental_File_S3.xlsx]

## Sheet: README
Supplemental File S3: Network edges from acceptable TFs to their bound and responsive genes after dual threshold optimization on Harbison ChIP and output from NetProphet 2.0 run all Kemmeren TFKO response data.
Column	Description
TF_systematicName	Transcription factor in systematic name
TF_commonName	Transcription factor in common name
Gene_systematicName	Target gene in systematic name
Gene_commonName	Traget gene in common name

## Sheet: Supplemental_File_S3
TF_systematicName	TF_commonName	Gene_systematicName	Gene_commonName
YBL005W	PDR3	YBL006C	LDB7
YBL005W	PDR3	YBL005W	PDR3
YBL021C	HAP3	YBR039W	ATP3
YBL021C	HAP3	YLR220W	CCC1
YBL021C	HAP3	YGL187C	COX4
YBL021C	HAP3	YHR051W	COX6
YBL021C	HAP3	YER174C	GRX4
YBL021C	HAP3	YML120C	NDI1
YBL021C	HAP3	YHR001W-A	QCR10
YBL021C	HAP3	YPL207W	TYW1
YBR083W	TEC1	YNR044W	AGA1
YBR083W	TEC1	YGR189C	CRH1
YBR083W	TEC1	YKL096W	CWP1
YBR083W	TEC1	YCR089W	FIG2
YBR083W	TEC1	YCL027W	FUS1
YBR083W	TEC1	YBL016W	FUS3
YBR083W	TEC1	YDR309C	GIC2
YBR083W	TEC1	YHR005C	GPA1
YBR083W	TEC1	YOR126C	IAH1
YBR083W	TEC1	YCL055W	KAR4
YBR083W	TEC1	YNL145W	MFA2
YBR083W	TEC1	YJL186W	MNN5
YBR083W	TEC1	YGR014W	MSB2
YBR083W	TEC1	YNL289W	PCL1
YBR083W	TEC1	YLR084C	RAX2
YBR083W	TEC1	YIL119C	RPI1
YBR083W	TEC1	YOR315W	SFG1
YBR083W	TEC1	YOR247W	SRL1
YBR083W	TEC1	YKR091W	SRL3
YBR083W	TEC1	YLR452C	SST2
YBR083W	TEC1	YHR084W	STE12
YBR083W	TEC1	YPL057C	SUR1
YBR083W	TEC1	YPL163C	SVS1
YBR083W	TEC1	YBR083W	TEC1
YBR083W	TEC1	YGR221C	TOS2
YBR083W	TEC1	YEL040W	UTR2
YBR083W	TEC1	YBL112C	YBL112C
YBR083W	TEC1	YDR210W	YDR210W
YBR083W	TEC1	YGR039W	YGR039W
YBR083W	TEC1	YLR413W	YLR413W
YDL048C	STP4	YJL185C	ATG36
YDL048C	STP4	YIL159W	BNR1
YDL048C	STP4	YCR089W	FIG2
YDL048C	STP4	YPR184W	GDB1
YDL048C	STP4	YMR011W	HXT2
YDL048C	STP4	YOR328W	PDR10
YDL048C	STP4	YHR160C	PEX18
YDL048C	STP4	YOL084W	PHM7
YDL048C	STP4	YBR296C	PHO89
YDL048C	STP4	YIL160C	POT1
YDL048C	STP4	YIL099W	SGA1
YDL048C	STP4	YER011W	TIR1
YDL048C	STP4	YAR029W	YAR029W
YDL048C	STP4	YKL133C	YKL133C
YDL048C	STP4	YMR018W	YMR018W
YDL048C	STP4	YNL193W	YNL193W
YDL048C	STP4	YNL194C	YNL194C
YDL056W	MBP1	YKL112W	ABF1
YDL056W	MBP1	YNR044W	AGA1
YDL056W	MBP1	YBR070C	ALG14
YDL056W	MBP1	YJL115W	ASF1
YDL056W	MBP1	YGR188C	BUB1
YDL056W	MBP1	YOR074C	CDC21
YDL056W	MBP1	YLR103C	CDC45
YDL056W	MBP1	YJL194W	CDC6
YDL056W	MBP1	YDL017W	CDC7
YDL056W	MBP1	YPR120C	CLB5
YDL056W	MBP1	YGR109C	CLB6
YDL056W	MBP1	YMR199W	CLN1
YDL056W	MBP1	YDR263C	DIN7
YDL056W	MBP1	YER124C	DSE1
YDL056W	MBP1	YDL101C	DUN1
YDL056W	MBP1	YBR078W	ECM33
YDL056W	MBP1	YJL196C	ELO1
YDL056W	MBP1	YDL018C	ERP3
YDL056W	MBP1	YLR300W	EXG1
YDL056W	MBP1	YMR215W	GAS3
YDL056W	MBP1	YHR061C	GIC1
YDL056W	MBP1	YDR507C	GIN4
YDL056W	MBP1	YNL274C	GOR1
YDL056W	MBP1	YCR065W	HCM1
YDL056W	MBP1	YBL003C	HTA2
YDL056W	MBP1	YBL002W	HTB2
YDL056W	MBP1	Ho	Ho
YDL056W	MBP1	YFR017C	IGD1
YDL056W	MBP1	YIL026C	IRR1
YDL056W	MBP1	YJL073W	JEM1
YDL056W	MBP1	YDL003W	MCD1
YDL056W	MBP1	YKL150W	MCR1
YDL056W	MBP1	YDR097C	MSH6
YDL056W	MBP1	YJL116C	NCA3
YDL056W	MBP1	YNR009W	NRM1
YDL056W	MBP1	YNL289W	PCL1
YDL056W	MBP1	YMR076C	PDS5
YDL056W	MBP1	YDR501W	PLM2
YDL056W	MBP1	YKL113C	RAD27
YDL056W	MBP1	YER095W	RAD51
YDL056W	MBP1	YER070W	RNR1
YDL056W	MBP1	YGR180C	RNR4
YDL056W	MBP1	YAR008W	SEN34
YDL056W	MBP1	YHR149C	SKG6
YDL056W	MBP1	YMR179W	SPT21
YDL056W	MBP1	YOR247W	SRL1
YDL056W	MBP1	YJL187C	SWE1
YDL056W	MBP1	YER111C	SWI4
YDL056W	MBP1	YER071C	TDA2
YDL056W	MBP1	YGR221C	TOS2
YDL056W	MBP1	YBR071W	YBR071W
YDL056W	MBP1	YDR115W	YDR115W
YDL056W	MBP1	YDR451C	YHP1
YDL056W	MBP1	YJR030C	YJR030C
YDL056W	MBP1	YKL151C	YKL151C
YDL056W	MBP1	YMR144W	YMR144W
YDL056W	MBP1	YML027W	YOX1
YDR123C	INO2	YBR029C	CDS1
YDR123C	INO2	YPL231W	FAS2
YDR123C	INO2	YJL153C	INO1
YDR123C	INO2	YDR497C	ITR1
YDR123C	INO2	YGR238C	KEL2
YDR123C	INO2	YDL049C	KNH1
YDR123C	INO2	YJR074W	MOG1
YDR123C	INO2	YNL175C	NOP13
YDR123C	INO2	YHL020C	OPI1
YDR123C	INO2	YJR073C	OPI3
YDR123C	INO2	YNL169C	PSD1
YDR123C	INO2	YER043C	SAH1
YDR146C	SWI5	YPL158C	AIM44
YDR146C	SWI5	YBR158W	AMN1
YDR146C	SWI5	YKL185W	ASH1
YDR146C	SWI5	YNL192W	CHS1
YDR146C	SWI5	YLR286C	CTS1
YDR146C	SWI5	YDL117W	CYK3
YDR146C	SWI5	YNL327W	EGT2
YDR146C	SWI5	YIL009W	FAA3
YDR146C	SWI5	YNL078W	NIS1
YDR146C	SWI5	YDL179W	PCL9
YDR146C	SWI5	YGR086C	PIL1
YDR146C	SWI5	YKL164C	PIR1
YDR146C	SWI5	YJL078C	PRY3
YDR146C	SWI5	YDR055W	PST1
YDR146C	SWI5	YJL217W	REE1
YDR146C	SWI5	YHR087W	RTC3
YDR146C	SWI5	YLR079W	SIC1
YDR146C	SWI5	YNL047C	SLM2
YDR146C	SWI5	YBR083W	TEC1
YDR146C	SWI5	YPL157W	TGS1
YDR146C	SWI5	YBR071W	YBR071W
YDR146C	SWI5	YDL119C	YDL119C
YDR146C	SWI5	YLR049C	YLR049C
YDR146C	SWI5	YLR194C	YLR194C
YDR146C	SWI5	YNL046W	YNL046W
YDR207C	UME6	YAL054C	ACS1
YDR207C	UME6	YHR137W	ARO9
YDR207C	UME6	YNL269W	BSC4
YDR207C	UME6	YML042W	CAT2
YDR207C	UME6	YJR161C	COS5
YDR207C	UME6	YPL119C	DBP1
YDR207C	UME6	YKL078W	DHR2
YDR207C	UME6	YER179W	DMC1
YDR207C	UME6	YKR009C	FOX2
YDR207C	UME6	YLR445W	GMC2
YDR207C	UME6	YJL103C	GSM1
YDR207C	UME6	YLR450W	HMG2
YDR207C	UME6	YJR036C	HUL4
YDR207C	UME6	YJL153C	INO1
YDR207C	UME6	YOL101C	IZH4
YDR207C	UME6	YPL121C	MEI5
YDR207C	UME6	YGL183C	MND1
YDR207C	UME6	YKL062W	MSN4
YDR207C	UME6	YOR328W	PDR10
YDR207C	UME6	YGL205W	POX1
YDR207C	UME6	YPL156C	PRM4
YDR207C	UME6	YKL015W	PUT3
YDR207C	UME6	YLR263W	RED1
YDR207C	UME6	YHL024W	RIM4
YDR207C	UME6	YGL250W	RMR1
YDR207C	UME6	YLL046C	RNP1
YDR207C	UME6	YJL089W	SIP4
YDR207C	UME6	YHR014W	SPO13
YDR207C	UME6	YKL086W	SRX1
YDR207C	UME6	YJL083W	TAX4
YDR207C	UME6	YOR352W	TFB6
YDR207C	UME6	YLR183C	TOS4
YDR207C	UME6	YGR019W	UGA1
YDR207C	UME6	YLR373C	VID22
YDR207C	UME6	YGR194C	XKS1
YDR207C	UME6	YBL086C	YBL086C
YDR207C	UME6	YBR184W	YBR184W
YDR207C	UME6	YBR284W	YBR284W
YDR207C	UME6	YCR061W	YCR061W
YDR207C	UME6	YDR042C	YDR042C
YDR207C	UME6	YMR040W	YET2
YDR207C	UME6	YGR053C	YGR053C
YDR207C	UME6	YHR138C	YHR138C
YDR207C	UME6	YLL030C	YLL030C
YDR207C	UME6	YDR285W	ZIP1
YDR216W	ADR1	YMR169C	ALD3
YDR216W	ADR1	YGR088W	CTT1
YDR216W	ADR1	YML128C	MSC1
YDR216W	ADR1	YER150W	SPI1
YDR216W	ADR1	YKL216W	URA1
YDR253C	MET32	YFR030W	MET10
YDR253C	MET32	YKL001C	MET14
YDR253C	MET32	YPR167C	MET16
YDR253C	MET32	YLR303W	MET17
YDR253C	MET32	YNL277W	MET2
YDR253C	MET32	YIR017C	MET28
YDR253C	MET32	YJR010W	MET3
YDR253C	MET32	YJR137C	MET5
YDR253C	MET32	YER091C	MET6
YDR253C	MET32	YHL036W	MUP3
YDR253C	MET32	YLR180W	SAM1
YDR253C	MET32	YGL184C	STR3
YDR253C	MET32	YLR092W	SUL2
YDR253C	MET32	YLR179C	YLR179C
YDR259C	YAP6	YHR047C	AAP1
YDR259C	YAP6	YDR441C	APT2
YDR259C	YAP6	YPR192W	AQY1
YDR259C	YAP6	YML116W	ATR1
YDR259C	YAP6	YOR028C	CIN5
YDR259C	YAP6	YPR013C	CMR3
YDR259C	YAP6	YMR319C	FET4
YDR259C	YAP6	YKR102W	FLO10
YDR259C	YAP6	YHR049W	FSH1
YDR259C	YAP6	YKR039W	GAP1
YDR259C	YAP6	YMR136W	GAT2
YDR259C	YAP6	YIR013C	GAT4
YDR259C	YAP6	YOL151W	GRE2
YDR259C	YAP6	YKL109W	HAP4
YDR259C	YAP6	YOL155C	HPF1
YDR259C	YAP6	YEL069C	HXT13
YDR259C	YAP6	YJR158W	HXT16
YDR259C	YAP6	YOL157C	IMA2
YDR259C	YAP6	YJL221C	IMA4
YDR259C	YAP6	YJL216C	IMA5
YDR259C	YAP6	YNL145W	MFA2
YDR259C	YAP6	YOR153W	PDR5
YDR259C	YAP6	YJL217W	REE1
YDR259C	YAP6	YNL180C	RHO5
YDR259C	YAP6	YOR049C	RSB1
YDR259C	YAP6	YDL246C	SOR2
YDR259C	YAP6	YER158C	YER158C
YDR259C	YAP6	YGR234W	YHB1
YDR259C	YAP6	YIR020C	YIR020C
YDR259C	YAP6	YLL053C	YLL053C
YDR259C	YAP6	YLR413W	YLR413W
YDR259C	YAP6	YML131W	YML131W
YDR259C	YAP6	YOR029W	YOR029W
YDR259C	YAP6	YLR121C	YPS3
YDR259C	YAP6	YOL154W	ZPS1
YDR310C	SUM1	YJR025C	BNA1
YDR310C	SUM1	YJR078W	BNA2
YDR310C	SUM1	YBL098W	BNA4
YDR310C	SUM1	YLR231C	BNA5
YDR310C	SUM1	YFR047C	BNA6
YDR310C	SUM1	YLR308W	CDA2
YDR310C	SUM1	YCR005C	CIT2
YDR310C	SUM1	YIR027C	DAL1
YDR310C	SUM1	YIR028W	DAL4
YDR310C	SUM1	YIR030C	DCG1
YDR310C	SUM1	YFR012W	DCV1
YDR310C	SUM1	YBR201W	DER1
YDR310C	SUM1	YDR403W	DIT1
YDR310C	SUM1	YBR180W	DTR1
YDR310C	SUM1	YBR076W	ECM8
YDR310C	SUM1	YLR343W	GAS2
YDR310C	SUM1	YBR045C	GIP1
YDR310C	SUM1	YGR256W	GND2
YDR310C	SUM1	YOR237W	HES1
YDR310C	SUM1	YDR317W	HIM1
YDR310C	SUM1	YDR533C	HSP31
YDR310C	SUM1	YNL318C	HXT14
YDR310C	SUM1	YJL037W	IRC18
YDR310C	SUM1	YPR139C	LOA1
YDR310C	SUM1	YJL038C	LOH1
YDR310C	SUM1	YIR034C	LYS1
YDR310C	SUM1	YHR015W	MIP6
YDR310C	SUM1	YNL185C	MRPL19
YDR310C	SUM1	YOR071C	NRT1
YDR310C	SUM1	YOR255W	OSW1
YDR310C	SUM1	YEL058W	PCM1
YDR310C	SUM1	YFR023W	PES4
YDR310C	SUM1	YHR185C	PFS1
YDR310C	SUM1	YDR281C	PHM6
YDR310C	SUM1	YIL037C	PRM2
YDR310C	SUM1	YML047C	PRM6
YDR310C	SUM1	YCR045C	RRT12
YDR310C	SUM1	YGL146C	RRT6
YDR310C	SUM1	YPL130W	SPO19
YDR310C	SUM1	YOL091W	SPO21
YDR310C	SUM1	YGL170C	SPO74
YDR310C	SUM1	YLL005C	SPO75
YDR310C	SUM1	YDR218C	SPR28
YDR310C	SUM1	YGR059W	SPR3
YDR310C	SUM1	YDR523C	SPS1
YDR310C	SUM1	YNL202W	SPS19
YDR310C	SUM1	YDR522C	SPS2
YDR310C	SUM1	YCL048W	SPS22
YDR310C	SUM1	YOR313C	SPS4
YDR310C	SUM1	YPL033C	SRL4
YDR310C	SUM1	YHR184W	SSP1
YDR310C	SUM1	YOR242C	SSP2
YDR310C	SUM1	YDR310C	SUM1
YDR310C	SUM1	YOL102C	TPT1
YDR310C	SUM1	YDR185C	UPS3
YDR310C	SUM1	YDL186W	YDL186W
YDR310C	SUM1	YDR042C	YDR042C
YDR310C	SUM1	YDR248C	YDR248C
YDR310C	SUM1	YER085C	YER085C
YDR310C	SUM1	YER187W	YER187W
YDR310C	SUM1	YFL040W	YFL040W
YDR310C	SUM1	YGL015C	YGL015C
YDR310C	SUM1	YGL230C	YGL230C
YDR310C	SUM1	YHL012W	YHL012W
YDR310C	SUM1	YJL043W	YJL043W
YDR310C	SUM1	YJR079W	YJR079W
YDR310C	SUM1	YKR015C	YKR015C
YDR310C	SUM1	YMR244W	YMR244W
YDR310C	SUM1	YNL184C	YNL184C
YDR310C	SUM1	YOL047C	YOL047C
YDR310C	SUM1	YOR214C	YOR214C
YDR310C	SUM1	YPR078C	YPR078C
YDR310C	SUM1	YMR243C	ZRC1
YDR421W	ARO80	YDR380W	ARO10
YDR421W	ARO80	YDR421W	ARO80
YDR421W	ARO80	YHR137W	ARO9
YDR423C	CAD1	YKL103C	APE1
YDR423C	CAD1	YKR071C	DRE2
YDR451C	YHP1	YDR191W	HST4
YDR451C	YHP1	YLR312C	YLR312C
YDR463W	STP1	YBR068C	BAP2
YDR463W	STP1	YLR094C	GIS3
YDR463W	STP1	YML056C	IMD4
YDR463W	STP1	YJL212C	OPT1
YDR463W	STP1	YJL148W	RPA34
YDR463W	STP1	YGR285C	ZUO1
YDR520C	URC2	YHR128W	FUR1
YDR520C	URC2	YKL143W	LTV1
YDR520C	URC2	YER037W	PHM8
YDR520C	URC2	YDR217C	RAD9
YDR520C	URC2	YMR269W	TMA23
YDR520C	URC2	YBR137W	YBR137W
YDR520C	URC2	YLR283W	YLR283W
YEL009C	GCN4	YBR145W	ADH5
YEL009C	GCN4	YER073W	ALD5
YEL009C	GCN4	YOL058W	ARG1
YEL009C	GCN4	YHR018C	ARG4
YEL009C	GCN4	YMR062C	ARG7
YEL009C	GCN4	YDR127W	ARO1
YEL009C	GCN4	YDR035W	ARO3
YEL009C	GCN4	YBR249C	ARO4
YEL009C	GCN4	YPL111W	CAR1
YEL009C	GCN4	YJR109C	CPA2
YEL009C	GCN4	YDL198C	GGC1
YEL009C	GCN4	YCL030C	HIS4
YEL009C	GCN4	YER052C	HOM3
YEL009C	GCN4	YCL009C	ILV6
YEL009C	GCN4	YNL104C	LEU4
YEL009C	GCN4	YOR108W	LEU9
YEL009C	GCN4	YOL119C	MCH4
YEL009C	GCN4	YOL064C	MET22
YEL009C	GCN4	YHR162W	MPC2
YEL009C	GCN4	YHR071W	PCL5
YEL009C	GCN4	YMR095C	SNO1
YEL009C	GCN4	YMR096W	SNZ1
YEL009C	GCN4	YDL170W	UGA3
YEL009C	GCN4	YOR302W	YOR302W
YER040W	GLN3	YPR145W	ASN1
YER040W	GLN3	YPR035W	GLN1
YER040W	GLN3	YFR023W	PES4
YER040W	GLN3	YDR523C	SPS1
YER088C	DOT6	YJL088W	ARG3
YER088C	DOT6	YCR005C	CIT2
YER088C	DOT6	YER145C	FTR1
YER088C	DOT6	YHR071W	PCL5
YER088C	DOT6	YBL054W	TOD6
YER088C	DOT6	YGR234W	YHB1
YER111C	SWI4	YNR044W	AGA1
YER111C	SWI4	YBR070C	ALG14
YER111C	SWI4	YJR148W	BAT2
YER111C	SWI4	YKL007W	CAP1
YER111C	SWI4	YGR140W	CBF2
YER111C	SWI4	YJL194W	CDC6
YER111C	SWI4	YJL158C	CIS3
YER111C	SWI4	YGR109C	CLB6
YER111C	SWI4	YMR199W	CLN1
YER111C	SWI4	YKL096W	CWP1
YER111C	SWI4	YBR112C	CYC8
YER111C	SWI4	YBR078W	ECM33
YER111C	SWI4	YJL196C	ELO1
YER111C	SWI4	YLR300W	EXG1
YER111C	SWI4	YDR261C	EXG2
YER111C	SWI4	YMR136W	GAT2
YER111C	SWI4	YHR061C	GIC1
YER111C	SWI4	YDR309C	GIC2
YER111C	SWI4	YDR507C	GIN4
YER111C	SWI4	YDR513W	GRX2
YER111C	SWI4	YEL017W	GTT3
YER111C	SWI4	YLR256W	HAP1
YER111C	SWI4	YCR065W	HCM1
YER111C	SWI4	YBR009C	HHF1
YER111C	SWI4	YPL127C	HHO1
YER111C	SWI4	YBR010W	HHT1
YER111C	SWI4	YDR224C	HTB1
YER111C	SWI4	YBL002W	HTB2
YER111C	SWI4	YOL012C	HTZ1
YER111C	SWI4	YGL253W	HXK2
YER111C	SWI4	Ho	Ho
YER111C	SWI4	YFR017C	IGD1
YER111C	SWI4	YKL008C	LAC1
YER111C	SWI4	YDL003W	MCD1
YER111C	SWI4	YER001W	MNN1
YER111C	SWI4	YMR070W	MOT3
YER111C	SWI4	YGR014W	MSB2
YER111C	SWI4	YPR149W	NCE102
YER111C	SWI4	YMR145C	NDE1
YER111C	SWI4	YNL289W	PCL1
YER111C	SWI4	YIL013C	PDR11
YER111C	SWI4	YMR006C	PLB2
YER111C	SWI4	YDR501W	PLM2
YER111C	SWI4	YKR013W	PRY2
YER111C	SWI4	YDL055C	PSA1
YER111C	SWI4	YLR142W	PUT1
YER111C	SWI4	YER070W	RNR1
YER111C	SWI4	YGR180C	RNR4
YER111C	SWI4	YNL178W	RPS3
YER111C	SWI4	YGR152C	RSR1
YER111C	SWI4	YOR315W	SFG1
YER111C	SWI4	YHR149C	SKG6
YER111C	SWI4	YDR073W	SNF11
YER111C	SWI4	YPL124W	SPC29
YER111C	SWI4	YMR179W	SPT21
YER111C	SWI4	YOR247W	SRL1
YER111C	SWI4	YML052W	SUR7
YER111C	SWI4	YPL163C	SVS1
YER111C	SWI4	YJL187C	SWE1
YER111C	SWI4	YPL016W	SWI1
YER111C	SWI4	YER111C	SWI4
YER111C	SWI4	YBR162C	TOS1
YER111C	SWI4	YGR221C	TOS2
YER111C	SWI4	YNL300W	TOS6
YER111C	SWI4	YDR453C	TSA2
YER111C	SWI4	YOR344C	TYE7
YER111C	SWI4	YKR042W	UTH1
YER111C	SWI4	YIL056W	VHR1
YER111C	SWI4	YBR071W	YBR071W
YER111C	SWI4	YGR153W	YGR153W
YER111C	SWI4	YDR451C	YHP1
YER111C	SWI4	YMR144W	YMR144W
YER111C	SWI4	YOL019W	YOL019W
YER111C	SWI4	YML027W	YOX1
YER111C	SWI4	YLR121C	YPS3
YER169W	RPH1	YBR033W	EDS1
YER169W	RPH1	YBR126C	TPS1
YGL035C	MIG1	YDR441C	APT2
YGL035C	MIG1	YEL069C	HXT13
YGL035C	MIG1	YJL219W	HXT9
YGL035C	MIG1	YJL216C	IMA5
YGL035C	MIG1	YCR073C	SSK22
YGL071W	AFT1	YGL071W	AFT1
YGL071W	AFT1	YHL040C	ARN1
YGL071W	AFT1	YHR171W	ATG7
YGL071W	AFT1	YDR151C	CTH1
YGL071W	AFT1	YLR137W	RKM5
YGL071W	AFT1	RPL22a	RPL22a
YGL071W	AFT1	YLR136C	TIS11
YGL071W	AFT1	YDR541C	YDR541C
YGL071W	AFT1	YHR138C	YHR138C
YGL237C	HAP2	YDR377W	ATP17
YGL237C	HAP2	YBR039W	ATP3
YGL237C	HAP2	YLR220W	CCC1
YGL237C	HAP2	YGL187C	COX4
YGL237C	HAP2	YHR051W	COX6
YGL237C	HAP2	YJR077C	MIR1
YGL237C	HAP2	YGR084C	MRP13
YGL237C	HAP2	YML120C	NDI1
YGL237C	HAP2	YHR001W-A	QCR10
YGL237C	HAP2	YDR529C	QCR7
YGL237C	HAP2	YGR183C	QCR9
YGL237C	HAP2	YEL024W	RIP1
YGL237C	HAP2	YPL207W	TYW1
YGL237C	HAP2	YGR234W	YHB1
YGL237C	HAP2	YFR003C	YPI1
YHL020C	OPI1	YGL077C	HNM1
YHL020C	OPI1	YJL153C	INO1
YHL020C	OPI1	YDR497C	ITR1
YHL020C	OPI1	YJR074W	MOG1
YHL020C	OPI1	YJR073C	OPI3
YHL020C	OPI1	YNL169C	PSD1
YHR006W	STP2	YDR216W	ADR1
YHR006W	STP2	YCL025C	AGP1
YHR006W	STP2	YOL077W-A	ATP19
YHR084W	STE12	YDR085C	AFR1
YHR084W	STE12	YNR044W	AGA1
YHR084W	STE12	YGL032C	AGA2
YHR084W	STE12	YIL015W	BAR1
YHR084W	STE12	YNL192W	CHS1
YHR084W	STE12	YCL027W	FUS1
YHR084W	STE12	YBL016W	FUS3
YHR084W	STE12	YDR309C	GIC2
YHR084W	STE12	YHR005C	GPA1
YHR084W	STE12	YKL189W	HYM1
YHR084W	STE12	YCL055W	KAR4
YHR084W	STE12	YMR065W	KAR5
YHR084W	STE12	YDR461W	MFA1
YHR084W	STE12	YGR014W	MSB2
YHR084W	STE12	YIL037C	PRM2
YHR084W	STE12	YPL156C	PRM4
YHR084W	STE12	YML047C	PRM6
YHR084W	STE12	YML046W	PRP39
YHR084W	STE12	YOR247W	SRL1
YHR084W	STE12	YKR091W	SRL3
YHR084W	STE12	YLR452C	SST2
YHR084W	STE12	YHR084W	STE12
YHR084W	STE12	YFL026W	STE2
YHR084W	STE12	YBR083W	TEC1
YHR084W	STE12	YKR042W	UTH1
YHR178W	STB5	YHR183W	GND1
YHR178W	STB5	YDL049C	KNH1
YHR178W	STB5	YHR163W	SOL3
YHR206W	SKN7	YFL030W	AGX1
YHR206W	SKN7	YLR109W	AHP1
YHR206W	SKN7	YGR097W	ASK10
YHR206W	SKN7	YJL158C	CIS3
YHR206W	SKN7	YMR199W	CLN1
YHR206W	SKN7	YDR231C	COX20
YHR206W	SKN7	YOR100C	CRC1
YHR206W	SKN7	YKL096W	CWP1
YHR206W	SKN7	YKL096W-A	CWP2
YHR206W	SKN7	YMR173W	DDR48
YHR206W	SKN7	YGR146C	ECL1
YHR206W	SKN7	YHR007C	ERG11
YHR206W	SKN7	YEL047C	FRD1
YHR206W	SKN7	YMR307W	GAS1
YHR206W	SKN7	YDR309C	GIC2
YHR206W	SKN7	YGR032W	GSC2
YHR206W	SKN7	YLR258W	GSY2
YHR206W	SKN7	YDR232W	HEM1
YHR206W	SKN7	YDR044W	HEM13
YHR206W	SKN7	YLR205C	HMX1
YHR206W	SKN7	YLL026W	HSP104
YHR206W	SKN7	YBR157C	ICS2
YHR206W	SKN7	YMR195W	ICY1
YHR206W	SKN7	YJL106W	IME2
YHR206W	SKN7	YDL049C	KNH1
YHR206W	SKN7	YLL019C	KNS1
YHR206W	SKN7	YDL051W	LHP1
YHR206W	SKN7	YDL182W	LYS20
YHR206W	SKN7	YER001W	MNN1
YHR206W	SKN7	YKL062W	MSN4
YHR206W	SKN7	YJL116C	NCA3
YHR206W	SKN7	YDR043C	NRG1
YHR206W	SKN7	YGL038C	OCH1
YHR206W	SKN7	YDL127W	PCL2
YHR206W	SKN7	YIL013C	PDR11
YHR206W	SKN7	YFR034C	PHO4
YHR206W	SKN7	YKL163W	PIR3
YHR206W	SKN7	YMR006C	PLB2
YHR206W	SKN7	YOR161C	PNS1
YHR206W	SKN7	YJL079C	PRY1
YHR206W	SKN7	YKR013W	PRY2
YHR206W	SKN7	YER075C	PTP3
YHR206W	SKN7	YLR414C	PUN1
YHR206W	SKN7	YGR180C	RNR4
YHR206W	SKN7	YPR065W	ROX1
YHR206W	SKN7	YDR156W	RPA14
YHR206W	SKN7	YGR213C	RTA1
YHR206W	SKN7	YMR305C	SCW10
YHR206W	SKN7	YGR279C	SCW4
YHR206W	SKN7	YOR247W	SRL1
YHR206W	SKN7	YPR009W	SUT2
YHR206W	SKN7	YJL035C	TAD2
YHR206W	SKN7	YER011W	TIR1
YHR206W	SKN7	YML028W	TSA1
YHR206W	SKN7	YKR042W	UTH1
YHR206W	SKN7	YDL124W	YDL124W
YHR206W	SKN7	YDR186C	YDR186C
YHR206W	SKN7	YGR050C	YGR050C
YHR206W	SKN7	YLR108C	YLR108C
YHR206W	SKN7	YLR257W	YLR257W
YHR206W	SKN7	YLR413W	YLR413W
YHR206W	SKN7	YLR121C	YPS3
YIL131C	FKH1	YGL256W	ADH4
YIL131C	FKH1	YCL064C	CHA1
YIL131C	FKH1	YPR119W	CLB2
YIL131C	FKH1	YER124C	DSE1
YIL131C	FKH1	YCR075C	ERS1
YIL131C	FKH1	YPL141C	FRK1
YIL131C	FKH1	YMR215W	GAS3
YIL131C	FKH1	YOL030W	GAS5
YIL131C	FKH1	YHR094C	HXT1
YIL131C	FKH1	YER070W	RNR1
YIL131C	FKH1	YGL028C	SCW11
YIL131C	FKH1	YGR099W	TEL2
YIL131C	FKH1	YBR139W	YBR139W
YIL131C	FKH1	YKL069W	YKL069W
YIR023W	DAL81	YCL025C	AGP1
YIR023W	DAL81	YPR145W	ASN1
YIR023W	DAL81	YBR068C	BAP2
YIR023W	DAL81	YDR046C	BAP3
YIR023W	DAL81	YPL265W	DIP5
YIR023W	DAL81	YDR047W	HEM12
YIR023W	DAL81	YDL182W	LYS20
YIR023W	DAL81	YLR303W	MET17
YIR023W	DAL81	YJL212C	OPT1
YIR023W	DAL81	YKR093W	PTR2
YIR023W	DAL81	YOL080C	REX4
YIR023W	DAL81	YDL153C	SAS10
YIR023W	DAL81	YBR069C	TAT1
YJL056C	ZAP1	YJL055W	YJL055W
YJL056C	ZAP1	YJL056C	ZAP1
YJL056C	ZAP1	YGL255W	ZRT1
YJL056C	ZAP1	YLR130C	ZRT2
YJL056C	ZAP1	YKL175W	ZRT3
YJR060W	CBF1	YGR204W	ADE3
YJR060W	CBF1	YHL021C	AIM17
YJR060W	CBF1	YCR048W	ARE1
YJR060W	CBF1	YBR249C	ARO4
YJR060W	CBF1	YHR137W	ARO9
YJR060W	CBF1	YLR158C	ASP3-3
YJR060W	CBF1	YNL223W	ATG4
YJR060W	CBF1	YKL016C	ATP7
YJR060W	CBF1	YIL088C	AVT7
YJR060W	CBF1	YER177W	BMH1
YJR060W	CBF1	YER114C	BOI2
YJR060W	CBF1	YAR014C	BUD14
YJR060W	CBF1	YCR047C	BUD23
YJR060W	CBF1	YFL023W	BUD27
YJR060W	CBF1	YJR060W	CBF1
YJR060W	CBF1	YJL209W	CBP1
YJR060W	CBF1	YDR054C	CDC34
YJR060W	CBF1	YKL139W	CTK1
YJR060W	CBF1	YOR065W	CYT1
YJR060W	CBF1	YAL026C	DRS2
YJR060W	CBF1	YER124C	DSE1
YJR060W	CBF1	YGR007W	ECT1
YJR060W	CBF1	YJL167W	ERG20
YJR060W	CBF1	YFR019W	FAB1
YJR060W	CBF1	YNL325C	FIG4
YJR060W	CBF1	YHR089C	GAR1
YJR060W	CBF1	YCR098C	GIT1
YJR060W	CBF1	YMR217W	GUA1
YJR060W	CBF1	YGR223C	HSV2
YJR060W	CBF1	YPL250C	ICY2
YJR060W	CBF1	YNL037C	IDH1
YJR060W	CBF1	YLR174W	IDP2
YJR060W	CBF1	YJR138W	IML1
YJR060W	CBF1	YDR123C	INO2
YJR060W	CBF1	YNL322C	KRE1
YJR060W	CBF1	YNL104C	LEU4
YJR060W	CBF1	YFL018C	LPD1
YJR060W	CBF1	YIR034C	LYS1
YJR060W	CBF1	YFR030W	MET10
YJR060W	CBF1	YNL277W	MET2
YJR060W	CBF1	YIR017C	MET28
YJR060W	CBF1	YJR010W	MET3
YJR060W	CBF1	YNL103W	MET4
YJR060W	CBF1	YJR137C	MET5
YJR060W	CBF1	YCR092C	MSH3
YJR060W	CBF1	YHR042W	NCP1
YJR060W	CBF1	YPL093W	NOG1
YJR060W	CBF1	YPL171C	OYE3
YJR060W	CBF1	YIR006C	PAN1
YJR060W	CBF1	YBR222C	PCS60
YJR060W	CBF1	YOL136C	PFK27
YJR060W	CBF1	YPL206C	PGC1
YJR060W	CBF1	YJL117W	PHO86
YJR060W	CBF1	YER099C	PRS2
YJR060W	CBF1	YDR055W	PST1
YJR060W	CBF1	YDL006W	PTC1
YJR060W	CBF1	YFR033C	QCR6
YJR060W	CBF1	YDL059C	RAD59
YJR060W	CBF1	YEL024W	RIP1
YJR060W	CBF1	YEL072W	RMD6
YJR060W	CBF1	YDL020C	RPN4
YJR060W	CBF1	YCR045C	RRT12
YJR060W	CBF1	YIL127C	RRT14
YJR060W	CBF1	YBR147W	RTC2
YJR060W	CBF1	YIL074C	SER33
YJR060W	CBF1	YJL168C	SET2
YJR060W	CBF1	YOR327C	SNC2
YJR060W	CBF1	YHR136C	SPL2
YJR060W	CBF1	YIL126W	STH1
YJR060W	CBF1	YLR092W	SUL2
YJR060W	CBF1	YDR297W	SUR2
YJR060W	CBF1	YJR009C	TDH2
YJR060W	CBF1	YBR091C	TIM12
YJR060W	CBF1	YHR099W	TRA1
YJR060W	CBF1	YDR124W	YDR124W
YJR060W	CBF1	YEL043W	YEL043W
YJR060W	CBF1	YIR007W	YIR007W
YJR060W	CBF1	YLR149C	YLR149C
YJR060W	CBF1	YMR196W	YMR196W
YKL038W	RGT1	YHR094C	HXT1
YKL038W	RGT1	YER028C	MIG3
YKL043W	PHD1	YDR441C	APT2
YKL043W	PHD1	YHL040C	ARN1
YKL043W	PHD1	YBR068C	BAP2
YKL043W	PHD1	YLR399C	BDF1
YKL043W	PHD1	YPL177C	CUP9
YKL043W	PHD1	YKL096W	CWP1
YKL043W	PHD1	YEL039C	CYC7
YKL043W	PHD1	YMR173W	DDR48
YKL043W	PHD1	YPL265W	DIP5
YKL043W	PHD1	YBL043W	ECM13
YKL043W	PHD1	YIL009W	FAA3
YKL043W	PHD1	YMR319C	FET4
YKL043W	PHD1	YOR382W	FIT2
YKL043W	PHD1	YHR049W	FSH1
YKL043W	PHD1	YMR136W	GAT2
YKL043W	PHD1	YDR295C	HDA2
YKL043W	PHD1	YDR044W	HEM13
YKL043W	PHD1	YHR094C	HXT1
YKL043W	PHD1	YMR011W	HXT2
YKL043W	PHD1	YDR343C	HXT6
YKL043W	PHD1	YBR157C	ICS2
YKL043W	PHD1	YMR195W	ICY1
YKL043W	PHD1	YOL157C	IMA2
YKL043W	PHD1	YJL221C	IMA4
YKL043W	PHD1	YPL017C	IRC15
YKL043W	PHD1	YNL104C	LEU4
YKL043W	PHD1	YKL093W	MBR1
YKL043W	PHD1	YER001W	MNN1
YKL043W	PHD1	YKL062W	MSN4
YKL043W	PHD1	YBL030C	PET9
YKL043W	PHD1	YBR092C	PHO3
YKL043W	PHD1	YOR161C	PNS1
YKL043W	PHD1	YJL079C	PRY1
YKL043W	PHD1	YHL024W	RIM4
YKL043W	PHD1	YPL024W	RMI1
YKL043W	PHD1	YOR049C	RSB1
YKL043W	PHD1	YMR266W	RSN1
YKL043W	PHD1	YLR180W	SAM1
YKL043W	PHD1	YJL105W	SET4
YKL043W	PHD1	YIL099W	SGA1
YKL043W	PHD1	YMR140W	SIP5
YKL043W	PHD1	YMR016C	SOK2
YKL043W	PHD1	YHR136C	SPL2
YKL043W	PHD1	YMR017W	SPO20
YKL043W	PHD1	YLR452C	SST2
YKL043W	PHD1	YFL026W	STE2
YKL043W	PHD1	YBR069C	TAT1
YKL043W	PHD1	YBR067C	TIP1
YKL043W	PHD1	YLL028W	TPO1
YKL043W	PHD1	YDR453C	TSA2
YKL043W	PHD1	YPL230W	USV1
YKL043W	PHD1	YEL040W	UTR2
YKL043W	PHD1	YHL028W	WSC4
YKL043W	PHD1	YBL029W	YBL029W
YKL043W	PHD1	YGR201C	YGR201C
YKL043W	PHD1	YJL218W	YJL218W
YKL043W	PHD1	YKL044W	YKL044W
YKL043W	PHD1	YLR413W	YLR413W
YKL043W	PHD1	YML131W	YML131W
YKL043W	PHD1	YOR062C	YOR062C
YKL043W	PHD1	ZMS1	ZMS1
YKL109W	HAP4	YBL099W	ATP1
YKL109W	HAP4	YLR295C	ATP14
YKL109W	HAP4	YPL271W	ATP15
YKL109W	HAP4	YDL004W	ATP16
YKL109W	HAP4	YDR377W	ATP17
YKL109W	HAP4	YJR121W	ATP2
YKL109W	HAP4	YPR020W	ATP20
YKL109W	HAP4	YBR039W	ATP3
YKL109W	HAP4	YDR298C	ATP5
YKL109W	HAP4	YKL016C	ATP7
YKL109W	HAP4	YBL045C	COR1
YKL109W	HAP4	YLR038C	COX12
YKL109W	HAP4	YGL191W	COX13
YKL109W	HAP4	YGL187C	COX4
YKL109W	HAP4	COX5a	COX5a
YKL109W	HAP4	YHR051W	COX6
YKL109W	HAP4	YMR256C	COX7
YKL109W	HAP4	YLR395C	COX8
YKL109W	HAP4	YDL067C	COX9
YKL109W	HAP4	YOR065W	CYT1
YKL109W	HAP4	YDL181W	INH1
YKL109W	HAP4	YJR077C	MIR1
YKL109W	HAP4	YML120C	NDI1
YKL109W	HAP4	YBL030C	PET9
YKL109W	HAP4	YPR191W	QCR2
YKL109W	HAP4	YFR033C	QCR6
YKL109W	HAP4	YDR529C	QCR7
YKL109W	HAP4	YGR183C	QCR9
YKL109W	HAP4	YEL024W	RIP1
YKL109W	HAP4	YML091C	RPM2
YKL109W	HAP4	YOR187W	TUF1
YKL109W	HAP4	YLR168C	UPS2
YKR064W	OAF3	YHR022C	YHR022C
YKR064W	OAF3	YNR063W	YNR063W
YKR099W	BAS1	YLR359W	ADE13
YKR099W	BAS1	YMR120C	ADE17
YKR099W	BAS1	YGR204W	ADE3
YKR099W	BAS1	YMR300C	ADE4
YKR099W	BAS1	YGL234W	ADE5,7
YKR099W	BAS1	YGR061C	ADE6
YKR099W	BAS1	YDR408C	ADE8
YKR099W	BAS1	YER061C	CEM1
YKR099W	BAS1	YDR019C	GCV1
YKR099W	BAS1	YMR189W	GCV2
YKR099W	BAS1	YAL044C	GCV3
YKR099W	BAS1	YCL030C	HIS4
YKR099W	BAS1	YER091C	MET6
YKR099W	BAS1	YKR080W	MTD1
YKR099W	BAS1	YLR058C	SHM2
YKR099W	BAS1	YGL186C	TPN1
YLR098C	CHA4	YCL064C	CHA1
YLR098C	CHA4	YDR304C	CPR5
YLR098C	CHA4	YOR319W	HSH49
YLR098C	CHA4	YGR100W	MDR1
YLR098C	CHA4	YDR523C	SPS1
YLR098C	CHA4	YCL063W	VAC17
YLR131C	ACE2	YBR158W	AMN1
YLR131C	ACE2	YGR041W	BUD9
YLR131C	ACE2	YLR286C	CTS1
YLR131C	ACE2	YER124C	DSE1
YLR131C	ACE2	YHR143W	DSE2
YLR131C	ACE2	YNL327W	EGT2
YLR131C	ACE2	YJR147W	HMS2
YLR131C	ACE2	YGL028C	SCW11
YLR176C	RFX1	YOR280C	FSH3
YLR176C	RFX1	YJL026W	RNR2
YLR176C	RFX1	YIL066C	RNR3
YLR176C	RFX1	YGR180C	RNR4
YLR176C	RFX1	YMR279C	YMR279C
YLR176C	RFX1	YOR378W	YOR378W
YLR256W	HAP1	YGR177C	ATF2
YLR256W	HAP1	YNL111C	CYB5
YLR256W	HAP1	YJR048W	CYC1
YLR256W	HAP1	YLR228C	ECM22
YLR256W	HAP1	YML126C	ERG13
YLR256W	HAP1	YGR060W	ERG25
YLR256W	HAP1	YGL001C	ERG26
YLR256W	HAP1	YLR100W	ERG27
YLR256W	HAP1	YER044C	ERG28
YLR256W	HAP1	YMR015C	ERG5
YLR256W	HAP1	YML008C	ERG6
YLR256W	HAP1	YMR220W	ERG8
YLR256W	HAP1	YER145C	FTR1
YLR256W	HAP1	YLR256W	HAP1
YLR256W	HAP1	YML075C	HMG1
YLR256W	HAP1	YMR037C	MSN2
YLR256W	HAP1	YER053C	PIC2
YLR256W	HAP1	YGR234W	YHB1
YLR256W	HAP1	YOL109W	ZEO1
YLR451W	LEU3	YER073W	ALD5
YLR451W	LEU3	YBR068C	BAP2
YLR451W	LEU3	YHR208W	BAT1
YLR451W	LEU3	YJR016C	ILV3
YLR451W	LEU3	YOR226C	ISU2
YLR451W	LEU3	YGL009C	LEU1
YLR451W	LEU3	YNL104C	LEU4
YLR451W	LEU3	YKL120W	OAC1
YLR451W	LEU3	RPS11b	RPS11b
YML007W	YAP1	YLR109W	AHP1
YML007W	YAP1	YOL151W	GRE2
YML007W	YAP1	YJL101C	GSH1
YML007W	YAP1	YDR533C	HSP31
YML007W	YAP1	YKR052C	MRS4
YML007W	YAP1	YPR065W	ROX1
YML007W	YAP1	YJR104C	SOD1
YML007W	YAP1	YML028W	TSA1
YML007W	YAP1	YLR108C	YLR108C
YML007W	YAP1	YLR460C	YLR460C
YML007W	YAP1	YML131W	YML131W
YML007W	YAP1	YNL134C	YNL134C
YML099C	ARG81	YOL058W	ARG1
YML099C	ARG81	YJL088W	ARG3
YML099C	ARG81	YER069W	ARG5,6
YML099C	ARG81	YOL140W	ARG8
YML099C	ARG81	YML099C	ARG81
YML099C	ARG81	YFL023W	BUD27
YML099C	ARG81	YOR303W	CPA1
YML099C	ARG81	YOR302W	YOR302W
YMR016C	SOK2	YDR441C	APT2
YMR016C	SOK2	YBL043W	ECM13
YMR016C	SOK2	YMR319C	FET4
YMR016C	SOK2	YMR136W	GAT2
YMR016C	SOK2	YHR094C	HXT1
YMR016C	SOK2	YOL157C	IMA2
YMR016C	SOK2	YJL221C	IMA4
YMR016C	SOK2	YKL008C	LAC1
YMR016C	SOK2	YGL158W	RCK1
YMR016C	SOK2	YIL119C	RPI1
YMR016C	SOK2	YDR077W	SED1
YMR016C	SOK2	YDL246C	SOR2
YMR016C	SOK2	YMR017W	SPO20
YMR016C	SOK2	YFL026W	STE2
YMR016C	SOK2	YLR237W	THI7
YMR016C	SOK2	YEL040W	UTR2
YMR016C	SOK2	YDR259C	YAP6
YMR016C	SOK2	YBL029W	YBL029W
YMR016C	SOK2	YKL044W	YKL044W
YMR016C	SOK2	YLR413W	YLR413W
YMR019W	STB4	YPR128C	ANT1
YMR019W	STB4	YBR047W	FMP23
YMR019W	STB4	YMR035W	IMP2
YMR019W	STB4	YNL117W	MLS1
YMR019W	STB4	YBR222C	PCS60
YMR019W	STB4	YLL055W	YCT1
YMR019W	STB4	YEL020C	YEL020C
YMR019W	STB4	YIL166C	YIL166C
YMR019W	STB4	YLL056C	YLL056C
YMR019W	STB4	YMR034C	YMR034C
YMR019W	STB4	YBR046C	ZTA1
YMR021C	MAC1	YPR124W	CTR1
YMR021C	MAC1	YPL177C	CUP9
YMR042W	ARG80	YJL088W	ARG3
YMR042W	ARG80	YER069W	ARG5,6
YMR042W	ARG80	YOL140W	ARG8
YMR042W	ARG80	YPL265W	DIP5
YNL068C	FKH2	YGL256W	ADH4
YNL068C	FKH2	YPL111W	CAR1
YNL068C	FKH2	YCL064C	CHA1
YNL068C	FKH2	YPR119W	CLB2
YNL068C	FKH2	YLR286C	CTS1
YNL068C	FKH2	YKL096W	CWP1
YNL068C	FKH2	YER124C	DSE1
YNL068C	FKH2	YCR075C	ERS1
YNL068C	FKH2	YIL131C	FKH1
YNL068C	FKH2	YPL141C	FRK1
YNL068C	FKH2	YMR215W	GAS3
YNL068C	FKH2	YJR147W	HMS2
YNL068C	FKH2	YHR094C	HXT1
YNL068C	FKH2	YMR163C	INP2
YNL068C	FKH2	YKL001C	MET14
YNL068C	FKH2	YDR033W	MRH1
YNL068C	FKH2	YBR092C	PHO3
YNL068C	FKH2	YER070W	RNR1
YNL068C	FKH2	YGL028C	SCW11
YNL068C	FKH2	YGR143W	SKN1
YNL068C	FKH2	YHR152W	SPO12
YNL068C	FKH2	YML052W	SUR7
YNL068C	FKH2	YGR099W	TEL2
YNL068C	FKH2	YBR139W	YBR139W
YNL068C	FKH2	YKL069W	YKL069W
YNL167C	SKO1	YMR303C	ADH2
YNL167C	SKO1	YOR374W	ALD4
YNL167C	SKO1	YPL061W	ALD6
YNL167C	SKO1	YDR441C	APT2
YNL167C	SKO1	YOR349W	CIN1
YNL167C	SKO1	YKL096W	CWP1
YNL167C	SKO1	YLR300W	EXG1
YNL167C	SKO1	FMP43	FMP43
YNL167C	SKO1	YHR049W	FSH1
YNL167C	SKO1	YPR005C	HAL1
YNL167C	SKO1	YJR147W	HMS2
YNL167C	SKO1	YFL014W	HSP12
YNL167C	SKO1	YHR096C	HXT5
YNL167C	SKO1	YJL219W	HXT9
YNL167C	SKO1	YDR072C	IPT1
YNL167C	SKO1	YKL110C	KTI12
YNL167C	SKO1	YGR249W	MGA1
YNL167C	SKO1	YER149C	PEA2
YNL167C	SKO1	YBL030C	PET9
YNL167C	SKO1	YJL108C	PRM10
YNL167C	SKO1	YER075C	PTP3
YNL167C	SKO1	YIL119C	RPI1
YNL167C	SKO1	YDR077W	SED1
YNL167C	SKO1	YDR073W	SNF11
YNL167C	SKO1	YER150W	SPI1
YNL167C	SKO1	YMR304W	UBP15
YNL167C	SKO1	YKR042W	UTH1
YNL167C	SKO1	YGR050C	YGR050C
YNL167C	SKO1	YHR033W	YHR033W
YNL167C	SKO1	YJL107C	YJL107C
YNL167C	SKO1	YLR108C	YLR108C
YNL199C	GCR2	YPL075W	GCR1
YNL199C	GCR2	YKL152C	GPM1
YNL199C	GCR2	YOL155C	HPF1
YNL199C	GCR2	YDR050C	TPI1
YNL216W	RAP1	YBL112C	YBL112C
YNL216W	RAP1	YFL064C	YFL064C
YNL216W	RAP1	YHL049C	YHL049C
YNL216W	RAP1	YIL177C	YIL177C
YNL216W	RAP1	YJL225C	YJL225C
YNL216W	RAP1	YLR467W	YRF1-5
YNL216W	RAP1	YPL283C	YRF1-7
YNL314W	DAL82	YLR438W	CAR2
YNL314W	DAL82	YIR027C	DAL1
YNL314W	DAL82	YIR028W	DAL4
YNR063W	S000005346	YHR022C	YHR022C
YNR063W	S000005346	YNR063W	YNR063W
YOL089C	HAL9	YHR179W	OYE2
YOL089C	HAL9	YPL171C	OYE3
YOL089C	HAL9	YOL084W	PHM7
YOL089C	HAL9	YNL134C	YNL134C
YOL108C	INO4	YJR105W	ADO1
YOL108C	INO4	YBR029C	CDS1
YOL108C	INO4	YER026C	CHO1
YOL108C	INO4	YGR157W	CHO2
YOL108C	INO4	YHR123W	EPT1
YOL108C	INO4	YKL182W	FAS1
YOL108C	INO4	YPL231W	FAS2
YOL108C	INO4	YDR497C	ITR1
YOL108C	INO4	YNL175C	NOP13
YOL108C	INO4	YER043C	SAH1
YOL108C	INO4	YEL040W	UTR2
YOR028C	CIN5	YHR047C	AAP1
YOR028C	CIN5	YCL025C	AGP1
YOR028C	CIN5	YDR441C	APT2
YOR028C	CIN5	YML116W	ATR1
YOR028C	CIN5	YPR013C	CMR3
YOR028C	CIN5	YMR173W	DDR48
YOR028C	CIN5	YOR317W	FAA1
YOR028C	CIN5	YMR319C	FET4
YOR028C	CIN5	YKR102W	FLO10
YOR028C	CIN5	YHR049W	FSH1
YOR028C	CIN5	YKR039W	GAP1
YOR028C	CIN5	YMR136W	GAT2
YOR028C	CIN5	YOL151W	GRE2
YOR028C	CIN5	YOL155C	HPF1
YOR028C	CIN5	YJR158W	HXT16
YOR028C	CIN5	YOL157C	IMA2
YOR028C	CIN5	YJL221C	IMA4
YOR028C	CIN5	YJL216C	IMA5
YOR028C	CIN5	YOR306C	MCH5
YOR028C	CIN5	YNL145W	MFA2
YOR028C	CIN5	YJL217W	REE1
YOR028C	CIN5	YNL180C	RHO5
YOR028C	CIN5	YOR049C	RSB1
YOR028C	CIN5	YMR266W	RSN1
YOR028C	CIN5	YPL165C	SET6
YOR028C	CIN5	YMR016C	SOK2
YOR028C	CIN5	YER046W	SPO73
YOR028C	CIN5	YBR067C	TIP1
YOR028C	CIN5	YOR273C	TPO4
YOR028C	CIN5	YOL105C	WSC3
YOR028C	CIN5	YCR102C	YCR102C
YOR028C	CIN5	YER158C	YER158C
YOR028C	CIN5	YFL051C	YFL051C
YOR028C	CIN5	YGR234W	YHB1
YOR028C	CIN5	YIL169C	YIL169C
YOR028C	CIN5	YIR020C	YIR020C
YOR028C	CIN5	YLL053C	YLL053C
YOR028C	CIN5	YLR413W	YLR413W
YOR028C	CIN5	YLR460C	YLR460C
YOR028C	CIN5	YML131W	YML131W
YOR028C	CIN5	YLR121C	YPS3
YOR028C	CIN5	YBR054W	YRO2
YOR028C	CIN5	YOL154W	ZPS1
YOR113W	AZF1	YLR023C	IZH3
YOR113W	AZF1	YLL019C	KNS1
YOR140W	SFL1	YKR102W	FLO10
YOR140W	SFL1	YJR094C	IME1
YOR140W	SFL1	YGR044C	RME1
YOR140W	SFL1	YER047C	SAP1
YOR140W	SFL1	YEL021W	URA3
YOR140W	SFL1	YGR045C	YGR045C
YOR140W	SFL1	YLL053C	YLL053C
YOR358W	HAP5	YDR377W	ATP17
YOR358W	HAP5	YGL187C	COX4
YOR358W	HAP5	YHR051W	COX6
YOR358W	HAP5	YJR077C	MIR1
YOR358W	HAP5	YPL207W	TYW1
YOR358W	HAP5	YLR168C	UPS2
YPL038W	MET31	YJL060W	BNA3
YPL038W	MET31	YAL012W	CYS3
YPL038W	MET31	YER092W	IES5
YPL038W	MET31	YPR167C	MET16
YPL038W	MET31	YNL277W	MET2
YPL038W	MET31	YJR137C	MET5
YPL038W	MET31	YLL062C	MHT1
YPL038W	MET31	YLL061W	MMP1
YPL038W	MET31	YJL212C	OPT1
YPL038W	MET31	YDL059C	RAD59
YPL038W	MET31	YEL072W	RMD6
YPL038W	MET31	YLR180W	SAM1
YPL038W	MET31	YGL184C	STR3
YPL038W	MET31	YLR179C	YLR179C
YPL075W	GCR1	YOL086C	ADH1
YPL075W	GCR1	YER177W	BMH1
YPL075W	GCR1	YAL038W	CDC19
YPL075W	GCR1	YHR174W	ENO2
YPL075W	GCR1	YKL060C	FBA1
YPL075W	GCR1	YKL152C	GPM1
YPL075W	GCR1	YPL004C	LSP1
YPL075W	GCR1	YGR240C	PFK1
YPL075W	GCR1	YMR205C	PFK2
YPL075W	GCR1	YBR196C	PGI1
YPL075W	GCR1	YJR009C	TDH2
YPL075W	GCR1	YGR192C	TDH3
YPL075W	GCR1	YDR050C	TPI1
YPL089C	RLM1	YDR085C	AFR1
YPL089C	RLM1	YBR158W	AMN1
YPL089C	RLM1	YGR097W	ASK10
YPL089C	RLM1	YJL158C	CIS3
YPL089C	RLM1	YGR189C	CRH1
YPL089C	RLM1	YKL096W	CWP1
YPL089C	RLM1	YNL335W	DDI3
YPL089C	RLM1	YMR238W	DFG5
YPL089C	RLM1	YMR319C	FET4
YPL089C	RLM1	YAL053W	FLC2
YPL089C	RLM1	YLR454W	FMP27
YPL089C	RLM1	YJL159W	HSP150
YPL089C	RLM1	YBR157C	ICS2
YPL089C	RLM1	YOL157C	IMA2
YPL089C	RLM1	YJL106W	IME2
YPL089C	RLM1	YDR072C	IPT1
YPL089C	RLM1	YKL161C	KDX1
YPL089C	RLM1	YER001W	MNN1
YPL089C	RLM1	YEL049W	PAU2
YPL089C	RLM1	YKL163W	PIR3
YPL089C	RLM1	YJL108C	PRM10
YPL089C	RLM1	YDR055W	PST1
YPL089C	RLM1	YDR077W	SED1
YPL089C	RLM1	YGR143W	SKN1
YPL089C	RLM1	YHR030C	SLT2
YPL089C	RLM1	YBR182C	SMP1
YPL089C	RLM1	YKR091W	SRL3
YPL089C	RLM1	YEL040W	UTR2
YPL089C	RLM1	YJL107C	YJL107C
YPL089C	RLM1	YLR012C	YLR012C
YPL089C	RLM1	YLR413W	YLR413W
YPL089C	RLM1	YOR389W	YOR389W
YPL177C	CUP9	YBL043W	ECM13
YPL177C	CUP9	YMR136W	GAT2
YPL177C	CUP9	YMR135C	GID8
YPL177C	CUP9	YJR158W	HXT16
YPL177C	CUP9	YKR093W	PTR2
YPL177C	CUP9	YIL099W	SGA1
YPL177C	CUP9	YDL246C	SOR2
YPL177C	CUP9	YBL029W	YBL029W
YPL177C	CUP9	YFR006W	YFR006W
