# Supplementary material for: Dual threshold optimization and network inference reveal convergent evidence from TF binding locations and TF perturbation responses
Source: Genome Res. 2020 Mar;30(3):459–71. doi: 10.1101/gr.259655.119 (PMC7111528; doi:10.1101/gr.259655.119)
Supplement: Supplemental Material [file supp_gr.259655.119_Supplemental_File_S4.xlsx]

## Sheet: README
Supplemental File S4: Network edges from acceptable TFs to their bound and responsive genes after dual threshold optimization on Harbison ChIP and output from NetProphet 2.0 run ZEV 15 min, 45 min, and 90 min response data.
Column	Description
TF_systematicName	Transcription factor in systematic name
TF_commonName	Transcription factor in common name
Gene_systematicName	Target gene in systematic name
Gene_commonName	Traget gene in common name

## Sheet: Supplemental_File_S4
TF_systematicName	TF_commonName	Gene_systematicName	Gene_commonName
YBL005W	PDR3	YBL006C	LDB7
YBL005W	PDR3	YBL005W	PDR3
YBR083W	TEC1	YAR015W	ADE1
YBR083W	TEC1	YOR129C	AFI1
YBR083W	TEC1	YGL032C	AGA2
YBR083W	TEC1	YBR200W	BEM1
YBR083W	TEC1	YAR014C	BUD14
YBR083W	TEC1	YLR353W	BUD8
YBR083W	TEC1	YAL041W	CDC24
YBR083W	TEC1	YHR142W	CHS7
YBR083W	TEC1	YMR199W	CLN1
YBR083W	TEC1	YKL179C	COY1
YBR083W	TEC1	YNR028W	CPR8
YBR083W	TEC1	YGR189C	CRH1
YBR083W	TEC1	YKL096W-A	CWP2
YBR083W	TEC1	YGR007W	ECT1
YBR083W	TEC1	YFL048C	EMP47
YBR083W	TEC1	YCL027W	FUS1
YBR083W	TEC1	YBL016W	FUS3
YBR083W	TEC1	YMR136W	GAT2
YBR083W	TEC1	YDR309C	GIC2
YBR083W	TEC1	YHR005C	GPA1
YBR083W	TEC1	YLL057C	JLP1
YBR083W	TEC1	YKR061W	KTR2
YBR083W	TEC1	YJL186W	MNN5
YBR083W	TEC1	YGR014W	MSB2
YBR083W	TEC1	YPR155C	NCA2
YBR083W	TEC1	YPR075C	OPY2
YBR083W	TEC1	YHR001W	OSH7
YBR083W	TEC1	YKL127W	PGM1
YBR083W	TEC1	YNL282W	POP3
YBR083W	TEC1	YNL279W	PRM1
YBR083W	TEC1	YLR414C	PUN1
YBR083W	TEC1	YLR084C	RAX2
YBR083W	TEC1	YFL047W	RGD2
YBR083W	TEC1	YIL119C	RPI1
YBR083W	TEC1	YDR041W	RSM10
YBR083W	TEC1	YOR315W	SFG1
YBR083W	TEC1	YJL145W	SFH5
YBR083W	TEC1	YER118C	SHO1
YBR083W	TEC1	YDR522C	SPS2
YBR083W	TEC1	YOR247W	SRL1
YBR083W	TEC1	YKR091W	SRL3
YBR083W	TEC1	YLR452C	SST2
YBR083W	TEC1	YHR084W	STE12
YBR083W	TEC1	YPL163C	SVS1
YBR083W	TEC1	YJL187C	SWE1
YBR083W	TEC1	YNL087W	TCB2
YBR083W	TEC1	YBR083W	TEC1
YBR083W	TEC1	YGR221C	TOS2
YBR083W	TEC1	YLR212C	TUB4
YBR083W	TEC1	YEL040W	UTR2
YBR083W	TEC1	YDL128W	VCX1
YBR083W	TEC1	YOL105C	WSC3
YBR083W	TEC1	YGL230C	YGL230C
YBR083W	TEC1	YGR039W	YGR039W
YBR083W	TEC1	YHR125W	YHR125W
YBR083W	TEC1	YKL095W	YJU2
YBR083W	TEC1	YLR413W	YLR413W
YBR083W	TEC1	YLR446W	YLR446W
YBR083W	TEC1	YOR296W	YOR296W
YBR182C	SMP1	YKL185W	ASH1
YBR182C	SMP1	YKL096W	CWP1
YBR182C	SMP1	YMR015C	ERG5
YBR182C	SMP1	YLR300W	EXG1
YBR182C	SMP1	YGL077C	HNM1
YBR182C	SMP1	YKL163W	PIR3
YBR182C	SMP1	YDR351W	SBE2
YBR182C	SMP1	YOR137C	SIA1
YBR182C	SMP1	YHR030C	SLT2
YBR182C	SMP1	YBR182C	SMP1
YBR182C	SMP1	YPL175W	SPT14
YBR182C	SMP1	YCR073C	SSK22
YBR182C	SMP1	YPL176C	TRE1
YBR182C	SMP1	YEL040W	UTR2
YDL056W	MBP1	YEL061C	CIN8
YDL056W	MBP1	YPR120C	CLB5
YDL056W	MBP1	YGR109C	CLB6
YDL056W	MBP1	YDR263C	DIN7
YDL056W	MBP1	YLR056W	ERG3
YDL056W	MBP1	YMR215W	GAS3
YDL056W	MBP1	YML004C	GLO1
YDL056W	MBP1	YDR528W	HLR1
YDL056W	MBP1	YBL003C	HTA2
YDL056W	MBP1	YIL026C	IRR1
YDL056W	MBP1	YOR372C	NDD1
YDL056W	MBP1	YOR373W	NUD1
YDL056W	MBP1	YNL289W	PCL1
YDL056W	MBP1	YDR113C	PDS1
YDL056W	MBP1	YDR501W	PLM2
YDL056W	MBP1	YNL312W	RFA2
YDL056W	MBP1	YER111C	SWI4
YDL056W	MBP1	YML100W	TSL1
YDL056W	MBP1	YER189W	YER189W
YDL056W	MBP1	YJL045W	YJL045W
YDL056W	MBP1	YJR030C	YJR030C
YDL056W	MBP1	YML003W	YML003W
YDR043C	NRG1	YKL096W	CWP1
YDR043C	NRG1	YNL111C	CYB5
YDR043C	NRG1	YDR403W	DIT1
YDR043C	NRG1	YDR402C	DIT2
YDR043C	NRG1	YDR040C	ENA1
YDR043C	NRG1	YER044C	ERG28
YDR043C	NRG1	YOR317W	FAA1
YDR043C	NRG1	YIL019W	FAF1
YDR043C	NRG1	YMR319C	FET4
YDR043C	NRG1	YKR102W	FLO10
YDR043C	NRG1	YLR454W	FMP27
YDR043C	NRG1	YNR060W	FRE4
YDR043C	NRG1	YER145C	FTR1
YDR043C	NRG1	YIL020C	HIS6
YDR043C	NRG1	YOR032C	HMS1
YDR043C	NRG1	YER146W	LSM5
YDR043C	NRG1	YER001W	MNN1
YDR043C	NRG1	YDR043C	NRG1
YDR043C	NRG1	YIL114C	POR2
YDR043C	NRG1	YDL090C	RAM1
YDR043C	NRG1	YJL217W	REE1
YDR043C	NRG1	YOR049C	RSB1
YDR043C	NRG1	YIL113W	SDP1
YDR043C	NRG1	YOR140W	SFL1
YDR043C	NRG1	YIL099W	SGA1
YDR043C	NRG1	YER096W	SHC1
YDR043C	NRG1	YDR536W	STL1
YDR043C	NRG1	YER011W	TIR1
YDR043C	NRG1	YGL096W	TOS8
YDR043C	NRG1	YLL028W	TPO1
YDR043C	NRG1	YOR273C	TPO4
YDR043C	NRG1	YPL230W	USV1
YDR043C	NRG1	YEL040W	UTR2
YDR043C	NRG1	YER158C	YER158C
YDR043C	NRG1	YHL041W	YHL041W
YDR043C	NRG1	YLL053C	YLL053C
YDR043C	NRG1	YLR012C	YLR012C
YDR043C	NRG1	YBR183W	YPC1
YDR146C	SWI5	YPL158C	AIM44
YDR146C	SWI5	YKL185W	ASH1
YDR146C	SWI5	YNL192W	CHS1
YDR146C	SWI5	YGR189C	CRH1
YDR146C	SWI5	YDL117W	CYK3
YDR146C	SWI5	YOR264W	DSE3
YDR146C	SWI5	YNL327W	EGT2
YDR146C	SWI5	YLR300W	EXG1
YDR146C	SWI5	YIL009W	FAA3
YDR146C	SWI5	YNL328C	MDJ2
YDR146C	SWI5	YKL186C	MTR2
YDR146C	SWI5	YNL078W	NIS1
YDR146C	SWI5	YDL127W	PCL2
YDR146C	SWI5	YDL179W	PCL9
YDR146C	SWI5	YGR086C	PIL1
YDR146C	SWI5	YKL164C	PIR1
YDR146C	SWI5	YDR055W	PST1
YDR146C	SWI5	YJL217W	REE1
YDR146C	SWI5	YLR079W	SIC1
YDR146C	SWI5	YNL032W	SIW14
YDR146C	SWI5	YBR083W	TEC1
YDR146C	SWI5	YPL157W	TGS1
YDR146C	SWI5	YBR071W	YBR071W
YDR146C	SWI5	YDL119C	YDL119C
YDR146C	SWI5	YLR049C	YLR049C
YDR146C	SWI5	YLR194C	YLR194C
YDR253C	MET32	YGR204W	ADE3
YDR253C	MET32	YJL060W	BNA3
YDR253C	MET32	YDR256C	CTA1
YDR253C	MET32	YAL012W	CYS3
YDR253C	MET32	YFR030W	MET10
YDR253C	MET32	YPR167C	MET16
YDR253C	MET32	YNL277W	MET2
YDR253C	MET32	YOL064C	MET22
YDR253C	MET32	YJR137C	MET5
YDR253C	MET32	YPR168W	NUT2
YDR253C	MET32	YDL059C	RAD59
YDR253C	MET32	YBR214W	SDS24
YDR253C	MET32	YLR092W	SUL2
YDR253C	MET32	YHR117W	TOM71
YDR253C	MET32	YDL058W	USO1
YDR259C	YAP6	YHR047C	AAP1
YDR259C	YAP6	YER073W	ALD5
YDR259C	YAP6	YPL061W	ALD6
YDR259C	YAP6	YLL052C	AQY2
YDR259C	YAP6	YML116W	ATR1
YDR259C	YAP6	YOR028C	CIN5
YDR259C	YAP6	YGR108W	CLB1
YDR259C	YAP6	YIR032C	DAL3
YDR259C	YAP6	YGR060W	ERG25
YDR259C	YAP6	YLR056W	ERG3
YDR259C	YAP6	YIL009W	FAA3
YDR259C	YAP6	YMR319C	FET4
YDR259C	YAP6	YIR019C	FLO11
YDR259C	YAP6	YOR381W	FRE3
YDR259C	YAP6	YHR049W	FSH1
YDR259C	YAP6	YKR039W	GAP1
YDR259C	YAP6	YIR013C	GAT4
YDR259C	YAP6	YOR032C	HMS1
YDR259C	YAP6	YJR158W	HXT16
YDR259C	YAP6	YJL219W	HXT9
YDR259C	YAP6	YBR157C	ICS2
YDR259C	YAP6	YOL157C	IMA2
YDR259C	YAP6	YIL172C	IMA3
YDR259C	YAP6	YJR094C	IME1
YDR259C	YAP6	YGR238C	KEL2
YDR259C	YAP6	YGR249W	MGA1
YDR259C	YAP6	YER028C	MIG3
YDR259C	YAP6	YOR177C	MPC54
YDR259C	YAP6	YOR161C	PNS1
YDR259C	YAP6	YJL217W	REE1
YDR259C	YAP6	YNL180C	RHO5
YDR259C	YAP6	YLR154C	RNH203
YDR259C	YAP6	YOR049C	RSB1
YDR259C	YAP6	YOR315W	SFG1
YDR259C	YAP6	YOR247W	SRL1
YDR259C	YAP6	YPR009W	SUT2
YDR259C	YAP6	YNL087W	TCB2
YDR259C	YAP6	YBR067C	TIP1
YDR259C	YAP6	YEL040W	UTR2
YDR259C	YAP6	YIL056W	VHR1
YDR259C	YAP6	YDR259C	YAP6
YDR259C	YAP6	YBL029W	YBL029W
YDR259C	YAP6	YGR234W	YHB1
YDR259C	YAP6	YJL218W	YJL218W
YDR259C	YAP6	YLL053C	YLL053C
YDR259C	YAP6	YLR413W	YLR413W
YDR259C	YAP6	YML131W	YML131W
YDR259C	YAP6	YMR320W	YMR320W
YDR259C	YAP6	YOL154W	ZPS1
YDR421W	ARO80	YDR421W	ARO80
YDR421W	ARO80	YHR139C	SPS100
YDR423C	CAD1	YKL103C	APE1
YDR423C	CAD1	YML116W	ATR1
YDR423C	CAD1	YMR038C	CCS1
YDR423C	CAD1	YKR071C	DRE2
YDR423C	CAD1	YBR047W	FMP23
YDR423C	CAD1	YJL101C	GSH1
YDR423C	CAD1	YLL060C	GTT2
YDR423C	CAD1	YOL119C	MCH4
YDR423C	CAD1	YKR052C	MRS4
YDR423C	CAD1	YKL040C	NFU1
YDR423C	CAD1	YPR048W	TAH18
YDR423C	CAD1	YDR135C	YCF1
YDR423C	CAD1	YDR132C	YDR132C
YDR423C	CAD1	YGR234W	YHB1
YDR423C	CAD1	YLR108C	YLR108C
YDR463W	STP1	YCL025C	AGP1
YDR463W	STP1	YDR046C	BAP3
YDR463W	STP1	YDR508C	GNP1
YEL009C	GCN4	YJL200C	ACO2
YEL009C	GCN4	YBR145W	ADH5
YEL009C	GCN4	YER073W	ALD5
YEL009C	GCN4	YOL058W	ARG1
YEL009C	GCN4	YJL071W	ARG2
YEL009C	GCN4	YJL088W	ARG3
YEL009C	GCN4	YHR018C	ARG4
YEL009C	GCN4	YER069W	ARG5,6
YEL009C	GCN4	YMR062C	ARG7
YEL009C	GCN4	YOL140W	ARG8
YEL009C	GCN4	YDR127W	ARO1
YEL009C	GCN4	YDR035W	ARO3
YEL009C	GCN4	YBR249C	ARO4
YEL009C	GCN4	YGL202W	ARO8
YEL009C	GCN4	YPR145W	ASN1
YEL009C	GCN4	YKR099W	BAS1
YEL009C	GCN4	YJR025C	BNA1
YEL009C	GCN4	YDR531W	CAB1
YEL009C	GCN4	YFL028C	CAF16
YEL009C	GCN4	YIL003W	CFD1
YEL009C	GCN4	YHR122W	CIA2
YEL009C	GCN4	YOR303W	CPA1
YEL009C	GCN4	YJR109C	CPA2
YEL009C	GCN4	YPR111W	DBF20
YEL009C	GCN4	YBL043W	ECM13
YEL009C	GCN4	YBR047W	FMP23
YEL009C	GCN4	YGR267C	FOL2
YEL009C	GCN4	YDL198C	GGC1
YEL009C	GCN4	YER040W	GLN3
YEL009C	GCN4	YER055C	HIS1
YEL009C	GCN4	YOR202W	HIS3
YEL009C	GCN4	YCL030C	HIS4
YEL009C	GCN4	YBR248C	HIS7
YEL009C	GCN4	YER052C	HOM3
YEL009C	GCN4	YNL004W	HRB1
YEL009C	GCN4	YDL066W	IDP1
YEL009C	GCN4	YJR016C	ILV3
YEL009C	GCN4	YLR355C	ILV5
YEL009C	GCN4	YCL009C	ILV6
YEL009C	GCN4	YLR451W	LEU3
YEL009C	GCN4	YNL104C	LEU4
YEL009C	GCN4	YOR108W	LEU9
YEL009C	GCN4	YIR034C	LYS1
YEL009C	GCN4	YBR115C	LYS2
YEL009C	GCN4	YDL182W	LYS20
YEL009C	GCN4	YNR050C	LYS9
YEL009C	GCN4	YDL054C	MCH1
YEL009C	GCN4	YOL119C	MCH4
YEL009C	GCN4	YOR221C	MCT1
YEL009C	GCN4	YGL125W	MET13
YEL009C	GCN4	YPR167C	MET16
YEL009C	GCN4	YOL064C	MET22
YEL009C	GCN4	YJR137C	MET5
YEL009C	GCN4	YHR162W	MPC2
YEL009C	GCN4	YOR201C	MRM1
YEL009C	GCN4	YBR255W	MTC4
YEL009C	GCN4	YNL240C	NAR1
YEL009C	GCN4	YIL164C	NIT1
YEL009C	GCN4	YNL129W	NRK1
YEL009C	GCN4	YOR222W	ODC2
YEL009C	GCN4	YOR130C	ORT1
YEL009C	GCN4	YHR071W	PCL5
YEL009C	GCN4	YGL059W	PKP2
YEL009C	GCN4	YPL188W	POS5
YEL009C	GCN4	YJL072C	PSF2
YEL009C	GCN4	YER089C	PTC2
YEL009C	GCN4	YKL015W	PUT3
YEL009C	GCN4	YBR218C	PYC2
YEL009C	GCN4	YBR043C	QDR3
YEL009C	GCN4	YCR106W	RDS1
YEL009C	GCN4	YBR256C	RIB5
YEL009C	GCN4	YMR063W	RIM9
YEL009C	GCN4	YGR161C	RTS3
YEL009C	GCN4	YPL273W	SAM4
YEL009C	GCN4	YNL311C	SKP2
YEL009C	GCN4	YMR095C	SNO1
YEL009C	GCN4	YMR096W	SNZ1
YEL009C	GCN4	YMR019W	STB4
YEL009C	GCN4	YKL072W	STB6
YEL009C	GCN4	YGL184C	STR3
YEL009C	GCN4	YOR337W	TEA1
YEL009C	GCN4	YCR053W	THR4
YEL009C	GCN4	YER090W	TRP2
YEL009C	GCN4	YKL211C	TRP3
YEL009C	GCN4	YDR354W	TRP4
YEL009C	GCN4	YDL170W	UGA3
YEL009C	GCN4	YDR341C	YDR341C
YEL009C	GCN4	YHR020W	YHR020W
YEL009C	GCN4	YIL165C	YIL165C
YEL009C	GCN4	YJR111C	YJR111C
YEL009C	GCN4	YJR154W	YJR154W
YEL009C	GCN4	YLR152C	YLR152C
YEL009C	GCN4	YPR058W	YMC1
YEL009C	GCN4	YBR104W	YMC2
YEL009C	GCN4	YFR049W	YMR31
YEL009C	GCN4	YOR302W	YOR302W
YEL009C	GCN4	YPL264C	YPL264C
YEL009C	GCN4	YBR046C	ZTA1
YER028C	MIG3	YEL070W	DSF1
YER028C	MIG3	YDR040C	ENA1
YER028C	MIG3	YAR050W	FLO1
YER028C	MIG3	YJR158W	HXT16
YER028C	MIG3	YDR343C	HXT6
YER028C	MIG3	YJL221C	IMA4
YER028C	MIG3	YGR289C	MAL11
YER028C	MIG3	YBR298C	MAL31
YER028C	MIG3	YDL214C	PRR2
YER028C	MIG3	YJR159W	SOR1
YER028C	MIG3	YHR033W	YHR033W
YER040W	GLN3	YPR145W	ASN1
YER040W	GLN3	YPR035W	GLN1
YER040W	GLN3	YDL171C	GLT1
YER040W	GLN3	YDL170W	UGA3
YER111C	SWI4	YNR044W	AGA1
YER111C	SWI4	YBR070C	ALG14
YER111C	SWI4	YJR148W	BAT2
YER111C	SWI4	YER177W	BMH1
YER111C	SWI4	YJL194W	CDC6
YER111C	SWI4	YNL298W	CLA4
YER111C	SWI4	YJL196C	ELO1
YER111C	SWI4	YLR056W	ERG3
YER111C	SWI4	YLR300W	EXG1
YER111C	SWI4	YMR306W	FKS3
YER111C	SWI4	YDR507C	GIN4
YER111C	SWI4	YCR065W	HCM1
YER111C	SWI4	YDR225W	HTA1
YER111C	SWI4	YFR017C	IGD1
YER111C	SWI4	YER112W	LSM4
YER111C	SWI4	YDL127W	PCL2
YER111C	SWI4	YNL231C	PDR16
YER111C	SWI4	YHR150W	PEX28
YER111C	SWI4	YDR501W	PLM2
YER111C	SWI4	YDR452W	PPN1
YER111C	SWI4	YPL024W	RMI1
YER111C	SWI4	YER070W	RNR1
YER111C	SWI4	YOR315W	SFG1
YER111C	SWI4	YHR149C	SKG6
YER111C	SWI4	YMR179W	SPT21
YER111C	SWI4	YLR055C	SPT8
YER111C	SWI4	YBR162C	TOS1
YER111C	SWI4	YNL300W	TOS6
YER111C	SWI4	YML100W	TSL1
YER111C	SWI4	YEL040W	UTR2
YER111C	SWI4	YBR071W	YBR071W
YFL021W	GAT1	YBR268W	MRPL37
YFL021W	GAT1	YHR179W	OYE2
YFL021W	GAT1	YJL210W	PEX2
YFL031W	HAC1	YOR198C	BFR1
YFL031W	HAC1	YHR044C	DOG1
YFL031W	HAC1	YHR043C	DOG2
YFL031W	HAC1	YBR180W	DTR1
YFL031W	HAC1	YFR041C	ERJ5
YFL031W	HAC1	YML130C	ERO1
YFL031W	HAC1	YAL007C	ERP2
YFL031W	HAC1	YDR518W	EUG1
YFL031W	HAC1	YJL091C	GWT1
YFL031W	HAC1	YDR540C	IRC4
YFL031W	HAC1	YJL073W	JEM1
YFL031W	HAC1	YJL034W	KAR2
YFL031W	HAC1	YOR099W	KTR1
YFL031W	HAC1	YKL073W	LHS1
YFL031W	HAC1	YDR503C	LPP1
YFL031W	HAC1	YKL165C	MCD4
YFL031W	HAC1	YCL044C	MGR1
YFL031W	HAC1	YNL249C	MPA43
YFL031W	HAC1	YKL074C	MUD2
YFL031W	HAC1	YGL126W	SCS3
YFL031W	HAC1	YOL031C	SIL1
YFL031W	HAC1	YJL035C	TAD2
YFL031W	HAC1	YFR026C	ULI1
YFL031W	HAC1	YDR400W	URH1
YFL031W	HAC1	YMR040W	YET2
YGL071W	AFT1	YGL071W	AFT1
YGL071W	AFT1	YDR264C	AKR1
YGL071W	AFT1	YHL040C	ARN1
YGL071W	AFT1	YHL047C	ARN2
YGL071W	AFT1	YDR270W	CCC2
YGL071W	AFT1	YLR214W	FRE1
YGL071W	AFT1	YLL051C	FRE6
YGL071W	AFT1	YER145C	FTR1
YGL071W	AFT1	YJL094C	KHA1
YGL071W	AFT1	YER146W	LSM5
YGL071W	AFT1	YDR265W	PEX10
YGL071W	AFT1	YOR137C	SIA1
YGL071W	AFT1	YLR136C	TIS11
YGL162W	SUT1	YPR192W	AQY1
YGL162W	SUT1	YDL037C	BSC1
YGL162W	SUT1	YOR349W	CIN1
YGL162W	SUT1	YPR013C	CMR3
YGL162W	SUT1	YDR256C	CTA1
YGL162W	SUT1	YKL096W	CWP1
YGL162W	SUT1	YPL265W	DIP5
YGL162W	SUT1	YBL043W	ECM13
YGL162W	SUT1	YMR136W	GAT2
YGL162W	SUT1	YDR309C	GIC2
YGL162W	SUT1	YDR096W	GIS1
YGL162W	SUT1	YCR098C	GIT1
YGL162W	SUT1	YDR508C	GNP1
YGL162W	SUT1	YKL109W	HAP4
YGL162W	SUT1	YOL156W	HXT11
YGL162W	SUT1	YJR158W	HXT16
YGL162W	SUT1	YMR011W	HXT2
YGL162W	SUT1	YDR343C	HXT6
YGL162W	SUT1	YBR157C	ICS2
YGL162W	SUT1	YJR119C	JHD2
YGL162W	SUT1	YPL056C	LCL1
YGL162W	SUT1	YOL126C	MDH2
YGL162W	SUT1	YOR211C	MGM1
YGL162W	SUT1	MIC14	MIC14
YGL162W	SUT1	YLR332W	MID2
YGL162W	SUT1	YER028C	MIG3
YGL162W	SUT1	YPR047W	MSF1
YGL162W	SUT1	YOR153W	PDR5
YGL162W	SUT1	YOL084W	PHM7
YGL162W	SUT1	YML123C	PHO84
YGL162W	SUT1	YIL122W	POG1
YGL162W	SUT1	YPL156C	PRM4
YGL162W	SUT1	YDL214C	PRR2
YGL162W	SUT1	YIL120W	QDR1
YGL162W	SUT1	YDR030C	RAD28
YGL162W	SUT1	YOR049C	RSB1
YGL162W	SUT1	YJL105W	SET4
YGL162W	SUT1	YOR315W	SFG1
YGL162W	SUT1	YIL099W	SGA1
YGL162W	SUT1	YMR016C	SOK2
YGL162W	SUT1	YHR136C	SPL2
YGL162W	SUT1	YLR341W	SPO77
YGL162W	SUT1	YOR212W	STE4
YGL162W	SUT1	YDL048C	STP4
YGL162W	SUT1	YGL162W	SUT1
YGL162W	SUT1	YPR009W	SUT2
YGL162W	SUT1	YAL064W	YAL064W
YGL162W	SUT1	YBR032W	YBR032W
YGL162W	SUT1	YDR090C	YDR090C
YGL162W	SUT1	YGL039W	YGL039W
YGL162W	SUT1	YGR035C	YGR035C
YGL162W	SUT1	YGR273C	YGR273C
YGL162W	SUT1	YHR125W	YHR125W
YGL162W	SUT1	YJL218W	YJL218W
YGL162W	SUT1	YKR041W	YKR041W
YGL162W	SUT1	YLR297W	YLR297W
YGL162W	SUT1	YLR413W	YLR413W
YGL162W	SUT1	YMR210W	YMR210W
YGL162W	SUT1	YNL144C	YNL144C
YGL162W	SUT1	YOR062C	YOR062C
YGL162W	SUT1	YBR183W	YPC1
YGL181W	GTS1	YDR525W	API2
YGL181W	GTS1	YNR069C	BSC5
YGL181W	GTS1	YLR013W	GAT3
YGL181W	GTS1	YGL251C	HFM1
YGL181W	GTS1	YDL245C	HXT15
YGL181W	GTS1	YOR255W	OSW1
YGL181W	GTS1	YFR023W	PES4
YGL181W	GTS1	YAL018C	YAL018C
YGL181W	GTS1	YFL012W	YFL012W
YGL181W	GTS1	YGL149W	YGL149W
YGL181W	GTS1	YGR066C	YGR066C
YGL181W	GTS1	YPR027C	YPR027C
YHL020C	OPI1	YBR029C	CDS1
YHL020C	OPI1	YNL130C	CPT1
YHL020C	OPI1	YDR147W	EKI1
YHL020C	OPI1	YPL231W	FAS2
YHL020C	OPI1	YJL153C	INO1
YHL020C	OPI1	YDR497C	ITR1
YHL020C	OPI1	YNL129W	NRK1
YHL020C	OPI1	YBR030W	RKM3
YHR006W	STP2	YCL025C	AGP1
YHR006W	STP2	YDR508C	GNP1
YHR084W	STE12	YNR044W	AGA1
YHR084W	STE12	YIL015W	BAR1
YHR084W	STE12	YCL027W	FUS1
YHR084W	STE12	YMR232W	FUS2
YHR084W	STE12	YBL016W	FUS3
YHR084W	STE12	YDR309C	GIC2
YHR084W	STE12	YHR005C	GPA1
YHR084W	STE12	YFL027C	GYP8
YHR084W	STE12	YCL055W	KAR4
YHR084W	STE12	YMR065W	KAR5
YHR084W	STE12	YDL127W	PCL2
YHR084W	STE12	YNL279W	PRM1
YHR084W	STE12	YPL192C	PRM3
YHR084W	STE12	YPL156C	PRM4
YHR084W	STE12	YML047C	PRM6
YHR084W	STE12	YLR452C	SST2
YHR084W	STE12	YHR084W	STE12
YHR084W	STE12	YFL026W	STE2
YHR084W	STE12	YKL209C	STE6
YHR084W	STE12	YBR083W	TEC1
YHR178W	STB5	YHR183W	GND1
YHR178W	STB5	YNL274C	GOR1
YHR178W	STB5	YDR232W	HEM1
YHR178W	STB5	YDL049C	KNH1
YHR178W	STB5	YMR272C	SCS7
YHR178W	STB5	YDR011W	SNQ2
YHR178W	STB5	YHR163W	SOL3
YHR178W	STB5	YLR354C	TAL1
YHR178W	STB5	YPR074C	TKL1
YHR178W	STB5	YDR248C	YDR248C
YHR178W	STB5	YEL041W	YEF1
YHR178W	STB5	YLR152C	YLR152C
YHR178W	STB5	YMR315W	YMR315W
YHR206W	SKN7	YLR109W	AHP1
YHR206W	SKN7	YGR225W	AMA1
YHR206W	SKN7	YLR110C	CCW12
YHR206W	SKN7	YJL158C	CIS3
YHR206W	SKN7	YDR155C	CPR1
YHR206W	SKN7	YGR088W	CTT1
YHR206W	SKN7	YKL096W-A	CWP2
YHR206W	SKN7	YOL052C-A	DDR2
YHR206W	SKN7	YMR173W	DDR48
YHR206W	SKN7	YBR078W	ECM33
YHR206W	SKN7	YGR060W	ERG25
YHR206W	SKN7	YCL058C	FYV5
YHR206W	SKN7	YMR307W	GAS1
YHR206W	SKN7	YMR136W	GAT2
YHR206W	SKN7	YDR309C	GIC2
YHR206W	SKN7	YNL014W	HEF3
YHR206W	SKN7	YLR205C	HMX1
YHR206W	SKN7	YMR251W-A	HOR7
YHR206W	SKN7	YMR195W	ICY1
YHR206W	SKN7	YEL044W	IES6
YHR206W	SKN7	YDL049C	KNH1
YHR206W	SKN7	YLL019C	KNS1
YHR206W	SKN7	YDL182W	LYS20
YHR206W	SKN7	YOL060C	MAM3
YHR206W	SKN7	YNL173C	MDG1
YHR206W	SKN7	YGL125W	MET13
YHR206W	SKN7	YGR249W	MGA1
YHR206W	SKN7	YKL062W	MSN4
YHR206W	SKN7	YJL116C	NCA3
YHR206W	SKN7	YDR043C	NRG1
YHR206W	SKN7	YIL013C	PDR11
YHR206W	SKN7	YGR086C	PIL1
YHR206W	SKN7	YEL017C-A	PMP2
YHR206W	SKN7	YKR013W	PRY2
YHR206W	SKN7	YER075C	PTP3
YHR206W	SKN7	YKR093W	PTR2
YHR206W	SKN7	YOR348C	PUT4
YHR206W	SKN7	YOR107W	RGS2
YHR206W	SKN7	YPL024W	RMI1
YHR206W	SKN7	YPR065W	ROX1
YHR206W	SKN7	YML091C	RPM2
YHR206W	SKN7	YMR305C	SCW10
YHR206W	SKN7	YIL099W	SGA1
YHR206W	SKN7	YDL048C	STP4
YHR206W	SKN7	YPR151C	SUE1
YHR206W	SKN7	YPR009W	SUT2
YHR206W	SKN7	YBR083W	TEC1
YHR206W	SKN7	YDR007W	TRP1
YHR206W	SKN7	YJL048C	UBX6
YHR206W	SKN7	YKR042W	UTH1
YHR206W	SKN7	YML007W	YAP1
YHR206W	SKN7	YBL029W	YBL029W
YHR206W	SKN7	YIL165C	YIL165C
YHR206W	SKN7	YJL107C	YJL107C
YHR206W	SKN7	YLR108C	YLR108C
YHR206W	SKN7	YLR257W	YLR257W
YJL056C	ZAP1	YNL254C	RTC4
YJL056C	ZAP1	YJL056C	ZAP1
YJL056C	ZAP1	YGL255W	ZRT1
YJL056C	ZAP1	YLR130C	ZRT2
YJL056C	ZAP1	YKL175W	ZRT3
YJR060W	CBF1	YNL220W	ADE12
YJR060W	CBF1	YGR204W	ADE3
YJR060W	CBF1	YER017C	AFG3
YJR060W	CBF1	YNL094W	APP1
YJR060W	CBF1	YLR155C	ASP3-1
YJR060W	CBF1	YLR157C	ASP3-2
YJR060W	CBF1	YLR158C	ASP3-3
YJR060W	CBF1	YLR160C	ASP3-4
YJR060W	CBF1	YNL223W	ATG4
YJR060W	CBF1	YKL016C	ATP7
YJR060W	CBF1	YIL088C	AVT7
YJR060W	CBF1	YER177W	BMH1
YJR060W	CBF1	YER114C	BOI2
YJR060W	CBF1	YCR047C	BUD23
YJR060W	CBF1	YJR060W	CBF1
YJR060W	CBF1	YJL158C	CIS3
YJR060W	CBF1	YOR039W	CKB2
YJR060W	CBF1	YPL170W	DAP1
YJR060W	CBF1	YKL191W	DPH2
YJR060W	CBF1	YAL026C	DRS2
YJR060W	CBF1	YFL024C	EPL1
YJR060W	CBF1	YJL167W	ERG20
YJR060W	CBF1	YPL221W	FLC1
YJR060W	CBF1	YLR081W	GAL2
YJR060W	CBF1	YHR089C	GAR1
YJR060W	CBF1	YEL046C	GLY1
YJR060W	CBF1	YPL250C	ICY2
YJR060W	CBF1	YNL037C	IDH1
YJR060W	CBF1	YEL044W	IES6
YJR060W	CBF1	YJR138W	IML1
YJR060W	CBF1	YOR099W	KTR1
YJR060W	CBF1	YFR030W	MET10
YJR060W	CBF1	YNL277W	MET2
YJR060W	CBF1	YIR017C	MET28
YJR060W	CBF1	YJR010W	MET3
YJR060W	CBF1	YJR137C	MET5
YJR060W	CBF1	YHL004W	MRP4
YJR060W	CBF1	YCR092C	MSH3
YJR060W	CBF1	YNL036W	NCE103
YJR060W	CBF1	NHP6b	NHP6b
YJR060W	CBF1	YPL171C	OYE3
YJR060W	CBF1	YBR222C	PCS60
YJR060W	CBF1	YOL136C	PFK27
YJR060W	CBF1	YPL206C	PGC1
YJR060W	CBF1	YJL117W	PHO86
YJR060W	CBF1	YNL221C	POP1
YJR060W	CBF1	YER099C	PRS2
YJR060W	CBF1	YDR055W	PST1
YJR060W	CBF1	YER094C	PUP3
YJR060W	CBF1	YBR049C	REB1
YJR060W	CBF1	YEL024W	RIP1
YJR060W	CBF1	YEL072W	RMD6
YJR060W	CBF1	YDL020C	RPN4
YJR060W	CBF1	YCR045C	RRT12
YJR060W	CBF1	YHR056C	RSC30
YJR060W	CBF1	YPL094C	SEC62
YJR060W	CBF1	YIL074C	SER33
YJR060W	CBF1	YHR098C	SFB3
YJR060W	CBF1	YMR216C	SKY1
YJR060W	CBF1	YDR510W	SMT3
YJR060W	CBF1	YOR327C	SNC2
YJR060W	CBF1	YHR136C	SPL2
YJR060W	CBF1	YBR250W	SPO23
YJR060W	CBF1	YNL224C	SQS1
YJR060W	CBF1	YIL126W	STH1
YJR060W	CBF1	YLR092W	SUL2
YJR060W	CBF1	YJR009C	TDH2
YJR060W	CBF1	YBR091C	TIM12
YJR060W	CBF1	YHR099W	TRA1
YJR060W	CBF1	YER100W	UBC6
YJR060W	CBF1	YLL055W	YCT1
YJR060W	CBF1	YLR149C	YLR149C
YJR060W	CBF1	YOR064C	YNG1
YJR060W	CBF1	YNL095C	YNL095C
YKL015W	PUT3	YOR303W	CPA1
YKL015W	PUT3	YBL032W	HEK2
YKL015W	PUT3	YBL063W	KIP1
YKL015W	PUT3	YBR230C	OM14
YKL015W	PUT3	YBL033C	RIB1
YKL015W	PUT3	YLR139C	SLS1
YKL015W	PUT3	YGL104C	VPS73
YKL015W	PUT3	YJL045W	YJL045W
YKL015W	PUT3	YOR302W	YOR302W
YKL038W	RGT1	YHR094C	HXT1
YKL038W	RGT1	YGL209W	MIG2
YKL038W	RGT1	YER028C	MIG3
YKL038W	RGT1	YBR001C	NTH2
YKL038W	RGT1	YKR075C	YKR075C
YKL043W	PHD1	YER073W	ALD5
YKL043W	PHD1	YJL158C	CIS3
YKL043W	PHD1	YPL177C	CUP9
YKL043W	PHD1	YKL096W	CWP1
YKL043W	PHD1	YEL039C	CYC7
YKL043W	PHD1	YMR173W	DDR48
YKL043W	PHD1	YLR401C	DUS3
YKL043W	PHD1	YBL043W	ECM13
YKL043W	PHD1	YIL009W	FAA3
YKL043W	PHD1	YMR319C	FET4
YKL043W	PHD1	YHR049W	FSH1
YKL043W	PHD1	YER145C	FTR1
YKL043W	PHD1	YMR136W	GAT2
YKL043W	PHD1	YCR098C	GIT1
YKL043W	PHD1	YHR005C	GPA1
YKL043W	PHD1	YFL027C	GYP8
YKL043W	PHD1	YDR047W	HEM12
YKL043W	PHD1	YDR044W	HEM13
YKL043W	PHD1	YJR147W	HMS2
YKL043W	PHD1	YHR094C	HXT1
YKL043W	PHD1	YMR011W	HXT2
YKL043W	PHD1	YDR345C	HXT3
YKL043W	PHD1	YJL219W	HXT9
YKL043W	PHD1	YBR157C	ICS2
YKL043W	PHD1	YKL161C	KDX1
YKL043W	PHD1	YER028C	MIG3
YKL043W	PHD1	YER001W	MNN1
YKL043W	PHD1	YPR149W	NCE102
YKL043W	PHD1	YLR044C	PDC1
YKL043W	PHD1	YAR071W	PHO11
YKL043W	PHD1	YDR481C	PHO8
YKL043W	PHD1	YOR161C	PNS1
YKL043W	PHD1	YBL068W	PRS4
YKL043W	PHD1	YJL217W	REE1
YKL043W	PHD1	YOR107W	RGS2
YKL043W	PHD1	YPR065W	ROX1
YKL043W	PHD1	YOR049C	RSB1
YKL043W	PHD1	YMR266W	RSN1
YKL043W	PHD1	YOR315W	SFG1
YKL043W	PHD1	YIL099W	SGA1
YKL043W	PHD1	YOR179C	SYC1
YKL043W	PHD1	YBR067C	TIP1
YKL043W	PHD1	YOR344C	TYE7
YKL043W	PHD1	YEL040W	UTR2
YKL043W	PHD1	YHL028W	WSC4
YKL043W	PHD1	YBL029W	YBL029W
YKL043W	PHD1	YBL044W	YBL044W
YKL043W	PHD1	YHL044W	YHL044W
YKL043W	PHD1	YJL218W	YJL218W
YKL043W	PHD1	YKL095W	YJU2
YKL043W	PHD1	YLR278C	YLR278C
YKL043W	PHD1	YLR413W	YLR413W
YKL043W	PHD1	YNL144C	YNL144C
YKL043W	PHD1	YOR062C	YOR062C
YKL043W	PHD1	ZMS1	ZMS1
YKL043W	PHD1	YER033C	ZRG8
YKL109W	HAP4	YPR145W	ASN1
YKL109W	HAP4	YBL099W	ATP1
YKL109W	HAP4	YLR295C	ATP14
YKL109W	HAP4	YPL271W	ATP15
YKL109W	HAP4	YDL004W	ATP16
YKL109W	HAP4	YDR377W	ATP17
YKL109W	HAP4	YJR121W	ATP2
YKL109W	HAP4	YPR020W	ATP20
YKL109W	HAP4	YBR039W	ATP3
YKL109W	HAP4	YDR298C	ATP5
YKL109W	HAP4	YKL016C	ATP7
YKL109W	HAP4	YBL045C	COR1
YKL109W	HAP4	YLR038C	COX12
YKL109W	HAP4	YGL191W	COX13
YKL109W	HAP4	YGL187C	COX4
YKL109W	HAP4	COX5a	COX5a
YKL109W	HAP4	YHR051W	COX6
YKL109W	HAP4	YMR256C	COX7
YKL109W	HAP4	YLR395C	COX8
YKL109W	HAP4	YDL067C	COX9
YKL109W	HAP4	YJR048W	CYC1
YKL109W	HAP4	YOR065W	CYT1
YKL109W	HAP4	YPL262W	FUM1
YKL109W	HAP4	YJL103C	GSM1
YKL109W	HAP4	YDL181W	INH1
YKL109W	HAP4	YIL125W	KGD1
YKL109W	HAP4	YDR148C	KGD2
YKL109W	HAP4	YKL085W	MDH1
YKL109W	HAP4	YJL102W	MEF2
YKL109W	HAP4	YJR077C	MIR1
YKL109W	HAP4	YMR145C	NDE1
YKL109W	HAP4	YML120C	NDI1
YKL109W	HAP4	YBL030C	PET9
YKL109W	HAP4	YNL055C	POR1
YKL109W	HAP4	YPR191W	QCR2
YKL109W	HAP4	YFR033C	QCR6
YKL109W	HAP4	YDR529C	QCR7
YKL109W	HAP4	YJL166W	QCR8
YKL109W	HAP4	YGR183C	QCR9
YKL109W	HAP4	YEL024W	RIP1
YKL109W	HAP4	YML091C	RPM2
YKL109W	HAP4	YKL148C	SDH1
YKL109W	HAP4	YKL141W	SDH3
YKL109W	HAP4	YDR178W	SDH4
YKL109W	HAP4	YDR322C-A	TIM11
YKL109W	HAP4	YOR187W	TUF1
YKL109W	HAP4	YLR168C	UPS2
YKL222C	S000001705	YKL221W	MCH2
YKL222C	S000001705	YLL028W	TPO1
YKR099W	BAS1	YNL220W	ADE12
YKR099W	BAS1	YLR359W	ADE13
YKR099W	BAS1	YMR120C	ADE17
YKR099W	BAS1	YOR128C	ADE2
YKR099W	BAS1	YGR204W	ADE3
YKR099W	BAS1	YMR300C	ADE4
YKR099W	BAS1	YGL234W	ADE5,7
YKR099W	BAS1	YGR061C	ADE6
YKR099W	BAS1	YDR408C	ADE8
YKR099W	BAS1	YER061C	CEM1
YKR099W	BAS1	YDR019C	GCV1
YKR099W	BAS1	YAL044C	GCV3
YKR099W	BAS1	YCL030C	HIS4
YKR099W	BAS1	YLL027W	ISA1
YKR099W	BAS1	YER091C	MET6
YKR099W	BAS1	YKR080W	MTD1
YKR099W	BAS1	YNL221C	POP1
YKR099W	BAS1	YLR058C	SHM2
YKR099W	BAS1	YFL059W	SNZ3
YKR099W	BAS1	YGL186C	TPN1
YKR099W	BAS1	YDR018C	YDR018C
YKR099W	BAS1	YMR243C	ZRC1
YLR131C	ACE2	YBR158W	AMN1
YLR131C	ACE2	YNL269W	BSC4
YLR131C	ACE2	YGR041W	BUD9
YLR131C	ACE2	YPR105C	COG4
YLR131C	ACE2	YOR316C	COT1
YLR131C	ACE2	YLR286C	CTS1
YLR131C	ACE2	YER124C	DSE1
YLR131C	ACE2	YHR143W	DSE2
YLR131C	ACE2	YOR264W	DSE3
YLR131C	ACE2	YNL327W	EGT2
YLR131C	ACE2	YIL009W	FAA3
YLR131C	ACE2	YFL021W	GAT1
YLR131C	ACE2	YLR258W	GSY2
YLR131C	ACE2	YJR147W	HMS2
YLR131C	ACE2	YPR106W	ISR1
YLR131C	ACE2	YNL328C	MDJ2
YLR131C	ACE2	YNL078W	NIS1
YLR131C	ACE2	YER154W	OXA1
YLR131C	ACE2	YDL127W	PCL2
YLR131C	ACE2	YDL179W	PCL9
YLR131C	ACE2	YJL078C	PRY3
YLR131C	ACE2	YDL055C	PSA1
YLR131C	ACE2	YGL229C	SAP4
YLR131C	ACE2	YGL028C	SCW11
YLR131C	ACE2	YBR162C	TOS1
YLR131C	ACE2	YPL230W	USV1
YLR131C	ACE2	YER152C	YER152C
YLR176C	RFX1	YOR269W	PAC1
YLR176C	RFX1	YJL026W	RNR2
YLR176C	RFX1	YGR180C	RNR4
YLR176C	RFX1	YLR034C	SMF3
YLR176C	RFX1	YMR279C	YMR279C
YLR176C	RFX1	YOR268C	YOR268C
YLR176C	RFX1	YOR378W	YOR378W
YLR256W	HAP1	YLR153C	ACS2
YLR256W	HAP1	YJR047C	ANB1
YLR256W	HAP1	YNR019W	ARE2
YLR256W	HAP1	YML054C	CYB2
YLR256W	HAP1	YNL111C	CYB5
YLR256W	HAP1	YJR048W	CYC1
YLR256W	HAP1	YOR065W	CYT1
YLR256W	HAP1	YHR007C	ERG11
YLR256W	HAP1	YML126C	ERG13
YLR256W	HAP1	YMR202W	ERG2
YLR256W	HAP1	YGR060W	ERG25
YLR256W	HAP1	YGL001C	ERG26
YLR256W	HAP1	YER044C	ERG28
YLR256W	HAP1	YMR015C	ERG5
YLR256W	HAP1	YHR190W	ERG9
YLR256W	HAP1	YLR214W	FRE1
YLR256W	HAP1	YLR256W	HAP1
YLR256W	HAP1	YML075C	HMG1
YLR256W	HAP1	YLR205C	HMX1
YLR256W	HAP1	YEL034W	HYP2
YLR256W	HAP1	YNR043W	MVD1
YLR256W	HAP1	YMR145C	NDE1
YLR256W	HAP1	YGL055W	OLE1
YLR256W	HAP1	YOR348C	PUT4
YLR256W	HAP1	YGR049W	SCM4
YLR256W	HAP1	YPR151C	SUE1
YLR256W	HAP1	YJL048C	UBX6
YLR256W	HAP1	YGR234W	YHB1
YLR451W	LEU3	YER073W	ALD5
YLR451W	LEU3	YBR068C	BAP2
YLR451W	LEU3	YHR208W	BAT1
YLR451W	LEU3	YOR271C	FSF1
YLR451W	LEU3	YMR108W	ILV2
YLR451W	LEU3	YJR016C	ILV3
YLR451W	LEU3	YLR355C	ILV5
YLR451W	LEU3	YOR226C	ISU2
YLR451W	LEU3	YGL009C	LEU1
YLR451W	LEU3	YNL104C	LEU4
YLR451W	LEU3	YOR108W	LEU9
YLR451W	LEU3	YKL120W	OAC1
YML007W	YAP1	YMR318C	ADH6
YML007W	YAP1	YLR109W	AHP1
YML007W	YAP1	YHR199C	AIM46
YML007W	YAP1	YPL061W	ALD6
YML007W	YAP1	YML116W	ATR1
YML007W	YAP1	YMR038C	CCS1
YML007W	YAP1	YKR071C	DRE2
YML007W	YAP1	YML008C	ERG6
YML007W	YAP1	YBR244W	GPX2
YML007W	YAP1	YJL101C	GSH1
YML007W	YAP1	YLL060C	GTT2
YML007W	YAP1	YDR533C	HSP31
YML007W	YAP1	YOR226C	ISU2
YML007W	YAP1	YKR052C	MRS4
YML007W	YAP1	YHR179W	OYE2
YML007W	YAP1	YPL171C	OYE3
YML007W	YAP1	YOL115W	PAP2
YML007W	YAP1	YNL231C	PDR16
YML007W	YAP1	YDR003W	RCR2
YML007W	YAP1	YJR104C	SOD1
YML007W	YAP1	YKL086W	SRX1
YML007W	YAP1	YGR209C	TRX2
YML007W	YAP1	YML028W	TSA1
YML007W	YAP1	YML007W	YAP1
YML007W	YAP1	YCR102C	YCR102C
YML007W	YAP1	YDL124W	YDL124W
YML007W	YAP1	YDL180W	YDL180W
YML007W	YAP1	YDR132C	YDR132C
YML007W	YAP1	YHR048W	YHK8
YML007W	YAP1	YIL169C	YIL169C
YML007W	YAP1	YJL045W	YJL045W
YML007W	YAP1	YKL071W	YKL071W
YML007W	YAP1	YLR108C	YLR108C
YML007W	YAP1	YLR346C	YLR346C
YML007W	YAP1	YLR460C	YLR460C
YML007W	YAP1	YML131W	YML131W
YML007W	YAP1	YNL134C	YNL134C
YML027W	YOX1	YDR191W	HST4
YML027W	YOX1	YLR274W	MCM5
YML027W	YOX1	YNL145W	MFA2
YML099C	ARG81	YML099C	ARG81
YML099C	ARG81	YPL265W	DIP5
YML099C	ARG81	YHR179W	OYE2
YMR016C	SOK2	YER045C	ACA1
YMR016C	SOK2	YLL052C	AQY2
YMR016C	SOK2	YGR108W	CLB1
YMR016C	SOK2	YPR013C	CMR3
YMR016C	SOK2	YBL043W	ECM13
YMR016C	SOK2	YDR040C	ENA1
YMR016C	SOK2	YMR319C	FET4
YMR016C	SOK2	YMR136W	GAT2
YMR016C	SOK2	YMR135C	GID8
YMR016C	SOK2	YCR098C	GIT1
YMR016C	SOK2	YFL027C	GYP8
YMR016C	SOK2	YHR094C	HXT1
YMR016C	SOK2	YJR158W	HXT16
YMR016C	SOK2	YDR343C	HXT6
YMR016C	SOK2	YKL110C	KTI12
YMR016C	SOK2	YGR249W	MGA1
YMR016C	SOK2	YDL039C	PRM7
YMR016C	SOK2	YDL214C	PRR2
YMR016C	SOK2	YGL158W	RCK1
YMR016C	SOK2	YIL119C	RPI1
YMR016C	SOK2	YDR077W	SED1
YMR016C	SOK2	YMR017W	SPO20
YMR016C	SOK2	YFL026W	STE2
YMR016C	SOK2	YLR237W	THI7
YMR016C	SOK2	YGL096W	TOS8
YMR016C	SOK2	YBL029W	YBL029W
YMR016C	SOK2	YER158C	YER158C
YMR016C	SOK2	YJL218W	YJL218W
YMR016C	SOK2	YLL053C	YLL053C
YMR016C	SOK2	YER033C	ZRG8
YMR021C	MAC1	YLR213C	CRR1
YMR021C	MAC1	YPR124W	CTR1
YMR021C	MAC1	YPL177C	CUP9
YMR021C	MAC1	YMR319C	FET4
YMR021C	MAC1	YLR214W	FRE1
YMR021C	MAC1	YOL152W	FRE7
YMR021C	MAC1	YER145C	FTR1
YMR021C	MAC1	YIL112W	HOS4
YMR021C	MAC1	YJR050W	ISY1
YMR021C	MAC1	YGR136W	LSB1
YMR021C	MAC1	YER146W	LSM5
YMR021C	MAC1	YBR297W	MAL33
YMR021C	MAC1	YNL250W	RAD50
YMR021C	MAC1	YJL217W	REE1
YMR021C	MAC1	YJR049C	UTR1
YMR021C	MAC1	YFR016C	YFR016C
YMR021C	MAC1	YKL063C	YKL063C
YMR021C	MAC1	YLL058W	YLL058W
YMR042W	ARG80	YJL088W	ARG3
YMR042W	ARG80	YER069W	ARG5,6
YMR042W	ARG80	YOR303W	CPA1
YMR042W	ARG80	YOR302W	YOR302W
YMR043W	MCM1	YER069W	ARG5,6
YMR043W	MCM1	YOR108W	LEU9
YMR043W	MCM1	YOR066W	MSA1
YNL103W	MET4	YGR204W	ADE3
YNL103W	MET4	YGR157W	CHO2
YNL103W	MET4	YAL012W	CYS3
YNL103W	MET4	YBR078W	ECM33
YNL103W	MET4	YNL031C	HHT2
YNL103W	MET4	YLR432W	IMD3
YNL103W	MET4	YFR030W	MET10
YNL103W	MET4	YNL277W	MET2
YNL103W	MET4	YIR017C	MET28
YNL103W	MET4	YGR055W	MUP1
YNL103W	MET4	YJL212C	OPT1
YNL103W	MET4	YJL210W	PEX2
YNL103W	MET4	RPL7b	RPL7b
YNL103W	MET4	YLR180W	SAM1
YNL103W	MET4	YIL074C	SER33
YNL103W	MET4	YGL184C	STR3
YNL103W	MET4	YJL048C	UBX6
YNL103W	MET4	YLR179C	YLR179C
YNL103W	MET4	YNL034W	YNL034W
YNL199C	GCR2	YER177W	BMH1
YNL199C	GCR2	YKL060C	FBA1
YNL199C	GCR2	YKL152C	GPM1
YNL199C	GCR2	YLR044C	PDC1
YNL199C	GCR2	YBR196C	PGI1
YNL199C	GCR2	YJR009C	TDH2
YNL199C	GCR2	YGR192C	TDH3
YNL199C	GCR2	YDR050C	TPI1
YNL314W	DAL82	YLR438W	CAR2
YNL314W	DAL82	YIR027C	DAL1
YNL314W	DAL82	YIR028W	DAL4
YNL314W	DAL82	YLR437C	DIF1
YOL067C	RTG1	YBL097W	BRN1
YOL067C	RTG1	YKL071W	YKL071W
YOL089C	HAL9	YPL171C	OYE3
YOL089C	HAL9	YOL084W	PHM7
YOL089C	HAL9	YGR271W	SLH1
YOL089C	HAL9	YDR520C	URC2
YOL108C	INO4	YGR037C	ACB1
YOL108C	INO4	YGR204W	ADE3
YOL108C	INO4	YBR145W	ADH5
YOL108C	INO4	YDR226W	ADK1
YOL108C	INO4	YJR105W	ADO1
YOL108C	INO4	YBL037W	APL3
YOL108C	INO4	YDR441C	APT2
YOL108C	INO4	YHR018C	ARG4
YOL108C	INO4	YLR155C	ASP3-1
YOL108C	INO4	YLR158C	ASP3-3
YOL108C	INO4	YJL178C	ATG27
YOL108C	INO4	YMR301C	ATM1
YOL108C	INO4	YJR078W	BNA2
YOL108C	INO4	YLR267W	BOP2
YOL108C	INO4	YDR275W	BSC2
YOL108C	INO4	YLR438W	CAR2
YOL108C	INO4	YBR120C	CBP6
YOL108C	INO4	YDR270W	CCC2
YOL108C	INO4	YLR115W	CFT2
YOL108C	INO4	YER026C	CHO1
YOL108C	INO4	YGR157W	CHO2
YOL108C	INO4	YLR133W	CKI1
YOL108C	INO4	YBL045C	COR1
YOL108C	INO4	YHR116W	COX23
YOL108C	INO4	YDR155C	CPR1
YOL108C	INO4	YLR380W	CSR1
YOL108C	INO4	YML054C	CYB2
YOL108C	INO4	YEL039C	CYC7
YOL108C	INO4	YGR155W	CYS4
YOL108C	INO4	YOR065W	CYT1
YOL108C	INO4	YHR115C	DMA1
YOL108C	INO4	YGL196W	DSD1
YOL108C	INO4	YMR176W	ECM5
YOL108C	INO4	YER035W	EDC2
YOL108C	INO4	YPL037C	EGD1
YOL108C	INO4	YBR177C	EHT1
YOL108C	INO4	YDR147W	EKI1
YOL108C	INO4	YHR123W	EPT1
YOL108C	INO4	YOR393W	ERR1
YOL108C	INO4	YPL281C	ERR2
YOL108C	INO4	YMR323W	ERR3
YOL108C	INO4	YNL125C	ESBP6
YOL108C	INO4	YOR317W	FAA1
YOL108C	INO4	YMR029C	FAR8
YOL108C	INO4	YPL231W	FAS2
YOL108C	INO4	YGR131W	FHN1
YOL108C	INO4	YER004W	FMP52
YOL108C	INO4	YLR081W	GAL2
YOL108C	INO4	YBR018C	GAL7
YOL108C	INO4	YOR120W	GCY1
YOL108C	INO4	YDR309C	GIC2
YOL108C	INO4	YMR135C	GID8
YOL108C	INO4	YCR098C	GIT1
YOL108C	INO4	YEL046C	GLY1
YOL108C	INO4	YDR508C	GNP1
YOL108C	INO4	YJL101C	GSH1
YOL108C	INO4	YFR015C	GSY1
YOL108C	INO4	YGR154C	GTO1
YOL108C	INO4	YPR005C	HAL1
YOL108C	INO4	YKL109W	HAP4
YOL108C	INO4	YNL030W	HHF2
YOL108C	INO4	YML075C	HMG1
YOL108C	INO4	YDR174W	HMO1
YOL108C	INO4	YLR205C	HMX1
YOL108C	INO4	YGL077C	HNM1
YOL108C	INO4	YLR301W	HRI1
YOL108C	INO4	YPL280W	HSP32
YOL108C	INO4	YOR391C	HSP33
YOL108C	INO4	YPL015C	HST2
YOL108C	INO4	YHR067W	HTD2
YOL108C	INO4	YGL253W	HXK2
YOL108C	INO4	YDL245C	HXT15
YOL108C	INO4	YJR158W	HXT16
YOL108C	INO4	YMR011W	HXT2
YOL108C	INO4	YDR345C	HXT3
YOL108C	INO4	YNL037C	IDH1
YOL108C	INO4	YJL146W	IDS2
YOL108C	INO4	YJL153C	INO1
YOL108C	INO4	YDR123C	INO2
YOL108C	INO4	YOL108C	INO4
YOL108C	INO4	YPL017C	IRC15
YOL108C	INO4	YDR497C	ITR1
YOL108C	INO4	YKL217W	JEN1
YOL108C	INO4	YDL049C	KNH1
YOL108C	INO4	YKL008C	LAC1
YOL108C	INO4	YNL239W	LAP3
YOL108C	INO4	YDR499W	LCD1
YOL108C	INO4	YHR081W	LRP1
YOL108C	INO4	YBR297W	MAL33
YOL108C	INO4	YOR306C	MCH5
YOL108C	INO4	YOR174W	MED4
YOL108C	INO4	YNL103W	MET4
YOL108C	INO4	YER091C	MET6
YOL108C	INO4	YJR008W	MHO1
YOL108C	INO4	YGL209W	MIG2
YOL108C	INO4	YJR074W	MOG1
YOL108C	INO4	YHL004W	MRP4
YOL108C	INO4	YMR037C	MSN2
YOL108C	INO4	YDR277C	MTH1
YOL108C	INO4	YNL240C	NAR1
YOL108C	INO4	YLR351C	NIT3
YOL108C	INO4	YNL129W	NRK1
YOL108C	INO4	YML103C	NUP188
YOL108C	INO4	YBR230C	OM14
YOL108C	INO4	YHL020C	OPI1
YOL108C	INO4	YJR073C	OPI3
YOL108C	INO4	YPR194C	OPT2
YOL108C	INO4	YLR350W	ORM2
YOL108C	INO4	YPL282C	PAU22
YOL108C	INO4	YNR076W	PAU6
YOL108C	INO4	YNL015W	PBI2
YOL108C	INO4	YPL058C	PDR12
YOL108C	INO4	YBL030C	PET9
YOL108C	INO4	YLR191W	PEX13
YOL108C	INO4	YER003C	PMI40
YOL108C	INO4	YNL221C	POP1
YOL108C	INO4	YBL064C	PRX1
YOL108C	INO4	YNL169C	PSD1
YOL108C	INO4	YKR093W	PTR2
YOL108C	INO4	YGL062W	PYC1
YOL108C	INO4	YBR114W	RAD16
YOL108C	INO4	YGR258C	RAD2
YOL108C	INO4	YCL001W	RER1
YOL108C	INO4	YOR107W	RGS2
YOL108C	INO4	RPL41a	RPL41a
YOL108C	INO4	YMR030W	RSF1
YOL108C	INO4	YOR138C	RUP1
YOL108C	INO4	YER043C	SAH1
YOL108C	INO4	YHR083W	SAM35
YOL108C	INO4	YJL168C	SET2
YOL108C	INO4	YER116C	SLX8
YOL108C	INO4	YDR073W	SNF11
YOL108C	INO4	YMR322C	SNO4
YOL108C	INO4	YJR104C	SOD1
YOL108C	INO4	YHR041C	SRB2
YOL108C	INO4	YBL106C	SRO77
YOL108C	INO4	YJR045C	SSC1
YOL108C	INO4	YOR212W	STE4
YOL108C	INO4	YGL184C	STR3
YOL108C	INO4	YDR297W	SUR2
YOL108C	INO4	YPR009W	SUT2
YOL108C	INO4	YJL048C	UBX6
YOL108C	INO4	YLR168C	UPS2
YOL108C	INO4	YLR132C	USB1
YOL108C	INO4	YEL040W	UTR2
YOL108C	INO4	YNL246W	VPS75
YOL108C	INO4	YOR230W	WTM1
YOL108C	INO4	YJR133W	XPT1
YOL108C	INO4	YBR085C-A	YBR085C-A
YOL108C	INO4	YDR124W	YDR124W
YOL108C	INO4	YEL073C	YEL073C
YOL108C	INO4	YER034W	YER034W
YOL108C	INO4	YGR067C	YGR067C
YOL108C	INO4	YHL026C	YHL026C
YOL108C	INO4	YHR033W	YHR033W
YOL108C	INO4	YNL044W	YIP3
YOL108C	INO4	YKL102C	YKL102C
YOL108C	INO4	YLL058W	YLL058W
YOL108C	INO4	YLR108C	YLR108C
YOL108C	INO4	YLR312C	YLR312C
YOL108C	INO4	YLR352W	YLR352W
YOL108C	INO4	YML053C	YML053C
YOL108C	INO4	YMR317W	YMR317W
YOL108C	INO4	YNR014W	YNR014W
YOL108C	INO4	YOL107W	YOL107W
YOL108C	INO4	YOR289W	YOR289W
YOL108C	INO4	YOR378W	YOR378W
YOL108C	INO4	YFR003C	YPI1
YOR028C	CIN5	YER073W	ALD5
YOR028C	CIN5	YPL061W	ALD6
YOR028C	CIN5	YDR441C	APT2
YOR028C	CIN5	YLL052C	AQY2
YOR028C	CIN5	YJR148W	BAT2
YOR028C	CIN5	YGR230W	BNS1
YOR028C	CIN5	YDL037C	BSC1
YOR028C	CIN5	YGR134W	CAF130
YOR028C	CIN5	YKR066C	CCP1
YOR028C	CIN5	YMR038C	CCS1
YOR028C	CIN5	YGR108W	CLB1
YOR028C	CIN5	YPR013C	CMR3
YOR028C	CIN5	YOR303W	CPA1
YOR028C	CIN5	YOL052C-A	DDR2
YOR028C	CIN5	YMR173W	DDR48
YOR028C	CIN5	YKR071C	DRE2
YOR028C	CIN5	YBR208C	DUR1,2
YOR028C	CIN5	YBL043W	ECM13
YOR028C	CIN5	YLR228C	ECM22
YOR028C	CIN5	YML126C	ERG13
YOR028C	CIN5	YOR317W	FAA1
YOR028C	CIN5	YMR319C	FET4
YOR028C	CIN5	YOR381W	FRE3
YOR028C	CIN5	YHR049W	FSH1
YOR028C	CIN5	YOR178C	GAC1
YOR028C	CIN5	YLR081W	GAL2
YOR028C	CIN5	YMR136W	GAT2
YOR028C	CIN5	YMR135C	GID8
YOR028C	CIN5	YEL011W	GLC3
YOR028C	CIN5	YHR183W	GND1
YOR028C	CIN5	YDR508C	GNP1
YOR028C	CIN5	YOR032C	HMS1
YOR028C	CIN5	YJR147W	HMS2
YOR028C	CIN5	YOL155C	HPF1
YOR028C	CIN5	YDR533C	HSP31
YOR028C	CIN5	YGL253W	HXK2
YOR028C	CIN5	YMR011W	HXT2
YOR028C	CIN5	YDR343C	HXT6
YOR028C	CIN5	YEL044W	IES6
YOR028C	CIN5	YPL135W	ISU1
YOR028C	CIN5	YGR238C	KEL2
YOR028C	CIN5	YOR306C	MCH5
YOR028C	CIN5	YGR121C	MEP1
YOR028C	CIN5	YGR249W	MGA1
YOR028C	CIN5	YKL171W	NNK1
YOR028C	CIN5	YGR233C	PHO81
YOR028C	CIN5	YIL045W	PIG2
YOR028C	CIN5	YDR300C	PRO1
YOR028C	CIN5	YNL180C	RHO5
YOR028C	CIN5	YGR180C	RNR4
YOR028C	CIN5	YOR049C	RSB1
YOR028C	CIN5	YMR266W	RSN1
YOR028C	CIN5	YJL105W	SET4
YOR028C	CIN5	YPL165C	SET6
YOR028C	CIN5	YDL168W	SFA1
YOR028C	CIN5	YOR315W	SFG1
YOR028C	CIN5	YLR034C	SMF3
YOR028C	CIN5	YMR016C	SOK2
YOR028C	CIN5	YER150W	SPI1
YOR028C	CIN5	YKL072W	STB6
YOR028C	CIN5	YNL087W	TCB2
YOR028C	CIN5	YGR192C	TDH3
YOR028C	CIN5	YBR067C	TIP1
YOR028C	CIN5	YFL004W	VTC2
YOR028C	CIN5	YAL037W	YAL037W
YOR028C	CIN5	YDR259C	YAP6
YOR028C	CIN5	YBL029W	YBL029W
YOR028C	CIN5	YBR071W	YBR071W
YOR028C	CIN5	YCR102C	YCR102C
YOR028C	CIN5	YDL129W	YDL129W
YOR028C	CIN5	YDR132C	YDR132C
YOR028C	CIN5	YDR338C	YDR338C
YOR028C	CIN5	YFL051C	YFL051C
YOR028C	CIN5	YGR035C	YGR035C
YOR028C	CIN5	YGR234W	YHB1
YOR028C	CIN5	YHL044W	YHL044W
YOR028C	CIN5	YJR003C	YJR003C
YOR028C	CIN5	YLL053C	YLL053C
YOR028C	CIN5	YLL054C	YLL054C
YOR028C	CIN5	YLR030W	YLR030W
YOR028C	CIN5	YLR346C	YLR346C
YOR028C	CIN5	YLR413W	YLR413W
YOR028C	CIN5	YLR460C	YLR460C
YOR028C	CIN5	YML131W	YML131W
YOR028C	CIN5	YMR265C	YMR265C
YOR028C	CIN5	YNL217W	YNL217W
YOR028C	CIN5	YBR183W	YPC1
YOR028C	CIN5	YPL278C	YPL278C
YOR028C	CIN5	YLR121C	YPS3
YOR028C	CIN5	YOL109W	ZEO1
YOR028C	CIN5	YOL154W	ZPS1
YOR032C	HMS1	YBR135W	CKS1
YOR032C	HMS1	YEL047C	FRD1
YOR032C	HMS1	YGL134W	PCL10
YOR032C	HMS1	YKL043W	PHD1
YOR032C	HMS1	YDR259C	YAP6
YOR140W	SFL1	YGR052W	FMP48
YOR140W	SFL1	YGR249W	MGA1
YOR140W	SFL1	YOR107W	RGS2
YOR140W	SFL1	YNL234W	YNL234W
YOR344C	TYE7	YGL256W	ADH4
YOR344C	TYE7	YBR145W	ADH5
YOR344C	TYE7	YAL038W	CDC19
YOR344C	TYE7	YJL196C	ELO1
YOR344C	TYE7	YHR174W	ENO2
YOR344C	TYE7	YKL060C	FBA1
YOR344C	TYE7	YPL075W	GCR1
YOR344C	TYE7	YKL152C	GPM1
YOR344C	TYE7	YHR046C	INM1
YOR344C	TYE7	YDL079C	MRK1
YOR344C	TYE7	YGL055W	OLE1
YOR344C	TYE7	YBR196C	PGI1
YOR344C	TYE7	YJR009C	TDH2
YOR344C	TYE7	YGR192C	TDH3
YOR344C	TYE7	YDR400W	URH1
YOR344C	TYE7	YNL107W	YAF9
YOR344C	TYE7	YNL108C	YNL108C
YOR358W	HAP5	YLR220W	CCC1
YOR358W	HAP5	YER174C	GRX4
YOR358W	HAP5	YPL207W	TYW1
YOR358W	HAP5	YDR495C	VPS3
YPL038W	MET31	YJR137C	MET5
YPL038W	MET31	YPR168W	NUT2
YPL038W	MET31	YJL212C	OPT1
YPL038W	MET31	YJL210W	PEX2
YPL038W	MET31	YLR180W	SAM1
YPL038W	MET31	YDR522C	SPS2
YPL038W	MET31	YGL184C	STR3
YPL038W	MET31	YDR042C	YDR042C
YPL038W	MET31	YLR179C	YLR179C
YPL075W	GCR1	YER177W	BMH1
YPL075W	GCR1	YAL038W	CDC19
YPL075W	GCR1	YHR174W	ENO2
YPL075W	GCR1	YKL060C	FBA1
YPL075W	GCR1	YKL152C	GPM1
YPL075W	GCR1	YOR193W	PEX27
YPL075W	GCR1	YJR009C	TDH2
YPL075W	GCR1	YGR192C	TDH3
YPL075W	GCR1	YDR050C	TPI1
YPL089C	RLM1	YKL096W	CWP1
YPL089C	RLM1	YDR420W	HKR1
YPL089C	RLM1	YKL161C	KDX1
YPL089C	RLM1	YKL163W	PIR3
YPL089C	RLM1	YIL122W	POG1
YPL089C	RLM1	YHL034C	SBP1
YPL089C	RLM1	YKR091W	SRL3
YPL177C	CUP9	YJR148W	BAT2
YPL177C	CUP9	YLR408C	BLS1
YPL177C	CUP9	YPR013C	CMR3
YPL177C	CUP9	YPL177C	CUP9
YPL177C	CUP9	YLR056W	ERG3
YPL177C	CUP9	YDR070C	FMP16
YPL177C	CUP9	YOR178C	GAC1
YPL177C	CUP9	YOR032C	HMS1
YPL177C	CUP9	YDR343C	HXT6
YPL177C	CUP9	YOR136W	IDH2
YPL177C	CUP9	YGR249W	MGA1
YPL177C	CUP9	YML123C	PHO84
YPL177C	CUP9	YDL214C	PRR2
YPL177C	CUP9	YKR093W	PTR2
YPL177C	CUP9	YPL123C	RNY1
YPL177C	CUP9	YOR049C	RSB1
YPL177C	CUP9	YFR005C	SAD1
YPL177C	CUP9	YOR315W	SFG1
YPL177C	CUP9	YKR092C	SRP40
YPL177C	CUP9	YDL129W	YDL129W
YPL177C	CUP9	YFR006W	YFR006W
YPL248C	GAL4	YBR020W	GAL1
YPL248C	GAL4	YLR081W	GAL2
YPL248C	GAL4	YDR009W	GAL3
YPL248C	GAL4	YBR018C	GAL7
YPR104C	FHL1	YDR448W	ADA2
YPR104C	FHL1	YJL178C	ATG27
YPR104C	FHL1	YHR021W-A	ECM12
YPR104C	FHL1	YOR183W	FYV12
YPR104C	FHL1	YIL149C	MLP2
YPR104C	FHL1	YPR131C	NAT3
YPR104C	FHL1	YBR188C	NTC20
YPR104C	FHL1	YOR161C	PNS1
YPR104C	FHL1	YPR103W	PRE2
YPR104C	FHL1	YLR387C	REH1
YPR104C	FHL1	YBL093C	ROX3
YPR104C	FHL1	YLR075W	RPL10
YPR104C	FHL1	RPL11a	RPL11a
YPR104C	FHL1	RPL11b	RPL11b
YPR104C	FHL1	RPL14b	RPL14b
YPR104C	FHL1	RPL19a	RPL19a
YPR104C	FHL1	RPL21b	RPL21b
YPR104C	FHL1	RPL26a	RPL26a
YPR104C	FHL1	RPL33b	RPL33b
YPR104C	FHL1	RPL36a	RPL36a
YPR104C	FHL1	YLR325C	RPL38
YPR104C	FHL1	RPL42b	RPL42b
YPR104C	FHL1	RPL43a	RPL43a
YPR104C	FHL1	RPL43b	RPL43b
YPR104C	FHL1	RPL9a	RPL9a
YPR104C	FHL1	RPP1a	RPP1a
YPR104C	FHL1	RPP2a	RPP2a
YPR104C	FHL1	RPS0b	RPS0b
YPR104C	FHL1	YOR369C	RPS12
YPR104C	FHL1	RPS14b	RPS14b
YPR104C	FHL1	RPS18b	RPS18b
YPR104C	FHL1	RPS19a	RPS19a
YPR104C	FHL1	YGL123W	RPS2
YPR104C	FHL1	YHL015W	RPS20
YPR104C	FHL1	RPS22a	RPS22a
YPR104C	FHL1	RPS23a	RPS23a
YPR104C	FHL1	RPS24b	RPS24b
YPR104C	FHL1	RPS25a	RPS25a
YPR104C	FHL1	RPS25b	RPS25b
YPR104C	FHL1	RPS28a	RPS28a
YPR104C	FHL1	YNL178W	RPS3
YPR104C	FHL1	RPS30a	RPS30a
YPR104C	FHL1	RPS30b	RPS30b
YPR104C	FHL1	YLR167W	RPS31
YPR104C	FHL1	RPS9b	RPS9b
YPR104C	FHL1	YDL076C	RXT3
YPR104C	FHL1	YJL192C	SOP4
YPR104C	FHL1	YCL037C	SRO9
YPR104C	FHL1	YML064C	TEM1
YPR104C	FHL1	YDL060W	TSR1
YPR104C	FHL1	YBR184W	YBR184W
YPR104C	FHL1	YFL034W	YFL034W
YPR104C	FHL1	YGR117C	YGR117C
YPR104C	FHL1	YML025C	YML6
YPR104C	FHL1	YOR292C	YOR292C
YPR199C	ARR1	YCR040W	MATALPHA1
YPR199C	ARR1	YAL018C	YAL018C
YPR199C	ARR1	YMR087W	YMR087W
