# Supplementary material for: Dual threshold optimization and network inference reveal convergent evidence from TF binding locations and TF perturbation responses
Source: Genome Res. 2020 Mar;30(3):459–71. doi: 10.1101/gr.259655.119 (PMC7111528; doi:10.1101/gr.259655.119)
Supplement: Supplemental Material [file supp_gr.259655.119_Supplemental_File_S5.xlsx]

## Sheet: README
Supplemental File S5: Network edges from acceptable TFs to their bound and responsive genes after dual threshold optimization on calling cards and Kemmeren TFKO response data.
Column	Description
TF_systematicName	Transcription factor in systematic name
TF_commonName	Transcription factor in common name
Gene_systematicName	Target gene in systematic name
Gene_commonName	Traget gene in common name

## Sheet: Supplemental_File_S5
TF_systematicName	TF_commonName	Gene_systematicName	Gene_commonName
YDR034C	LYS14	YJL200C	ACO2
YDR034C	LYS14	YIR034C	LYS1
YDR034C	LYS14	YIL094C	LYS12
YDR034C	LYS14	YDR034C	LYS14
YDR034C	LYS14	YDL182W	LYS20
YDR034C	LYS14	YDR234W	LYS4
YDR034C	LYS14	YNR050C	LYS9
YDR034C	LYS14	YDL183C	YDL183C
YEL009C	GCN4	YBR145W	ADH5
YEL009C	GCN4	YER073W	ALD5
YEL009C	GCN4	YOL058W	ARG1
YEL009C	GCN4	YHR018C	ARG4
YEL009C	GCN4	YMR062C	ARG7
YEL009C	GCN4	YOL140W	ARG8
YEL009C	GCN4	YDR127W	ARO1
YEL009C	GCN4	YDR035W	ARO3
YEL009C	GCN4	YPR145W	ASN1
YEL009C	GCN4	YJR025C	BNA1
YEL009C	GCN4	YPL111W	CAR1
YEL009C	GCN4	YJR109C	CPA2
YEL009C	GCN4	YDL198C	GGC1
YEL009C	GCN4	YCL030C	HIS4
YEL009C	GCN4	YER052C	HOM3
YEL009C	GCN4	YMR195W	ICY1
YEL009C	GCN4	YPL250C	ICY2
YEL009C	GCN4	YNL104C	LEU4
YEL009C	GCN4	YIR034C	LYS1
YEL009C	GCN4	YGR161C	RTS3
YEL009C	GCN4	YMR095C	SNO1
YEL009C	GCN4	YMR096W	SNZ1
YEL009C	GCN4	YER175C	TMT1
YJR060W	CBF1	YHR137W	ARO9
YJR060W	CBF1	YKL016C	ATP7
YJR060W	CBF1	YJL060W	BNA3
YJR060W	CBF1	YLR267W	BOP2
YJR060W	CBF1	YJR060W	CBF1
YJR060W	CBF1	YDR141C	DOP1
YJR060W	CBF1	YAL026C	DRS2
YJR060W	CBF1	YGR200C	ELP2
YJR060W	CBF1	YJL167W	ERG20
YJR060W	CBF1	YHR089C	GAR1
YJR060W	CBF1	YGR032W	GSC2
YJR060W	CBF1	YJL101C	GSH1
YJR060W	CBF1	YGR154C	GTO1
YJR060W	CBF1	YIL116W	HIS5
YJR060W	CBF1	YER052C	HOM3
YJR060W	CBF1	YPL250C	ICY2
YJR060W	CBF1	YNL037C	IDH1
YJR060W	CBF1	YDL066W	IDP1
YJR060W	CBF1	YJR138W	IML1
YJR060W	CBF1	YNL104C	LEU4
YJR060W	CBF1	YNL277W	MET2
YJR060W	CBF1	YOL064C	MET22
YJR060W	CBF1	YIR017C	MET28
YJR060W	CBF1	YJR010W	MET3
YJR060W	CBF1	YKL201C	MNN4
YJR060W	CBF1	YCR092C	MSH3
YJR060W	CBF1	YJL116C	NCA3
YJR060W	CBF1	YNL175C	NOP13
YJR060W	CBF1	YNL015W	PBI2
YJR060W	CBF1	YER053C	PIC2
YJR060W	CBF1	YIL117C	PRM5
YJR060W	CBF1	YER099C	PRS2
YJR060W	CBF1	YHR001W-A	QCR10
YJR060W	CBF1	YFL033C	RIM15
YJR060W	CBF1	YIL127C	RRT14
YJR060W	CBF1	YPL235W	RVB2
YJR060W	CBF1	YGR049W	SCM4
YJR060W	CBF1	YDR023W	SES1
YJR060W	CBF1	YJL168C	SET2
YJR060W	CBF1	YMR095C	SNO1
YJR060W	CBF1	YMR096W	SNZ1
YJR060W	CBF1	YJR130C	STR2
YJR060W	CBF1	YGL184C	STR3
YJR060W	CBF1	YHR099W	TRA1
YJR060W	CBF1	YKL014C	URB1
YJR060W	CBF1	YJL109C	UTP10
YJR060W	CBF1	YBR255C-A	YBR255C-A
YJR060W	CBF1	YCL042W	YCL042W
YJR060W	CBF1	YCR087C-A	YCR087C-A
YJR060W	CBF1	YLL055W	YCT1
YJR060W	CBF1	YDR115W	YDR115W
YJR060W	CBF1	YFR049W	YMR31
YJR060W	CBF1	YER074W-A	YOS1
YKL038W	RGT1	YGL157W	ARI1
YKL038W	RGT1	YMR136W	GAT2
YKL038W	RGT1	YDR358W	GGA1
YKL038W	RGT1	YHR094C	HXT1
YKL038W	RGT1	YOL156W	HXT11
YKL038W	RGT1	YMR011W	HXT2
YKL038W	RGT1	YHR096C	HXT5
YKL038W	RGT1	YJL219W	HXT9
YKL038W	RGT1	YER028C	MIG3
YKL038W	RGT1	YGR050C	YGR050C
YKL038W	RGT1	YOR062C	YOR062C
YLR403W	SFP1	YBR085W	AAC3
YLR403W	SFP1	YEL071W	DLD3
YLR403W	SFP1	YLR432W	IMD3
YLR403W	SFP1	YOR108W	LEU9
YLR403W	SFP1	YJR070C	LIA1
YLR403W	SFP1	YOR370C	MRS6
YLR403W	SFP1	YMR145C	NDE1
YLR403W	SFP1	YBR025C	OLA1
YLR403W	SFP1	YLR073C	RFU1
YLR403W	SFP1	YOR095C	RKI1
YLR403W	SFP1	RPL4a	RPL4a
YLR403W	SFP1	YJL080C	SCP160
YLR403W	SFP1	YPR069C	SPE3
YLR403W	SFP1	YPL245W	YPL245W
YLR451W	LEU3	YER073W	ALD5
YLR451W	LEU3	YBR068C	BAP2
YLR451W	LEU3	YHR208W	BAT1
YLR451W	LEU3	YLR348C	DIC1
YLR451W	LEU3	YKR071C	DRE2
YLR451W	LEU3	YMR136W	GAT2
YLR451W	LEU3	YJR016C	ILV3
YLR451W	LEU3	YOR226C	ISU2
YLR451W	LEU3	YGL009C	LEU1
YLR451W	LEU3	YNL104C	LEU4
YLR451W	LEU3	YOR108W	LEU9
YLR451W	LEU3	YKL120W	OAC1
YLR451W	LEU3	YHR063C	PAN5
YLR451W	LEU3	YPR002W	PDH1
YLR451W	LEU3	YNL231C	PDR16
YLR451W	LEU3	YGL062W	PYC1
YLR451W	LEU3	YJR045C	SSC1
YLR451W	LEU3	YBR069C	TAT1
YLR451W	LEU3	YMR291W	TDA1
YLR451W	LEU3	YBL029C-A	YBL029C-A
YLR451W	LEU3	YBL029W	YBL029W
YLR451W	LEU3	YNL241C	ZWF1
YMR182C	RGM1	YMR244C-A	COA6
YMR182C	RGM1	YDR516C	EMI2
YMR182C	RGM1	YOR317W	FAA1
YMR182C	RGM1	YLR258W	GSY2
YMR182C	RGM1	YEL069C	HXT13
YMR182C	RGM1	YOR298C-A	MBF1
YMR182C	RGM1	YEL007W	MIT1
YMR182C	RGM1	YDR001C	NTH1
YMR182C	RGM1	YPL058C	PDR12
YMR182C	RGM1	YDR406W	PDR15
YMR182C	RGM1	YMR105C	PGM2
YMR182C	RGM1	YNR013C	PHO91
YMR182C	RGM1	YIL117C	PRM5
YMR182C	RGM1	YLR176C	RFX1
YMR182C	RGM1	YER067W	RGI1
YMR182C	RGM1	YIL119C	RPI1
YMR182C	RGM1	YBR214W	SDS24
YMR182C	RGM1	YOR273C	TPO4
YMR182C	RGM1	YBR126C	TPS1
YMR182C	RGM1	YKL035W	UGP1
YMR182C	RGM1	YLR177W	YLR177W
YMR182C	RGM1	YOL014W	YOL014W
YMR182C	RGM1	YPR063C	YPR063C
YNL199C	GCR2	YNL220W	ADE12
YNL199C	GCR2	YGL256W	ADH4
YNL199C	GCR2	YDR384C	ATO3
YNL199C	GCR2	YPL111W	CAR1
YNL199C	GCR2	YAL038W	CDC19
YNL199C	GCR2	YMR199W	CLN1
YNL199C	GCR2	YLR348C	DIC1
YNL199C	GCR2	YJL196C	ELO1
YNL199C	GCR2	YHR174W	ENO2
YNL199C	GCR2	YPL075W	GCR1
YNL199C	GCR2	YKL152C	GPM1
YNL199C	GCR2	YDL021W	GPM2
YNL199C	GCR2	YDL066W	IDP1
YNL199C	GCR2	YLR432W	IMD3
YNL199C	GCR2	YHR015W	MIP6
YNL199C	GCR2	YOL104C	NDJ1
YNL199C	GCR2	YGL062W	PYC1
YNL199C	GCR2	YPL024W	RMI1
YNL199C	GCR2	YDR510W	SMT3
YNL199C	GCR2	YMR291W	TDA1
YNL199C	GCR2	YBR240C	THI2
YNL199C	GCR2	YDR050C	TPI1
YNL199C	GCR2	YDR379C-A	YDR379C-A
YNL199C	GCR2	YER138W-A	YER138W-A
YNL199C	GCR2	YNL160W	YGP1
YNL199C	GCR2	YGR050C	YGR050C
YNL199C	GCR2	YGR234W	YHB1
YNL199C	GCR2	YNL095C	YNL095C
YOL108C	INO4	YJR105W	ADO1
YOL108C	INO4	YGR157W	CHO2
YOL108C	INO4	YBR177C	EHT1
YOL108C	INO4	YGL077C	HNM1
YOL108C	INO4	YDR497C	ITR1
YOL108C	INO4	YGL125W	MET13
YOL108C	INO4	YJR074W	MOG1
YOL108C	INO4	YHL020C	OPI1
YOL108C	INO4	YJR073C	OPI3
YOL108C	INO4	YDR502C	SAM2
YOL108C	INO4	YPL274W	SAM3
YOL108C	INO4	YDR124W	YDR124W
YOL108C	INO4	YEL073C	YEL073C
