# Supplementary material for: Dual threshold optimization and network inference reveal convergent evidence from TF binding locations and TF perturbation responses
Source: Genome Res. 2020 Mar;30(3):459–71. doi: 10.1101/gr.259655.119 (PMC7111528; doi:10.1101/gr.259655.119)
Supplement: Supplemental Material [file supp_gr.259655.119_Supplemental_File_S6.xlsx]

## Sheet: README
Supplemental File S6: Network edges from acceptable TFs to their bound and responsive genes after dual threshold optimization on calling cards and ZEV15 response data.
Column	Description
TF_systematicName	Transcription factor in systematic name
TF_commonName	Transcription factor in common name
Gene_systematicName	Target gene in systematic name
Gene_commonName	Traget gene in common name

## Sheet: Supplemental_File_S6
TF_systematicName	TF_commonName	Gene_systematicName	Gene_commonName
YDR034C	LYS14	YJL200C	ACO2
YDR034C	LYS14	YBR291C	CTP1
YDR034C	LYS14	YNL268W	LYP1
YDR034C	LYS14	YIR034C	LYS1
YDR034C	LYS14	YIL094C	LYS12
YDR034C	LYS14	YDR034C	LYS14
YDR034C	LYS14	YBR115C	LYS2
YDR034C	LYS14	YDL182W	LYS20
YDR034C	LYS14	YDL131W	LYS21
YDR034C	LYS14	YDR234W	LYS4
YDR034C	LYS14	YNR050C	LYS9
YDR034C	LYS14	YIL164C	NIT1
YDR034C	LYS14	YBR147W	RTC2
YDR034C	LYS14	YDL183C	YDL183C
YDR034C	LYS14	YGR125W	YGR125W
YEL009C	GCN4	YBR145W	ADH5
YEL009C	GCN4	YER073W	ALD5
YEL009C	GCN4	YOL058W	ARG1
YEL009C	GCN4	YJL071W	ARG2
YEL009C	GCN4	YJL088W	ARG3
YEL009C	GCN4	YHR018C	ARG4
YEL009C	GCN4	YER069W	ARG5,6
YEL009C	GCN4	YMR062C	ARG7
YEL009C	GCN4	YOL140W	ARG8
YEL009C	GCN4	YDR127W	ARO1
YEL009C	GCN4	YDR035W	ARO3
YEL009C	GCN4	YBR249C	ARO4
YEL009C	GCN4	YPR145W	ASN1
YEL009C	GCN4	YBR068C	BAP2
YEL009C	GCN4	YHR208W	BAT1
YEL009C	GCN4	YJR025C	BNA1
YEL009C	GCN4	YNR069C	BSC5
YEL009C	GCN4	YFL028C	CAF16
YEL009C	GCN4	YEL063C	CAN1
YEL009C	GCN4	YJR109C	CPA2
YEL009C	GCN4	YDL198C	GGC1
YEL009C	GCN4	YGR154C	GTO1
YEL009C	GCN4	YER055C	HIS1
YEL009C	GCN4	YOR202W	HIS3
YEL009C	GCN4	YCL030C	HIS4
YEL009C	GCN4	YIL116W	HIS5
YEL009C	GCN4	YBR248C	HIS7
YEL009C	GCN4	YER052C	HOM3
YEL009C	GCN4	YMR195W	ICY1
YEL009C	GCN4	YPL250C	ICY2
YEL009C	GCN4	YLR355C	ILV5
YEL009C	GCN4	YFR055W	IRC7
YEL009C	GCN4	YNL104C	LEU4
YEL009C	GCN4	YOR108W	LEU9
YEL009C	GCN4	YIR034C	LYS1
YEL009C	GCN4	YBR115C	LYS2
YEL009C	GCN4	YDL182W	LYS20
YEL009C	GCN4	YKL029C	MAE1
YEL009C	GCN4	YOL119C	MCH4
YEL009C	GCN4	YGL125W	MET13
YEL009C	GCN4	YNL103W	MET4
YEL009C	GCN4	YHR162W	MPC2
YEL009C	GCN4	YIL164C	NIT1
YEL009C	GCN4	YOR222W	ODC2
YEL009C	GCN4	YOR130C	ORT1
YEL009C	GCN4	YNL221C	POP1
YEL009C	GCN4	YJL072C	PSF2
YEL009C	GCN4	YBR218C	PYC2
YEL009C	GCN4	YDR487C	RIB3
YEL009C	GCN4	YMR063W	RIM9
YEL009C	GCN4	YBR147W	RTC2
YEL009C	GCN4	YGR161C	RTS3
YEL009C	GCN4	YMR095C	SNO1
YEL009C	GCN4	YMR096W	SNZ1
YEL009C	GCN4	YPL092W	SSU1
YEL009C	GCN4	YJR130C	STR2
YEL009C	GCN4	YGL184C	STR3
YEL009C	GCN4	YBR294W	SUL1
YEL009C	GCN4	YOR337W	TEA1
YEL009C	GCN4	YER175C	TMT1
YEL009C	GCN4	YKL211C	TRP3
YEL009C	GCN4	YDR354W	TRP4
YEL009C	GCN4	YGL026C	TRP5
YEL009C	GCN4	YDL170W	UGA3
YEL009C	GCN4	YJR111C	YJR111C
YEL009C	GCN4	YLR152C	YLR152C
YEL009C	GCN4	YBR104W	YMC2
YEL009C	GCN4	YOR302W	YOR302W
YJL056C	ZAP1	YJL056C	ZAP1
YJL056C	ZAP1	YOL154W	ZPS1
YJL056C	ZAP1	YGL255W	ZRT1
YJL056C	ZAP1	YLR130C	ZRT2
YJR060W	CBF1	YCR088W	ABP1
YJR060W	CBF1	YNL220W	ADE12
YJR060W	CBF1	YBR145W	ADH5
YJR060W	CBF1	YDR022C	ATG31
YJR060W	CBF1	YMR301C	ATM1
YJR060W	CBF1	YKL016C	ATP7
YJR060W	CBF1	YIL088C	AVT7
YJR060W	CBF1	YGR286C	BIO2
YJR060W	CBF1	YJL060W	BNA3
YJR060W	CBF1	YDR531W	CAB1
YJR060W	CBF1	YJR060W	CBF1
YJR060W	CBF1	YDR254W	CHL4
YJR060W	CBF1	YPR030W	CSR2
YJR060W	CBF1	YAL012W	CYS3
YJR060W	CBF1	YGR155W	CYS4
YJR060W	CBF1	YJR150C	DAN1
YJR060W	CBF1	YEL071W	DLD3
YJR060W	CBF1	YLL008W	DRS1
YJR060W	CBF1	YAL026C	DRS2
YJR060W	CBF1	YER124C	DSE1
YJR060W	CBF1	YGR254W	ENO1
YJR060W	CBF1	YJL167W	ERG20
YJR060W	CBF1	YHR176W	FMO1
YJR060W	CBF1	YCR098C	GIT1
YJR060W	CBF1	YCL040W	GLK1
YJR060W	CBF1	YDR508C	GNP1
YJR060W	CBF1	YKL026C	GPX1
YJR060W	CBF1	YCL035C	GRX1
YJR060W	CBF1	YFR015C	GSY1
YJR060W	CBF1	YGR154C	GTO1
YJR060W	CBF1	YOR038C	HIR2
YJR060W	CBF1	YER052C	HOM3
YJR060W	CBF1	YJR139C	HOM6
YJR060W	CBF1	HOR2	HOR2
YJR060W	CBF1	YPL250C	ICY2
YJR060W	CBF1	YNL037C	IDH1
YJR060W	CBF1	YDL066W	IDP1
YJR060W	CBF1	YJR138W	IML1
YJR060W	CBF1	YDR503C	LPP1
YJR060W	CBF1	YCL034W	LSB5
YJR060W	CBF1	YKR069W	MET1
YJR060W	CBF1	YFR030W	MET10
YJR060W	CBF1	YKL001C	MET14
YJR060W	CBF1	YPR167C	MET16
YJR060W	CBF1	YLR303W	MET17
YJR060W	CBF1	YNL277W	MET2
YJR060W	CBF1	YOL064C	MET22
YJR060W	CBF1	YJR010W	MET3
YJR060W	CBF1	YDR253C	MET32
YJR060W	CBF1	YNL103W	MET4
YJR060W	CBF1	YJR137C	MET5
YJR060W	CBF1	YBR213W	MET8
YJR060W	CBF1	YER001W	MNN1
YJR060W	CBF1	YKL201C	MNN4
YJR060W	CBF1	YHL004W	MRP4
YJR060W	CBF1	YJL133W	MRS3
YJR060W	CBF1	YCR092C	MSH3
YJR060W	CBF1	YNL063W	MTQ1
YJR060W	CBF1	YJL116C	NCA3
YJR060W	CBF1	YNL036W	NCE103
YJR060W	CBF1	YHR042W	NCP1
YJR060W	CBF1	YML120C	NDI1
YJR060W	CBF1	NHP6b	NHP6b
YJR060W	CBF1	YOR098C	NUP1
YJR060W	CBF1	YPR168W	NUT2
YJR060W	CBF1	YGL055W	OLE1
YJR060W	CBF1	YER058W	PET117
YJR060W	CBF1	YDR281C	PHM6
YJR060W	CBF1	YOL011W	PLB3
YJR060W	CBF1	YNL282W	POP3
YJR060W	CBF1	YIL117C	PRM5
YJR060W	CBF1	YML017W	PSP2
YJR060W	CBF1	YDL006W	PTC1
YJR060W	CBF1	YKL015W	PUT3
YJR060W	CBF1	YHR001W-A	QCR10
YJR060W	CBF1	YDL059C	RAD59
YJR060W	CBF1	YFL033C	RIM15
YJR060W	CBF1	YEL072W	RMD6
YJR060W	CBF1	YJR113C	RSM7
YJR060W	CBF1	YER125W	RSP5
YJR060W	CBF1	YPL235W	RVB2
YJR060W	CBF1	YGL126W	SCS3
YJR060W	CBF1	YGL056C	SDS23
YJR060W	CBF1	YIL074C	SER33
YJR060W	CBF1	YDR023W	SES1
YJR060W	CBF1	YJR095W	SFC1
YJR060W	CBF1	YMR095C	SNO1
YJR060W	CBF1	YGL127C	SOH1
YJR060W	CBF1	YBR250W	SPO23
YJR060W	CBF1	YIL126W	STH1
YJR060W	CBF1	YGL184C	STR3
YJR060W	CBF1	YLR092W	SUL2
YJR060W	CBF1	YIL047C	SYG1
YJR060W	CBF1	YJR009C	TDH2
YJR060W	CBF1	YLR136C	TIS11
YJR060W	CBF1	YHR099W	TRA1
YJR060W	CBF1	YDL112W	TRM3
YJR060W	CBF1	YOR054C	VHS3
YJR060W	CBF1	YAL018C	YAL018C
YJR060W	CBF1	YBR255C-A	YBR255C-A
YJR060W	CBF1	YCL042W	YCL042W
YJR060W	CBF1	YCR087C-A	YCR087C-A
YJR060W	CBF1	YLL055W	YCT1
YJR060W	CBF1	YDL073W	YDL073W
YJR060W	CBF1	YDR061W	YDR061W
YJR060W	CBF1	YDR115W	YDR115W
YJR060W	CBF1	YDR381C-A	YDR381C-A
YJR060W	CBF1	YIR042C	YIR042C
YJR060W	CBF1	YJL052C-A	YJL052C-A
YJR060W	CBF1	YJR115W	YJR115W
YJR060W	CBF1	YJR120W	YJR120W
YJR060W	CBF1	YKR073C	YKR073C
YJR060W	CBF1	YLR149C	YLR149C
YJR060W	CBF1	YLR283W	YLR283W
YJR060W	CBF1	YML018C	YML018C
YJR060W	CBF1	YML122C	YML122C
YJR060W	CBF1	YMR122C	YMR122C
YJR060W	CBF1	YFR049W	YMR31
YJR060W	CBF1	YOR064C	YNG1
YJR060W	CBF1	YNL034W	YNL034W
YJR060W	CBF1	YNL095C	YNL095C
YJR060W	CBF1	YNR014W	YNR014W
YJR060W	CBF1	YER074W-A	YOS1
YKL038W	RGT1	YHR094C	HXT1
YKL038W	RGT1	YMR011W	HXT2
YKL038W	RGT1	YDR345C	HXT3
YKL038W	RGT1	YHR092C	HXT4
YKL038W	RGT1	YGL209W	MIG2
YKL038W	RGT1	YER028C	MIG3
YKL038W	RGT1	YDR277C	MTH1
YKL038W	RGT1	YOR047C	STD1
YKL038W	RGT1	YDR344C	YDR344C
YKL038W	RGT1	YGL034C	YGL034C
YKL038W	RGT1	YKR075C	YKR075C
YKL038W	RGT1	YLR108C	YLR108C
YKL038W	RGT1	YOR062C	YOR062C
YLR403W	SFP1	YGR068C	ART5
YLR403W	SFP1	YHR032W	ERC1
YLR403W	SFP1	YOR178C	GAC1
YLR403W	SFP1	YNL255C	GIS2
YLR403W	SFP1	YMR108W	ILV2
YLR403W	SFP1	YLR432W	IMD3
YLR403W	SFP1	YOR108W	LEU9
YLR403W	SFP1	YJR070C	LIA1
YLR403W	SFP1	YPR070W	MED1
YLR403W	SFP1	YOR370C	MRS6
YLR403W	SFP1	YBR025C	OLA1
YLR403W	SFP1	YPL246C	RBD2
YLR403W	SFP1	YLR073C	RFU1
YLR403W	SFP1	YMR182C	RGM1
YLR403W	SFP1	YHL024W	RIM4
YLR403W	SFP1	YOR119C	RIO1
YLR403W	SFP1	YOR095C	RKI1
YLR403W	SFP1	RPL4a	RPL4a
YLR403W	SFP1	YEL026W	SNU13
YLR403W	SFP1	YPR069C	SPE3
YLR403W	SFP1	SUR4	SUR4
YLR403W	SFP1	YKL027W	TCD2
YLR403W	SFP1	YOR337W	TEA1
YLR403W	SFP1	YGR162W	TIF4631
YLR403W	SFP1	YKL056C	TMA19
YLR403W	SFP1	YDR119W	VBA4
YLR403W	SFP1	YLR149C	YLR149C
YLR403W	SFP1	YOR342C	YOR342C
YLR403W	SFP1	YPL245W	YPL245W
YLR403W	SFP1	YLR130C	ZRT2
YLR451W	LEU3	YER073W	ALD5
YLR451W	LEU3	YBR068C	BAP2
YLR451W	LEU3	YHR208W	BAT1
YLR451W	LEU3	YLR348C	DIC1
YLR451W	LEU3	YOR271C	FSF1
YLR451W	LEU3	YLR355C	ILV5
YLR451W	LEU3	YOR226C	ISU2
YLR451W	LEU3	YGL009C	LEU1
YLR451W	LEU3	YKL029C	MAE1
YLR451W	LEU3	YKL120W	OAC1
YLR451W	LEU3	YIL050W	PCL7
YLR451W	LEU3	YBR083W	TEC1
YLR451W	LEU3	YBL029W	YBL029W
YLR451W	LEU3	YKR075C	YKR075C
YMR182C	RGM1	YOR134W	BAG7
YMR182C	RGM1	YDR516C	EMI2
YMR182C	RGM1	YOR317W	FAA1
YMR182C	RGM1	YPR160W	GPH1
YMR182C	RGM1	YFR015C	GSY1
YMR182C	RGM1	YFR053C	HXK1
YMR182C	RGM1	YEL069C	HXT13
YMR182C	RGM1	YDR343C	HXT6
YMR182C	RGM1	YDR342C	HXT7
YMR182C	RGM1	YEL007W	MIT1
YMR182C	RGM1	YKL062W	MSN4
YMR182C	RGM1	YMR105C	PGM2
YMR182C	RGM1	YER053C	PIC2
YMR182C	RGM1	YOR107W	RGS2
YMR182C	RGM1	YIL119C	RPI1
YMR182C	RGM1	YJR159W	SOR1
YMR182C	RGM1	YDL246C	SOR2
YMR182C	RGM1	YGL096W	TOS8
YMR182C	RGM1	YBL029W	YBL029W
YMR182C	RGM1	YBR032W	YBR032W
YMR182C	RGM1	YDR344C	YDR344C
YMR182C	RGM1	YFL051C	YFL051C
YMR182C	RGM1	YFL052W	YFL052W
YMR182C	RGM1	YLR177W	YLR177W
YMR182C	RGM1	YMR181C	YMR181C
YMR182C	RGM1	YNR073C	YNR073C
YMR182C	RGM1	YPR064W	YPR064W
YNL199C	GCR2	YOL086C	ADH1
YNL199C	GCR2	YER177W	BMH1
YNL199C	GCR2	YAL038W	CDC19
YNL199C	GCR2	YGR254W	ENO1
YNL199C	GCR2	YHR174W	ENO2
YNL199C	GCR2	YKL060C	FBA1
YNL199C	GCR2	YFL022C	FRS2
YNL199C	GCR2	YPL075W	GCR1
YNL199C	GCR2	YOL059W	GPD2
YNL199C	GCR2	YPR160W	GPH1
YNL199C	GCR2	YKL152C	GPM1
YNL199C	GCR2	YJR010W	MET3
YNL199C	GCR2	YOL104C	NDJ1
YNL199C	GCR2	YLR044C	PDC1
YNL199C	GCR2	YGR240C	PFK1
YNL199C	GCR2	YMR205C	PFK2
YNL199C	GCR2	YBR196C	PGI1
YNL199C	GCR2	YCR012W	PGK1
YNL199C	GCR2	YJR009C	TDH2
YNL199C	GCR2	YDR050C	TPI1
YNL199C	GCR2	YGR039W	YGR039W
YOL108C	INO4	YLR109W	AHP1
YOL108C	INO4	YGR157W	CHO2
YOL108C	INO4	YLR133W	CKI1
YOL108C	INO4	YLR380W	CSR1
YOL108C	INO4	YBR177C	EHT1
YOL108C	INO4	YJL101C	GSH1
YOL108C	INO4	YGL077C	HNM1
YOL108C	INO4	YJL153C	INO1
YOL108C	INO4	YDR497C	ITR1
YOL108C	INO4	YJR074W	MOG1
YOL108C	INO4	YJR073C	OPI3
YOL108C	INO4	YDR502C	SAM2
YOL108C	INO4	YIL047C	SYG1
YOL108C	INO4	YLR132C	USB1
YOL108C	INO4	YEL073C	YEL073C
YOL108C	INO4	YLR108C	YLR108C
YOR344C	TYE7	YOL086C	ADH1
YOR344C	TYE7	YAL038W	CDC19
YOR344C	TYE7	YGR254W	ENO1
YOR344C	TYE7	YHR174W	ENO2
YOR344C	TYE7	YKL060C	FBA1
YOR344C	TYE7	YPL075W	GCR1
YOR344C	TYE7	YOL059W	GPD2
YOR344C	TYE7	YKL152C	GPM1
YOR344C	TYE7	YLR044C	PDC1
YOR344C	TYE7	YGR240C	PFK1
YOR344C	TYE7	YMR205C	PFK2
YOR344C	TYE7	YJR009C	TDH2
YOR344C	TYE7	YGR192C	TDH3
YOR344C	TYE7	YMR206W	YMR206W
