# Supplementary material for: Dual threshold optimization and network inference reveal convergent evidence from TF binding locations and TF perturbation responses
Source: Genome Res. 2020 Mar;30(3):459–71. doi: 10.1101/gr.259655.119 (PMC7111528; doi:10.1101/gr.259655.119)
Supplement: Supplemental Material [file supp_gr.259655.119_Supplemental_File_S7.xlsx]

## Sheet: README
Supplemental File S7: Network edges from acceptable TFs to their bound and responsive genes after dual threshold optimization on calling cards and output from NetProphet 2.0 run all Kemmeren TFKO response data.
Column	Description
TF_systematicName	Transcription factor in systematic name
TF_commonName	Transcription factor in common name
Gene_systematicName	Target gene in systematic name
Gene_commonName	Traget gene in common name

## Sheet: Supplemental_File_S7
TF_systematicName	TF_commonName	Gene_systematicName	Gene_commonName
YBR033W	EDS1	YGL157W	ARI1
YBR033W	EDS1	YMR011W	HXT2
YBR033W	EDS1	YER028C	MIG3
YBR033W	EDS1	YJL212C	OPT1
YBR033W	EDS1	YMR291W	TDA1
YBR033W	EDS1	YKR075C	YKR075C
YDR034C	LYS14	YJL200C	ACO2
YDR034C	LYS14	YBR291C	CTP1
YDR034C	LYS14	YIR034C	LYS1
YDR034C	LYS14	YIL094C	LYS12
YDR034C	LYS14	YDR034C	LYS14
YDR034C	LYS14	YDL182W	LYS20
YDR034C	LYS14	YDL131W	LYS21
YDR034C	LYS14	YDR234W	LYS4
YDR034C	LYS14	YNR050C	LYS9
YDR034C	LYS14	YIL164C	NIT1
YDR034C	LYS14	YLR142W	PUT1
YEL009C	GCN4	YBR145W	ADH5
YEL009C	GCN4	YER073W	ALD5
YEL009C	GCN4	YDR242W	AMD2
YEL009C	GCN4	YOL058W	ARG1
YEL009C	GCN4	YHR018C	ARG4
YEL009C	GCN4	YMR062C	ARG7
YEL009C	GCN4	YOL140W	ARG8
YEL009C	GCN4	YDR127W	ARO1
YEL009C	GCN4	YDR035W	ARO3
YEL009C	GCN4	YBR249C	ARO4
YEL009C	GCN4	YPR145W	ASN1
YEL009C	GCN4	YBR068C	BAP2
YEL009C	GCN4	YJR025C	BNA1
YEL009C	GCN4	YEL063C	CAN1
YEL009C	GCN4	YPL111W	CAR1
YEL009C	GCN4	YJR109C	CPA2
YEL009C	GCN4	YEL071W	DLD3
YEL009C	GCN4	YHL016C	DUR3
YEL009C	GCN4	YKR039W	GAP1
YEL009C	GCN4	YDL198C	GGC1
YEL009C	GCN4	YCL030C	HIS4
YEL009C	GCN4	YIL116W	HIS5
YEL009C	GCN4	YER052C	HOM3
YEL009C	GCN4	YMR195W	ICY1
YEL009C	GCN4	YPL250C	ICY2
YEL009C	GCN4	YJR016C	ILV3
YEL009C	GCN4	YLR355C	ILV5
YEL009C	GCN4	YPL135W	ISU1
YEL009C	GCN4	YNL104C	LEU4
YEL009C	GCN4	YOR108W	LEU9
YEL009C	GCN4	YIR034C	LYS1
YEL009C	GCN4	YKL029C	MAE1
YEL009C	GCN4	YOL119C	MCH4
YEL009C	GCN4	YOL064C	MET22
YEL009C	GCN4	YHR162W	MPC2
YEL009C	GCN4	YOR130C	ORT1
YEL009C	GCN4	YDR487C	RIB3
YEL009C	GCN4	YBR147W	RTC2
YEL009C	GCN4	YDL025C	RTK1
YEL009C	GCN4	YDR233C	RTN1
YEL009C	GCN4	YGR161C	RTS3
YEL009C	GCN4	YMR095C	SNO1
YEL009C	GCN4	YMR096W	SNZ1
YEL009C	GCN4	YJR130C	STR2
YEL009C	GCN4	YER175C	TMT1
YEL009C	GCN4	YGL026C	TRP5
YEL009C	GCN4	YDL170W	UGA3
YEL009C	GCN4	YOR302W	YOR302W
YJL056C	ZAP1	YGL256W	ADH4
YJL056C	ZAP1	YPL250C	ICY2
YJL056C	ZAP1	YJL055W	YJL055W
YJL056C	ZAP1	YJL056C	ZAP1
YJL056C	ZAP1	YOL154W	ZPS1
YJL056C	ZAP1	YGL255W	ZRT1
YJL056C	ZAP1	YLR130C	ZRT2
YJL056C	ZAP1	YKL175W	ZRT3
YJR060W	CBF1	YCR088W	ABP1
YJR060W	CBF1	YDR530C	APA2
YJR060W	CBF1	YHR137W	ARO9
YJR060W	CBF1	YKL016C	ATP7
YJR060W	CBF1	YNL259C	ATX1
YJR060W	CBF1	YJL060W	BNA3
YJR060W	CBF1	YER114C	BOI2
YJR060W	CBF1	YLR267W	BOP2
YJR060W	CBF1	YJR060W	CBF1
YJR060W	CBF1	YDR054C	CDC34
YJR060W	CBF1	YDR254W	CHL4
YJR060W	CBF1	YPL018W	CTF19
YJR060W	CBF1	YKL139W	CTK1
YJR060W	CBF1	YDR141C	DOP1
YJR060W	CBF1	YAL026C	DRS2
YJR060W	CBF1	YGR200C	ELP2
YJR060W	CBF1	YJL167W	ERG20
YJR060W	CBF1	YHR089C	GAR1
YJR060W	CBF1	YCR098C	GIT1
YJR060W	CBF1	YGR154C	GTO1
YJR060W	CBF1	YIL116W	HIS5
YJR060W	CBF1	YER057C	HMF1
YJR060W	CBF1	YJR147W	HMS2
YJR060W	CBF1	YER052C	HOM3
YJR060W	CBF1	HOR2	HOR2
YJR060W	CBF1	YGR223C	HSV2
YJR060W	CBF1	YNR032C-A	HUB1
YJR060W	CBF1	YPL250C	ICY2
YJR060W	CBF1	YNL037C	IDH1
YJR060W	CBF1	YJR138W	IML1
YJR060W	CBF1	YNL104C	LEU4
YJR060W	CBF1	YFR030W	MET10
YJR060W	CBF1	YPR167C	MET16
YJR060W	CBF1	YNL277W	MET2
YJR060W	CBF1	YOL064C	MET22
YJR060W	CBF1	YJR010W	MET3
YJR060W	CBF1	YJR137C	MET5
YJR060W	CBF1	YBR213W	MET8
YJR060W	CBF1	YHR042W	NCP1
YJR060W	CBF1	YNL175C	NOP13
YJR060W	CBF1	YNL015W	PBI2
YJR060W	CBF1	YLR266C	PDR8
YJR060W	CBF1	YDR281C	PHM6
YJR060W	CBF1	YJL117W	PHO86
YJR060W	CBF1	YIL117C	PRM5
YJR060W	CBF1	YER099C	PRS2
YJR060W	CBF1	YBL068W	PRS4
YJR060W	CBF1	YDR055W	PST1
YJR060W	CBF1	YHR001W-A	QCR10
YJR060W	CBF1	YDR076W	RAD55
YJR060W	CBF1	YDL059C	RAD59
YJR060W	CBF1	YEL072W	RMD6
YJR060W	CBF1	YIL127C	RRT14
YJR060W	CBF1	YPL235W	RVB2
YJR060W	CBF1	YDR502C	SAM2
YJR060W	CBF1	YGR049W	SCM4
YJR060W	CBF1	YIL074C	SER33
YJR060W	CBF1	YDR023W	SES1
YJR060W	CBF1	YJL168C	SET2
YJR060W	CBF1	YMR095C	SNO1
YJR060W	CBF1	YHR136C	SPL2
YJR060W	CBF1	YIL126W	STH1
YJR060W	CBF1	YGL184C	STR3
YJR060W	CBF1	YHR099W	TRA1
YJR060W	CBF1	YER072W	VTC1
YJR060W	CBF1	YPL019C	VTC3
YJR060W	CBF1	YJL012C	VTC4
YJR060W	CBF1	YCL042W	YCL042W
YJR060W	CBF1	YCR087C-A	YCR087C-A
YJR060W	CBF1	YDR115W	YDR115W
YJR060W	CBF1	YEL043W	YEL043W
YJR060W	CBF1	YHR033W	YHR033W
YJR060W	CBF1	YLR149C	YLR149C
YJR060W	CBF1	YML119W	YML119W
YJR060W	CBF1	YFR049W	YMR31
YJR060W	CBF1	ZSP1	ZSP1
YKL038W	RGT1	YGL157W	ARI1
YKL038W	RGT1	YFL053W	DAK2
YKL038W	RGT1	YKR076W	ECM4
YKL038W	RGT1	YHR094C	HXT1
YKL038W	RGT1	YMR011W	HXT2
YKL038W	RGT1	YHR096C	HXT5
YKL038W	RGT1	YJL219W	HXT9
YKL038W	RGT1	YJL216C	IMA5
YKL038W	RGT1	YER028C	MIG3
YKL038W	RGT1	YJL212C	OPT1
YKL038W	RGT1	YER037W	PHM8
YKL038W	RGT1	YPL026C	SKS1
YKL038W	RGT1	YMR291W	TDA1
YKL038W	RGT1	YFL054C	YFL054C
YKL038W	RGT1	YGR050C	YGR050C
YKL038W	RGT1	YKR075C	YKR075C
YLR451W	LEU3	YER073W	ALD5
YLR451W	LEU3	YBR068C	BAP2
YLR451W	LEU3	YHR208W	BAT1
YLR451W	LEU3	YGR286C	BIO2
YLR451W	LEU3	YLR348C	DIC1
YLR451W	LEU3	YKR071C	DRE2
YLR451W	LEU3	YMR135C	GID8
YLR451W	LEU3	YJR016C	ILV3
YLR451W	LEU3	YOR226C	ISU2
YLR451W	LEU3	YGL009C	LEU1
YLR451W	LEU3	YNL104C	LEU4
YLR451W	LEU3	YKL120W	OAC1
YLR451W	LEU3	YHR063C	PAN5
YLR451W	LEU3	YPR002W	PDH1
YLR451W	LEU3	YFR033C	QCR6
YLR451W	LEU3	YBR069C	TAT1
YLR451W	LEU3	YBL029W	YBL029W
YLR451W	LEU3	YBR111C	YSA1
YMR182C	RGM1	YHL021C	AIM17
YMR182C	RGM1	YOR134W	BAG7
YMR182C	RGM1	YDR403W	DIT1
YMR182C	RGM1	YDR402C	DIT2
YMR182C	RGM1	YOR383C	FIT3
YMR182C	RGM1	YOR375C	GDH1
YMR182C	RGM1	YEL011W	GLC3
YMR182C	RGM1	YCL040W	GLK1
YMR182C	RGM1	YPR160W	GPH1
YMR182C	RGM1	YCL035C	GRX1
YMR182C	RGM1	YLR258W	GSY2
YMR182C	RGM1	YKL109W	HAP4
YMR182C	RGM1	YLR205C	HMX1
YMR182C	RGM1	YFL014W	HSP12
YMR182C	RGM1	YDR171W	HSP42
YMR182C	RGM1	YFR053C	HXK1
YMR182C	RGM1	YEL069C	HXT13
YMR182C	RGM1	YDL049C	KNH1
YMR182C	RGM1	YKL150W	MCR1
YMR182C	RGM1	YGR249W	MGA1
YMR182C	RGM1	YDL079C	MRK1
YMR182C	RGM1	YKL062W	MSN4
YMR182C	RGM1	YPR149W	NCE102
YMR182C	RGM1	YMR145C	NDE1
YMR182C	RGM1	YBR230C	OM14
YMR182C	RGM1	YNL015W	PBI2
YMR182C	RGM1	YMR105C	PGM2
YMR182C	RGM1	YER053C	PIC2
YMR182C	RGM1	YGL037C	PNC1
YMR182C	RGM1	YOR348C	PUT4
YMR182C	RGM1	YGL158W	RCK1
YMR182C	RGM1	YER067W	RGI1
YMR182C	RGM1	YMR182C	RGM1
YMR182C	RGM1	YOR107W	RGS2
YMR182C	RGM1	YDL204W	RTN2
YMR182C	RGM1	YKL148C	SDH1
YMR182C	RGM1	YDR178W	SDH4
YMR182C	RGM1	YER096W	SHC1
YMR182C	RGM1	YEL065W	SIT1
YMR182C	RGM1	YDL246C	SOR2
YMR182C	RGM1	YMR017W	SPO20
YMR182C	RGM1	YLR178C	TFS1
YMR182C	RGM1	YOR273C	TPO4
YMR182C	RGM1	YKL035W	UGP1
YMR182C	RGM1	YPL230W	USV1
YMR182C	RGM1	YBL029W	YBL029W
YMR182C	RGM1	YLL055W	YCT1
YMR182C	RGM1	YDL218W	YDL218W
YMR182C	RGM1	YEL068C	YEL068C
YMR182C	RGM1	YFL052W	YFL052W
YMR182C	RGM1	YGR066C	YGR066C
YMR182C	RGM1	YHR033W	YHR033W
YMR182C	RGM1	YKL091C	YKL091C
YMR182C	RGM1	YKL151C	YKL151C
YMR182C	RGM1	YLR312C	YLR312C
YMR182C	RGM1	YMR181C	YMR181C
YMR182C	RGM1	YNL144C	YNL144C
YMR182C	RGM1	YNR014W	YNR014W
YMR182C	RGM1	YNR073C	YNR073C
YMR182C	RGM1	YOL014W	YOL014W
YMR182C	RGM1	YOL109W	ZEO1
YNL199C	GCR2	YAL038W	CDC19
YNL199C	GCR2	YGR254W	ENO1
YNL199C	GCR2	YHR174W	ENO2
YNL199C	GCR2	YPL075W	GCR1
YNL199C	GCR2	YKL152C	GPM1
YNL199C	GCR2	YBR196C	PGI1
YNL199C	GCR2	YCR012W	PGK1
YNL199C	GCR2	YDR050C	TPI1
YOL108C	INO4	YJR105W	ADO1
YOL108C	INO4	YGR157W	CHO2
YOL108C	INO4	YBR177C	EHT1
YOL108C	INO4	YGL077C	HNM1
YOL108C	INO4	YDR497C	ITR1
YOL108C	INO4	YGL125W	MET13
YOL108C	INO4	YJR074W	MOG1
YOL108C	INO4	YDR502C	SAM2
YOL108C	INO4	YDR124W	YDR124W
YOL108C	INO4	YEL073C	YEL073C
YOR344C	TYE7	YOL086C	ADH1
YOR344C	TYE7	YPL075W	GCR1
YOR344C	TYE7	YOL059W	GPD2
YOR344C	TYE7	YKL152C	GPM1
YOR344C	TYE7	YJR010W	MET3
YOR344C	TYE7	YOL104C	NDJ1
YOR344C	TYE7	YJR103W	URA8
YPL075W	GCR1	YOL086C	ADH1
YPL075W	GCR1	YGL256W	ADH4
YPL075W	GCR1	YCR011C	ADP1
YPL075W	GCR1	YER177W	BMH1
YPL075W	GCR1	YAL038W	CDC19
YPL075W	GCR1	YDR516C	EMI2
YPL075W	GCR1	YHR174W	ENO2
YPL075W	GCR1	YKL060C	FBA1
YPL075W	GCR1	YKL152C	GPM1
YPL075W	GCR1	YDL021W	GPM2
YPL075W	GCR1	YFR053C	HXK1
YPL075W	GCR1	YHR015W	MIP6
YPL075W	GCR1	YOL104C	NDJ1
YPL075W	GCR1	YGR240C	PFK1
YPL075W	GCR1	YMR205C	PFK2
YPL075W	GCR1	YCR012W	PGK1
YPL075W	GCR1	YJL052W	TDH1
YPL075W	GCR1	YJR009C	TDH2
YPL075W	GCR1	YGR192C	TDH3
YPL248C	GAL4	YMR056C	AAC1
YPL248C	GAL4	YDR216W	ADR1
YPL248C	GAL4	YPR192W	AQY1
YPL248C	GAL4	YNR002C	ATO2
YPL248C	GAL4	YAL060W	BDH1
YPL248C	GAL4	YKL096W	CWP1
YPL248C	GAL4	YAL039C	CYC3
YPL248C	GAL4	YBR112C	CYC8
YPL248C	GAL4	YLR377C	FBP1
YPL248C	GAL4	YBR019C	GAL10
YPL248C	GAL4	YDR009W	GAL3
YPL248C	GAL4	YBR018C	GAL7
YPL248C	GAL4	YMR136W	GAT2
YPL248C	GAL4	YDR343C	HXT6
YPL248C	GAL4	YDL049C	KNH1
YPL248C	GAL4	YKL093W	MBR1
YPL248C	GAL4	YDL079C	MRK1
YPL248C	GAL4	YDR277C	MTH1
YPL248C	GAL4	YJL116C	NCA3
YPL248C	GAL4	YPR149W	NCE102
YPL248C	GAL4	YJL210W	PEX2
YPL248C	GAL4	YKR093W	PTR2
YPL248C	GAL4	YIL057C	RGI2
YPL248C	GAL4	YMR016C	SOK2
YPL248C	GAL4	YDL246C	SOR2
YPL248C	GAL4	YDL048C	STP4
YPL248C	GAL4	YLL028W	TPO1
YPL248C	GAL4	YPL230W	USV1
YPL248C	GAL4	YCR061W	YCR061W
YPL248C	GAL4	YEL057C	YEL057C
YPL248C	GAL4	YER130C	YER130C
YPL248C	GAL4	YER152C	YER152C
YPL248C	GAL4	YGR067C	YGR067C
YPL248C	GAL4	YKR075C	YKR075C
YPL248C	GAL4	YMR103C	YMR103C
YPL248C	GAL4	YOR291W	YPK9
YPL248C	GAL4	YPL067C	YPL067C
