# Supplementary material for: Dual threshold optimization and network inference reveal convergent evidence from TF binding locations and TF perturbation responses
Source: Genome Res. 2020 Mar;30(3):459–71. doi: 10.1101/gr.259655.119 (PMC7111528; doi:10.1101/gr.259655.119)
Supplement: Supplemental Material [file supp_gr.259655.119_Supplemental_File_S8.xlsx]

## Sheet: README
Supplemental File S8: Network edges from acceptable TFs to their bound and responsive genes after dual threshold optimization on calling cards and output from NetProphet 2.0 run ZEV 15 min, 45 min, and 90 min response data.
Column	Description
TF_systematicName	Transcription factor in systematic name
TF_commonName	Transcription factor in common name
Gene_systematicName	Target gene in systematic name
Gene_commonName	Traget gene in common name

## Sheet: Supplemental_File_S8
TF_systematicName	TF_commonName	Gene_systematicName	Gene_commonName
YDR034C	LYS14	YJL200C	ACO2
YDR034C	LYS14	YLR153C	ACS2
YDR034C	LYS14	YNR058W	BIO3
YDR034C	LYS14	YNR057C	BIO4
YDR034C	LYS14	YBR291C	CTP1
YDR034C	LYS14	YMR240C	CUS1
YDR034C	LYS14	YIR031C	DAL7
YDR034C	LYS14	YDR148C	KGD2
YDR034C	LYS14	YNL268W	LYP1
YDR034C	LYS14	YIR034C	LYS1
YDR034C	LYS14	YIL094C	LYS12
YDR034C	LYS14	YDR034C	LYS14
YDR034C	LYS14	YBR115C	LYS2
YDR034C	LYS14	YDL182W	LYS20
YDR034C	LYS14	YDL131W	LYS21
YDR034C	LYS14	YDR234W	LYS4
YDR034C	LYS14	YNR050C	LYS9
YDR034C	LYS14	YIL164C	NIT1
YDR034C	LYS14	YOR222W	ODC2
YDR034C	LYS14	YPL112C	PEX25
YDR034C	LYS14	YML107C	PML39
YDR034C	LYS14	YOR101W	RAS1
YDR034C	LYS14	YBR147W	RTC2
YDR034C	LYS14	YDL183C	YDL183C
YDR034C	LYS14	YDR056C	YDR056C
YDR034C	LYS14	YGR125W	YGR125W
YDR034C	LYS14	YMR241W	YHM2
YDR034C	LYS14	YDR057W	YOS9
YEL009C	GCN4	YBR145W	ADH5
YEL009C	GCN4	YER073W	ALD5
YEL009C	GCN4	YDR242W	AMD2
YEL009C	GCN4	YOL058W	ARG1
YEL009C	GCN4	YJL071W	ARG2
YEL009C	GCN4	YJL088W	ARG3
YEL009C	GCN4	YHR018C	ARG4
YEL009C	GCN4	YER069W	ARG5,6
YEL009C	GCN4	YMR062C	ARG7
YEL009C	GCN4	YOL140W	ARG8
YEL009C	GCN4	YDR127W	ARO1
YEL009C	GCN4	YGL148W	ARO2
YEL009C	GCN4	YDR035W	ARO3
YEL009C	GCN4	YBR249C	ARO4
YEL009C	GCN4	YPR145W	ASN1
YEL009C	GCN4	YBR068C	BAP2
YEL009C	GCN4	YKR099W	BAS1
YEL009C	GCN4	YHR208W	BAT1
YEL009C	GCN4	YJR025C	BNA1
YEL009C	GCN4	YNR069C	BSC5
YEL009C	GCN4	YFL028C	CAF16
YEL009C	GCN4	YJR109C	CPA2
YEL009C	GCN4	YIR030C	DCG1
YEL009C	GCN4	YHL016C	DUR3
YEL009C	GCN4	YDL198C	GGC1
YEL009C	GCN4	YGR154C	GTO1
YEL009C	GCN4	YER055C	HIS1
YEL009C	GCN4	YOR202W	HIS3
YEL009C	GCN4	YCL030C	HIS4
YEL009C	GCN4	YIL116W	HIS5
YEL009C	GCN4	YBR248C	HIS7
YEL009C	GCN4	YER052C	HOM3
YEL009C	GCN4	YMR195W	ICY1
YEL009C	GCN4	YPL250C	ICY2
YEL009C	GCN4	YDL066W	IDP1
YEL009C	GCN4	YJR016C	ILV3
YEL009C	GCN4	YLR355C	ILV5
YEL009C	GCN4	YPL135W	ISU1
YEL009C	GCN4	YNL104C	LEU4
YEL009C	GCN4	YOR108W	LEU9
YEL009C	GCN4	YIR034C	LYS1
YEL009C	GCN4	YBR115C	LYS2
YEL009C	GCN4	YDL182W	LYS20
YEL009C	GCN4	YDL131W	LYS21
YEL009C	GCN4	YNR050C	LYS9
YEL009C	GCN4	YKL029C	MAE1
YEL009C	GCN4	YOL119C	MCH4
YEL009C	GCN4	YOR221C	MCT1
YEL009C	GCN4	YGL125W	MET13
YEL009C	GCN4	YOL064C	MET22
YEL009C	GCN4	YHR162W	MPC2
YEL009C	GCN4	YOR201C	MRM1
YEL009C	GCN4	YNL036W	NCE103
YEL009C	GCN4	YIL164C	NIT1
YEL009C	GCN4	YOR222W	ODC2
YEL009C	GCN4	YOR130C	ORT1
YEL009C	GCN4	YNL221C	POP1
YEL009C	GCN4	YJL072C	PSF2
YEL009C	GCN4	YBR218C	PYC2
YEL009C	GCN4	YMR063W	RIM9
YEL009C	GCN4	YBR147W	RTC2
YEL009C	GCN4	YDL025C	RTK1
YEL009C	GCN4	YGR161C	RTS3
YEL009C	GCN4	YMR095C	SNO1
YEL009C	GCN4	YMR096W	SNZ1
YEL009C	GCN4	YPL092W	SSU1
YEL009C	GCN4	YMR019W	STB4
YEL009C	GCN4	YJR130C	STR2
YEL009C	GCN4	YGL184C	STR3
YEL009C	GCN4	YBR294W	SUL1
YEL009C	GCN4	YOR337W	TEA1
YEL009C	GCN4	YER175C	TMT1
YEL009C	GCN4	YKL211C	TRP3
YEL009C	GCN4	YDR354W	TRP4
YEL009C	GCN4	YGL026C	TRP5
YEL009C	GCN4	YDL170W	UGA3
YEL009C	GCN4	YDR341C	YDR341C
YEL009C	GCN4	YHR020W	YHR020W
YEL009C	GCN4	YJR111C	YJR111C
YEL009C	GCN4	YLR152C	YLR152C
YEL009C	GCN4	YBR104W	YMC2
YEL009C	GCN4	YOR302W	YOR302W
YIL036W	CST6	YOR128C	ADE2
YIL036W	CST6	YLR109W	AHP1
YIL036W	CST6	YLR089C	ALT1
YIL036W	CST6	YDR111C	ALT2
YIL036W	CST6	YOL058W	ARG1
YIL036W	CST6	YAL061W	BDH2
YIL036W	CST6	YOL164W	BDS1
YIL036W	CST6	YOR028C	CIN5
YIL036W	CST6	YGR108W	CLB1
YIL036W	CST6	YJR109C	CPA2
YIL036W	CST6	YOL052C-A	DDR2
YIL036W	CST6	YPL265W	DIP5
YIL036W	CST6	YEL071W	DLD3
YIL036W	CST6	YBL043W	ECM13
YIL036W	CST6	YOR317W	FAA1
YIL036W	CST6	YJL161W	FMP33
YIL036W	CST6	YOR120W	GCY1
YIL036W	CST6	YDR508C	GNP1
YIL036W	CST6	YOL155C	HPF1
YIL036W	CST6	YFL014W	HSP12
YIL036W	CST6	YPL135W	ISU1
YIL036W	CST6	YNR050C	LYS9
YIL036W	CST6	YML128C	MSC1
YIL036W	CST6	YMR164C	MSS11
YIL036W	CST6	YJL116C	NCA3
YIL036W	CST6	YNL036W	NCE103
YIL036W	CST6	YKR093W	PTR2
YIL036W	CST6	YGL062W	PYC1
YIL036W	CST6	YHL024W	RIM4
YIL036W	CST6	YPL024W	RMI1
YIL036W	CST6	YPR065W	ROX1
YIL036W	CST6	YDL204W	RTN2
YIL036W	CST6	YPL274W	SAM3
YIL036W	CST6	YMR175W	SIP18
YIL036W	CST6	YDR536W	STL1
YIL036W	CST6	YJL164C	TPK1
YIL036W	CST6	YGR065C	VHT1
YIL036W	CST6	YAR068W	YAR068W
YIL036W	CST6	YER024W	YAT2
YIL036W	CST6	YBR085C-A	YBR085C-A
YIL036W	CST6	YER053C-A	YER053C-A
YIL036W	CST6	YGR066C	YGR066C
YIL036W	CST6	YLR053C	YLR053C
YIL036W	CST6	YLR108C	YLR108C
YIL036W	CST6	YNR014W	YNR014W
YIL036W	CST6	YOR302W	YOR302W
YIL036W	CST6	YGL255W	ZRT1
YJL056C	ZAP1	YNL254C	RTC4
YJL056C	ZAP1	YJL056C	ZAP1
YJL056C	ZAP1	YOL154W	ZPS1
YJL056C	ZAP1	YGL255W	ZRT1
YJL056C	ZAP1	YLR130C	ZRT2
YJL056C	ZAP1	YKL175W	ZRT3
YJR060W	CBF1	YNL220W	ADE12
YJR060W	CBF1	YGR204W	ADE3
YJR060W	CBF1	YMR083W	ADH3
YJR060W	CBF1	YCR011C	ADP1
YJR060W	CBF1	YDR530C	APA2
YJR060W	CBF1	YNL094W	APP1
YJR060W	CBF1	YNR019W	ARE2
YJR060W	CBF1	YDR022C	ATG31
YJR060W	CBF1	YBR039W	ATP3
YJR060W	CBF1	YKL016C	ATP7
YJR060W	CBF1	YNL259C	ATX1
YJR060W	CBF1	YIL088C	AVT7
YJR060W	CBF1	YER177W	BMH1
YJR060W	CBF1	YJL060W	BNA3
YJR060W	CBF1	YER114C	BOI2
YJR060W	CBF1	YBL097W	BRN1
YJR060W	CBF1	YJR060W	CBF1
YJR060W	CBF1	YDR267C	CIA1
YJR060W	CBF1	YJL158C	CIS3
YJR060W	CBF1	YOR039W	CKB2
YJR060W	CBF1	YPR030W	CSR2
YJR060W	CBF1	YPL018W	CTF19
YJR060W	CBF1	YPL170W	DAP1
YJR060W	CBF1	YDR141C	DOP1
YJR060W	CBF1	YKL191W	DPH2
YJR060W	CBF1	YAL026C	DRS2
YJR060W	CBF1	YKR004C	ECM9
YJR060W	CBF1	YJL167W	ERG20
YJR060W	CBF1	YHR089C	GAR1
YJR060W	CBF1	YCL035C	GRX1
YJR060W	CBF1	YDR513W	GRX2
YJR060W	CBF1	YJL101C	GSH1
YJR060W	CBF1	YGR154C	GTO1
YJR060W	CBF1	YML121W	GTR1
YJR060W	CBF1	YPL189W	GUP2
YJR060W	CBF1	YFL031W	HAC1
YJR060W	CBF1	YIL116W	HIS5
YJR060W	CBF1	YER057C	HMF1
YJR060W	CBF1	HOR2	HOR2
YJR060W	CBF1	YLR301W	HRI1
YJR060W	CBF1	YNR032C-A	HUB1
YJR060W	CBF1	YPL250C	ICY2
YJR060W	CBF1	YNL037C	IDH1
YJR060W	CBF1	YEL044W	IES6
YJR060W	CBF1	YJR138W	IML1
YJR060W	CBF1	YHR082C	KSP1
YJR060W	CBF1	YOR099W	KTR1
YJR060W	CBF1	YDL051W	LHP1
YJR060W	CBF1	YDR503C	LPP1
YJR060W	CBF1	YKR069W	MET1
YJR060W	CBF1	YFR030W	MET10
YJR060W	CBF1	YGL125W	MET13
YJR060W	CBF1	YKL001C	MET14
YJR060W	CBF1	YPR167C	MET16
YJR060W	CBF1	YNL277W	MET2
YJR060W	CBF1	YOL064C	MET22
YJR060W	CBF1	YIR017C	MET28
YJR060W	CBF1	YJR010W	MET3
YJR060W	CBF1	YDR253C	MET32
YJR060W	CBF1	YJR137C	MET5
YJR060W	CBF1	YBR213W	MET8
YJR060W	CBF1	YER001W	MNN1
YJR060W	CBF1	YKL201C	MNN4
YJR060W	CBF1	YHL004W	MRP4
YJR060W	CBF1	YCR092C	MSH3
YJR060W	CBF1	YNL063W	MTQ1
YJR060W	CBF1	YPL190C	NAB3
YJR060W	CBF1	YNL036W	NCE103
YJR060W	CBF1	NHP6b	NHP6b
YJR060W	CBF1	YNL175C	NOP13
YJR060W	CBF1	YPL171C	OYE3
YJR060W	CBF1	YBR222C	PCS60
YJR060W	CBF1	YGR087C	PDC6
YJR060W	CBF1	YLR266C	PDR8
YJR060W	CBF1	YIL107C	PFK26
YJR060W	CBF1	YPL206C	PGC1
YJR060W	CBF1	YDR281C	PHM6
YJR060W	CBF1	YJL117W	PHO86
YJR060W	CBF1	YER053C	PIC2
YJR060W	CBF1	YNL221C	POP1
YJR060W	CBF1	YER099C	PRS2
YJR060W	CBF1	YBL068W	PRS4
YJR060W	CBF1	YAL017W	PSK1
YJR060W	CBF1	YML017W	PSP2
YJR060W	CBF1	YDR055W	PST1
YJR060W	CBF1	YHR001W-A	QCR10
YJR060W	CBF1	YFL033C	RIM15
YJR060W	CBF1	YEL072W	RMD6
YJR060W	CBF1	YDL020C	RPN4
YJR060W	CBF1	RPS21a	RPS21a
YJR060W	CBF1	YJR113C	RSM7
YJR060W	CBF1	YPL235W	RVB2
YJR060W	CBF1	YDR502C	SAM2
YJR060W	CBF1	YGL056C	SDS23
YJR060W	CBF1	YIL074C	SER33
YJR060W	CBF1	YHR098C	SFB3
YJR060W	CBF1	YDR510W	SMT3
YJR060W	CBF1	YOR327C	SNC2
YJR060W	CBF1	YHR136C	SPL2
YJR060W	CBF1	YBR250W	SPO23
YJR060W	CBF1	YIL126W	STH1
YJR060W	CBF1	YLR092W	SUL2
YJR060W	CBF1	YER071C	TDA2
YJR060W	CBF1	YJL052W	TDH1
YJR060W	CBF1	YJR009C	TDH2
YJR060W	CBF1	YHR099W	TRA1
YJR060W	CBF1	YDL112W	TRM3
YJR060W	CBF1	YER100W	UBC6
YJR060W	CBF1	YJL109C	UTP10
YJR060W	CBF1	YER072W	VTC1
YJR060W	CBF1	YMR197C	VTI1
YJR060W	CBF1	YAL018C	YAL018C
YJR060W	CBF1	YBR255C-A	YBR255C-A
YJR060W	CBF1	YLL055W	YCT1
YJR060W	CBF1	YDL073W	YDL073W
YJR060W	CBF1	YDL241W	YDL241W
YJR060W	CBF1	YDR061W	YDR061W
YJR060W	CBF1	YDR381C-A	YDR381C-A
YJR060W	CBF1	YIR042C	YIR042C
YJR060W	CBF1	YJL052C-A	YJL052C-A
YJR060W	CBF1	YJR115W	YJR115W
YJR060W	CBF1	YKR073C	YKR073C
YJR060W	CBF1	YLR149C	YLR149C
YJR060W	CBF1	YLR162W	YLR162W
YJR060W	CBF1	YML122C	YML122C
YJR060W	CBF1	YMR122C	YMR122C
YJR060W	CBF1	YFR049W	YMR31
YJR060W	CBF1	YOR064C	YNG1
YJR060W	CBF1	YNL095C	YNL095C
YJR060W	CBF1	YER074W-A	YOS1
YJR060W	CBF1	YOR087W	YVC1
YKL038W	RGT1	YNL065W	AQR1
YKL038W	RGT1	YGL157W	ARI1
YKL038W	RGT1	YKR099W	BAS1
YKL038W	RGT1	YFL053W	DAK2
YKL038W	RGT1	YHR094C	HXT1
YKL038W	RGT1	YMR011W	HXT2
YKL038W	RGT1	YDR345C	HXT3
YKL038W	RGT1	YHR092C	HXT4
YKL038W	RGT1	YDR343C	HXT6
YKL038W	RGT1	YGL209W	MIG2
YKL038W	RGT1	YER028C	MIG3
YKL038W	RGT1	YDR277C	MTH1
YKL038W	RGT1	YGL158W	RCK1
YKL038W	RGT1	YPL026C	SKS1
YKL038W	RGT1	YOR047C	STD1
YKL038W	RGT1	YMR291W	TDA1
YKL038W	RGT1	YKR098C	UBP11
YKL038W	RGT1	YKR075C	YKR075C
YKL038W	RGT1	YLR108C	YLR108C
YKL038W	RGT1	YNL234W	YNL234W
YKL038W	RGT1	YOR062C	YOR062C
YLR403W	SFP1	YGR068C	ART5
YLR403W	SFP1	YOR178C	GAC1
YLR403W	SFP1	YNL255C	GIS2
YLR403W	SFP1	YMR108W	ILV2
YLR403W	SFP1	YLR432W	IMD3
YLR403W	SFP1	YBR086C	IST2
YLR403W	SFP1	YOR108W	LEU9
YLR403W	SFP1	YJR070C	LIA1
YLR403W	SFP1	YPR070W	MED1
YLR403W	SFP1	YOR370C	MRS6
YLR403W	SFP1	YBR025C	OLA1
YLR403W	SFP1	YPL246C	RBD2
YLR403W	SFP1	YBR087W	RFC5
YLR403W	SFP1	YLR073C	RFU1
YLR403W	SFP1	YMR182C	RGM1
YLR403W	SFP1	YOR095C	RKI1
YLR403W	SFP1	YJL080C	SCP160
YLR403W	SFP1	YEL026W	SNU13
YLR403W	SFP1	YPR069C	SPE3
YLR403W	SFP1	YNL209W	SSB2
YLR403W	SFP1	SUR4	SUR4
YLR403W	SFP1	YKL027W	TCD2
YLR403W	SFP1	YGR162W	TIF4631
YLR403W	SFP1	YKL056C	TMA19
YLR403W	SFP1	YDR119W	VBA4
YLR403W	SFP1	YJL154C	VPS35
YLR403W	SFP1	YOR342C	YOR342C
YLR403W	SFP1	YPL245W	YPL245W
YLR403W	SFP1	YLR130C	ZRT2
YLR451W	LEU3	YGL071W	AFT1
YLR451W	LEU3	YER073W	ALD5
YLR451W	LEU3	YBR068C	BAP2
YLR451W	LEU3	YHR208W	BAT1
YLR451W	LEU3	YPL161C	BEM4
YLR451W	LEU3	YGR286C	BIO2
YLR451W	LEU3	YLR438W	CAR2
YLR451W	LEU3	YPL160W	CDC60
YLR451W	LEU3	YLR348C	DIC1
YLR451W	LEU3	YLR437C	DIF1
YLR451W	LEU3	YLL043W	FPS1
YLR451W	LEU3	YFL022C	FRS2
YLR451W	LEU3	YOR271C	FSF1
YLR451W	LEU3	YFL021W	GAT1
YLR451W	LEU3	YMR136W	GAT2
YLR451W	LEU3	YMR135C	GID8
YLR451W	LEU3	YML006C	GIS4
YLR451W	LEU3	YFR015C	GSY1
YLR451W	LEU3	YGR163W	GTR2
YLR451W	LEU3	YMR108W	ILV2
YLR451W	LEU3	YJR016C	ILV3
YLR451W	LEU3	YLR355C	ILV5
YLR451W	LEU3	YDR123C	INO2
YLR451W	LEU3	YOR155C	ISN1
YLR451W	LEU3	YOR226C	ISU2
YLR451W	LEU3	YDL049C	KNH1
YLR451W	LEU3	YGL009C	LEU1
YLR451W	LEU3	YNL104C	LEU4
YLR451W	LEU3	YOR108W	LEU9
YLR451W	LEU3	YKL029C	MAE1
YLR451W	LEU3	YGL125W	MET13
YLR451W	LEU3	YIL051C	MMF1
YLR451W	LEU3	YOR274W	MOD5
YLR451W	LEU3	YMR070W	MOT3
YLR451W	LEU3	YKL120W	OAC1
YLR451W	LEU3	YHR063C	PAN5
YLR451W	LEU3	YIL050W	PCL7
YLR451W	LEU3	YPR002W	PDH1
YLR451W	LEU3	YNL231C	PDR16
YLR451W	LEU3	YNL055C	POR1
YLR451W	LEU3	YER075C	PTP3
YLR451W	LEU3	YFR033C	QCR6
YLR451W	LEU3	YJR046W	TAH11
YLR451W	LEU3	YBR069C	TAT1
YLR451W	LEU3	YMR291W	TDA1
YLR451W	LEU3	YPR157W	TDA6
YLR451W	LEU3	YBR083W	TEC1
YLR451W	LEU3	YGR020C	VMA7
YLR451W	LEU3	YBL029W	YBL029W
YLR451W	LEU3	YDR124W	YDR124W
YLR451W	LEU3	YFR035C	YFR035C
YLR451W	LEU3	YGR021W	YGR021W
YLR451W	LEU3	YGR067C	YGR067C
YLR451W	LEU3	YKR075C	YKR075C
YLR451W	LEU3	YBR111C	YSA1
YMR182C	RGM1	YPL236C	ENV7
YMR182C	RGM1	YDR096W	GIS1
YMR182C	RGM1	YFR015C	GSY1
YMR182C	RGM1	YPL189W	GUP2
YMR182C	RGM1	YDR171W	HSP42
YMR182C	RGM1	YGR287C	IMA1
YMR182C	RGM1	YGR249W	MGA1
YMR182C	RGM1	YKL062W	MSN4
YMR182C	RGM1	YOR107W	RGS2
YMR182C	RGM1	YIL119C	RPI1
YMR182C	RGM1	YDL246C	SOR2
YMR182C	RGM1	YER011W	TIR1
YMR182C	RGM1	YGL179C	TOS3
YMR182C	RGM1	YHL028W	WSC4
YMR182C	RGM1	YLR177W	YLR177W
YMR182C	RGM1	YLR413W	YLR413W
YMR182C	RGM1	YMR181C	YMR181C
YMR182C	RGM1	YNR073C	YNR073C
YMR182C	RGM1	YOR387C	YOR387C
YMR182C	RGM1	YPR064W	YPR064W
YNL199C	GCR2	YOL086C	ADH1
YNL199C	GCR2	YER177W	BMH1
YNL199C	GCR2	YAL038W	CDC19
YNL199C	GCR2	YGR254W	ENO1
YNL199C	GCR2	YHR174W	ENO2
YNL199C	GCR2	YKL060C	FBA1
YNL199C	GCR2	YPL075W	GCR1
YNL199C	GCR2	YKL152C	GPM1
YNL199C	GCR2	YJR010W	MET3
YNL199C	GCR2	YGR240C	PFK1
YNL199C	GCR2	YMR205C	PFK2
YNL199C	GCR2	YBR196C	PGI1
YNL199C	GCR2	YCR012W	PGK1
YNL199C	GCR2	YJR009C	TDH2
YNL199C	GCR2	YDR050C	TPI1
YOL108C	INO4	YJR105W	ADO1
YOL108C	INO4	YGR157W	CHO2
YOL108C	INO4	YLR133W	CKI1
YOL108C	INO4	YLR380W	CSR1
YOL108C	INO4	YBR177C	EHT1
YOL108C	INO4	YOR317W	FAA1
YOL108C	INO4	YNL256W	FOL1
YOL108C	INO4	YJL101C	GSH1
YOL108C	INO4	YGL077C	HNM1
YOL108C	INO4	YJL153C	INO1
YOL108C	INO4	YDR123C	INO2
YOL108C	INO4	YDR497C	ITR1
YOL108C	INO4	YDL049C	KNH1
YOL108C	INO4	YGL125W	MET13
YOL108C	INO4	YJR074W	MOG1
YOL108C	INO4	YHL020C	OPI1
YOL108C	INO4	YJR073C	OPI3
YOL108C	INO4	YDR502C	SAM2
YOL108C	INO4	YNL257C	SIP3
YOL108C	INO4	YJR104C	SOD1
YOL108C	INO4	YIL047C	SYG1
YOL108C	INO4	YLR132C	USB1
YOL108C	INO4	YOR230W	WTM1
YOL108C	INO4	YDR124W	YDR124W
YOL108C	INO4	YEL073C	YEL073C
YOL108C	INO4	YHR033W	YHR033W
YOL108C	INO4	YLR108C	YLR108C
YOR344C	TYE7	YOL086C	ADH1
YOR344C	TYE7	YAL038W	CDC19
YOR344C	TYE7	YGR254W	ENO1
YOR344C	TYE7	YHR174W	ENO2
YOR344C	TYE7	YKL060C	FBA1
YOR344C	TYE7	YPL075W	GCR1
YOR344C	TYE7	YOL059W	GPD2
YOR344C	TYE7	YKL152C	GPM1
YOR344C	TYE7	YLR044C	PDC1
YOR344C	TYE7	YMR205C	PFK2
YOR344C	TYE7	YJR009C	TDH2
YOR344C	TYE7	YGR192C	TDH3
YOR344C	TYE7	YER138W-A	YER138W-A
YOR344C	TYE7	YMR206W	YMR206W
YPL075W	GCR1	YER177W	BMH1
YPL075W	GCR1	YAL038W	CDC19
YPL075W	GCR1	YGR254W	ENO1
YPL075W	GCR1	YHR174W	ENO2
YPL075W	GCR1	YKL060C	FBA1
YPL075W	GCR1	YPL075W	GCR1
YPL075W	GCR1	YPR160W	GPH1
YPL075W	GCR1	YKL152C	GPM1
YPL075W	GCR1	YDL021W	GPM2
YPL075W	GCR1	YOL104C	NDJ1
YPL075W	GCR1	YOR193W	PEX27
YPL075W	GCR1	YCR012W	PGK1
YPL075W	GCR1	YOL084W	PHM7
YPL075W	GCR1	YJL052W	TDH1
YPL075W	GCR1	YJR009C	TDH2
YPL075W	GCR1	YGR192C	TDH3
YPL075W	GCR1	YGR260W	TNA1
YPL248C	GAL4	YBR021W	FUR4
YPL248C	GAL4	YBR020W	GAL1
YPL248C	GAL4	YLR081W	GAL2
YPL248C	GAL4	YDR009W	GAL3
YPL248C	GAL4	YBR018C	GAL7
YPL248C	GAL4	YML051W	GAL80
YPL248C	GAL4	YOR120W	GCY1
YPL248C	GAL4	YNL074C	MLF3
YPL248C	GAL4	YNL073W	MSK1
YPL248C	GAL4	YDR277C	MTH1
YPL248C	GAL4	YMR145C	NDE1
YPL248C	GAL4	YGL134W	PCL10
YPL248C	GAL4	YKR093W	PTR2
YPL248C	GAL4	YLR142W	PUT1
YPL248C	GAL4	YPL066W	RGL1
YPL248C	GAL4	YOR119C	RIO1
YPL248C	GAL4	YDL246C	SOR2
YPL248C	GAL4	YEL057C	YEL057C
YPL248C	GAL4	YPL067C	YPL067C
