# Supplementary material for: Dual threshold optimization and network inference reveal convergent evidence from TF binding locations and TF perturbation responses
Source: Genome Res. 2020 Mar;30(3):459–71. doi: 10.1101/gr.259655.119 (PMC7111528; doi:10.1101/gr.259655.119)
Supplement: Supplemental Material [file supp_gr.259655.119_Supplemental_File_S11.xlsx]

## Sheet: README
Supplemental File S11: Network edges from acceptable TFs to their bound and responsive targets after combining the TFKO, TFKD, ChIP-chip, ChIP-exo, and calling cards data sets as described in the section “Combining all available data sets yields the best result.”
Column	Description
TF_systematicName	Transcription factor in systematic name
TF_commonName	Transcription factor in common name
Gene_systematicName	Target gene in systematic name
Gene_commonName	Traget gene in common name
CallingCards-NP(TFKO)	Edges supported by running DTO on calling cards and NetProphet-processed TFKO response data
CallingCards-NP(ZEV)	Edges supported by running DTO on calling cards and NetProphet-processed ZEV response data
ChIP-NP(TFKO)	Edges supported by running DTO on ChIP-chip and NetProphet-processed TFKO response data
ChIP-NP(ZEV)	Edges supported by running DTO on ChIP-chip and NetProphet-processed ZEV response data
ChIPexo-NP(TFKO)	Edges supported by running DTO on ChIP-exo and NetProphet-processed TFKO response data
ChIPexo-NP(ZEV)	Edges supported by running DTO on ChIP-exo and NetProphet-processed ZEV response data

## Sheet: Supplemental_File_S11
TF_systematicName	TF_commonName	Gene_systematicName	Gene_commonName	CallingCards-NP(TFKO)	CallingCards-NP(ZEV)	ChIP-NP(TFKO)	ChIP-NP(ZEV)	ChIPexo-NP(TFKO)	ChIPexo-NP(ZEV)
YAL051W	OAF1	YJR105W	ADO1	0	0	0	0	0	1
YAL051W	OAF1	YPL061W	ALD6	0	0	0	0	0	1
YAL051W	OAF1	YPR128C	ANT1	0	0	0	0	0	1
YAL051W	OAF1	YMR042W	ARG80	0	0	0	0	0	1
YAL051W	OAF1	YNR002C	ATO2	0	0	0	0	0	1
YAL051W	OAF1	YIL159W	BNR1	0	0	0	0	0	1
YAL051W	OAF1	YOR100C	CRC1	0	0	0	0	0	1
YAL051W	OAF1	YPR030W	CSR2	0	0	0	0	0	1
YAL051W	OAF1	YML101C	CUE4	0	0	0	0	0	1
YAL051W	OAF1	YOR065W	CYT1	0	0	0	0	0	1
YAL051W	OAF1	YOL052C-A	DDR2	0	0	0	0	0	1
YAL051W	OAF1	YER088C	DOT6	0	0	0	0	0	1
YAL051W	OAF1	YLR401C	DUS3	0	0	0	0	0	1
YAL051W	OAF1	YBL043W	ECM13	0	0	0	0	0	1
YAL051W	OAF1	YER035W	EDC2	0	0	0	0	0	1
YAL051W	OAF1	YPL095C	EEB1	0	0	0	0	1	1
YAL051W	OAF1	YJL196C	ELO1	0	0	0	0	0	1
YAL051W	OAF1	YGR175C	ERG1	0	0	0	0	0	1
YAL051W	OAF1	YHR007C	ERG11	0	0	0	0	0	1
YAL051W	OAF1	YGR060W	ERG25	0	0	0	0	0	1
YAL051W	OAF1	YML008C	ERG6	0	0	0	0	0	1
YAL051W	OAF1	YOR317W	FAA1	0	0	0	0	0	1
YAL051W	OAF1	YER015W	FAA2	0	0	0	0	1	1
YAL051W	OAF1	YMR246W	FAA4	0	0	0	0	0	1
YAL051W	OAF1	YFL021W	GAT1	0	0	0	0	0	1
YAL051W	OAF1	YDR096W	GIS1	0	0	0	0	0	1
YAL051W	OAF1	YDR508C	GNP1	0	0	0	0	0	1
YAL051W	OAF1	YMR217W	GUA1	0	0	0	0	0	1
YAL051W	OAF1	YKL109W	HAP4	0	0	0	0	0	1
YAL051W	OAF1	YOR319W	HSH49	0	0	0	0	0	1
YAL051W	OAF1	YFL014W	HSP12	0	0	0	0	0	1
YAL051W	OAF1	YBR072W	HSP26	0	0	0	0	0	1
YAL051W	OAF1	YER065C	ICL1	0	0	0	0	0	1
YAL051W	OAF1	YLR174W	IDP2	0	0	0	0	0	1
YAL051W	OAF1	YEL044W	IES6	0	0	0	0	0	1
YAL051W	OAF1	YFR055W	IRC7	0	0	0	0	0	1
YAL051W	OAF1	YPL135W	ISU1	0	0	0	0	0	1
YAL051W	OAF1	YDR492W	IZH1	0	0	0	0	0	1
YAL051W	OAF1	YOL002C	IZH2	0	0	0	0	0	1
YAL051W	OAF1	YNL104C	LEU4	0	0	0	0	0	1
YAL051W	OAF1	YGR244C	LSC2	0	0	0	0	0	1
YAL051W	OAF1	YBR297W	MAL33	0	0	0	0	0	1
YAL051W	OAF1	YOL126C	MDH2	0	0	0	0	0	1
YAL051W	OAF1	YDL078C	MDH3	0	0	0	0	0	1
YAL051W	OAF1	YNL103W	MET4	0	0	0	0	0	1
YAL051W	OAF1	YJL116C	NCA3	0	0	0	0	0	1
YAL051W	OAF1	YGL055W	OLE1	0	0	0	0	0	1
YAL051W	OAF1	YDR406W	PDR15	0	0	0	0	0	1
YAL051W	OAF1	YNL231C	PDR16	0	0	0	0	0	1
YAL051W	OAF1	YOL147C	PEX11	0	0	0	0	0	1
YAL051W	OAF1	YDR244W	PEX5	0	0	0	0	1	1
YAL051W	OAF1	YNL149C	PGA2	0	0	0	0	0	1
YAL051W	OAF1	YOL084W	PHM7	0	0	0	0	0	1
YAL051W	OAF1	YFR034C	PHO4	0	0	0	0	0	1
YAL051W	OAF1	YMR008C	PLB1	0	0	0	0	0	1
YAL051W	OAF1	YEL017C-A	PMP2	0	0	0	0	0	1
YAL051W	OAF1	YDR276C	PMP3	0	0	0	0	0	1
YAL051W	OAF1	YIL160C	POT1	0	0	0	0	0	1
YAL051W	OAF1	YDR243C	PRP28	0	0	0	0	0	1
YAL051W	OAF1	YBL064C	PRX1	0	0	0	0	0	1
YAL051W	OAF1	YER075C	PTP3	0	0	0	0	0	1
YAL051W	OAF1	YKR093W	PTR2	0	0	0	0	1	1
YAL051W	OAF1	YOR348C	PUT4	0	0	0	0	0	1
YAL051W	OAF1	YGL062W	PYC1	0	0	0	0	0	1
YAL051W	OAF1	YFR033C	QCR6	0	0	0	0	0	1
YAL051W	OAF1	YOR101W	RAS1	0	0	0	0	0	1
YAL051W	OAF1	YOR107W	RGS2	0	0	0	0	0	1
YAL051W	OAF1	YNL180C	RHO5	0	0	0	0	0	1
YAL051W	OAF1	YHL024W	RIM4	0	0	0	0	0	1
YAL051W	OAF1	RPS16a	RPS16a	0	0	0	0	0	1
YAL051W	OAF1	YGL056C	SDS23	0	0	0	0	0	1
YAL051W	OAF1	YLR403W	SFP1	0	0	0	0	0	1
YAL051W	OAF1	YMR216C	SKY1	0	0	0	0	0	1
YAL051W	OAF1	YEL059C-A	SOM1	0	0	0	0	0	1
YAL051W	OAF1	YNL202W	SPS19	0	0	0	0	0	1
YAL051W	OAF1	YPR151C	SUE1	0	0	0	0	0	1
YAL051W	OAF1	YPR080W	TEF1	0	0	0	0	0	1
YAL051W	OAF1	YJR019C	TES1	0	0	0	0	0	1
YAL051W	OAF1	YEL020W-A	TIM9	0	0	0	0	0	1
YAL051W	OAF1	YER011W	TIR1	0	0	0	0	0	1
YAL051W	OAF1	YLR327C	TMA10	0	0	0	0	0	1
YAL051W	OAF1	YDL110C	TMA17	0	0	0	0	1	1
YAL051W	OAF1	YOR273C	TPO4	0	0	0	0	1	1
YAL051W	OAF1	YOL125W	TRM13	0	0	0	0	0	1
YAL051W	OAF1	YML100W	TSL1	0	0	0	0	0	1
YAL051W	OAF1	YIL056W	VHR1	0	0	0	0	1	1
YAL051W	OAF1	YER034W	YER034W	0	0	0	0	0	1
YAL051W	OAF1	YGR035C	YGR035C	0	0	0	0	1	1
YAL051W	OAF1	YLR152C	YLR152C	0	0	0	0	0	1
YBL005W	PDR3	YBL006C	LDB7	0	0	1	1	0	0
YBL005W	PDR3	YBL005W	PDR3	0	0	1	1	0	0
YBL021C	HAP3	YBR039W	ATP3	0	0	1	0	0	0
YBL021C	HAP3	YLR220W	CCC1	0	0	1	0	0	0
YBL021C	HAP3	YGL187C	COX4	0	0	1	0	0	0
YBL021C	HAP3	YHR051W	COX6	0	0	1	0	0	0
YBL021C	HAP3	YER174C	GRX4	0	0	1	0	0	0
YBL021C	HAP3	YML120C	NDI1	0	0	1	0	0	0
YBL021C	HAP3	YHR001W-A	QCR10	0	0	1	0	0	0
YBL021C	HAP3	YPL207W	TYW1	0	0	1	0	0	0
YBL103C	RTG3	YLR304C	ACO1	0	0	0	0	1	1
YBL103C	RTG3	YNR001C	CIT1	0	0	0	0	1	0
YBL103C	RTG3	YCR005C	CIT2	0	0	0	0	1	1
YBL103C	RTG3	YEL071W	DLD3	0	0	0	0	1	1
YBL103C	RTG3	YHR162W	MPC2	0	0	0	0	0	1
YBL103C	RTG3	YMR107W	SPG4	0	0	0	0	0	1
YBR033W	EDS1	YGL157W	ARI1	1	0	0	0	0	0
YBR033W	EDS1	YMR011W	HXT2	1	0	0	0	0	0
YBR033W	EDS1	YER028C	MIG3	1	0	0	0	0	0
YBR033W	EDS1	YJL212C	OPT1	1	0	0	0	0	0
YBR033W	EDS1	YMR291W	TDA1	1	0	0	0	0	0
YBR033W	EDS1	YKR075C	YKR075C	1	0	0	0	0	0
YBR083W	TEC1	YAR015W	ADE1	0	0	0	1	0	0
YBR083W	TEC1	YOR129C	AFI1	0	0	0	1	0	0
YBR083W	TEC1	YNR044W	AGA1	0	0	1	0	0	0
YBR083W	TEC1	YGL032C	AGA2	0	0	0	1	0	0
YBR083W	TEC1	YBR200W	BEM1	0	0	0	1	0	0
YBR083W	TEC1	YAR014C	BUD14	0	0	0	1	0	0
YBR083W	TEC1	YLR353W	BUD8	0	0	0	1	0	0
YBR083W	TEC1	YAL041W	CDC24	0	0	0	1	0	0
YBR083W	TEC1	YHR142W	CHS7	0	0	0	1	0	0
YBR083W	TEC1	YMR199W	CLN1	0	0	0	1	0	0
YBR083W	TEC1	YKL179C	COY1	0	0	0	1	0	0
YBR083W	TEC1	YNR028W	CPR8	0	0	0	1	0	0
YBR083W	TEC1	YGR189C	CRH1	0	0	1	1	0	0
YBR083W	TEC1	YKL096W	CWP1	0	0	1	0	0	0
YBR083W	TEC1	YKL096W-A	CWP2	0	0	0	1	0	0
YBR083W	TEC1	YGR007W	ECT1	0	0	0	1	0	0
YBR083W	TEC1	YFL048C	EMP47	0	0	0	1	0	0
YBR083W	TEC1	YCR089W	FIG2	0	0	1	0	0	0
YBR083W	TEC1	YCL027W	FUS1	0	0	1	1	0	0
YBR083W	TEC1	YBL016W	FUS3	0	0	1	1	0	0
YBR083W	TEC1	YMR136W	GAT2	0	0	0	1	0	0
YBR083W	TEC1	YDR309C	GIC2	0	0	1	1	0	0
YBR083W	TEC1	YHR005C	GPA1	0	0	1	1	0	0
YBR083W	TEC1	YOR126C	IAH1	0	0	1	0	0	0
YBR083W	TEC1	YLL057C	JLP1	0	0	0	1	0	0
YBR083W	TEC1	YCL055W	KAR4	0	0	1	0	0	0
YBR083W	TEC1	YKR061W	KTR2	0	0	0	1	0	0
YBR083W	TEC1	YNL145W	MFA2	0	0	1	0	0	0
YBR083W	TEC1	YJL186W	MNN5	0	0	1	1	0	0
YBR083W	TEC1	YGR014W	MSB2	0	0	1	1	0	0
YBR083W	TEC1	YPR155C	NCA2	0	0	0	1	0	0
YBR083W	TEC1	YPR075C	OPY2	0	0	0	1	0	0
YBR083W	TEC1	YHR001W	OSH7	0	0	0	1	0	0
YBR083W	TEC1	YNL289W	PCL1	0	0	1	0	0	0
YBR083W	TEC1	YKL127W	PGM1	0	0	0	1	0	0
YBR083W	TEC1	YNL282W	POP3	0	0	0	1	0	0
YBR083W	TEC1	YNL279W	PRM1	0	0	0	1	0	0
YBR083W	TEC1	YLR414C	PUN1	0	0	0	1	0	0
YBR083W	TEC1	YLR084C	RAX2	0	0	1	1	0	0
YBR083W	TEC1	YFL047W	RGD2	0	0	0	1	0	0
YBR083W	TEC1	YIL119C	RPI1	0	0	1	1	0	0
YBR083W	TEC1	YDR041W	RSM10	0	0	0	1	0	0
YBR083W	TEC1	YOR315W	SFG1	0	0	1	1	0	0
YBR083W	TEC1	YJL145W	SFH5	0	0	0	1	0	0
YBR083W	TEC1	YER118C	SHO1	0	0	0	1	0	0
YBR083W	TEC1	YDR522C	SPS2	0	0	0	1	0	0
YBR083W	TEC1	YOR247W	SRL1	0	0	1	1	0	0
YBR083W	TEC1	YKR091W	SRL3	0	0	1	1	0	0
YBR083W	TEC1	YLR452C	SST2	0	0	1	1	0	0
YBR083W	TEC1	YHR084W	STE12	0	0	1	1	0	0
YBR083W	TEC1	YPL057C	SUR1	0	0	1	0	0	0
YBR083W	TEC1	YPL163C	SVS1	0	0	1	1	0	0
YBR083W	TEC1	YJL187C	SWE1	0	0	0	1	0	0
YBR083W	TEC1	YNL087W	TCB2	0	0	0	1	0	0
YBR083W	TEC1	YBR083W	TEC1	0	0	1	1	0	0
YBR083W	TEC1	YGR221C	TOS2	0	0	1	1	0	0
YBR083W	TEC1	YLR212C	TUB4	0	0	0	1	0	0
YBR083W	TEC1	YEL040W	UTR2	0	0	1	1	0	0
YBR083W	TEC1	YDL128W	VCX1	0	0	0	1	0	0
YBR083W	TEC1	YOL105C	WSC3	0	0	0	1	0	0
YBR083W	TEC1	YBL112C	YBL112C	0	0	1	0	0	0
YBR083W	TEC1	YDR210W	YDR210W	0	0	1	0	0	0
YBR083W	TEC1	YGL230C	YGL230C	0	0	0	1	0	0
YBR083W	TEC1	YGR039W	YGR039W	0	0	1	1	0	0
YBR083W	TEC1	YHR125W	YHR125W	0	0	0	1	0	0
YBR083W	TEC1	YKL095W	YJU2	0	0	0	1	0	0
YBR083W	TEC1	YLR413W	YLR413W	0	0	1	1	0	0
YBR083W	TEC1	YLR446W	YLR446W	0	0	0	1	0	0
YBR083W	TEC1	YOR296W	YOR296W	0	0	0	1	0	0
YBR182C	SMP1	YKL185W	ASH1	0	0	0	1	0	0
YBR182C	SMP1	YKL096W	CWP1	0	0	0	1	0	0
YBR182C	SMP1	YMR015C	ERG5	0	0	0	1	0	0
YBR182C	SMP1	YLR300W	EXG1	0	0	0	1	0	0
YBR182C	SMP1	YGL077C	HNM1	0	0	0	1	0	0
YBR182C	SMP1	YKL163W	PIR3	0	0	0	1	0	0
YBR182C	SMP1	YDR351W	SBE2	0	0	0	1	0	0
YBR182C	SMP1	YOR137C	SIA1	0	0	0	1	0	0
YBR182C	SMP1	YHR030C	SLT2	0	0	0	1	0	0
YBR182C	SMP1	YBR182C	SMP1	0	0	0	1	0	0
YBR182C	SMP1	YPL175W	SPT14	0	0	0	1	0	0
YBR182C	SMP1	YCR073C	SSK22	0	0	0	1	0	0
YBR182C	SMP1	YPL176C	TRE1	0	0	0	1	0	0
YBR182C	SMP1	YEL040W	UTR2	0	0	0	1	0	0
YBR239C	ERT1	YNL065W	AQR1	0	0	0	0	0	1
YBR239C	ERT1	YGR244C	LSC2	0	0	0	0	1	0
YBR239C	ERT1	YKL029C	MAE1	0	0	0	0	1	1
YBR239C	ERT1	YKR097W	PCK1	0	0	0	0	1	0
YBR239C	ERT1	YML091C	RPM2	0	0	0	0	1	0
YBR239C	ERT1	YBR105C	VID24	0	0	0	0	1	1
YDL048C	STP4	YJL185C	ATG36	0	0	1	0	0	0
YDL048C	STP4	YIL159W	BNR1	0	0	1	0	0	0
YDL048C	STP4	YCR089W	FIG2	0	0	1	0	0	0
YDL048C	STP4	YPR184W	GDB1	0	0	1	0	0	0
YDL048C	STP4	YMR011W	HXT2	0	0	1	0	0	0
YDL048C	STP4	YOR328W	PDR10	0	0	1	0	0	0
YDL048C	STP4	YHR160C	PEX18	0	0	1	0	0	0
YDL048C	STP4	YOL084W	PHM7	0	0	1	0	0	0
YDL048C	STP4	YBR296C	PHO89	0	0	1	0	0	0
YDL048C	STP4	YIL160C	POT1	0	0	1	0	0	0
YDL048C	STP4	YIL099W	SGA1	0	0	1	0	0	0
YDL048C	STP4	YER011W	TIR1	0	0	1	0	0	0
YDL048C	STP4	YAR029W	YAR029W	0	0	1	0	0	0
YDL048C	STP4	YKL133C	YKL133C	0	0	1	0	0	0
YDL048C	STP4	YMR018W	YMR018W	0	0	1	0	0	0
YDL048C	STP4	YNL193W	YNL193W	0	0	1	0	0	0
YDL048C	STP4	YNL194C	YNL194C	0	0	1	0	0	0
YDL056W	MBP1	YKL112W	ABF1	0	0	1	0	0	0
YDL056W	MBP1	YNR044W	AGA1	0	0	1	0	0	0
YDL056W	MBP1	YBR070C	ALG14	0	0	1	0	0	0
YDL056W	MBP1	YJL115W	ASF1	0	0	1	0	0	0
YDL056W	MBP1	YGR188C	BUB1	0	0	1	0	0	0
YDL056W	MBP1	YOR074C	CDC21	0	0	1	0	0	0
YDL056W	MBP1	YLR103C	CDC45	0	0	1	0	0	0
YDL056W	MBP1	YJL194W	CDC6	0	0	1	0	0	0
YDL056W	MBP1	YDL017W	CDC7	0	0	1	0	0	0
YDL056W	MBP1	YEL061C	CIN8	0	0	0	1	0	0
YDL056W	MBP1	YPR120C	CLB5	0	0	1	1	0	0
YDL056W	MBP1	YGR109C	CLB6	0	0	1	1	0	0
YDL056W	MBP1	YMR199W	CLN1	0	0	1	0	0	0
YDL056W	MBP1	YDR263C	DIN7	0	0	1	1	0	0
YDL056W	MBP1	YER124C	DSE1	0	0	1	0	0	0
YDL056W	MBP1	YDL101C	DUN1	0	0	1	0	0	0
YDL056W	MBP1	YBR078W	ECM33	0	0	1	0	0	0
YDL056W	MBP1	YJL196C	ELO1	0	0	1	0	0	0
YDL056W	MBP1	YLR056W	ERG3	0	0	0	1	0	0
YDL056W	MBP1	YDL018C	ERP3	0	0	1	0	0	0
YDL056W	MBP1	YLR300W	EXG1	0	0	1	0	0	0
YDL056W	MBP1	YMR215W	GAS3	0	0	1	1	0	0
YDL056W	MBP1	YHR061C	GIC1	0	0	1	0	0	0
YDL056W	MBP1	YDR507C	GIN4	0	0	1	0	0	0
YDL056W	MBP1	YML004C	GLO1	0	0	0	1	0	0
YDL056W	MBP1	YNL274C	GOR1	0	0	1	0	0	0
YDL056W	MBP1	YCR065W	HCM1	0	0	1	0	0	0
YDL056W	MBP1	YDR528W	HLR1	0	0	0	1	0	0
YDL056W	MBP1	YBL003C	HTA2	0	0	1	1	0	0
YDL056W	MBP1	YBL002W	HTB2	0	0	1	0	0	0
YDL056W	MBP1	Ho	Ho	0	0	1	0	0	0
YDL056W	MBP1	YFR017C	IGD1	0	0	1	0	0	0
YDL056W	MBP1	YIL026C	IRR1	0	0	1	1	0	0
YDL056W	MBP1	YJL073W	JEM1	0	0	1	0	0	0
YDL056W	MBP1	YDL003W	MCD1	0	0	1	0	0	0
YDL056W	MBP1	YKL150W	MCR1	0	0	1	0	0	0
YDL056W	MBP1	YDR097C	MSH6	0	0	1	0	0	0
YDL056W	MBP1	YJL116C	NCA3	0	0	1	0	0	0
YDL056W	MBP1	YOR372C	NDD1	0	0	0	1	0	0
YDL056W	MBP1	YNR009W	NRM1	0	0	1	0	0	0
YDL056W	MBP1	YOR373W	NUD1	0	0	0	1	0	0
YDL056W	MBP1	YNL289W	PCL1	0	0	1	1	0	0
YDL056W	MBP1	YDR113C	PDS1	0	0	0	1	0	0
YDL056W	MBP1	YMR076C	PDS5	0	0	1	0	0	0
YDL056W	MBP1	YDR501W	PLM2	0	0	1	1	0	0
YDL056W	MBP1	YKL113C	RAD27	0	0	1	0	0	0
YDL056W	MBP1	YER095W	RAD51	0	0	1	0	0	0
YDL056W	MBP1	YNL312W	RFA2	0	0	0	1	0	0
YDL056W	MBP1	YER070W	RNR1	0	0	1	0	0	0
YDL056W	MBP1	YGR180C	RNR4	0	0	1	0	0	0
YDL056W	MBP1	YAR008W	SEN34	0	0	1	0	0	0
YDL056W	MBP1	YHR149C	SKG6	0	0	1	0	0	0
YDL056W	MBP1	YMR179W	SPT21	0	0	1	0	0	0
YDL056W	MBP1	YOR247W	SRL1	0	0	1	0	0	0
YDL056W	MBP1	YJL187C	SWE1	0	0	1	0	0	0
YDL056W	MBP1	YER111C	SWI4	0	0	1	1	0	0
YDL056W	MBP1	YER071C	TDA2	0	0	1	0	0	0
YDL056W	MBP1	YGR221C	TOS2	0	0	1	0	0	0
YDL056W	MBP1	YML100W	TSL1	0	0	0	1	0	0
YDL056W	MBP1	YBR071W	YBR071W	0	0	1	0	0	0
YDL056W	MBP1	YDR115W	YDR115W	0	0	1	0	0	0
YDL056W	MBP1	YER189W	YER189W	0	0	0	1	0	0
YDL056W	MBP1	YDR451C	YHP1	0	0	1	0	0	0
YDL056W	MBP1	YJL045W	YJL045W	0	0	0	1	0	0
YDL056W	MBP1	YJR030C	YJR030C	0	0	1	1	0	0
YDL056W	MBP1	YKL151C	YKL151C	0	0	1	0	0	0
YDL056W	MBP1	YML003W	YML003W	0	0	0	1	0	0
YDL056W	MBP1	YMR144W	YMR144W	0	0	1	0	0	0
YDL056W	MBP1	YML027W	YOX1	0	0	1	0	0	0
YDR034C	LYS14	YJL200C	ACO2	1	1	0	0	0	0
YDR034C	LYS14	YLR153C	ACS2	0	1	0	0	0	0
YDR034C	LYS14	YNR058W	BIO3	0	1	0	0	0	0
YDR034C	LYS14	YNR057C	BIO4	0	1	0	0	0	0
YDR034C	LYS14	YBR291C	CTP1	1	1	0	0	0	0
YDR034C	LYS14	YMR240C	CUS1	0	1	0	0	0	0
YDR034C	LYS14	YIR031C	DAL7	0	1	0	0	0	0
YDR034C	LYS14	YDR148C	KGD2	0	1	0	0	0	0
YDR034C	LYS14	YNL268W	LYP1	0	1	0	0	0	0
YDR034C	LYS14	YIR034C	LYS1	1	1	0	0	0	0
YDR034C	LYS14	YIL094C	LYS12	1	1	0	0	0	0
YDR034C	LYS14	YDR034C	LYS14	1	1	0	0	0	0
YDR034C	LYS14	YBR115C	LYS2	0	1	0	0	0	0
YDR034C	LYS14	YDL182W	LYS20	1	1	0	0	0	0
YDR034C	LYS14	YDL131W	LYS21	1	1	0	0	0	0
YDR034C	LYS14	YDR234W	LYS4	1	1	0	0	0	0
YDR034C	LYS14	YNR050C	LYS9	1	1	0	0	0	0
YDR034C	LYS14	YIL164C	NIT1	1	1	0	0	0	0
YDR034C	LYS14	YOR222W	ODC2	0	1	0	0	0	0
YDR034C	LYS14	YPL112C	PEX25	0	1	0	0	0	0
YDR034C	LYS14	YML107C	PML39	0	1	0	0	0	0
YDR034C	LYS14	YLR142W	PUT1	1	0	0	0	0	0
YDR034C	LYS14	YOR101W	RAS1	0	1	0	0	0	0
YDR034C	LYS14	YBR147W	RTC2	0	1	0	0	0	0
YDR034C	LYS14	YDL183C	YDL183C	0	1	0	0	0	0
YDR034C	LYS14	YDR056C	YDR056C	0	1	0	0	0	0
YDR034C	LYS14	YGR125W	YGR125W	0	1	0	0	0	0
YDR034C	LYS14	YMR241W	YHM2	0	1	0	0	0	0
YDR034C	LYS14	YDR057W	YOS9	0	1	0	0	0	0
YDR043C	NRG1	YKL096W	CWP1	0	0	0	1	0	0
YDR043C	NRG1	YNL111C	CYB5	0	0	0	1	0	0
YDR043C	NRG1	YDR403W	DIT1	0	0	0	1	0	0
YDR043C	NRG1	YDR402C	DIT2	0	0	0	1	0	0
YDR043C	NRG1	YDR040C	ENA1	0	0	0	1	0	0
YDR043C	NRG1	YER044C	ERG28	0	0	0	1	0	0
YDR043C	NRG1	YOR317W	FAA1	0	0	0	1	0	0
YDR043C	NRG1	YIL019W	FAF1	0	0	0	1	0	0
YDR043C	NRG1	YMR319C	FET4	0	0	0	1	0	0
YDR043C	NRG1	YKR102W	FLO10	0	0	0	1	0	0
YDR043C	NRG1	YLR454W	FMP27	0	0	0	1	0	0
YDR043C	NRG1	YNR060W	FRE4	0	0	0	1	0	0
YDR043C	NRG1	YER145C	FTR1	0	0	0	1	0	0
YDR043C	NRG1	YIL020C	HIS6	0	0	0	1	0	0
YDR043C	NRG1	YOR032C	HMS1	0	0	0	1	0	0
YDR043C	NRG1	YER146W	LSM5	0	0	0	1	0	0
YDR043C	NRG1	YER001W	MNN1	0	0	0	1	0	0
YDR043C	NRG1	YDR043C	NRG1	0	0	0	1	0	0
YDR043C	NRG1	YIL114C	POR2	0	0	0	1	0	0
YDR043C	NRG1	YDL090C	RAM1	0	0	0	1	0	0
YDR043C	NRG1	YJL217W	REE1	0	0	0	1	0	0
YDR043C	NRG1	YOR049C	RSB1	0	0	0	1	0	0
YDR043C	NRG1	YIL113W	SDP1	0	0	0	1	0	0
YDR043C	NRG1	YOR140W	SFL1	0	0	0	1	0	0
YDR043C	NRG1	YIL099W	SGA1	0	0	0	1	0	0
YDR043C	NRG1	YER096W	SHC1	0	0	0	1	0	0
YDR043C	NRG1	YDR536W	STL1	0	0	0	1	0	0
YDR043C	NRG1	YER011W	TIR1	0	0	0	1	0	0
YDR043C	NRG1	YGL096W	TOS8	0	0	0	1	0	0
YDR043C	NRG1	YLL028W	TPO1	0	0	0	1	0	0
YDR043C	NRG1	YOR273C	TPO4	0	0	0	1	0	0
YDR043C	NRG1	YPL230W	USV1	0	0	0	1	0	0
YDR043C	NRG1	YEL040W	UTR2	0	0	0	1	0	0
YDR043C	NRG1	YER158C	YER158C	0	0	0	1	0	0
YDR043C	NRG1	YHL041W	YHL041W	0	0	0	1	0	0
YDR043C	NRG1	YLL053C	YLL053C	0	0	0	1	0	0
YDR043C	NRG1	YLR012C	YLR012C	0	0	0	1	0	0
YDR043C	NRG1	YBR183W	YPC1	0	0	0	1	0	0
YDR123C	INO2	YBR029C	CDS1	0	0	1	0	0	0
YDR123C	INO2	YPL231W	FAS2	0	0	1	0	0	0
YDR123C	INO2	YJL153C	INO1	0	0	1	0	0	0
YDR123C	INO2	YDR497C	ITR1	0	0	1	0	0	0
YDR123C	INO2	YGR238C	KEL2	0	0	1	0	0	0
YDR123C	INO2	YDL049C	KNH1	0	0	1	0	0	0
YDR123C	INO2	YJR074W	MOG1	0	0	1	0	0	0
YDR123C	INO2	YNL175C	NOP13	0	0	1	0	0	0
YDR123C	INO2	YHL020C	OPI1	0	0	1	0	0	0
YDR123C	INO2	YJR073C	OPI3	0	0	1	0	0	0
YDR123C	INO2	YNL169C	PSD1	0	0	1	0	0	0
YDR123C	INO2	YER043C	SAH1	0	0	1	0	0	0
YDR146C	SWI5	YPL158C	AIM44	0	0	1	1	0	0
YDR146C	SWI5	YBR158W	AMN1	0	0	1	0	0	0
YDR146C	SWI5	YKL185W	ASH1	0	0	1	1	0	0
YDR146C	SWI5	YNL192W	CHS1	0	0	1	1	0	0
YDR146C	SWI5	YGR189C	CRH1	0	0	0	1	0	0
YDR146C	SWI5	YLR286C	CTS1	0	0	1	0	0	0
YDR146C	SWI5	YDL117W	CYK3	0	0	1	1	0	0
YDR146C	SWI5	YOR264W	DSE3	0	0	0	1	0	0
YDR146C	SWI5	YNL327W	EGT2	0	0	1	1	0	0
YDR146C	SWI5	YLR300W	EXG1	0	0	0	1	0	0
YDR146C	SWI5	YIL009W	FAA3	0	0	1	1	0	0
YDR146C	SWI5	YNL328C	MDJ2	0	0	0	1	0	0
YDR146C	SWI5	YKL186C	MTR2	0	0	0	1	0	0
YDR146C	SWI5	YNL078W	NIS1	0	0	1	1	0	0
YDR146C	SWI5	YDL127W	PCL2	0	0	0	1	0	0
YDR146C	SWI5	YDL179W	PCL9	0	0	1	1	0	0
YDR146C	SWI5	YGR086C	PIL1	0	0	1	1	0	0
YDR146C	SWI5	YKL164C	PIR1	0	0	1	1	0	0
YDR146C	SWI5	YJL078C	PRY3	0	0	1	0	0	0
YDR146C	SWI5	YDR055W	PST1	0	0	1	1	0	0
YDR146C	SWI5	YJL217W	REE1	0	0	1	1	0	0
YDR146C	SWI5	YHR087W	RTC3	0	0	1	0	0	0
YDR146C	SWI5	YLR079W	SIC1	0	0	1	1	0	0
YDR146C	SWI5	YNL032W	SIW14	0	0	0	1	0	0
YDR146C	SWI5	YNL047C	SLM2	0	0	1	0	0	0
YDR146C	SWI5	YBR083W	TEC1	0	0	1	1	0	0
YDR146C	SWI5	YPL157W	TGS1	0	0	1	1	0	0
YDR146C	SWI5	YBR071W	YBR071W	0	0	1	1	0	0
YDR146C	SWI5	YDL119C	YDL119C	0	0	1	1	0	0
YDR146C	SWI5	YLR049C	YLR049C	0	0	1	1	0	0
YDR146C	SWI5	YLR194C	YLR194C	0	0	1	1	0	0
YDR146C	SWI5	YNL046W	YNL046W	0	0	1	0	0	0
YDR207C	UME6	YAL054C	ACS1	0	0	1	0	0	0
YDR207C	UME6	YHR137W	ARO9	0	0	1	0	0	0
YDR207C	UME6	YNL269W	BSC4	0	0	1	0	0	0
YDR207C	UME6	YML042W	CAT2	0	0	1	0	0	0
YDR207C	UME6	YJR161C	COS5	0	0	1	0	0	0
YDR207C	UME6	YPL119C	DBP1	0	0	1	0	0	0
YDR207C	UME6	YKL078W	DHR2	0	0	1	0	0	0
YDR207C	UME6	YER179W	DMC1	0	0	1	0	0	0
YDR207C	UME6	YKR009C	FOX2	0	0	1	0	0	0
YDR207C	UME6	YLR445W	GMC2	0	0	1	0	0	0
YDR207C	UME6	YJL103C	GSM1	0	0	1	0	0	0
YDR207C	UME6	YLR450W	HMG2	0	0	1	0	0	0
YDR207C	UME6	YJR036C	HUL4	0	0	1	0	0	0
YDR207C	UME6	YJL153C	INO1	0	0	1	0	0	0
YDR207C	UME6	YOL101C	IZH4	0	0	1	0	0	0
YDR207C	UME6	YPL121C	MEI5	0	0	1	0	0	0
YDR207C	UME6	YGL183C	MND1	0	0	1	0	0	0
YDR207C	UME6	YKL062W	MSN4	0	0	1	0	0	0
YDR207C	UME6	YOR328W	PDR10	0	0	1	0	0	0
YDR207C	UME6	YGL205W	POX1	0	0	1	0	0	0
YDR207C	UME6	YPL156C	PRM4	0	0	1	0	0	0
YDR207C	UME6	YKL015W	PUT3	0	0	1	0	0	0
YDR207C	UME6	YLR263W	RED1	0	0	1	0	0	0
YDR207C	UME6	YHL024W	RIM4	0	0	1	0	0	0
YDR207C	UME6	YGL250W	RMR1	0	0	1	0	0	0
YDR207C	UME6	YLL046C	RNP1	0	0	1	0	0	0
YDR207C	UME6	YJL089W	SIP4	0	0	1	0	0	0
YDR207C	UME6	YHR014W	SPO13	0	0	1	0	0	0
YDR207C	UME6	YKL086W	SRX1	0	0	1	0	0	0
YDR207C	UME6	YJL083W	TAX4	0	0	1	0	0	0
YDR207C	UME6	YOR352W	TFB6	0	0	1	0	0	0
YDR207C	UME6	YLR183C	TOS4	0	0	1	0	0	0
YDR207C	UME6	YGR019W	UGA1	0	0	1	0	0	0
YDR207C	UME6	YLR373C	VID22	0	0	1	0	0	0
YDR207C	UME6	YGR194C	XKS1	0	0	1	0	0	0
YDR207C	UME6	YBL086C	YBL086C	0	0	1	0	0	0
YDR207C	UME6	YBR184W	YBR184W	0	0	1	0	0	0
YDR207C	UME6	YBR284W	YBR284W	0	0	1	0	0	0
YDR207C	UME6	YCR061W	YCR061W	0	0	1	0	0	0
YDR207C	UME6	YDR042C	YDR042C	0	0	1	0	0	0
YDR207C	UME6	YMR040W	YET2	0	0	1	0	0	0
YDR207C	UME6	YGR053C	YGR053C	0	0	1	0	0	0
YDR207C	UME6	YHR138C	YHR138C	0	0	1	0	0	0
YDR207C	UME6	YLL030C	YLL030C	0	0	1	0	0	0
YDR207C	UME6	YDR285W	ZIP1	0	0	1	0	0	0
YDR216W	ADR1	YMR169C	ALD3	0	0	1	0	0	0
YDR216W	ADR1	YGR088W	CTT1	0	0	1	0	0	0
YDR216W	ADR1	YML128C	MSC1	0	0	1	0	0	0
YDR216W	ADR1	YER150W	SPI1	0	0	1	0	0	0
YDR216W	ADR1	YKL216W	URA1	0	0	1	0	0	0
YDR253C	MET32	YGR204W	ADE3	0	0	0	1	0	0
YDR253C	MET32	YJL060W	BNA3	0	0	0	1	0	0
YDR253C	MET32	YDR256C	CTA1	0	0	0	1	0	0
YDR253C	MET32	YAL012W	CYS3	0	0	0	1	0	0
YDR253C	MET32	YFR030W	MET10	0	0	1	1	0	0
YDR253C	MET32	YKL001C	MET14	0	0	1	0	0	0
YDR253C	MET32	YPR167C	MET16	0	0	1	1	0	0
YDR253C	MET32	YLR303W	MET17	0	0	1	0	0	0
YDR253C	MET32	YNL277W	MET2	0	0	1	1	0	0
YDR253C	MET32	YOL064C	MET22	0	0	0	1	0	0
YDR253C	MET32	YIR017C	MET28	0	0	1	0	0	0
YDR253C	MET32	YJR010W	MET3	0	0	1	0	0	0
YDR253C	MET32	YJR137C	MET5	0	0	1	1	0	0
YDR253C	MET32	YER091C	MET6	0	0	1	0	0	0
YDR253C	MET32	YHL036W	MUP3	0	0	1	0	0	0
YDR253C	MET32	YPR168W	NUT2	0	0	0	1	0	0
YDR253C	MET32	YDL059C	RAD59	0	0	0	1	0	0
YDR253C	MET32	YLR180W	SAM1	0	0	1	0	0	0
YDR253C	MET32	YBR214W	SDS24	0	0	0	1	0	0
YDR253C	MET32	YGL184C	STR3	0	0	1	0	0	0
YDR253C	MET32	YLR092W	SUL2	0	0	1	1	0	0
YDR253C	MET32	YHR117W	TOM71	0	0	0	1	0	0
YDR253C	MET32	YDL058W	USO1	0	0	0	1	0	0
YDR253C	MET32	YLR179C	YLR179C	0	0	1	0	0	0
YDR259C	YAP6	YHR047C	AAP1	0	0	1	1	0	0
YDR259C	YAP6	YER073W	ALD5	0	0	0	1	0	0
YDR259C	YAP6	YPL061W	ALD6	0	0	0	1	0	0
YDR259C	YAP6	YDR441C	APT2	0	0	1	0	0	0
YDR259C	YAP6	YPR192W	AQY1	0	0	1	0	0	0
YDR259C	YAP6	YLL052C	AQY2	0	0	0	1	0	0
YDR259C	YAP6	YML116W	ATR1	0	0	1	1	0	0
YDR259C	YAP6	YOR028C	CIN5	0	0	1	1	0	0
YDR259C	YAP6	YGR108W	CLB1	0	0	0	1	0	0
YDR259C	YAP6	YPR013C	CMR3	0	0	1	0	0	0
YDR259C	YAP6	YIR032C	DAL3	0	0	0	1	0	0
YDR259C	YAP6	YGR060W	ERG25	0	0	0	1	0	0
YDR259C	YAP6	YLR056W	ERG3	0	0	0	1	0	0
YDR259C	YAP6	YIL009W	FAA3	0	0	0	1	0	0
YDR259C	YAP6	YMR319C	FET4	0	0	1	1	0	0
YDR259C	YAP6	YKR102W	FLO10	0	0	1	0	0	0
YDR259C	YAP6	YIR019C	FLO11	0	0	0	1	0	0
YDR259C	YAP6	YOR381W	FRE3	0	0	0	1	0	0
YDR259C	YAP6	YHR049W	FSH1	0	0	1	1	0	0
YDR259C	YAP6	YKR039W	GAP1	0	0	1	1	0	0
YDR259C	YAP6	YMR136W	GAT2	0	0	1	0	0	0
YDR259C	YAP6	YIR013C	GAT4	0	0	1	1	0	0
YDR259C	YAP6	YOL151W	GRE2	0	0	1	0	0	0
YDR259C	YAP6	YKL109W	HAP4	0	0	1	0	0	0
YDR259C	YAP6	YOR032C	HMS1	0	0	0	1	0	0
YDR259C	YAP6	YOL155C	HPF1	0	0	1	0	0	0
YDR259C	YAP6	YEL069C	HXT13	0	0	1	0	0	0
YDR259C	YAP6	YJR158W	HXT16	0	0	1	1	0	0
YDR259C	YAP6	YJL219W	HXT9	0	0	0	1	0	0
YDR259C	YAP6	YBR157C	ICS2	0	0	0	1	0	0
YDR259C	YAP6	YOL157C	IMA2	0	0	1	1	0	0
YDR259C	YAP6	YIL172C	IMA3	0	0	0	1	0	0
YDR259C	YAP6	YJL221C	IMA4	0	0	1	0	0	0
YDR259C	YAP6	YJL216C	IMA5	0	0	1	0	0	0
YDR259C	YAP6	YJR094C	IME1	0	0	0	1	0	0
YDR259C	YAP6	YGR238C	KEL2	0	0	0	1	0	0
YDR259C	YAP6	YNL145W	MFA2	0	0	1	0	0	0
YDR259C	YAP6	YGR249W	MGA1	0	0	0	1	0	0
YDR259C	YAP6	YER028C	MIG3	0	0	0	1	0	0
YDR259C	YAP6	YOR177C	MPC54	0	0	0	1	0	0
YDR259C	YAP6	YOR153W	PDR5	0	0	1	0	0	0
YDR259C	YAP6	YOR161C	PNS1	0	0	0	1	0	0
YDR259C	YAP6	YJL217W	REE1	0	0	1	1	0	0
YDR259C	YAP6	YNL180C	RHO5	0	0	1	1	0	0
YDR259C	YAP6	YLR154C	RNH203	0	0	0	1	0	0
YDR259C	YAP6	YOR049C	RSB1	0	0	1	1	0	0
YDR259C	YAP6	YOR315W	SFG1	0	0	0	1	0	0
YDR259C	YAP6	YDL246C	SOR2	0	0	1	0	0	0
YDR259C	YAP6	YOR247W	SRL1	0	0	0	1	0	0
YDR259C	YAP6	YPR009W	SUT2	0	0	0	1	0	0
YDR259C	YAP6	YNL087W	TCB2	0	0	0	1	0	0
YDR259C	YAP6	YBR067C	TIP1	0	0	0	1	0	0
YDR259C	YAP6	YEL040W	UTR2	0	0	0	1	0	0
YDR259C	YAP6	YIL056W	VHR1	0	0	0	1	0	0
YDR259C	YAP6	YDR259C	YAP6	0	0	0	1	0	0
YDR259C	YAP6	YBL029W	YBL029W	0	0	0	1	0	0
YDR259C	YAP6	YER158C	YER158C	0	0	1	0	0	0
YDR259C	YAP6	YGR234W	YHB1	0	0	1	1	0	0
YDR259C	YAP6	YIR020C	YIR020C	0	0	1	0	0	0
YDR259C	YAP6	YJL218W	YJL218W	0	0	0	1	0	0
YDR259C	YAP6	YLL053C	YLL053C	0	0	1	1	0	0
YDR259C	YAP6	YLR413W	YLR413W	0	0	1	1	0	0
YDR259C	YAP6	YML131W	YML131W	0	0	1	1	0	0
YDR259C	YAP6	YMR320W	YMR320W	0	0	0	1	0	0
YDR259C	YAP6	YOR029W	YOR029W	0	0	1	0	0	0
YDR259C	YAP6	YLR121C	YPS3	0	0	1	0	0	0
YDR259C	YAP6	YOL154W	ZPS1	0	0	1	1	0	0
YDR310C	SUM1	YJR025C	BNA1	0	0	1	0	0	0
YDR310C	SUM1	YJR078W	BNA2	0	0	1	0	0	0
YDR310C	SUM1	YBL098W	BNA4	0	0	1	0	0	0
YDR310C	SUM1	YLR231C	BNA5	0	0	1	0	0	0
YDR310C	SUM1	YFR047C	BNA6	0	0	1	0	0	0
YDR310C	SUM1	YLR308W	CDA2	0	0	1	0	0	0
YDR310C	SUM1	YCR005C	CIT2	0	0	1	0	0	0
YDR310C	SUM1	YIR027C	DAL1	0	0	1	0	0	0
YDR310C	SUM1	YIR028W	DAL4	0	0	1	0	0	0
YDR310C	SUM1	YIR030C	DCG1	0	0	1	0	0	0
YDR310C	SUM1	YFR012W	DCV1	0	0	1	0	0	0
YDR310C	SUM1	YBR201W	DER1	0	0	1	0	0	0
YDR310C	SUM1	YDR403W	DIT1	0	0	1	0	0	0
YDR310C	SUM1	YBR180W	DTR1	0	0	1	0	0	0
YDR310C	SUM1	YBR076W	ECM8	0	0	1	0	0	0
YDR310C	SUM1	YLR343W	GAS2	0	0	1	0	0	0
YDR310C	SUM1	YBR045C	GIP1	0	0	1	0	0	0
YDR310C	SUM1	YGR256W	GND2	0	0	1	0	0	0
YDR310C	SUM1	YOR237W	HES1	0	0	1	0	0	0
YDR310C	SUM1	YDR317W	HIM1	0	0	1	0	0	0
YDR310C	SUM1	YDR533C	HSP31	0	0	1	0	0	0
YDR310C	SUM1	YNL318C	HXT14	0	0	1	0	0	0
YDR310C	SUM1	YJL037W	IRC18	0	0	1	0	0	0
YDR310C	SUM1	YPR139C	LOA1	0	0	1	0	0	0
YDR310C	SUM1	YJL038C	LOH1	0	0	1	0	0	0
YDR310C	SUM1	YIR034C	LYS1	0	0	1	0	0	0
YDR310C	SUM1	YHR015W	MIP6	0	0	1	0	0	0
YDR310C	SUM1	YNL185C	MRPL19	0	0	1	0	0	0
YDR310C	SUM1	YOR071C	NRT1	0	0	1	0	0	0
YDR310C	SUM1	YOR255W	OSW1	0	0	1	0	0	0
YDR310C	SUM1	YEL058W	PCM1	0	0	1	0	0	0
YDR310C	SUM1	YFR023W	PES4	0	0	1	0	0	0
YDR310C	SUM1	YHR185C	PFS1	0	0	1	0	0	0
YDR310C	SUM1	YDR281C	PHM6	0	0	1	0	0	0
YDR310C	SUM1	YIL037C	PRM2	0	0	1	0	0	0
YDR310C	SUM1	YML047C	PRM6	0	0	1	0	0	0
YDR310C	SUM1	YCR045C	RRT12	0	0	1	0	0	0
YDR310C	SUM1	YGL146C	RRT6	0	0	1	0	0	0
YDR310C	SUM1	YPL130W	SPO19	0	0	1	0	0	0
YDR310C	SUM1	YOL091W	SPO21	0	0	1	0	0	0
YDR310C	SUM1	YGL170C	SPO74	0	0	1	0	0	0
YDR310C	SUM1	YLL005C	SPO75	0	0	1	0	0	0
YDR310C	SUM1	YDR218C	SPR28	0	0	1	0	0	0
YDR310C	SUM1	YGR059W	SPR3	0	0	1	0	0	0
YDR310C	SUM1	YDR523C	SPS1	0	0	1	0	0	0
YDR310C	SUM1	YNL202W	SPS19	0	0	1	0	0	0
YDR310C	SUM1	YDR522C	SPS2	0	0	1	0	0	0
YDR310C	SUM1	YCL048W	SPS22	0	0	1	0	0	0
YDR310C	SUM1	YOR313C	SPS4	0	0	1	0	0	0
YDR310C	SUM1	YPL033C	SRL4	0	0	1	0	0	0
YDR310C	SUM1	YHR184W	SSP1	0	0	1	0	0	0
YDR310C	SUM1	YOR242C	SSP2	0	0	1	0	0	0
YDR310C	SUM1	YDR310C	SUM1	0	0	1	0	0	0
YDR310C	SUM1	YOL102C	TPT1	0	0	1	0	0	0
YDR310C	SUM1	YDR185C	UPS3	0	0	1	0	0	0
YDR310C	SUM1	YDL186W	YDL186W	0	0	1	0	0	0
YDR310C	SUM1	YDR042C	YDR042C	0	0	1	0	0	0
YDR310C	SUM1	YDR248C	YDR248C	0	0	1	0	0	0
YDR310C	SUM1	YER085C	YER085C	0	0	1	0	0	0
YDR310C	SUM1	YER187W	YER187W	0	0	1	0	0	0
YDR310C	SUM1	YFL040W	YFL040W	0	0	1	0	0	0
YDR310C	SUM1	YGL015C	YGL015C	0	0	1	0	0	0
YDR310C	SUM1	YGL230C	YGL230C	0	0	1	0	0	0
YDR310C	SUM1	YHL012W	YHL012W	0	0	1	0	0	0
YDR310C	SUM1	YJL043W	YJL043W	0	0	1	0	0	0
YDR310C	SUM1	YJR079W	YJR079W	0	0	1	0	0	0
YDR310C	SUM1	YKR015C	YKR015C	0	0	1	0	0	0
YDR310C	SUM1	YMR244W	YMR244W	0	0	1	0	0	0
YDR310C	SUM1	YNL184C	YNL184C	0	0	1	0	0	0
YDR310C	SUM1	YOL047C	YOL047C	0	0	1	0	0	0
YDR310C	SUM1	YOR214C	YOR214C	0	0	1	0	0	0
YDR310C	SUM1	YPR078C	YPR078C	0	0	1	0	0	0
YDR310C	SUM1	YMR243C	ZRC1	0	0	1	0	0	0
YDR421W	ARO80	YDR380W	ARO10	0	0	1	0	0	0
YDR421W	ARO80	YDR421W	ARO80	0	0	1	1	0	0
YDR421W	ARO80	YHR137W	ARO9	0	0	1	0	0	0
YDR421W	ARO80	YHR139C	SPS100	0	0	0	1	0	0
YDR423C	CAD1	YKL103C	APE1	0	0	1	1	0	0
YDR423C	CAD1	YML116W	ATR1	0	0	0	1	0	0
YDR423C	CAD1	YMR038C	CCS1	0	0	0	1	0	0
YDR423C	CAD1	YKR071C	DRE2	0	0	1	1	0	0
YDR423C	CAD1	YBR047W	FMP23	0	0	0	1	0	0
YDR423C	CAD1	YJL101C	GSH1	0	0	0	1	0	0
YDR423C	CAD1	YLL060C	GTT2	0	0	0	1	0	0
YDR423C	CAD1	YOL119C	MCH4	0	0	0	1	0	0
YDR423C	CAD1	YKR052C	MRS4	0	0	0	1	0	0
YDR423C	CAD1	YKL040C	NFU1	0	0	0	1	0	0
YDR423C	CAD1	YPR048W	TAH18	0	0	0	1	0	0
YDR423C	CAD1	YDR135C	YCF1	0	0	0	1	0	0
YDR423C	CAD1	YDR132C	YDR132C	0	0	0	1	0	0
YDR423C	CAD1	YGR234W	YHB1	0	0	0	1	0	0
YDR423C	CAD1	YLR108C	YLR108C	0	0	0	1	0	0
YDR451C	YHP1	YDR191W	HST4	0	0	1	0	0	0
YDR451C	YHP1	YLR312C	YLR312C	0	0	1	0	0	0
YDR463W	STP1	YCL025C	AGP1	0	0	0	1	0	0
YDR463W	STP1	YBR068C	BAP2	0	0	1	0	0	0
YDR463W	STP1	YDR046C	BAP3	0	0	0	1	0	0
YDR463W	STP1	YLR094C	GIS3	0	0	1	0	0	0
YDR463W	STP1	YDR508C	GNP1	0	0	0	1	0	0
YDR463W	STP1	YML056C	IMD4	0	0	1	0	0	0
YDR463W	STP1	YJL212C	OPT1	0	0	1	0	0	0
YDR463W	STP1	YJL148W	RPA34	0	0	1	0	0	0
YDR463W	STP1	YGR285C	ZUO1	0	0	1	0	0	0
YDR520C	URC2	YHR128W	FUR1	0	0	1	0	0	0
YDR520C	URC2	YKL143W	LTV1	0	0	1	0	0	0
YDR520C	URC2	YER037W	PHM8	0	0	1	0	0	0
YDR520C	URC2	YDR217C	RAD9	0	0	1	0	0	0
YDR520C	URC2	YMR269W	TMA23	0	0	1	0	0	0
YDR520C	URC2	YBR137W	YBR137W	0	0	1	0	0	0
YDR520C	URC2	YLR283W	YLR283W	0	0	1	0	0	0
YEL009C	GCN4	YHR047C	AAP1	0	0	0	0	0	1
YEL009C	GCN4	YLR027C	AAT2	0	0	0	0	1	1
YEL009C	GCN4	YJL200C	ACO2	0	0	0	0	0	1
YEL009C	GCN4	YBR145W	ADH5	0	0	0	0	1	1
YEL009C	GCN4	YIL079C	AIR1	0	0	0	0	0	1
YEL009C	GCN4	YER073W	ALD5	0	0	0	0	1	1
YEL009C	GCN4	YDR242W	AMD2	0	0	0	0	0	1
YEL009C	GCN4	YOL058W	ARG1	0	0	0	0	1	1
YEL009C	GCN4	YJL071W	ARG2	0	0	0	0	0	1
YEL009C	GCN4	YJL088W	ARG3	0	0	0	0	0	1
YEL009C	GCN4	YHR018C	ARG4	0	0	0	0	1	1
YEL009C	GCN4	YMR062C	ARG7	0	0	0	0	1	1
YEL009C	GCN4	YOL140W	ARG8	0	0	0	0	1	1
YEL009C	GCN4	YDR127W	ARO1	0	0	0	0	1	1
YEL009C	GCN4	YGL148W	ARO2	0	0	0	0	0	1
YEL009C	GCN4	YDR035W	ARO3	0	0	0	0	1	1
YEL009C	GCN4	YBR249C	ARO4	0	0	0	0	1	1
YEL009C	GCN4	YGL202W	ARO8	0	0	0	0	0	1
YEL009C	GCN4	YPR145W	ASN1	0	0	0	0	1	1
YEL009C	GCN4	YGR124W	ASN2	0	0	0	0	0	1
YEL009C	GCN4	YML116W	ATR1	0	0	0	0	0	1
YEL009C	GCN4	YBR068C	BAP2	0	0	0	0	0	1
YEL009C	GCN4	YKR099W	BAS1	0	0	0	0	0	1
YEL009C	GCN4	YHR208W	BAT1	0	0	0	0	0	1
YEL009C	GCN4	YJR025C	BNA1	0	0	0	0	1	1
YEL009C	GCN4	YNR069C	BSC5	0	0	0	0	0	1
YEL009C	GCN4	YDR531W	CAB1	0	0	0	0	0	1
YEL009C	GCN4	YFL028C	CAF16	0	0	0	0	0	1
YEL009C	GCN4	YEL063C	CAN1	0	0	0	0	1	0
YEL009C	GCN4	YPL111W	CAR1	0	0	0	0	1	0
YEL009C	GCN4	YHR122W	CIA2	0	0	0	0	0	1
YEL009C	GCN4	YGR110W	CLD1	0	0	0	0	0	1
YEL009C	GCN4	YOR303W	CPA1	0	0	0	0	0	1
YEL009C	GCN4	YJR109C	CPA2	0	0	0	0	1	1
YEL009C	GCN4	YPR111W	DBF20	0	0	0	0	0	1
YEL009C	GCN4	YLL018C	DPS1	0	0	0	0	0	1
YEL009C	GCN4	YHL016C	DUR3	0	0	0	0	0	1
YEL009C	GCN4	YBL043W	ECM13	0	0	0	0	1	1
YEL009C	GCN4	YBR047W	FMP23	0	0	0	0	1	1
YEL009C	GCN4	YGR267C	FOL2	0	0	0	0	0	1
YEL009C	GCN4	YDL198C	GGC1	0	0	0	0	1	1
YEL009C	GCN4	YER040W	GLN3	0	0	0	0	0	1
YEL009C	GCN4	YEL046C	GLY1	0	0	0	0	0	1
YEL009C	GCN4	YGR154C	GTO1	0	0	0	0	0	1
YEL009C	GCN4	YNL030W	HHF2	0	0	0	0	0	1
YEL009C	GCN4	YER055C	HIS1	0	0	0	0	0	1
YEL009C	GCN4	YOR202W	HIS3	0	0	0	0	0	1
YEL009C	GCN4	YCL030C	HIS4	0	0	0	0	1	1
YEL009C	GCN4	YIL116W	HIS5	0	0	0	0	1	1
YEL009C	GCN4	YBR248C	HIS7	0	0	0	0	0	1
YEL009C	GCN4	YDR158W	HOM2	0	0	0	0	1	1
YEL009C	GCN4	YER052C	HOM3	0	0	0	0	1	1
YEL009C	GCN4	YNL004W	HRB1	0	0	0	0	0	1
YEL009C	GCN4	YDR258C	HSP78	0	0	0	0	0	1
YEL009C	GCN4	YER065C	ICL1	0	0	0	0	0	1
YEL009C	GCN4	YMR195W	ICY1	0	0	0	0	1	1
YEL009C	GCN4	YPL250C	ICY2	0	0	0	0	1	1
YEL009C	GCN4	YDL066W	IDP1	0	0	0	0	0	1
YEL009C	GCN4	YMR108W	ILV2	0	0	0	0	1	1
YEL009C	GCN4	YJR016C	ILV3	0	0	0	0	1	1
YEL009C	GCN4	YLR355C	ILV5	0	0	0	0	1	1
YEL009C	GCN4	YCL009C	ILV6	0	0	0	0	1	1
YEL009C	GCN4	YHR046C	INM1	0	0	0	0	0	1
YEL009C	GCN4	YLL027W	ISA1	0	0	0	0	0	1
YEL009C	GCN4	YPL135W	ISU1	0	0	0	0	1	1
YEL009C	GCN4	YLR451W	LEU3	0	0	0	0	0	1
YEL009C	GCN4	YNL104C	LEU4	0	0	0	0	1	1
YEL009C	GCN4	YOR108W	LEU9	0	0	0	0	1	1
YEL009C	GCN4	YIR034C	LYS1	0	0	0	0	1	1
YEL009C	GCN4	YBR115C	LYS2	0	0	0	0	0	1
YEL009C	GCN4	YDL182W	LYS20	0	0	0	0	0	1
YEL009C	GCN4	YDL131W	LYS21	0	0	0	0	0	1
YEL009C	GCN4	YDR234W	LYS4	0	0	0	0	0	1
YEL009C	GCN4	YNR050C	LYS9	0	0	0	0	0	1
YEL009C	GCN4	YKL029C	MAE1	0	0	0	0	1	1
YEL009C	GCN4	YDL054C	MCH1	0	0	0	0	1	1
YEL009C	GCN4	YOL119C	MCH4	0	0	0	0	1	1
YEL009C	GCN4	YOR221C	MCT1	0	0	0	0	0	1
YEL009C	GCN4	YOL027C	MDM38	0	0	0	0	0	1
YEL009C	GCN4	YGL125W	MET13	0	0	0	0	0	1
YEL009C	GCN4	YPR167C	MET16	0	0	0	0	0	1
YEL009C	GCN4	YOL064C	MET22	0	0	0	0	1	1
YEL009C	GCN4	YIR017C	MET28	0	0	0	0	0	1
YEL009C	GCN4	YJR137C	MET5	0	0	0	0	0	1
YEL009C	GCN4	YER091C	MET6	0	0	0	0	1	0
YEL009C	GCN4	YJR008W	MHO1	0	0	0	0	0	1
YEL009C	GCN4	YHR162W	MPC2	0	0	0	0	1	1
YEL009C	GCN4	YOR201C	MRM1	0	0	0	0	0	1
YEL009C	GCN4	YNL240C	NAR1	0	0	0	0	0	1
YEL009C	GCN4	YPR149W	NCE102	0	0	0	0	1	0
YEL009C	GCN4	YNL036W	NCE103	0	0	0	0	0	1
YEL009C	GCN4	YIL164C	NIT1	0	0	0	0	0	1
YEL009C	GCN4	YNL129W	NRK1	0	0	0	0	0	1
YEL009C	GCN4	YKL120W	OAC1	0	0	0	0	0	1
YEL009C	GCN4	YOR222W	ODC2	0	0	0	0	0	1
YEL009C	GCN4	YOR130C	ORT1	0	0	0	0	1	1
YEL009C	GCN4	YHR071W	PCL5	0	0	0	0	1	1
YEL009C	GCN4	YBR035C	PDX3	0	0	0	0	0	1
YEL009C	GCN4	YGR239C	PEX21	0	0	0	0	0	1
YEL009C	GCN4	YGL059W	PKP2	0	0	0	0	1	1
YEL009C	GCN4	YNL221C	POP1	0	0	0	0	0	1
YEL009C	GCN4	YPL188W	POS5	0	0	0	0	0	1
YEL009C	GCN4	YOR323C	PRO2	0	0	0	0	0	1
YEL009C	GCN4	YJL072C	PSF2	0	0	0	0	0	1
YEL009C	GCN4	YER089C	PTC2	0	0	0	0	0	1
YEL009C	GCN4	YPL212C	PUS1	0	0	0	0	0	1
YEL009C	GCN4	YKL015W	PUT3	0	0	0	0	0	1
YEL009C	GCN4	YBR218C	PYC2	0	0	0	0	0	1
YEL009C	GCN4	YBR043C	QDR3	0	0	0	0	0	1
YEL009C	GCN4	YDR076W	RAD55	0	0	0	0	0	1
YEL009C	GCN4	YNL180C	RHO5	0	0	0	0	1	0
YEL009C	GCN4	YDR487C	RIB3	0	0	0	0	1	0
YEL009C	GCN4	YBR256C	RIB5	0	0	0	0	0	1
YEL009C	GCN4	YMR063W	RIM9	0	0	0	0	0	1
YEL009C	GCN4	YBR147W	RTC2	0	0	0	0	1	1
YEL009C	GCN4	YDL025C	RTK1	0	0	0	0	1	1
YEL009C	GCN4	YGR161C	RTS3	0	0	0	0	1	1
YEL009C	GCN4	YPL273W	SAM4	0	0	0	0	0	1
YEL009C	GCN4	YGL224C	SDT1	0	0	0	0	0	1
YEL009C	GCN4	YOR184W	SER1	0	0	0	0	0	1
YEL009C	GCN4	YGL066W	SGF73	0	0	0	0	0	1
YEL009C	GCN4	YJL089W	SIP4	0	0	0	0	0	1
YEL009C	GCN4	YNL311C	SKP2	0	0	0	0	0	1
YEL009C	GCN4	YDR011W	SNQ2	0	0	0	0	0	1
YEL009C	GCN4	YMR096W	SNZ1	0	0	0	0	1	1
YEL009C	GCN4	YJR104C	SOD1	0	0	0	0	0	1
YEL009C	GCN4	YPL092W	SSU1	0	0	0	0	0	1
YEL009C	GCN4	YMR019W	STB4	0	0	0	0	0	1
YEL009C	GCN4	YKL072W	STB6	0	0	0	0	0	1
YEL009C	GCN4	YJR130C	STR2	0	0	0	0	0	1
YEL009C	GCN4	YGL184C	STR3	0	0	0	0	0	1
YEL009C	GCN4	YBR294W	SUL1	0	0	0	0	0	1
YEL009C	GCN4	YOR337W	TEA1	0	0	0	0	0	1
YEL009C	GCN4	YCR053W	THR4	0	0	0	0	0	1
YEL009C	GCN4	YIL078W	THS1	0	0	0	0	0	1
YEL009C	GCN4	YIL022W	TIM44	0	0	0	0	0	1
YEL009C	GCN4	YER175C	TMT1	0	0	0	0	1	1
YEL009C	GCN4	YER090W	TRP2	0	0	0	0	0	1
YEL009C	GCN4	YKL211C	TRP3	0	0	0	0	0	1
YEL009C	GCN4	YDR354W	TRP4	0	0	0	0	0	1
YEL009C	GCN4	YGL026C	TRP5	0	0	0	0	0	1
YEL009C	GCN4	YDL170W	UGA3	0	0	0	0	1	1
YEL009C	GCN4	YIL056W	VHR1	0	0	0	0	1	0
YEL009C	GCN4	YGR065C	VHT1	0	0	0	0	0	1
YEL009C	GCN4	YPL252C	YAH1	0	0	0	0	0	1
YEL009C	GCN4	YER024W	YAT2	0	0	0	0	0	1
YEL009C	GCN4	YDR222W	YDR222W	0	0	0	0	0	1
YEL009C	GCN4	YDR341C	YDR341C	0	0	0	0	0	1
YEL009C	GCN4	YGL117W	YGL117W	0	0	0	0	1	1
YEL009C	GCN4	YHR029C	YHI9	0	0	0	0	0	1
YEL009C	GCN4	YHR020W	YHR020W	0	0	0	0	0	1
YEL009C	GCN4	YJR154W	YJR154W	0	0	0	0	0	1
YEL009C	GCN4	YKL023W	YKL023W	0	0	0	0	0	1
YEL009C	GCN4	YKL033W-A	YKL033W-A	0	0	0	0	0	1
YEL009C	GCN4	YLR152C	YLR152C	0	0	0	0	0	1
YEL009C	GCN4	YLR290C	YLR290C	0	0	0	0	0	1
YEL009C	GCN4	YPR058W	YMC1	0	0	0	0	0	1
YEL009C	GCN4	YBR104W	YMC2	0	0	0	0	0	1
YEL009C	GCN4	YFR049W	YMR31	0	0	0	0	0	1
YEL009C	GCN4	YPL264C	YPL264C	0	0	0	0	1	1
YEL009C	GCN4	YBR046C	ZTA1	0	0	0	0	0	1
YER028C	MIG3	YEL070W	DSF1	0	0	0	1	0	0
YER028C	MIG3	YDR040C	ENA1	0	0	0	1	0	0
YER028C	MIG3	YAR050W	FLO1	0	0	0	1	0	0
YER028C	MIG3	YJR158W	HXT16	0	0	0	1	0	0
YER028C	MIG3	YDR343C	HXT6	0	0	0	1	0	0
YER028C	MIG3	YJL221C	IMA4	0	0	0	1	0	0
YER028C	MIG3	YGR289C	MAL11	0	0	0	1	0	0
YER028C	MIG3	YBR298C	MAL31	0	0	0	1	0	0
YER028C	MIG3	YDL214C	PRR2	0	0	0	1	0	0
YER028C	MIG3	YJR159W	SOR1	0	0	0	1	0	0
YER028C	MIG3	YHR033W	YHR033W	0	0	0	1	0	0
YER040W	GLN3	YPR145W	ASN1	0	0	1	1	0	0
YER040W	GLN3	YPR035W	GLN1	0	0	1	1	0	0
YER040W	GLN3	YDL171C	GLT1	0	0	0	1	0	0
YER040W	GLN3	YFR023W	PES4	0	0	1	0	0	0
YER040W	GLN3	YDR523C	SPS1	0	0	1	0	0	0
YER040W	GLN3	YDL170W	UGA3	0	0	0	1	0	0
YER088C	DOT6	YJL088W	ARG3	0	0	1	0	0	0
YER088C	DOT6	YCR005C	CIT2	0	0	1	0	0	0
YER088C	DOT6	YER145C	FTR1	0	0	1	0	0	0
YER088C	DOT6	YHR071W	PCL5	0	0	1	0	0	0
YER088C	DOT6	YBL054W	TOD6	0	0	1	0	0	0
YER088C	DOT6	YGR234W	YHB1	0	0	1	0	0	0
YER111C	SWI4	YNR044W	AGA1	0	0	1	1	0	0
YER111C	SWI4	YBR070C	ALG14	0	0	1	1	0	0
YER111C	SWI4	YJR148W	BAT2	0	0	1	1	0	0
YER111C	SWI4	YER177W	BMH1	0	0	0	1	0	0
YER111C	SWI4	YKL007W	CAP1	0	0	1	0	0	0
YER111C	SWI4	YGR140W	CBF2	0	0	1	0	0	0
YER111C	SWI4	YJL194W	CDC6	0	0	1	1	0	0
YER111C	SWI4	YJL158C	CIS3	0	0	1	0	0	0
YER111C	SWI4	YNL298W	CLA4	0	0	0	1	0	0
YER111C	SWI4	YGR109C	CLB6	0	0	1	0	0	0
YER111C	SWI4	YMR199W	CLN1	0	0	1	0	0	0
YER111C	SWI4	YKL096W	CWP1	0	0	1	0	0	0
YER111C	SWI4	YBR112C	CYC8	0	0	1	0	0	0
YER111C	SWI4	YBR078W	ECM33	0	0	1	0	0	0
YER111C	SWI4	YJL196C	ELO1	0	0	1	1	0	0
YER111C	SWI4	YLR056W	ERG3	0	0	0	1	0	0
YER111C	SWI4	YLR300W	EXG1	0	0	1	1	0	0
YER111C	SWI4	YDR261C	EXG2	0	0	1	0	0	0
YER111C	SWI4	YMR306W	FKS3	0	0	0	1	0	0
YER111C	SWI4	YMR136W	GAT2	0	0	1	0	0	0
YER111C	SWI4	YHR061C	GIC1	0	0	1	0	0	0
YER111C	SWI4	YDR309C	GIC2	0	0	1	0	0	0
YER111C	SWI4	YDR507C	GIN4	0	0	1	1	0	0
YER111C	SWI4	YDR513W	GRX2	0	0	1	0	0	0
YER111C	SWI4	YEL017W	GTT3	0	0	1	0	0	0
YER111C	SWI4	YLR256W	HAP1	0	0	1	0	0	0
YER111C	SWI4	YCR065W	HCM1	0	0	1	1	0	0
YER111C	SWI4	YBR009C	HHF1	0	0	1	0	0	0
YER111C	SWI4	YPL127C	HHO1	0	0	1	0	0	0
YER111C	SWI4	YBR010W	HHT1	0	0	1	0	0	0
YER111C	SWI4	YDR225W	HTA1	0	0	0	1	0	0
YER111C	SWI4	YDR224C	HTB1	0	0	1	0	0	0
YER111C	SWI4	YBL002W	HTB2	0	0	1	0	0	0
YER111C	SWI4	YOL012C	HTZ1	0	0	1	0	0	0
YER111C	SWI4	YGL253W	HXK2	0	0	1	0	0	0
YER111C	SWI4	Ho	Ho	0	0	1	0	0	0
YER111C	SWI4	YFR017C	IGD1	0	0	1	1	0	0
YER111C	SWI4	YKL008C	LAC1	0	0	1	0	0	0
YER111C	SWI4	YER112W	LSM4	0	0	0	1	0	0
YER111C	SWI4	YDL003W	MCD1	0	0	1	0	0	0
YER111C	SWI4	YER001W	MNN1	0	0	1	0	0	0
YER111C	SWI4	YMR070W	MOT3	0	0	1	0	0	0
YER111C	SWI4	YGR014W	MSB2	0	0	1	0	0	0
YER111C	SWI4	YPR149W	NCE102	0	0	1	0	0	0
YER111C	SWI4	YMR145C	NDE1	0	0	1	0	0	0
YER111C	SWI4	YNL289W	PCL1	0	0	1	0	0	0
YER111C	SWI4	YDL127W	PCL2	0	0	0	1	0	0
YER111C	SWI4	YIL013C	PDR11	0	0	1	0	0	0
YER111C	SWI4	YNL231C	PDR16	0	0	0	1	0	0
YER111C	SWI4	YHR150W	PEX28	0	0	0	1	0	0
YER111C	SWI4	YMR006C	PLB2	0	0	1	0	0	0
YER111C	SWI4	YDR501W	PLM2	0	0	1	1	0	0
YER111C	SWI4	YDR452W	PPN1	0	0	0	1	0	0
YER111C	SWI4	YKR013W	PRY2	0	0	1	0	0	0
YER111C	SWI4	YDL055C	PSA1	0	0	1	0	0	0
YER111C	SWI4	YLR142W	PUT1	0	0	1	0	0	0
YER111C	SWI4	YPL024W	RMI1	0	0	0	1	0	0
YER111C	SWI4	YER070W	RNR1	0	0	1	1	0	0
YER111C	SWI4	YGR180C	RNR4	0	0	1	0	0	0
YER111C	SWI4	YNL178W	RPS3	0	0	1	0	0	0
YER111C	SWI4	YGR152C	RSR1	0	0	1	0	0	0
YER111C	SWI4	YOR315W	SFG1	0	0	1	1	0	0
YER111C	SWI4	YHR149C	SKG6	0	0	1	1	0	0
YER111C	SWI4	YDR073W	SNF11	0	0	1	0	0	0
YER111C	SWI4	YPL124W	SPC29	0	0	1	0	0	0
YER111C	SWI4	YMR179W	SPT21	0	0	1	1	0	0
YER111C	SWI4	YLR055C	SPT8	0	0	0	1	0	0
YER111C	SWI4	YOR247W	SRL1	0	0	1	0	0	0
YER111C	SWI4	YML052W	SUR7	0	0	1	0	0	0
YER111C	SWI4	YPL163C	SVS1	0	0	1	0	0	0
YER111C	SWI4	YJL187C	SWE1	0	0	1	0	0	0
YER111C	SWI4	YPL016W	SWI1	0	0	1	0	0	0
YER111C	SWI4	YER111C	SWI4	0	0	1	0	0	0
YER111C	SWI4	YBR162C	TOS1	0	0	1	1	0	0
YER111C	SWI4	YGR221C	TOS2	0	0	1	0	0	0
YER111C	SWI4	YNL300W	TOS6	0	0	1	1	0	0
YER111C	SWI4	YDR453C	TSA2	0	0	1	0	0	0
YER111C	SWI4	YML100W	TSL1	0	0	0	1	0	0
YER111C	SWI4	YOR344C	TYE7	0	0	1	0	0	0
YER111C	SWI4	YKR042W	UTH1	0	0	1	0	0	0
YER111C	SWI4	YEL040W	UTR2	0	0	0	1	0	0
YER111C	SWI4	YIL056W	VHR1	0	0	1	0	0	0
YER111C	SWI4	YBR071W	YBR071W	0	0	1	1	0	0
YER111C	SWI4	YGR153W	YGR153W	0	0	1	0	0	0
YER111C	SWI4	YDR451C	YHP1	0	0	1	0	0	0
YER111C	SWI4	YMR144W	YMR144W	0	0	1	0	0	0
YER111C	SWI4	YOL019W	YOL019W	0	0	1	0	0	0
YER111C	SWI4	YML027W	YOX1	0	0	1	0	0	0
YER111C	SWI4	YLR121C	YPS3	0	0	1	0	0	0
YER169W	RPH1	YBR033W	EDS1	0	0	1	0	0	0
YER169W	RPH1	YBR126C	TPS1	0	0	1	0	0	0
YFL021W	GAT1	YBR268W	MRPL37	0	0	0	1	0	0
YFL021W	GAT1	YHR179W	OYE2	0	0	0	1	0	0
YFL021W	GAT1	YJL210W	PEX2	0	0	0	1	0	0
YFL031W	HAC1	YOR198C	BFR1	0	0	0	1	0	0
YFL031W	HAC1	YHR044C	DOG1	0	0	0	1	0	0
YFL031W	HAC1	YHR043C	DOG2	0	0	0	1	0	0
YFL031W	HAC1	YBR180W	DTR1	0	0	0	1	0	0
YFL031W	HAC1	YFR041C	ERJ5	0	0	0	1	0	0
YFL031W	HAC1	YML130C	ERO1	0	0	0	1	0	0
YFL031W	HAC1	YAL007C	ERP2	0	0	0	1	0	0
YFL031W	HAC1	YDR518W	EUG1	0	0	0	1	0	0
YFL031W	HAC1	YJL091C	GWT1	0	0	0	1	0	0
YFL031W	HAC1	YDR540C	IRC4	0	0	0	1	0	0
YFL031W	HAC1	YJL073W	JEM1	0	0	0	1	0	0
YFL031W	HAC1	YJL034W	KAR2	0	0	0	1	0	0
YFL031W	HAC1	YOR099W	KTR1	0	0	0	1	0	0
YFL031W	HAC1	YKL073W	LHS1	0	0	0	1	0	0
YFL031W	HAC1	YDR503C	LPP1	0	0	0	1	0	0
YFL031W	HAC1	YKL165C	MCD4	0	0	0	1	0	0
YFL031W	HAC1	YCL044C	MGR1	0	0	0	1	0	0
YFL031W	HAC1	YNL249C	MPA43	0	0	0	1	0	0
YFL031W	HAC1	YKL074C	MUD2	0	0	0	1	0	0
YFL031W	HAC1	YGL126W	SCS3	0	0	0	1	0	0
YFL031W	HAC1	YOL031C	SIL1	0	0	0	1	0	0
YFL031W	HAC1	YJL035C	TAD2	0	0	0	1	0	0
YFL031W	HAC1	YFR026C	ULI1	0	0	0	1	0	0
YFL031W	HAC1	YDR400W	URH1	0	0	0	1	0	0
YFL031W	HAC1	YMR040W	YET2	0	0	0	1	0	0
YGL035C	MIG1	YDR441C	APT2	0	0	1	0	0	0
YGL035C	MIG1	YEL069C	HXT13	0	0	1	0	0	0
YGL035C	MIG1	YJL219W	HXT9	0	0	1	0	0	0
YGL035C	MIG1	YJL216C	IMA5	0	0	1	0	0	0
YGL035C	MIG1	YCR073C	SSK22	0	0	1	0	0	0
YGL071W	AFT1	YGL071W	AFT1	0	0	1	1	0	0
YGL071W	AFT1	YDR264C	AKR1	0	0	0	1	0	0
YGL071W	AFT1	YHL040C	ARN1	0	0	1	1	0	0
YGL071W	AFT1	YHL047C	ARN2	0	0	0	1	0	0
YGL071W	AFT1	YHR171W	ATG7	0	0	1	0	0	0
YGL071W	AFT1	YDR270W	CCC2	0	0	0	1	0	0
YGL071W	AFT1	YDR151C	CTH1	0	0	1	0	0	0
YGL071W	AFT1	YLR214W	FRE1	0	0	0	1	0	0
YGL071W	AFT1	YLL051C	FRE6	0	0	0	1	0	0
YGL071W	AFT1	YER145C	FTR1	0	0	0	1	0	0
YGL071W	AFT1	YJL094C	KHA1	0	0	0	1	0	0
YGL071W	AFT1	YER146W	LSM5	0	0	0	1	0	0
YGL071W	AFT1	YDR265W	PEX10	0	0	0	1	0	0
YGL071W	AFT1	YLR137W	RKM5	0	0	1	0	0	0
YGL071W	AFT1	RPL22a	RPL22a	0	0	1	0	0	0
YGL071W	AFT1	YOR137C	SIA1	0	0	0	1	0	0
YGL071W	AFT1	YLR136C	TIS11	0	0	1	1	0	0
YGL071W	AFT1	YDR541C	YDR541C	0	0	1	0	0	0
YGL071W	AFT1	YHR138C	YHR138C	0	0	1	0	0	0
YGL162W	SUT1	YDR216W	ADR1	0	0	0	0	1	0
YGL162W	SUT1	YPR192W	AQY1	0	0	0	1	0	0
YGL162W	SUT1	YDL037C	BSC1	0	0	0	1	0	0
YGL162W	SUT1	YOR349W	CIN1	0	0	0	1	0	0
YGL162W	SUT1	YPR013C	CMR3	0	0	0	1	0	0
YGL162W	SUT1	YDR256C	CTA1	0	0	0	1	0	0
YGL162W	SUT1	YKL096W	CWP1	0	0	0	1	0	0
YGL162W	SUT1	YPL265W	DIP5	0	0	0	1	0	0
YGL162W	SUT1	YBL043W	ECM13	0	0	0	1	1	0
YGL162W	SUT1	YLR377C	FBP1	0	0	0	0	1	0
YGL162W	SUT1	YMR136W	GAT2	0	0	0	1	0	0
YGL162W	SUT1	YOR375C	GDH1	0	0	0	0	1	0
YGL162W	SUT1	YDR309C	GIC2	0	0	0	1	0	0
YGL162W	SUT1	YDR096W	GIS1	0	0	0	1	0	0
YGL162W	SUT1	YCR098C	GIT1	0	0	0	1	0	0
YGL162W	SUT1	YDR508C	GNP1	0	0	0	1	0	0
YGL162W	SUT1	YKL109W	HAP4	0	0	0	1	1	0
YGL162W	SUT1	YOL156W	HXT11	0	0	0	1	0	0
YGL162W	SUT1	YEL069C	HXT13	0	0	0	0	1	0
YGL162W	SUT1	YJR158W	HXT16	0	0	0	1	0	0
YGL162W	SUT1	YMR011W	HXT2	0	0	0	1	0	0
YGL162W	SUT1	YDR343C	HXT6	0	0	0	1	1	0
YGL162W	SUT1	YBR157C	ICS2	0	0	0	1	0	0
YGL162W	SUT1	YGR287C	IMA1	0	0	0	0	1	0
YGL162W	SUT1	YJR119C	JHD2	0	0	0	1	0	0
YGL162W	SUT1	YPL056C	LCL1	0	0	0	1	0	0
YGL162W	SUT1	YOL126C	MDH2	0	0	0	1	0	0
YGL162W	SUT1	YOR211C	MGM1	0	0	0	1	0	0
YGL162W	SUT1	MIC14	MIC14	0	0	0	1	0	0
YGL162W	SUT1	YLR332W	MID2	0	0	0	1	0	0
YGL162W	SUT1	YER028C	MIG3	0	0	0	1	0	0
YGL162W	SUT1	YPR047W	MSF1	0	0	0	1	0	0
YGL162W	SUT1	YOR153W	PDR5	0	0	0	1	0	0
YGL162W	SUT1	YOL084W	PHM7	0	0	0	1	0	0
YGL162W	SUT1	YML123C	PHO84	0	0	0	1	0	0
YGL162W	SUT1	YIL122W	POG1	0	0	0	1	0	0
YGL162W	SUT1	YPL156C	PRM4	0	0	0	1	0	0
YGL162W	SUT1	YIL117C	PRM5	0	0	0	0	1	0
YGL162W	SUT1	YDL214C	PRR2	0	0	0	1	1	0
YGL162W	SUT1	YIL120W	QDR1	0	0	0	1	0	0
YGL162W	SUT1	YDR030C	RAD28	0	0	0	1	0	0
YGL162W	SUT1	YOR049C	RSB1	0	0	0	1	0	0
YGL162W	SUT1	YJL105W	SET4	0	0	0	1	0	0
YGL162W	SUT1	YOR315W	SFG1	0	0	0	1	0	0
YGL162W	SUT1	YIL099W	SGA1	0	0	0	1	0	0
YGL162W	SUT1	YMR016C	SOK2	0	0	0	1	0	0
YGL162W	SUT1	YHR136C	SPL2	0	0	0	1	0	0
YGL162W	SUT1	YLR341W	SPO77	0	0	0	1	0	0
YGL162W	SUT1	YOR212W	STE4	0	0	0	1	0	0
YGL162W	SUT1	YDL048C	STP4	0	0	0	1	0	0
YGL162W	SUT1	YGL162W	SUT1	0	0	0	1	1	0
YGL162W	SUT1	YPR009W	SUT2	0	0	0	1	0	0
YGL162W	SUT1	YAL064W	YAL064W	0	0	0	1	0	0
YGL162W	SUT1	YBR032W	YBR032W	0	0	0	1	0	0
YGL162W	SUT1	YDR090C	YDR090C	0	0	0	1	0	0
YGL162W	SUT1	YGL039W	YGL039W	0	0	0	1	0	0
YGL162W	SUT1	YGR035C	YGR035C	0	0	0	1	0	0
YGL162W	SUT1	YGR273C	YGR273C	0	0	0	1	0	0
YGL162W	SUT1	YHR125W	YHR125W	0	0	0	1	0	0
YGL162W	SUT1	YJL218W	YJL218W	0	0	0	1	0	0
YGL162W	SUT1	YKR041W	YKR041W	0	0	0	1	0	0
YGL162W	SUT1	YLR297W	YLR297W	0	0	0	1	0	0
YGL162W	SUT1	YLR413W	YLR413W	0	0	0	1	0	0
YGL162W	SUT1	YMR210W	YMR210W	0	0	0	1	0	0
YGL162W	SUT1	YNL144C	YNL144C	0	0	0	1	0	0
YGL162W	SUT1	YOR062C	YOR062C	0	0	0	1	0	0
YGL162W	SUT1	YBR183W	YPC1	0	0	0	1	0	0
YGL181W	GTS1	YDR525W	API2	0	0	0	1	0	0
YGL181W	GTS1	YNR069C	BSC5	0	0	0	1	0	0
YGL181W	GTS1	YLR013W	GAT3	0	0	0	1	0	0
YGL181W	GTS1	YGL251C	HFM1	0	0	0	1	0	0
YGL181W	GTS1	YDL245C	HXT15	0	0	0	1	0	0
YGL181W	GTS1	YOR255W	OSW1	0	0	0	1	0	0
YGL181W	GTS1	YFR023W	PES4	0	0	0	1	0	0
YGL181W	GTS1	YAL018C	YAL018C	0	0	0	1	0	0
YGL181W	GTS1	YFL012W	YFL012W	0	0	0	1	0	0
YGL181W	GTS1	YGL149W	YGL149W	0	0	0	1	0	0
YGL181W	GTS1	YGR066C	YGR066C	0	0	0	1	0	0
YGL181W	GTS1	YPR027C	YPR027C	0	0	0	1	0	0
YGL237C	HAP2	YDR377W	ATP17	0	0	1	0	0	0
YGL237C	HAP2	YBR039W	ATP3	0	0	1	0	0	0
YGL237C	HAP2	YLR220W	CCC1	0	0	1	0	0	0
YGL237C	HAP2	YGL187C	COX4	0	0	1	0	0	0
YGL237C	HAP2	YHR051W	COX6	0	0	1	0	0	0
YGL237C	HAP2	YJR077C	MIR1	0	0	1	0	0	0
YGL237C	HAP2	YGR084C	MRP13	0	0	1	0	0	0
YGL237C	HAP2	YML120C	NDI1	0	0	1	0	0	0
YGL237C	HAP2	YHR001W-A	QCR10	0	0	1	0	0	0
YGL237C	HAP2	YDR529C	QCR7	0	0	1	0	0	0
YGL237C	HAP2	YGR183C	QCR9	0	0	1	0	0	0
YGL237C	HAP2	YEL024W	RIP1	0	0	1	0	0	0
YGL237C	HAP2	YPL207W	TYW1	0	0	1	0	0	0
YGL237C	HAP2	YGR234W	YHB1	0	0	1	0	0	0
YGL237C	HAP2	YFR003C	YPI1	0	0	1	0	0	0
YHL020C	OPI1	YBR029C	CDS1	0	0	0	1	0	0
YHL020C	OPI1	YNL130C	CPT1	0	0	0	1	0	0
YHL020C	OPI1	YDR147W	EKI1	0	0	0	1	0	0
YHL020C	OPI1	YPL231W	FAS2	0	0	0	1	0	0
YHL020C	OPI1	YGL077C	HNM1	0	0	1	0	0	0
YHL020C	OPI1	YJL153C	INO1	0	0	1	1	0	0
YHL020C	OPI1	YDR497C	ITR1	0	0	1	1	0	0
YHL020C	OPI1	YJR074W	MOG1	0	0	1	0	0	0
YHL020C	OPI1	YNL129W	NRK1	0	0	0	1	0	0
YHL020C	OPI1	YJR073C	OPI3	0	0	1	0	0	0
YHL020C	OPI1	YNL169C	PSD1	0	0	1	0	0	0
YHL020C	OPI1	YBR030W	RKM3	0	0	0	1	0	0
YHR006W	STP2	YDR216W	ADR1	0	0	1	0	0	0
YHR006W	STP2	YCL025C	AGP1	0	0	1	1	0	0
YHR006W	STP2	YOL077W-A	ATP19	0	0	1	0	0	0
YHR006W	STP2	YDR508C	GNP1	0	0	0	1	0	0
YHR084W	STE12	YDR085C	AFR1	0	0	1	0	0	0
YHR084W	STE12	YNR044W	AGA1	0	0	1	1	0	0
YHR084W	STE12	YGL032C	AGA2	0	0	1	0	0	0
YHR084W	STE12	YIL015W	BAR1	0	0	1	1	0	0
YHR084W	STE12	YNL192W	CHS1	0	0	1	0	0	0
YHR084W	STE12	YCL027W	FUS1	0	0	1	1	0	0
YHR084W	STE12	YMR232W	FUS2	0	0	0	1	0	0
YHR084W	STE12	YBL016W	FUS3	0	0	1	1	0	0
YHR084W	STE12	YDR309C	GIC2	0	0	1	1	0	0
YHR084W	STE12	YHR005C	GPA1	0	0	1	1	0	0
YHR084W	STE12	YFL027C	GYP8	0	0	0	1	0	0
YHR084W	STE12	YKL189W	HYM1	0	0	1	0	0	0
YHR084W	STE12	YCL055W	KAR4	0	0	1	1	0	0
YHR084W	STE12	YMR065W	KAR5	0	0	1	1	0	0
YHR084W	STE12	YDR461W	MFA1	0	0	1	0	0	0
YHR084W	STE12	YGR014W	MSB2	0	0	1	0	0	0
YHR084W	STE12	YDL127W	PCL2	0	0	0	1	0	0
YHR084W	STE12	YNL279W	PRM1	0	0	0	1	0	0
YHR084W	STE12	YIL037C	PRM2	0	0	1	0	0	0
YHR084W	STE12	YPL192C	PRM3	0	0	0	1	0	0
YHR084W	STE12	YPL156C	PRM4	0	0	1	1	0	0
YHR084W	STE12	YML047C	PRM6	0	0	1	1	0	0
YHR084W	STE12	YML046W	PRP39	0	0	1	0	0	0
YHR084W	STE12	YOR247W	SRL1	0	0	1	0	0	0
YHR084W	STE12	YKR091W	SRL3	0	0	1	0	0	0
YHR084W	STE12	YLR452C	SST2	0	0	1	1	0	0
YHR084W	STE12	YHR084W	STE12	0	0	1	1	0	0
YHR084W	STE12	YFL026W	STE2	0	0	1	1	0	0
YHR084W	STE12	YKL209C	STE6	0	0	0	1	0	0
YHR084W	STE12	YBR083W	TEC1	0	0	1	1	0	0
YHR084W	STE12	YKR042W	UTH1	0	0	1	0	0	0
YHR178W	STB5	YMR318C	ADH6	0	0	0	0	0	1
YHR178W	STB5	YDR216W	ADR1	0	0	0	0	0	1
YHR178W	STB5	YFL030W	AGX1	0	0	0	0	0	1
YHR178W	STB5	YPL061W	ALD6	0	0	0	0	0	1
YHR178W	STB5	YDR441C	APT2	0	0	0	0	0	1
YHR178W	STB5	YLL052C	AQY2	0	0	0	0	0	1
YHR178W	STB5	YBR149W	ARA1	0	0	0	0	0	1
YHR178W	STB5	YNR019W	ARE2	0	0	0	0	0	1
YHR178W	STB5	YHR137W	ARO9	0	0	0	0	0	1
YHR178W	STB5	YDR384C	ATO3	0	0	0	0	0	1
YHR178W	STB5	YML116W	ATR1	0	0	0	0	0	1
YHR178W	STB5	YPR122W	AXL1	0	0	0	0	0	1
YHR178W	STB5	YAL060W	BDH1	0	0	0	0	0	1
YHR178W	STB5	YPL111W	CAR1	0	0	0	0	0	1
YHR178W	STB5	YOR028C	CIN5	0	0	0	0	0	1
YHR178W	STB5	YPR013C	CMR3	0	0	0	0	0	1
YHR178W	STB5	YOR316C	COT1	0	0	0	0	0	1
YHR178W	STB5	YDR231C	COX20	0	0	0	0	0	1
YHR178W	STB5	YGL196W	DSD1	0	0	0	0	0	1
YHR178W	STB5	YBL043W	ECM13	0	0	0	0	0	1
YHR178W	STB5	YOR092W	ECM3	0	0	0	0	0	1
YHR178W	STB5	YLR299W	ECM38	0	0	0	0	0	1
YHR178W	STB5	YGR175C	ERG1	0	0	0	0	0	1
YHR178W	STB5	YLR100W	ERG27	0	0	0	0	0	1
YHR178W	STB5	YER044C	ERG28	0	0	0	0	0	1
YHR178W	STB5	YLR056W	ERG3	0	0	0	0	0	1
YHR178W	STB5	YMR015C	ERG5	0	0	0	0	0	1
YHR178W	STB5	YML008C	ERG6	0	0	0	0	0	1
YHR178W	STB5	YBR210W	ERV15	0	0	0	0	0	1
YHR178W	STB5	YKL187C	FAT3	0	0	0	0	0	1
YHR178W	STB5	YLR377C	FBP1	0	0	0	0	0	1
YHR178W	STB5	YDL222C	FMP45	0	0	0	0	0	1
YHR178W	STB5	YKR009C	FOX2	0	0	0	0	0	1
YHR178W	STB5	YHR128W	FUR1	0	0	0	0	0	1
YHR178W	STB5	YOR120W	GCY1	0	0	0	0	0	1
YHR178W	STB5	YDL198C	GGC1	0	0	0	0	0	1
YHR178W	STB5	YHR183W	GND1	0	0	1	0	0	1
YHR178W	STB5	YGR256W	GND2	0	0	0	0	0	1
YHR178W	STB5	YDR508C	GNP1	0	0	0	0	0	1
YHR178W	STB5	YNL274C	GOR1	0	0	0	0	0	1
YHR178W	STB5	YKL109W	HAP4	0	0	0	0	0	1
YHR178W	STB5	YDR232W	HEM1	0	0	0	0	0	1
YHR178W	STB5	YML075C	HMG1	0	0	0	0	0	1
YHR178W	STB5	YLR113W	HOG1	0	0	0	0	0	1
YHR178W	STB5	YDR158W	HOM2	0	0	0	0	0	1
YHR178W	STB5	YFL014W	HSP12	0	0	0	0	0	1
YHR178W	STB5	YFR053C	HXK1	0	0	0	0	0	1
YHR178W	STB5	YDR345C	HXT3	0	0	0	0	0	1
YHR178W	STB5	YHR092C	HXT4	0	0	0	0	0	1
YHR178W	STB5	YEL034W	HYP2	0	0	0	0	0	1
YHR178W	STB5	YMR195W	ICY1	0	0	0	0	0	1
YHR178W	STB5	YLR174W	IDP2	0	0	0	0	0	1
YHR178W	STB5	YBR159W	IFA38	0	0	0	0	0	1
YHR178W	STB5	YJL216C	IMA5	0	0	0	0	0	1
YHR178W	STB5	YDR072C	IPT1	0	0	0	0	0	1
YHR178W	STB5	YPL017C	IRC15	0	0	0	0	0	1
YHR178W	STB5	YOL002C	IZH2	0	0	0	0	0	1
YHR178W	STB5	YDL049C	KNH1	0	0	1	0	0	1
YHR178W	STB5	YOL126C	MDH2	0	0	0	0	0	1
YHR178W	STB5	YKR069W	MET1	0	0	0	0	0	1
YHR178W	STB5	YGL125W	MET13	0	0	0	0	0	1
YHR178W	STB5	YNL218W	MGS1	0	0	0	0	0	1
YHR178W	STB5	YGL209W	MIG2	0	0	0	0	0	1
YHR178W	STB5	YJL186W	MNN5	0	0	0	0	0	1
YHR178W	STB5	YMR070W	MOT3	0	0	0	0	0	1
YHR178W	STB5	YDR347W	MRP1	0	0	0	0	0	1
YHR178W	STB5	YKL062W	MSN4	0	0	0	0	0	1
YHR178W	STB5	YDR277C	MTH1	0	0	0	0	0	1
YHR178W	STB5	YJL116C	NCA3	0	0	0	0	0	1
YHR178W	STB5	YMR145C	NDE1	0	0	0	0	0	1
YHR178W	STB5	YGL221C	NIF3	0	0	0	0	0	1
YHR178W	STB5	YBR066C	NRG2	0	0	0	0	0	1
YHR178W	STB5	YKL120W	OAC1	0	0	0	0	0	1
YHR178W	STB5	YPL171C	OYE3	0	0	0	0	0	1
YHR178W	STB5	YGR239C	PEX21	0	0	0	0	0	1
YHR178W	STB5	YPL112C	PEX25	0	0	0	0	0	1
YHR178W	STB5	YDR244W	PEX5	0	0	0	0	0	1
YHR178W	STB5	YOL084W	PHM7	0	0	0	0	0	1
YHR178W	STB5	YMR008C	PLB1	0	0	0	0	0	1
YHR178W	STB5	YOR161C	PNS1	0	0	0	0	0	1
YHR178W	STB5	YNL055C	POR1	0	0	0	0	0	1
YHR178W	STB5	YIL160C	POT1	0	0	0	0	0	1
YHR178W	STB5	YPL148C	PPT2	0	0	0	0	0	1
YHR178W	STB5	YPL147W	PXA1	0	0	0	0	0	1
YHR178W	STB5	YKL188C	PXA2	0	0	0	0	0	1
YHR178W	STB5	YOL010W	RCL1	0	0	0	0	0	1
YHR178W	STB5	YPL066W	RGL1	0	0	0	0	0	1
YHR178W	STB5	YNL180C	RHO5	0	0	0	0	0	1
YHR178W	STB5	YOL143C	RIB4	0	0	0	0	0	1
YHR178W	STB5	YBR153W	RIB7	0	0	0	0	0	1
YHR178W	STB5	YHL024W	RIM4	0	0	0	0	0	1
YHR178W	STB5	YGL045W	RIM8	0	0	0	0	0	1
YHR178W	STB5	YOR119C	RIO1	0	0	0	0	0	1
YHR178W	STB5	YOR095C	RKI1	0	0	0	0	0	1
YHR178W	STB5	YDR091C	RLI1	0	0	0	0	0	1
YHR178W	STB5	YGR044C	RME1	0	0	0	0	0	1
YHR178W	STB5	YPL024W	RMI1	0	0	0	0	0	1
YHR178W	STB5	YDR156W	RPA14	0	0	0	0	0	1
YHR178W	STB5	RPL12a	RPL12a	0	0	0	0	0	1
YHR178W	STB5	YML091C	RPM2	0	0	0	0	0	1
YHR178W	STB5	YOR369C	RPS12	0	0	0	0	0	1
YHR178W	STB5	YMR272C	SCS7	0	0	0	0	0	1
YHR178W	STB5	YOR184W	SER1	0	0	0	0	0	1
YHR178W	STB5	YJR095W	SFC1	0	0	0	0	0	1
YHR178W	STB5	YOR315W	SFG1	0	0	0	0	0	1
YHR178W	STB5	YJL089W	SIP4	0	0	0	0	0	1
YHR178W	STB5	YDR073W	SNF11	0	0	0	0	0	1
YHR178W	STB5	YDR011W	SNQ2	0	0	0	0	0	1
YHR178W	STB5	YJR104C	SOD1	0	0	0	0	0	1
YHR178W	STB5	YHR163W	SOL3	0	0	1	0	0	1
YHR178W	STB5	YNL202W	SPS19	0	0	0	0	0	1
YHR178W	STB5	YHR178W	STB5	0	0	0	0	0	1
YHR178W	STB5	YDR536W	STL1	0	0	0	0	0	1
YHR178W	STB5	YMR039C	SUB1	0	0	0	0	0	1
YHR178W	STB5	YDR346C	SVF1	0	0	0	0	0	1
YHR178W	STB5	YOR179C	SYC1	0	0	0	0	0	1
YHR178W	STB5	YLR354C	TAL1	0	0	0	0	0	1
YHR178W	STB5	YGR046W	TAM41	0	0	0	0	0	1
YHR178W	STB5	YOL020W	TAT2	0	0	0	0	0	1
YHR178W	STB5	YPR074C	TKL1	0	0	0	0	0	1
YHR178W	STB5	YOR273C	TPO4	0	0	0	0	0	1
YHR178W	STB5	YPL186C	UIP4	0	0	0	0	0	1
YHR178W	STB5	YDR207C	UME6	0	0	0	0	0	1
YHR178W	STB5	YDR247W	VHS1	0	0	0	0	0	1
YHR178W	STB5	YBR105C	VID24	0	0	0	0	0	1
YHR178W	STB5	YCR061W	YCR061W	0	0	0	0	0	1
YHR178W	STB5	YDR061W	YDR061W	0	0	0	0	0	1
YHR178W	STB5	YDR222W	YDR222W	0	0	0	0	0	1
YHR178W	STB5	YDR248C	YDR248C	0	0	0	0	0	1
YHR178W	STB5	YDR379C-A	YDR379C-A	0	0	0	0	0	1
YHR178W	STB5	YEL041W	YEF1	0	0	0	0	0	1
YHR178W	STB5	YFL054C	YFL054C	0	0	0	0	0	1
YHR178W	STB5	YGR035C	YGR035C	0	0	0	0	0	1
YHR178W	STB5	YHR112C	YHR112C	0	0	0	0	0	1
YHR178W	STB5	YLR152C	YLR152C	0	0	0	0	0	1
YHR178W	STB5	YLR297W	YLR297W	0	0	0	0	0	1
YHR178W	STB5	YLR407W	YLR407W	0	0	0	0	0	1
YHR178W	STB5	YMR181C	YMR181C	0	0	0	0	0	1
YHR178W	STB5	YMR206W	YMR206W	0	0	0	0	0	1
YHR178W	STB5	YMR315W	YMR315W	0	0	0	0	0	1
YHR178W	STB5	YPR028W	YOP1	0	0	0	0	0	1
YHR178W	STB5	YGR281W	YOR1	0	0	0	0	0	1
YHR178W	STB5	YOR228C	YOR228C	0	0	0	0	0	1
YHR178W	STB5	YOR342C	YOR342C	0	0	0	0	0	1
YHR178W	STB5	YDL235C	YPD1	0	0	0	0	0	1
YHR178W	STB5	YPR015C	YPR015C	0	0	0	0	0	1
YHR178W	STB5	YOR087W	YVC1	0	0	0	0	0	1
YHR206W	SKN7	YFL030W	AGX1	0	0	1	0	0	0
YHR206W	SKN7	YLR109W	AHP1	0	0	1	1	0	0
YHR206W	SKN7	YGR225W	AMA1	0	0	0	1	0	0
YHR206W	SKN7	YGR097W	ASK10	0	0	1	0	0	0
YHR206W	SKN7	YLR110C	CCW12	0	0	0	1	0	0
YHR206W	SKN7	YJL158C	CIS3	0	0	1	1	0	0
YHR206W	SKN7	YMR199W	CLN1	0	0	1	0	0	0
YHR206W	SKN7	YDR231C	COX20	0	0	1	0	0	0
YHR206W	SKN7	YDR155C	CPR1	0	0	0	1	0	0
YHR206W	SKN7	YOR100C	CRC1	0	0	1	0	0	0
YHR206W	SKN7	YGR088W	CTT1	0	0	0	1	0	0
YHR206W	SKN7	YKL096W	CWP1	0	0	1	0	0	0
YHR206W	SKN7	YKL096W-A	CWP2	0	0	1	1	0	0
YHR206W	SKN7	YOL052C-A	DDR2	0	0	0	1	0	0
YHR206W	SKN7	YMR173W	DDR48	0	0	1	1	0	0
YHR206W	SKN7	YGR146C	ECL1	0	0	1	0	0	0
YHR206W	SKN7	YBR078W	ECM33	0	0	0	1	0	0
YHR206W	SKN7	YHR007C	ERG11	0	0	1	0	0	0
YHR206W	SKN7	YGR060W	ERG25	0	0	0	1	0	0
YHR206W	SKN7	YEL047C	FRD1	0	0	1	0	0	0
YHR206W	SKN7	YCL058C	FYV5	0	0	0	1	0	0
YHR206W	SKN7	YMR307W	GAS1	0	0	1	1	0	0
YHR206W	SKN7	YMR136W	GAT2	0	0	0	1	0	0
YHR206W	SKN7	YDR309C	GIC2	0	0	1	1	0	0
YHR206W	SKN7	YGR032W	GSC2	0	0	1	0	0	0
YHR206W	SKN7	YLR258W	GSY2	0	0	1	0	0	0
YHR206W	SKN7	YNL014W	HEF3	0	0	0	1	0	0
YHR206W	SKN7	YDR232W	HEM1	0	0	1	0	0	0
YHR206W	SKN7	YDR044W	HEM13	0	0	1	0	0	0
YHR206W	SKN7	YLR205C	HMX1	0	0	1	1	0	0
YHR206W	SKN7	YMR251W-A	HOR7	0	0	0	1	0	0
YHR206W	SKN7	YLL026W	HSP104	0	0	1	0	0	0
YHR206W	SKN7	YBR157C	ICS2	0	0	1	0	0	0
YHR206W	SKN7	YMR195W	ICY1	0	0	1	1	0	0
YHR206W	SKN7	YEL044W	IES6	0	0	0	1	0	0
YHR206W	SKN7	YJL106W	IME2	0	0	1	0	0	0
YHR206W	SKN7	YDL049C	KNH1	0	0	1	1	0	0
YHR206W	SKN7	YLL019C	KNS1	0	0	1	1	0	0
YHR206W	SKN7	YDL051W	LHP1	0	0	1	0	0	0
YHR206W	SKN7	YDL182W	LYS20	0	0	1	1	0	0
YHR206W	SKN7	YOL060C	MAM3	0	0	0	1	0	0
YHR206W	SKN7	YNL173C	MDG1	0	0	0	1	0	0
YHR206W	SKN7	YGL125W	MET13	0	0	0	1	0	0
YHR206W	SKN7	YGR249W	MGA1	0	0	0	1	0	0
YHR206W	SKN7	YER001W	MNN1	0	0	1	0	0	0
YHR206W	SKN7	YKL062W	MSN4	0	0	1	1	0	0
YHR206W	SKN7	YJL116C	NCA3	0	0	1	1	0	0
YHR206W	SKN7	YDR043C	NRG1	0	0	1	1	0	0
YHR206W	SKN7	YGL038C	OCH1	0	0	1	0	0	0
YHR206W	SKN7	YDL127W	PCL2	0	0	1	0	0	0
YHR206W	SKN7	YIL013C	PDR11	0	0	1	1	0	0
YHR206W	SKN7	YFR034C	PHO4	0	0	1	0	0	0
YHR206W	SKN7	YGR086C	PIL1	0	0	0	1	0	0
YHR206W	SKN7	YKL163W	PIR3	0	0	1	0	0	0
YHR206W	SKN7	YMR006C	PLB2	0	0	1	0	0	0
YHR206W	SKN7	YEL017C-A	PMP2	0	0	0	1	0	0
YHR206W	SKN7	YOR161C	PNS1	0	0	1	0	0	0
YHR206W	SKN7	YJL079C	PRY1	0	0	1	0	0	0
YHR206W	SKN7	YKR013W	PRY2	0	0	1	1	0	0
YHR206W	SKN7	YER075C	PTP3	0	0	1	1	0	0
YHR206W	SKN7	YKR093W	PTR2	0	0	0	1	0	0
YHR206W	SKN7	YLR414C	PUN1	0	0	1	0	0	0
YHR206W	SKN7	YOR348C	PUT4	0	0	0	1	0	0
YHR206W	SKN7	YOR107W	RGS2	0	0	0	1	0	0
YHR206W	SKN7	YPL024W	RMI1	0	0	0	1	0	0
YHR206W	SKN7	YGR180C	RNR4	0	0	1	0	0	0
YHR206W	SKN7	YPR065W	ROX1	0	0	1	1	0	0
YHR206W	SKN7	YDR156W	RPA14	0	0	1	0	0	0
YHR206W	SKN7	YML091C	RPM2	0	0	0	1	0	0
YHR206W	SKN7	YGR213C	RTA1	0	0	1	0	0	0
YHR206W	SKN7	YMR305C	SCW10	0	0	1	1	0	0
YHR206W	SKN7	YGR279C	SCW4	0	0	1	0	0	0
YHR206W	SKN7	YIL099W	SGA1	0	0	0	1	0	0
YHR206W	SKN7	YOR247W	SRL1	0	0	1	0	0	0
YHR206W	SKN7	YDL048C	STP4	0	0	0	1	0	0
YHR206W	SKN7	YPR151C	SUE1	0	0	0	1	0	0
YHR206W	SKN7	YPR009W	SUT2	0	0	1	1	0	0
YHR206W	SKN7	YJL035C	TAD2	0	0	1	0	0	0
YHR206W	SKN7	YBR083W	TEC1	0	0	0	1	0	0
YHR206W	SKN7	YER011W	TIR1	0	0	1	0	0	0
YHR206W	SKN7	YDR007W	TRP1	0	0	0	1	0	0
YHR206W	SKN7	YML028W	TSA1	0	0	1	0	0	0
YHR206W	SKN7	YJL048C	UBX6	0	0	0	1	0	0
YHR206W	SKN7	YKR042W	UTH1	0	0	1	1	0	0
YHR206W	SKN7	YML007W	YAP1	0	0	0	1	0	0
YHR206W	SKN7	YBL029W	YBL029W	0	0	0	1	0	0
YHR206W	SKN7	YDL124W	YDL124W	0	0	1	0	0	0
YHR206W	SKN7	YDR186C	YDR186C	0	0	1	0	0	0
YHR206W	SKN7	YGR050C	YGR050C	0	0	1	0	0	0
YHR206W	SKN7	YIL165C	YIL165C	0	0	0	1	0	0
YHR206W	SKN7	YJL107C	YJL107C	0	0	0	1	0	0
YHR206W	SKN7	YLR108C	YLR108C	0	0	1	1	0	0
YHR206W	SKN7	YLR257W	YLR257W	0	0	1	1	0	0
YHR206W	SKN7	YLR413W	YLR413W	0	0	1	0	0	0
YHR206W	SKN7	YLR121C	YPS3	0	0	1	0	0	0
YIL036W	CST6	YOR128C	ADE2	0	1	0	0	0	0
YIL036W	CST6	YLR109W	AHP1	0	1	0	0	0	0
YIL036W	CST6	YLR089C	ALT1	0	1	0	0	0	0
YIL036W	CST6	YDR111C	ALT2	0	1	0	0	0	0
YIL036W	CST6	YOL058W	ARG1	0	1	0	0	0	0
YIL036W	CST6	YAL061W	BDH2	0	1	0	0	0	0
YIL036W	CST6	YOL164W	BDS1	0	1	0	0	0	0
YIL036W	CST6	YOR028C	CIN5	0	1	0	0	0	0
YIL036W	CST6	YGR108W	CLB1	0	1	0	0	0	0
YIL036W	CST6	YJR109C	CPA2	0	1	0	0	0	0
YIL036W	CST6	YOL052C-A	DDR2	0	1	0	0	0	0
YIL036W	CST6	YPL265W	DIP5	0	1	0	0	0	0
YIL036W	CST6	YEL071W	DLD3	0	1	0	0	0	0
YIL036W	CST6	YBL043W	ECM13	0	1	0	0	0	0
YIL036W	CST6	YOR317W	FAA1	0	1	0	0	0	0
YIL036W	CST6	YJL161W	FMP33	0	1	0	0	0	0
YIL036W	CST6	YOR120W	GCY1	0	1	0	0	0	0
YIL036W	CST6	YDR508C	GNP1	0	1	0	0	0	0
YIL036W	CST6	YOL155C	HPF1	0	1	0	0	0	0
YIL036W	CST6	YFL014W	HSP12	0	1	0	0	0	0
YIL036W	CST6	YPL135W	ISU1	0	1	0	0	0	0
YIL036W	CST6	YNR050C	LYS9	0	1	0	0	0	0
YIL036W	CST6	YML128C	MSC1	0	1	0	0	0	0
YIL036W	CST6	YMR164C	MSS11	0	1	0	0	0	0
YIL036W	CST6	YJL116C	NCA3	0	1	0	0	0	0
YIL036W	CST6	YNL036W	NCE103	0	1	0	0	0	0
YIL036W	CST6	YKR093W	PTR2	0	1	0	0	0	0
YIL036W	CST6	YGL062W	PYC1	0	1	0	0	0	0
YIL036W	CST6	YHL024W	RIM4	0	1	0	0	0	0
YIL036W	CST6	YPL024W	RMI1	0	1	0	0	0	0
YIL036W	CST6	YPR065W	ROX1	0	1	0	0	0	0
YIL036W	CST6	YDL204W	RTN2	0	1	0	0	0	0
YIL036W	CST6	YPL274W	SAM3	0	1	0	0	0	0
YIL036W	CST6	YMR175W	SIP18	0	1	0	0	0	0
YIL036W	CST6	YDR536W	STL1	0	1	0	0	0	0
YIL036W	CST6	YJL164C	TPK1	0	1	0	0	0	0
YIL036W	CST6	YGR065C	VHT1	0	1	0	0	0	0
YIL036W	CST6	YAR068W	YAR068W	0	1	0	0	0	0
YIL036W	CST6	YER024W	YAT2	0	1	0	0	0	0
YIL036W	CST6	YBR085C-A	YBR085C-A	0	1	0	0	0	0
YIL036W	CST6	YER053C-A	YER053C-A	0	1	0	0	0	0
YIL036W	CST6	YGR066C	YGR066C	0	1	0	0	0	0
YIL036W	CST6	YLR053C	YLR053C	0	1	0	0	0	0
YIL036W	CST6	YLR108C	YLR108C	0	1	0	0	0	0
YIL036W	CST6	YNR014W	YNR014W	0	1	0	0	0	0
YIL036W	CST6	YOR302W	YOR302W	0	1	0	0	0	0
YIL036W	CST6	YGL255W	ZRT1	0	1	0	0	0	0
YIL131C	FKH1	YGL256W	ADH4	0	0	1	0	0	0
YIL131C	FKH1	YCL064C	CHA1	0	0	1	0	0	0
YIL131C	FKH1	YPR119W	CLB2	0	0	1	0	0	0
YIL131C	FKH1	YER124C	DSE1	0	0	1	0	0	0
YIL131C	FKH1	YCR075C	ERS1	0	0	1	0	0	0
YIL131C	FKH1	YPL141C	FRK1	0	0	1	0	0	0
YIL131C	FKH1	YMR215W	GAS3	0	0	1	0	0	0
YIL131C	FKH1	YOL030W	GAS5	0	0	1	0	0	0
YIL131C	FKH1	YHR094C	HXT1	0	0	1	0	0	0
YIL131C	FKH1	YER070W	RNR1	0	0	1	0	0	0
YIL131C	FKH1	YGL028C	SCW11	0	0	1	0	0	0
YIL131C	FKH1	YGR099W	TEL2	0	0	1	0	0	0
YIL131C	FKH1	YBR139W	YBR139W	0	0	1	0	0	0
YIL131C	FKH1	YKL069W	YKL069W	0	0	1	0	0	0
YIR023W	DAL81	YCL025C	AGP1	0	0	1	0	0	0
YIR023W	DAL81	YPR145W	ASN1	0	0	1	0	0	0
YIR023W	DAL81	YBR068C	BAP2	0	0	1	0	0	0
YIR023W	DAL81	YDR046C	BAP3	0	0	1	0	0	0
YIR023W	DAL81	YPL265W	DIP5	0	0	1	0	0	0
YIR023W	DAL81	YDR047W	HEM12	0	0	1	0	0	0
YIR023W	DAL81	YDL182W	LYS20	0	0	1	0	0	0
YIR023W	DAL81	YLR303W	MET17	0	0	1	0	0	0
YIR023W	DAL81	YJL212C	OPT1	0	0	1	0	0	0
YIR023W	DAL81	YKR093W	PTR2	0	0	1	0	0	0
YIR023W	DAL81	YOL080C	REX4	0	0	1	0	0	0
YIR023W	DAL81	YDL153C	SAS10	0	0	1	0	0	0
YIR023W	DAL81	YBR069C	TAT1	0	0	1	0	0	0
YJL056C	ZAP1	YGL256W	ADH4	1	0	0	0	0	0
YJL056C	ZAP1	YPL250C	ICY2	1	0	0	0	0	0
YJL056C	ZAP1	YNL254C	RTC4	0	1	0	0	0	0
YJL056C	ZAP1	YJL055W	YJL055W	1	0	0	0	0	0
YJL056C	ZAP1	YJL056C	ZAP1	1	1	0	0	0	0
YJL056C	ZAP1	YOL154W	ZPS1	1	1	0	0	0	0
YJL056C	ZAP1	YGL255W	ZRT1	1	1	0	0	0	0
YJL056C	ZAP1	YLR130C	ZRT2	1	1	0	0	0	0
YJL056C	ZAP1	YKL175W	ZRT3	1	1	0	0	0	0
YJL089W	SIP4	YBL015W	ACH1	0	0	0	0	1	1
YJL089W	SIP4	YAL054C	ACS1	0	0	0	0	1	1
YJL089W	SIP4	YCR010C	ADY2	0	0	0	0	1	0
YJL089W	SIP4	YFL055W	AGP3	0	0	0	0	0	1
YJL089W	SIP4	YML042W	CAT2	0	0	0	0	1	1
YJL089W	SIP4	YLR308W	CDA2	0	0	0	0	0	1
YJL089W	SIP4	YOR100C	CRC1	0	0	0	0	1	1
YJL089W	SIP4	YLR377C	FBP1	0	0	0	0	1	1
YJL089W	SIP4	YER065C	ICL1	0	0	0	0	1	1
YJL089W	SIP4	YOL126C	MDH2	0	0	0	0	0	1
YJL089W	SIP4	YNL117W	MLS1	0	0	0	0	1	0
YJL089W	SIP4	YKR097W	PCK1	0	0	0	0	1	0
YJL089W	SIP4	YBR050C	REG2	0	0	0	0	0	1
YJL089W	SIP4	YDR180W	SCC2	0	0	0	0	0	1
YJL089W	SIP4	YJR095W	SFC1	0	0	0	0	1	1
YJL089W	SIP4	YJL089W	SIP4	0	0	0	0	0	1
YJL089W	SIP4	YOL125W	TRM13	0	0	0	0	0	1
YJL089W	SIP4	YAR035W	YAT1	0	0	0	0	0	1
YJL089W	SIP4	YGR067C	YGR067C	0	0	0	0	1	0
YJR060W	CBF1	YCR088W	ABP1	0	0	0	0	1	0
YJR060W	CBF1	YNL220W	ADE12	0	0	0	0	0	1
YJR060W	CBF1	YGR204W	ADE3	0	0	0	0	0	1
YJR060W	CBF1	YMR083W	ADH3	0	0	0	0	0	1
YJR060W	CBF1	YCR011C	ADP1	0	0	0	0	0	1
YJR060W	CBF1	YER017C	AFG3	0	0	0	0	0	1
YJR060W	CBF1	YDR530C	APA2	0	0	0	0	1	1
YJR060W	CBF1	YHR113W	APE4	0	0	0	0	0	1
YJR060W	CBF1	YNL094W	APP1	0	0	0	0	0	1
YJR060W	CBF1	YNR019W	ARE2	0	0	0	0	0	1
YJR060W	CBF1	YHR137W	ARO9	0	0	0	0	1	0
YJR060W	CBF1	YLR158C	ASP3-3	0	0	0	0	1	1
YJR060W	CBF1	YOR377W	ATF1	0	0	0	0	1	0
YJR060W	CBF1	YNL223W	ATG4	0	0	0	0	0	1
YJR060W	CBF1	YBR039W	ATP3	0	0	0	0	0	1
YJR060W	CBF1	YKL016C	ATP7	0	0	0	0	1	1
YJR060W	CBF1	YNL259C	ATX1	0	0	0	0	1	1
YJR060W	CBF1	YIL088C	AVT7	0	0	0	0	0	1
YJR060W	CBF1	YER177W	BMH1	0	0	0	0	0	1
YJR060W	CBF1	YJL060W	BNA3	0	0	0	0	1	1
YJR060W	CBF1	YGR230W	BNS1	0	0	0	0	0	1
YJR060W	CBF1	YER114C	BOI2	0	0	0	0	1	1
YJR060W	CBF1	YLR267W	BOP2	0	0	0	0	1	0
YJR060W	CBF1	YDL037C	BSC1	0	0	0	0	0	1
YJR060W	CBF1	YJL209W	CBP1	0	0	0	0	1	0
YJR060W	CBF1	YDR054C	CDC34	0	0	0	0	1	0
YJR060W	CBF1	YDR254W	CHL4	0	0	0	0	1	0
YJR060W	CBF1	YDR267C	CIA1	0	0	0	0	0	1
YJR060W	CBF1	YJL158C	CIS3	0	0	0	0	0	1
YJR060W	CBF1	YOR039W	CKB2	0	0	0	0	0	1
YJR060W	CBF1	YBR135W	CKS1	0	0	0	0	0	1
YJR060W	CBF1	YGR120C	COG2	0	0	0	0	0	1
YJR060W	CBF1	YNL232W	CSL4	0	0	0	0	0	1
YJR060W	CBF1	YPL018W	CTF19	0	0	0	0	1	1
YJR060W	CBF1	YGL027C	CWH41	0	0	0	0	0	1
YJR060W	CBF1	YJR048W	CYC1	0	0	0	0	0	1
YJR060W	CBF1	YPL170W	DAP1	0	0	0	0	0	1
YJR060W	CBF1	YDR141C	DOP1	0	0	0	0	1	1
YJR060W	CBF1	YKL191W	DPH2	0	0	0	0	0	1
YJR060W	CBF1	YAL026C	DRS2	0	0	0	0	1	1
YJR060W	CBF1	YGR146C	ECL1	0	0	0	0	1	1
YJR060W	CBF1	YGR200C	ELP2	0	0	0	0	1	0
YJR060W	CBF1	YFL024C	EPL1	0	0	0	0	0	1
YJR060W	CBF1	YJL167W	ERG20	0	0	0	0	1	1
YJR060W	CBF1	YPL221W	FLC1	0	0	0	0	0	1
YJR060W	CBF1	YHR089C	GAR1	0	0	0	0	1	1
YJR060W	CBF1	YAL062W	GDH3	0	0	0	0	0	1
YJR060W	CBF1	YMR255W	GFD1	0	0	0	0	1	0
YJR060W	CBF1	YEL046C	GLY1	0	0	0	0	0	1
YJR060W	CBF1	YCL035C	GRX1	0	0	0	0	0	1
YJR060W	CBF1	YDR513W	GRX2	0	0	0	0	0	1
YJR060W	CBF1	YJL101C	GSH1	0	0	0	0	0	1
YJR060W	CBF1	YLR258W	GSY2	0	0	0	0	1	0
YJR060W	CBF1	YGR154C	GTO1	0	0	0	0	0	1
YJR060W	CBF1	YML121W	GTR1	0	0	0	0	0	1
YJR060W	CBF1	YFL031W	HAC1	0	0	0	0	0	1
YJR060W	CBF1	YDR044W	HEM13	0	0	0	0	0	1
YJR060W	CBF1	YER055C	HIS1	0	0	0	0	1	0
YJR060W	CBF1	YIL116W	HIS5	0	0	0	0	1	1
YJR060W	CBF1	YER057C	HMF1	0	0	0	0	1	1
YJR060W	CBF1	YER052C	HOM3	0	0	0	0	1	0
YJR060W	CBF1	YLR301W	HRI1	0	0	0	0	0	1
YJR060W	CBF1	YOR319W	HSH49	0	0	0	0	0	1
YJR060W	CBF1	YDR191W	HST4	0	0	0	0	0	1
YJR060W	CBF1	YGR223C	HSV2	0	0	0	0	1	0
YJR060W	CBF1	YBL002W	HTB2	0	0	0	0	0	1
YJR060W	CBF1	YNR032C-A	HUB1	0	0	0	0	1	1
YJR060W	CBF1	YFR053C	HXK1	0	0	0	0	0	1
YJR060W	CBF1	YMR195W	ICY1	0	0	0	0	1	1
YJR060W	CBF1	YPL250C	ICY2	0	0	0	0	1	1
YJR060W	CBF1	YNL037C	IDH1	0	0	0	0	1	1
YJR060W	CBF1	YEL044W	IES6	0	0	0	0	0	1
YJR060W	CBF1	YHR132W-A	IGO2	0	0	0	0	1	0
YJR060W	CBF1	YJR138W	IML1	0	0	0	0	0	1
YJR060W	CBF1	YGR238C	KEL2	0	0	0	0	1	0
YJR060W	CBF1	YDR483W	KRE2	0	0	0	0	1	0
YJR060W	CBF1	YOR099W	KTR1	0	0	0	0	0	1
YJR060W	CBF1	YDL051W	LHP1	0	0	0	0	0	1
YJR060W	CBF1	YDR503C	LPP1	0	0	0	0	0	1
YJR060W	CBF1	YKR069W	MET1	0	0	0	0	0	1
YJR060W	CBF1	YFR030W	MET10	0	0	0	0	1	1
YJR060W	CBF1	YGL125W	MET13	0	0	0	0	0	1
YJR060W	CBF1	YKL001C	MET14	0	0	0	0	0	1
YJR060W	CBF1	YPR167C	MET16	0	0	0	0	1	1
YJR060W	CBF1	YNL277W	MET2	0	0	0	0	1	1
YJR060W	CBF1	YOL064C	MET22	0	0	0	0	1	1
YJR060W	CBF1	YIR017C	MET28	0	0	0	0	0	1
YJR060W	CBF1	YJR010W	MET3	0	0	0	0	1	1
YJR060W	CBF1	YIL046W	MET30	0	0	0	0	0	1
YJR060W	CBF1	YDR253C	MET32	0	0	0	0	0	1
YJR060W	CBF1	YJR137C	MET5	0	0	0	0	1	1
YJR060W	CBF1	YER091C	MET6	0	0	0	0	0	1
YJR060W	CBF1	YBR213W	MET8	0	0	0	0	0	1
YJR060W	CBF1	YER001W	MNN1	0	0	0	0	0	1
YJR060W	CBF1	YJL186W	MNN5	0	0	0	0	1	1
YJR060W	CBF1	YDL079C	MRK1	0	0	0	0	0	1
YJR060W	CBF1	YHL004W	MRP4	0	0	0	0	0	1
YJR060W	CBF1	YCR092C	MSH3	0	0	0	0	0	1
YJR060W	CBF1	YNL063W	MTQ1	0	0	0	0	0	1
YJR060W	CBF1	YPL190C	NAB3	0	0	0	0	0	1
YJR060W	CBF1	YNL036W	NCE103	0	0	0	0	0	1
YJR060W	CBF1	YHR042W	NCP1	0	0	0	0	1	0
YJR060W	CBF1	YML120C	NDI1	0	0	0	0	0	1
YJR060W	CBF1	NHP6b	NHP6b	0	0	0	0	0	1
YJR060W	CBF1	YNL175C	NOP13	0	0	0	0	0	1
YJR060W	CBF1	YCR095C	OCA4	0	0	0	0	0	1
YJR060W	CBF1	YHR001W	OSH7	0	0	0	0	0	1
YJR060W	CBF1	YDL232W	OST4	0	0	0	0	0	1
YJR060W	CBF1	YPL171C	OYE3	0	0	0	0	0	1
YJR060W	CBF1	YBR222C	PCS60	0	0	0	0	0	1
YJR060W	CBF1	YNL231C	PDR16	0	0	0	0	0	1
YJR060W	CBF1	YIL107C	PFK26	0	0	0	0	0	1
YJR060W	CBF1	YOL136C	PFK27	0	0	0	0	1	1
YJR060W	CBF1	YPL206C	PGC1	0	0	0	0	0	1
YJR060W	CBF1	YDR281C	PHM6	0	0	0	0	1	1
YJR060W	CBF1	YAR071W	PHO11	0	0	0	0	0	1
YJR060W	CBF1	YDR481C	PHO8	0	0	0	0	1	0
YJR060W	CBF1	YGR233C	PHO81	0	0	0	0	1	1
YJR060W	CBF1	YJL117W	PHO86	0	0	0	0	1	1
YJR060W	CBF1	YBR296C	PHO89	0	0	0	0	1	1
YJR060W	CBF1	YER053C	PIC2	0	0	0	0	0	1
YJR060W	CBF1	YOL011W	PLB3	0	0	0	0	0	1
YJR060W	CBF1	YNL221C	POP1	0	0	0	0	0	1
YJR060W	CBF1	YER099C	PRS2	0	0	0	0	1	1
YJR060W	CBF1	YBL068W	PRS4	0	0	0	0	1	1
YJR060W	CBF1	YAL017W	PSK1	0	0	0	0	0	1
YJR060W	CBF1	YML017W	PSP2	0	0	0	0	0	1
YJR060W	CBF1	YDR055W	PST1	0	0	0	0	0	1
YJR060W	CBF1	YER094C	PUP3	0	0	0	0	0	1
YJR060W	CBF1	YGL062W	PYC1	0	0	0	0	0	1
YJR060W	CBF1	YHR001W-A	QCR10	0	0	0	0	1	1
YJR060W	CBF1	YBR049C	REB1	0	0	0	0	0	1
YJR060W	CBF1	YPL066W	RGL1	0	0	0	0	0	1
YJR060W	CBF1	YFL033C	RIM15	0	0	0	0	0	1
YJR060W	CBF1	YEL024W	RIP1	0	0	0	0	1	1
YJR060W	CBF1	YEL072W	RMD6	0	0	0	0	1	1
YJR060W	CBF1	RPL16b	RPL16b	0	0	0	0	0	1
YJR060W	CBF1	YDL020C	RPN4	0	0	0	0	0	1
YJR060W	CBF1	RPS16b	RPS16b	0	0	0	0	0	1
YJR060W	CBF1	RPS21a	RPS21a	0	0	0	0	0	1
YJR060W	CBF1	RPS21b	RPS21b	0	0	0	0	0	1
YJR060W	CBF1	YOR001W	RRP6	0	0	0	0	1	0
YJR060W	CBF1	YIL127C	RRT14	0	0	0	0	1	0
YJR060W	CBF1	YJR113C	RSM7	0	0	0	0	0	1
YJR060W	CBF1	YGR161C	RTS3	0	0	0	0	1	0
YJR060W	CBF1	YPL235W	RVB2	0	0	0	0	1	1
YJR060W	CBF1	YDR502C	SAM2	0	0	0	0	1	1
YJR060W	CBF1	YGR049W	SCM4	0	0	0	0	1	0
YJR060W	CBF1	YOR367W	SCP1	0	0	0	0	0	1
YJR060W	CBF1	YGL056C	SDS23	0	0	0	0	0	1
YJR060W	CBF1	YPL094C	SEC62	0	0	0	0	0	1
YJR060W	CBF1	YIL074C	SER33	0	0	0	0	1	1
YJR060W	CBF1	YDR023W	SES1	0	0	0	0	1	0
YJR060W	CBF1	YJL168C	SET2	0	0	0	0	1	0
YJR060W	CBF1	YHR098C	SFB3	0	0	0	0	0	1
YJR060W	CBF1	YKR072C	SIS2	0	0	0	0	0	1
YJR060W	CBF1	YPL026C	SKS1	0	0	0	0	0	1
YJR060W	CBF1	YMR216C	SKY1	0	0	0	0	0	1
YJR060W	CBF1	YDR510W	SMT3	0	0	0	0	0	1
YJR060W	CBF1	YOR327C	SNC2	0	0	0	0	0	1
YJR060W	CBF1	YDR073W	SNF11	0	0	0	0	0	1
YJR060W	CBF1	YNL224C	SQS1	0	0	0	0	0	1
YJR060W	CBF1	YIL126W	STH1	0	0	0	0	1	1
YJR060W	CBF1	YLR092W	SUL2	0	0	0	0	0	1
YJR060W	CBF1	YJL187C	SWE1	0	0	0	0	0	1
YJR060W	CBF1	YGR046W	TAM41	0	0	0	0	0	1
YJR060W	CBF1	YMR291W	TDA1	0	0	0	0	1	0
YJR060W	CBF1	YER071C	TDA2	0	0	0	0	0	1
YJR060W	CBF1	YJL052W	TDH1	0	0	0	0	0	1
YJR060W	CBF1	YJR009C	TDH2	0	0	0	0	0	1
YJR060W	CBF1	YBR091C	TIM12	0	0	0	0	1	1
YJR060W	CBF1	YHR099W	TRA1	0	0	0	0	1	1
YJR060W	CBF1	YDL112W	TRM3	0	0	0	0	0	1
YJR060W	CBF1	YER100W	UBC6	0	0	0	0	0	1
YJR060W	CBF1	YNL229C	URE2	0	0	0	0	0	1
YJR060W	CBF1	YJL109C	UTP10	0	0	0	0	0	1
YJR060W	CBF1	YLR409C	UTP21	0	0	0	0	1	1
YJR060W	CBF1	YLR386W	VAC14	0	0	0	0	0	1
YJR060W	CBF1	YDR247W	VHS1	0	0	0	0	1	1
YJR060W	CBF1	YLR410W	VIP1	0	0	0	0	1	1
YJR060W	CBF1	YER072W	VTC1	0	0	0	0	0	1
YJR060W	CBF1	YFL004W	VTC2	0	0	0	0	1	0
YJR060W	CBF1	YJL012C	VTC4	0	0	0	0	1	0
YJR060W	CBF1	YMR197C	VTI1	0	0	0	0	0	1
YJR060W	CBF1	YOR230W	WTM1	0	0	0	0	0	1
YJR060W	CBF1	YCR087C-A	YCR087C-A	0	0	0	0	1	0
YJR060W	CBF1	YDL073W	YDL073W	0	0	0	0	0	1
YJR060W	CBF1	YDR061W	YDR061W	0	0	0	0	0	1
YJR060W	CBF1	YDR115W	YDR115W	0	0	0	0	1	0
YJR060W	CBF1	YEL043W	YEL043W	0	0	0	0	1	0
YJR060W	CBF1	YER186C	YER186C	0	0	0	0	0	1
YJR060W	CBF1	YHR033W	YHR033W	0	0	0	0	1	0
YJR060W	CBF1	YHR112C	YHR112C	0	0	0	0	0	1
YJR060W	CBF1	YIR042C	YIR042C	0	0	0	0	0	1
YJR060W	CBF1	YLR149C	YLR149C	0	0	0	0	1	1
YJR060W	CBF1	YMR196W	YMR196W	0	0	0	0	1	0
YJR060W	CBF1	YFR049W	YMR31	0	0	0	0	1	1
YJR060W	CBF1	YOR064C	YNG1	0	0	0	0	0	1
YJR060W	CBF1	YNL095C	YNL095C	0	0	0	0	0	1
YJR060W	CBF1	YER074W-A	YOS1	0	0	0	0	0	1
YJR060W	CBF1	YDR368W	YPR1	0	0	0	0	0	1
YJR060W	CBF1	YOR087W	YVC1	0	0	0	0	0	1
YJR060W	CBF1	ZSP1	ZSP1	0	0	0	0	1	0
YKL015W	PUT3	YOR303W	CPA1	0	0	0	1	0	0
YKL015W	PUT3	YBL032W	HEK2	0	0	0	1	0	0
YKL015W	PUT3	YBL063W	KIP1	0	0	0	1	0	0
YKL015W	PUT3	YBR230C	OM14	0	0	0	1	0	0
YKL015W	PUT3	YBL033C	RIB1	0	0	0	1	0	0
YKL015W	PUT3	YLR139C	SLS1	0	0	0	1	0	0
YKL015W	PUT3	YGL104C	VPS73	0	0	0	1	0	0
YKL015W	PUT3	YJL045W	YJL045W	0	0	0	1	0	0
YKL015W	PUT3	YOR302W	YOR302W	0	0	0	1	0	0
YKL038W	RGT1	YNL065W	AQR1	0	0	0	0	0	1
YKL038W	RGT1	YGL157W	ARI1	0	0	0	0	0	1
YKL038W	RGT1	YKR099W	BAS1	0	0	0	0	0	1
YKL038W	RGT1	YHR094C	HXT1	0	0	1	0	0	1
YKL038W	RGT1	YMR011W	HXT2	0	0	0	0	0	1
YKL038W	RGT1	YDR345C	HXT3	0	0	0	0	0	1
YKL038W	RGT1	YHR092C	HXT4	0	0	0	0	0	1
YKL038W	RGT1	YDR343C	HXT6	0	0	0	0	0	1
YKL038W	RGT1	YGL209W	MIG2	0	0	0	0	0	1
YKL038W	RGT1	YER028C	MIG3	0	0	1	0	0	1
YKL038W	RGT1	YDR277C	MTH1	0	0	0	0	0	1
YKL038W	RGT1	YPL026C	SKS1	0	0	0	0	0	1
YKL038W	RGT1	YOR047C	STD1	0	0	0	0	0	1
YKL038W	RGT1	YIL162W	SUC2	0	0	0	0	0	1
YKL038W	RGT1	YMR291W	TDA1	0	0	0	0	0	1
YKL038W	RGT1	YKR098C	UBP11	0	0	0	0	0	1
YKL038W	RGT1	YBR105C	VID24	0	0	0	0	0	1
YKL038W	RGT1	YKR075C	YKR075C	0	0	0	0	0	1
YKL038W	RGT1	YLR108C	YLR108C	0	0	0	0	0	1
YKL038W	RGT1	YNL234W	YNL234W	0	0	0	0	0	1
YKL038W	RGT1	YOR062C	YOR062C	0	0	0	0	0	1
YKL043W	PHD1	YLR304C	ACO1	0	0	0	0	0	1
YKL043W	PHD1	YMR083W	ADH3	0	0	0	0	0	1
YKL043W	PHD1	YPL061W	ALD6	0	0	0	0	1	1
YKL043W	PHD1	YDR441C	APT2	0	0	0	0	1	0
YKL043W	PHD1	YPR192W	AQY1	0	0	0	0	0	1
YKL043W	PHD1	YLL052C	AQY2	0	0	0	0	0	1
YKL043W	PHD1	YBR249C	ARO4	0	0	0	0	1	0
YKL043W	PHD1	YDR384C	ATO3	0	0	0	0	1	0
YKL043W	PHD1	YBR068C	BAP2	0	0	0	0	1	0
YKL043W	PHD1	YLR399C	BDF1	0	0	0	0	1	0
YKL043W	PHD1	YGR230W	BNS1	0	0	0	0	1	1
YKL043W	PHD1	YPL048W	CAM1	0	0	0	0	0	1
YKL043W	PHD1	YPL111W	CAR1	0	0	0	0	1	0
YKL043W	PHD1	YOR028C	CIN5	0	0	0	0	0	1
YKL043W	PHD1	YJL158C	CIS3	0	0	0	0	0	1
YKL043W	PHD1	YNL298W	CLA4	0	0	0	0	0	1
YKL043W	PHD1	YGR108W	CLB1	0	0	0	0	0	1
YKL043W	PHD1	YMR199W	CLN1	0	0	0	0	1	1
YKL043W	PHD1	YBR203W	COS111	0	0	0	0	1	0
YKL043W	PHD1	YOR303W	CPA1	0	0	0	0	1	0
YKL043W	PHD1	YPR030W	CSR2	0	0	0	0	1	1
YKL043W	PHD1	YPL177C	CUP9	0	0	0	0	1	1
YKL043W	PHD1	YKL096W	CWP1	0	0	0	0	1	1
YKL043W	PHD1	YJR150C	DAN1	0	0	0	0	1	1
YKL043W	PHD1	YMR173W	DDR48	0	0	0	0	1	1
YKL043W	PHD1	YLR348C	DIC1	0	0	0	0	1	1
YKL043W	PHD1	YPL265W	DIP5	0	0	0	0	1	0
YKL043W	PHD1	YNR067C	DSE4	0	0	0	0	1	1
YKL043W	PHD1	YHL016C	DUR3	0	0	0	0	1	0
YKL043W	PHD1	YLR401C	DUS3	0	0	0	0	0	1
YKL043W	PHD1	YBL043W	ECM13	0	0	0	0	1	1
YKL043W	PHD1	YLR300W	EXG1	0	0	0	0	1	1
YKL043W	PHD1	YMR319C	FET4	0	0	0	0	1	1
YKL043W	PHD1	YCR089W	FIG2	0	0	0	0	1	0
YKL043W	PHD1	YFL022C	FRS2	0	0	0	0	0	1
YKL043W	PHD1	YHR049W	FSH1	0	0	0	0	0	1
YKL043W	PHD1	YER145C	FTR1	0	0	0	0	0	1
YKL043W	PHD1	YBR020W	GAL1	0	0	0	0	0	1
YKL043W	PHD1	YFL021W	GAT1	0	0	0	0	1	0
YKL043W	PHD1	YMR136W	GAT2	0	0	0	0	1	1
YKL043W	PHD1	YIR013C	GAT4	0	0	0	0	1	0
YKL043W	PHD1	YPR184W	GDB1	0	0	0	0	1	0
YKL043W	PHD1	YCR098C	GIT1	0	0	0	0	0	1
YKL043W	PHD1	YDR508C	GNP1	0	0	0	0	0	1
YKL043W	PHD1	YHR005C	GPA1	0	0	0	0	0	1
YKL043W	PHD1	YPL189W	GUP2	0	0	0	0	1	0
YKL043W	PHD1	YFL027C	GYP8	0	0	0	0	0	1
YKL043W	PHD1	YDR295C	HDA2	0	0	0	0	1	0
YKL043W	PHD1	YDR047W	HEM12	0	0	0	0	0	1
YKL043W	PHD1	YOR032C	HMS1	0	0	0	0	1	0
YKL043W	PHD1	YJR147W	HMS2	0	0	0	0	0	1
YKL043W	PHD1	HOR2	HOR2	0	0	0	0	1	0
YKL043W	PHD1	YCR021C	HSP30	0	0	0	0	0	1
YKL043W	PHD1	YHR094C	HXT1	0	0	0	0	1	1
YKL043W	PHD1	YNR072W	HXT17	0	0	0	0	1	0
YKL043W	PHD1	YMR011W	HXT2	0	0	0	0	1	1
YKL043W	PHD1	YDR345C	HXT3	0	0	0	0	0	1
YKL043W	PHD1	YHR096C	HXT5	0	0	0	0	0	1
YKL043W	PHD1	YDR343C	HXT6	0	0	0	0	1	0
YKL043W	PHD1	YMR195W	ICY1	0	0	0	0	1	0
YKL043W	PHD1	YPL250C	ICY2	0	0	0	0	1	0
YKL043W	PHD1	YOL157C	IMA2	0	0	0	0	1	0
YKL043W	PHD1	YHR216W	IMD2	0	0	0	0	1	0
YKL043W	PHD1	YJL153C	INO1	0	0	0	0	1	0
YKL043W	PHD1	YPL017C	IRC15	0	0	0	0	1	1
YKL043W	PHD1	YPL135W	ISU1	0	0	0	0	0	1
YKL043W	PHD1	YOR226C	ISU2	0	0	0	0	1	0
YKL043W	PHD1	YPL054W	LEE1	0	0	0	0	0	1
YKL043W	PHD1	YNL104C	LEU4	0	0	0	0	1	0
YKL043W	PHD1	YKL085W	MDH1	0	0	0	0	0	1
YKL043W	PHD1	YER001W	MNN1	0	0	0	0	1	1
YKL043W	PHD1	YGR014W	MSB2	0	0	0	0	1	0
YKL043W	PHD1	YKL062W	MSN4	0	0	0	0	1	0
YKL043W	PHD1	YPR149W	NCE102	0	0	0	0	0	1
YKL043W	PHD1	YNL036W	NCE103	0	0	0	0	0	1
YKL043W	PHD1	YDR043C	NRG1	0	0	0	0	1	1
YKL043W	PHD1	YBR066C	NRG2	0	0	0	0	0	1
YKL043W	PHD1	YLR044C	PDC1	0	0	0	0	0	1
YKL043W	PHD1	YPL058C	PDR12	0	0	0	0	1	0
YKL043W	PHD1	YDR406W	PDR15	0	0	0	0	1	0
YKL043W	PHD1	YBL030C	PET9	0	0	0	0	1	0
YKL043W	PHD1	YKL043W	PHD1	0	0	0	0	1	1
YKL043W	PHD1	YER037W	PHM8	0	0	0	0	0	1
YKL043W	PHD1	YBR092C	PHO3	0	0	0	0	1	0
YKL043W	PHD1	YBR296C	PHO89	0	0	0	0	1	1
YKL043W	PHD1	YMR006C	PLB2	0	0	0	0	1	1
YKL043W	PHD1	YOL011W	PLB3	0	0	0	0	1	0
YKL043W	PHD1	YOR161C	PNS1	0	0	0	0	1	1
YKL043W	PHD1	YPL156C	PRM4	0	0	0	0	1	0
YKL043W	PHD1	YIL117C	PRM5	0	0	0	0	0	1
YKL043W	PHD1	YJL079C	PRY1	0	0	0	0	1	0
YKL043W	PHD1	YKR013W	PRY2	0	0	0	0	1	1
YKL043W	PHD1	YER075C	PTP3	0	0	0	0	0	1
YKL043W	PHD1	YKR093W	PTR2	0	0	0	0	1	0
YKL043W	PHD1	YGL062W	PYC1	0	0	0	0	1	1
YKL043W	PHD1	YGL158W	RCK1	0	0	0	0	1	1
YKL043W	PHD1	YOR107W	RGS2	0	0	0	0	0	1
YKL043W	PHD1	YHL024W	RIM4	0	0	0	0	1	0
YKL043W	PHD1	YGL045W	RIM8	0	0	0	0	0	1
YKL043W	PHD1	YPL024W	RMI1	0	0	0	0	1	0
YKL043W	PHD1	YGR180C	RNR4	0	0	0	0	1	0
YKL043W	PHD1	YPR065W	ROX1	0	0	0	0	0	1
YKL043W	PHD1	YIL119C	RPI1	0	0	0	0	1	0
YKL043W	PHD1	YOR049C	RSB1	0	0	0	0	1	1
YKL043W	PHD1	YMR266W	RSN1	0	0	0	0	1	1
YKL043W	PHD1	YLR180W	SAM1	0	0	0	0	1	0
YKL043W	PHD1	YJL105W	SET4	0	0	0	0	1	0
YKL043W	PHD1	YOR315W	SFG1	0	0	0	0	0	1
YKL043W	PHD1	YIL099W	SGA1	0	0	0	0	1	1
YKL043W	PHD1	YER096W	SHC1	0	0	0	0	1	0
YKL043W	PHD1	YPL026C	SKS1	0	0	0	0	0	1
YKL043W	PHD1	YMR016C	SOK2	0	0	0	0	1	0
YKL043W	PHD1	YMR017W	SPO20	0	0	0	0	1	0
YKL043W	PHD1	YIL073C	SPO22	0	0	0	0	0	1
YKL043W	PHD1	YBR250W	SPO23	0	0	0	0	0	1
YKL043W	PHD1	YER046W	SPO73	0	0	0	0	0	1
YKL043W	PHD1	YOR247W	SRL1	0	0	0	0	1	0
YKL043W	PHD1	YKR091W	SRL3	0	0	0	0	0	1
YKL043W	PHD1	YFL026W	STE2	0	0	0	0	1	0
YKL043W	PHD1	YDR536W	STL1	0	0	0	0	0	1
YKL043W	PHD1	YDL048C	STP4	0	0	0	0	0	1
YKL043W	PHD1	YML052W	SUR7	0	0	0	0	1	0
YKL043W	PHD1	YBR069C	TAT1	0	0	0	0	1	1
YKL043W	PHD1	YBR083W	TEC1	0	0	0	0	1	1
YKL043W	PHD1	YBR240C	THI2	0	0	0	0	1	0
YKL043W	PHD1	YLR237W	THI7	0	0	0	0	1	1
YKL043W	PHD1	YBR067C	TIP1	0	0	0	0	1	1
YKL043W	PHD1	YER011W	TIR1	0	0	0	0	0	1
YKL043W	PHD1	YIL011W	TIR3	0	0	0	0	1	1
YKL043W	PHD1	YGL096W	TOS8	0	0	0	0	1	1
YKL043W	PHD1	YLL028W	TPO1	0	0	0	0	1	0
YKL043W	PHD1	YGR138C	TPO2	0	0	0	0	0	1
YKL043W	PHD1	YOR344C	TYE7	0	0	0	0	0	1
YKL043W	PHD1	YPL230W	USV1	0	0	0	0	1	0
YKL043W	PHD1	YEL040W	UTR2	0	0	0	0	1	1
YKL043W	PHD1	YHL028W	WSC4	0	0	0	0	1	1
YKL043W	PHD1	YOR230W	WTM1	0	0	0	0	1	0
YKL043W	PHD1	YIL101C	XBP1	0	0	0	0	0	1
YKL043W	PHD1	YAL064W	YAL064W	0	0	0	0	0	1
YKL043W	PHD1	YDR259C	YAP6	0	0	0	0	1	1
YKL043W	PHD1	YBL029W	YBL029W	0	0	0	0	1	1
YKL043W	PHD1	YBL044W	YBL044W	0	0	0	0	0	1
YKL043W	PHD1	YBR238C	YBR238C	0	0	0	0	0	1
YKL043W	PHD1	YDR186C	YDR186C	0	0	0	0	1	0
YKL043W	PHD1	YER158C	YER158C	0	0	0	0	0	1
YKL043W	PHD1	YGR050C	YGR050C	0	0	0	0	1	0
YKL043W	PHD1	YGR067C	YGR067C	0	0	0	0	1	0
YKL043W	PHD1	YGR234W	YHB1	0	0	0	0	1	1
YKL043W	PHD1	YHR022C	YHR022C	0	0	0	0	1	0
YKL043W	PHD1	YHR177W	YHR177W	0	0	0	0	0	1
YKL043W	PHD1	YJL218W	YJL218W	0	0	0	0	1	1
YKL043W	PHD1	YKL044W	YKL044W	0	0	0	0	1	0
YKL043W	PHD1	YLR278C	YLR278C	0	0	0	0	0	1
YKL043W	PHD1	YLR297W	YLR297W	0	0	0	0	1	0
YKL043W	PHD1	YLR312C	YLR312C	0	0	0	0	1	0
YKL043W	PHD1	YLR413W	YLR413W	0	0	0	0	1	1
YKL043W	PHD1	YMR265C	YMR265C	0	0	0	0	0	1
YKL043W	PHD1	YNL144C	YNL144C	0	0	0	0	0	1
YKL043W	PHD1	YOR062C	YOR062C	0	0	0	0	1	1
YKL043W	PHD1	YOR302W	YOR302W	0	0	0	0	1	0
YKL043W	PHD1	YOL109W	ZEO1	0	0	0	0	0	1
YKL043W	PHD1	ZMS1	ZMS1	0	0	0	0	1	1
YKL043W	PHD1	YER033C	ZRG8	0	0	0	0	0	1
YKL109W	HAP4	YPR145W	ASN1	0	0	0	1	0	0
YKL109W	HAP4	YBL099W	ATP1	0	0	1	1	0	0
YKL109W	HAP4	YLR295C	ATP14	0	0	1	1	0	0
YKL109W	HAP4	YPL271W	ATP15	0	0	1	1	0	0
YKL109W	HAP4	YDL004W	ATP16	0	0	1	1	0	0
YKL109W	HAP4	YDR377W	ATP17	0	0	1	1	0	0
YKL109W	HAP4	YJR121W	ATP2	0	0	1	1	0	0
YKL109W	HAP4	YPR020W	ATP20	0	0	1	1	0	0
YKL109W	HAP4	YBR039W	ATP3	0	0	1	1	0	0
YKL109W	HAP4	YDR298C	ATP5	0	0	1	1	0	0
YKL109W	HAP4	YKL016C	ATP7	0	0	1	1	0	0
YKL109W	HAP4	YBL045C	COR1	0	0	1	1	0	0
YKL109W	HAP4	YLR038C	COX12	0	0	1	1	0	0
YKL109W	HAP4	YGL191W	COX13	0	0	1	1	0	0
YKL109W	HAP4	YGL187C	COX4	0	0	1	1	0	0
YKL109W	HAP4	COX5a	COX5a	0	0	1	1	0	0
YKL109W	HAP4	YHR051W	COX6	0	0	1	1	0	0
YKL109W	HAP4	YMR256C	COX7	0	0	1	1	0	0
YKL109W	HAP4	YLR395C	COX8	0	0	1	1	0	0
YKL109W	HAP4	YDL067C	COX9	0	0	1	1	0	0
YKL109W	HAP4	YJR048W	CYC1	0	0	0	1	0	0
YKL109W	HAP4	YOR065W	CYT1	0	0	1	1	0	0
YKL109W	HAP4	YPL262W	FUM1	0	0	0	1	0	0
YKL109W	HAP4	YJL103C	GSM1	0	0	0	1	0	0
YKL109W	HAP4	YDL181W	INH1	0	0	1	1	0	0
YKL109W	HAP4	YIL125W	KGD1	0	0	0	1	0	0
YKL109W	HAP4	YDR148C	KGD2	0	0	0	1	0	0
YKL109W	HAP4	YKL085W	MDH1	0	0	0	1	0	0
YKL109W	HAP4	YJL102W	MEF2	0	0	0	1	0	0
YKL109W	HAP4	YJR077C	MIR1	0	0	1	1	0	0
YKL109W	HAP4	YMR145C	NDE1	0	0	0	1	0	0
YKL109W	HAP4	YML120C	NDI1	0	0	1	1	0	0
YKL109W	HAP4	YBL030C	PET9	0	0	1	1	0	0
YKL109W	HAP4	YNL055C	POR1	0	0	0	1	0	0
YKL109W	HAP4	YPR191W	QCR2	0	0	1	1	0	0
YKL109W	HAP4	YFR033C	QCR6	0	0	1	1	0	0
YKL109W	HAP4	YDR529C	QCR7	0	0	1	1	0	0
YKL109W	HAP4	YJL166W	QCR8	0	0	0	1	0	0
YKL109W	HAP4	YGR183C	QCR9	0	0	1	1	0	0
YKL109W	HAP4	YEL024W	RIP1	0	0	1	1	0	0
YKL109W	HAP4	YML091C	RPM2	0	0	1	1	0	0
YKL109W	HAP4	YKL148C	SDH1	0	0	0	1	0	0
YKL109W	HAP4	YKL141W	SDH3	0	0	0	1	0	0
YKL109W	HAP4	YDR178W	SDH4	0	0	0	1	0	0
YKL109W	HAP4	YDR322C-A	TIM11	0	0	0	1	0	0
YKL109W	HAP4	YOR187W	TUF1	0	0	1	1	0	0
YKL109W	HAP4	YLR168C	UPS2	0	0	1	1	0	0
YKL222C	S000001705	YKL221W	MCH2	0	0	0	1	0	0
YKL222C	S000001705	YLL028W	TPO1	0	0	0	1	0	0
YKR064W	OAF3	YHR022C	YHR022C	0	0	1	0	0	0
YKR064W	OAF3	YNR063W	YNR063W	0	0	1	0	0	0
YKR099W	BAS1	YNL220W	ADE12	0	0	0	1	0	0
YKR099W	BAS1	YLR359W	ADE13	0	0	1	1	0	0
YKR099W	BAS1	YMR120C	ADE17	0	0	1	1	0	0
YKR099W	BAS1	YOR128C	ADE2	0	0	0	1	0	0
YKR099W	BAS1	YGR204W	ADE3	0	0	1	1	0	0
YKR099W	BAS1	YMR300C	ADE4	0	0	1	1	0	0
YKR099W	BAS1	YGL234W	ADE5,7	0	0	1	1	0	0
YKR099W	BAS1	YGR061C	ADE6	0	0	1	1	0	0
YKR099W	BAS1	YDR408C	ADE8	0	0	1	1	0	0
YKR099W	BAS1	YER061C	CEM1	0	0	1	1	0	0
YKR099W	BAS1	YDR019C	GCV1	0	0	1	1	0	0
YKR099W	BAS1	YMR189W	GCV2	0	0	1	0	0	0
YKR099W	BAS1	YAL044C	GCV3	0	0	1	1	0	0
YKR099W	BAS1	YCL030C	HIS4	0	0	1	1	0	0
YKR099W	BAS1	YLL027W	ISA1	0	0	0	1	0	0
YKR099W	BAS1	YER091C	MET6	0	0	1	1	0	0
YKR099W	BAS1	YKR080W	MTD1	0	0	1	1	0	0
YKR099W	BAS1	YNL221C	POP1	0	0	0	1	0	0
YKR099W	BAS1	YLR058C	SHM2	0	0	1	1	0	0
YKR099W	BAS1	YFL059W	SNZ3	0	0	0	1	0	0
YKR099W	BAS1	YGL186C	TPN1	0	0	1	1	0	0
YKR099W	BAS1	YDR018C	YDR018C	0	0	0	1	0	0
YKR099W	BAS1	YMR243C	ZRC1	0	0	0	1	0	0
YLR098C	CHA4	YCL064C	CHA1	0	0	1	0	0	0
YLR098C	CHA4	YDR304C	CPR5	0	0	1	0	0	0
YLR098C	CHA4	YOR319W	HSH49	0	0	1	0	0	0
YLR098C	CHA4	YGR100W	MDR1	0	0	1	0	0	0
YLR098C	CHA4	YDR523C	SPS1	0	0	1	0	0	0
YLR098C	CHA4	YCL063W	VAC17	0	0	1	0	0	0
YLR131C	ACE2	YBR158W	AMN1	0	0	1	1	0	0
YLR131C	ACE2	YNL269W	BSC4	0	0	0	1	0	0
YLR131C	ACE2	YGR041W	BUD9	0	0	1	1	0	0
YLR131C	ACE2	YPR105C	COG4	0	0	0	1	0	0
YLR131C	ACE2	YOR316C	COT1	0	0	0	1	0	0
YLR131C	ACE2	YLR286C	CTS1	0	0	1	1	0	0
YLR131C	ACE2	YER124C	DSE1	0	0	1	1	0	0
YLR131C	ACE2	YHR143W	DSE2	0	0	1	1	0	0
YLR131C	ACE2	YOR264W	DSE3	0	0	0	1	0	0
YLR131C	ACE2	YNL327W	EGT2	0	0	1	1	0	0
YLR131C	ACE2	YIL009W	FAA3	0	0	0	1	0	0
YLR131C	ACE2	YFL021W	GAT1	0	0	0	1	0	0
YLR131C	ACE2	YLR258W	GSY2	0	0	0	1	0	0
YLR131C	ACE2	YJR147W	HMS2	0	0	1	1	0	0
YLR131C	ACE2	YPR106W	ISR1	0	0	0	1	0	0
YLR131C	ACE2	YNL328C	MDJ2	0	0	0	1	0	0
YLR131C	ACE2	YNL078W	NIS1	0	0	0	1	0	0
YLR131C	ACE2	YER154W	OXA1	0	0	0	1	0	0
YLR131C	ACE2	YDL127W	PCL2	0	0	0	1	0	0
YLR131C	ACE2	YDL179W	PCL9	0	0	0	1	0	0
YLR131C	ACE2	YJL078C	PRY3	0	0	0	1	0	0
YLR131C	ACE2	YDL055C	PSA1	0	0	0	1	0	0
YLR131C	ACE2	YGL229C	SAP4	0	0	0	1	0	0
YLR131C	ACE2	YGL028C	SCW11	0	0	1	1	0	0
YLR131C	ACE2	YBR162C	TOS1	0	0	0	1	0	0
YLR131C	ACE2	YPL230W	USV1	0	0	0	1	0	0
YLR131C	ACE2	YER152C	YER152C	0	0	0	1	0	0
YLR176C	RFX1	YOR280C	FSH3	0	0	1	0	0	0
YLR176C	RFX1	YOR269W	PAC1	0	0	0	1	0	0
YLR176C	RFX1	YJL026W	RNR2	0	0	1	1	0	0
YLR176C	RFX1	YIL066C	RNR3	0	0	1	0	0	0
YLR176C	RFX1	YGR180C	RNR4	0	0	1	1	0	0
YLR176C	RFX1	YLR034C	SMF3	0	0	0	1	0	0
YLR176C	RFX1	YMR279C	YMR279C	0	0	1	1	0	0
YLR176C	RFX1	YOR268C	YOR268C	0	0	0	1	0	0
YLR176C	RFX1	YOR378W	YOR378W	0	0	1	1	0	0
YLR256W	HAP1	YMR056C	AAC1	0	0	0	0	0	1
YLR256W	HAP1	YGR037C	ACB1	0	0	0	0	0	1
YLR256W	HAP1	YLR153C	ACS2	0	0	0	0	0	1
YLR256W	HAP1	YGR204W	ADE3	0	0	0	0	0	1
YLR256W	HAP1	YNL148C	ALF1	0	0	0	0	0	1
YLR256W	HAP1	YJR047C	ANB1	0	0	0	0	0	1
YLR256W	HAP1	YNL065W	AQR1	0	0	0	0	0	1
YLR256W	HAP1	YNR019W	ARE2	0	0	0	0	0	1
YLR256W	HAP1	YJL115W	ASF1	0	0	0	0	0	1
YLR256W	HAP1	YGR177C	ATF2	0	0	0	0	0	1
YLR256W	HAP1	YJR078W	BNA2	0	0	0	0	0	1
YLR256W	HAP1	YPL111W	CAR1	0	0	0	0	0	1
YLR256W	HAP1	YLR438W	CAR2	0	0	0	0	0	1
YLR256W	HAP1	YGR174C	CBP4	0	0	0	0	0	1
YLR256W	HAP1	YDR270W	CCC2	0	0	0	0	0	1
YLR256W	HAP1	YOR028C	CIN5	0	0	0	0	0	1
YLR256W	HAP1	YOR356W	CIR2	0	0	0	0	0	1
YLR256W	HAP1	YGR110W	CLD1	0	0	0	0	0	1
YLR256W	HAP1	YBR203W	COS111	0	0	0	0	0	1
YLR256W	HAP1	YGL191W	COX13	0	0	0	0	0	1
YLR256W	HAP1	YER141W	COX15	0	0	0	0	0	1
YLR256W	HAP1	YGL187C	COX4	0	0	0	0	0	1
YLR256W	HAP1	COX5a	COX5a	0	0	0	0	0	1
YLR256W	HAP1	YLR395C	COX8	0	0	0	0	0	1
YLR256W	HAP1	YLR213C	CRR1	0	0	0	0	0	1
YLR256W	HAP1	YPR124W	CTR1	0	0	0	0	0	1
YLR256W	HAP1	YGR088W	CTT1	0	0	0	0	0	1
[truncated: 1,269 more rows]
